# Supplementary material for: Pan-Cancer analysis of the expression and regulation of matrisome genes across 32 tumor types
Source: PubMed Central journal article supplement (PMC7852311; doi:10.1016/j.mbplus.2019.04.001), 2019-04-06
Supplement: mmc1.pdf [file mmc1.pdf]

**Pan-Cancer analysis of the expression and regulation of matrisome genes across 32  
tumor types**

Valerio Izzi, Juho Lakkala, Raman Devarajan, Anni Kääriäinen, Jarkko Koivunen, Ritva Heljasvaara  
and Taina Pihlajaniemi

**SUPPLEMENTAL DATA**

Supplemental data for this manuscript include 17 figures and 14 tables

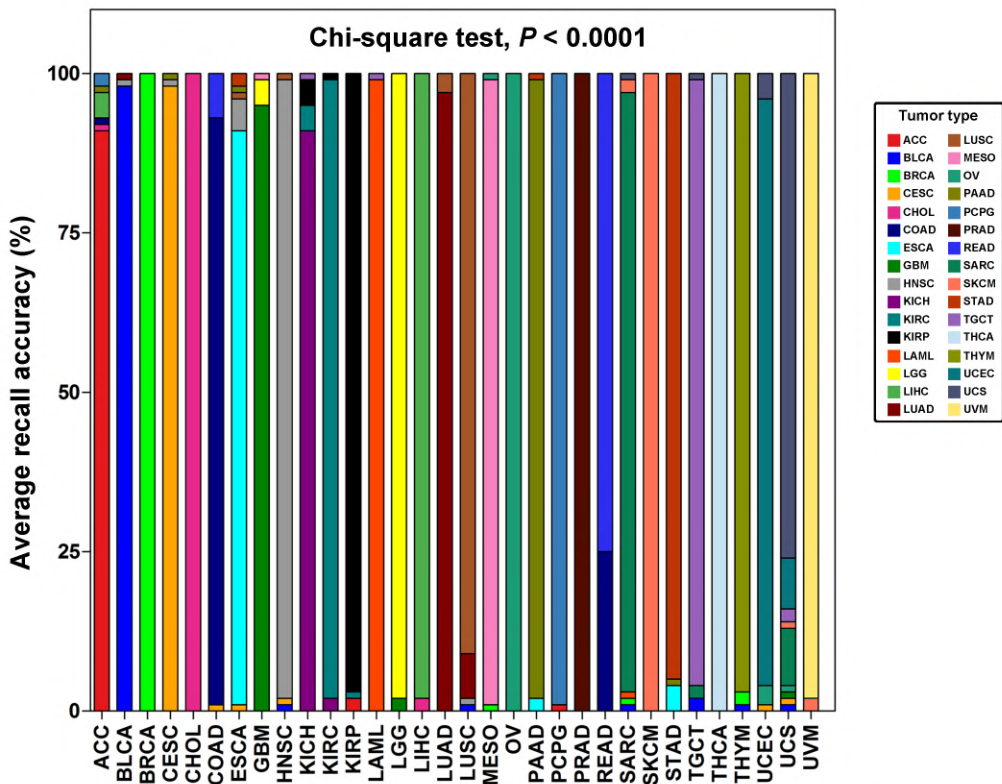

**Supplemental Figure 1. Average recall accuracy of cross-tumor classification using matrisome gene expression.** 3 independent classification algorithms (SVM, NN and C5.0) were used to classify each patient into one of the 32 possible tumor types, the assignment being repeated 100 times randomly per each algorithm. The recall accuracy (percentile of properly and missclassified cases) was then calculated as the average of all tests.

a

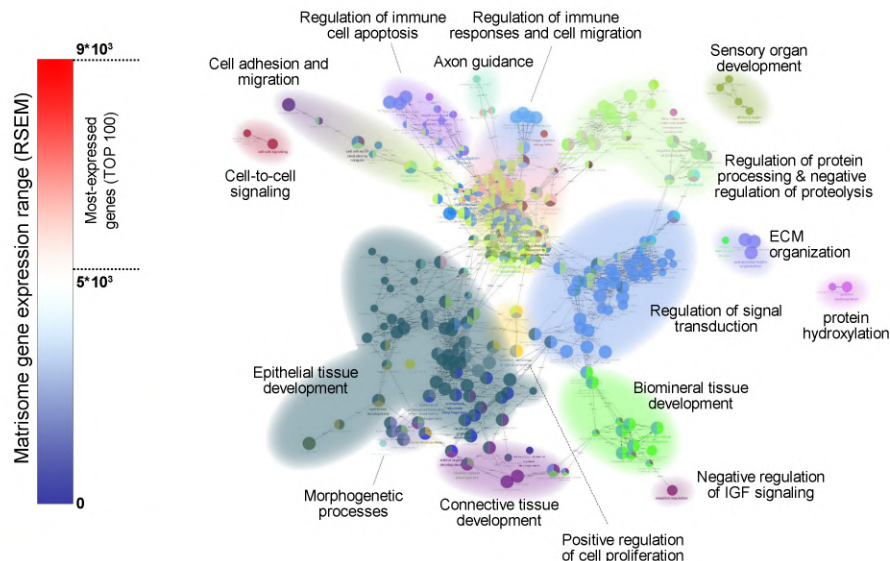

b

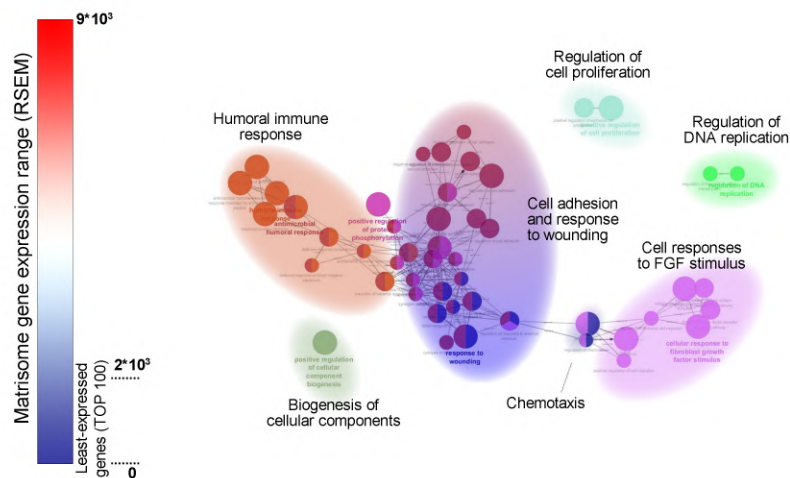

**Supplemental Data Figure 2. Gene ontology enrichment of the most- and least-expressed matrisome genes.** Network-based gene ontology (GO) enrichment for biological processes of the 100 most and least expressed matrisome genes for each tumor type. Results were calculated using only experimentally-validated evidence and plotted using the ClueGO plugin for Cytoscape. **(a)** Most expressed and **(b)** least expressed genes. The expression range for the genes in (a) and (b) is reported.

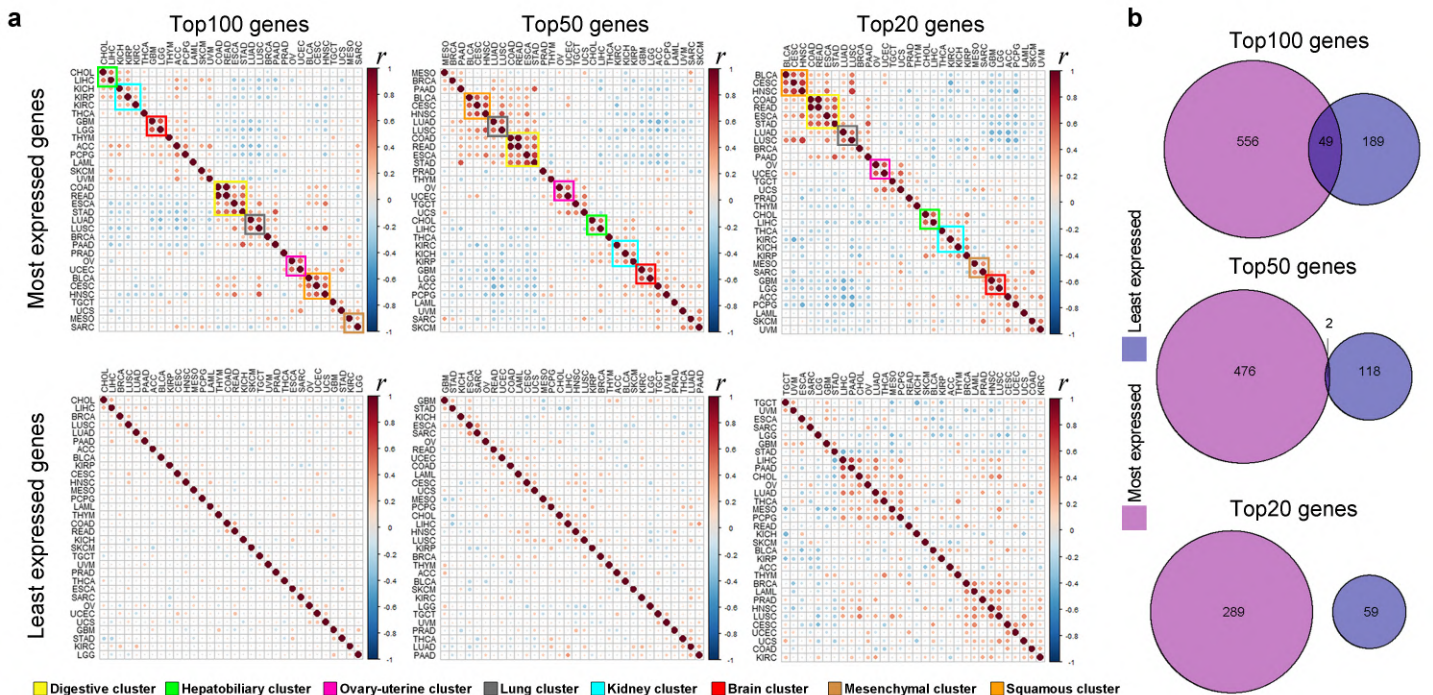

**Supplemental Figure 3. Upregulated matrisome genes identify functional clusters of tumors.** (a) Inter-tumor correlation (Pearson correlation ( $r$ )) based on the 100, 50 or 20 most- and least-expressed matrisome genes in each tumor type. Clusters of highly correlated tumor types, only observable by most expressed (upper panel) genes, are reported as colored squares. (b) Overlap between most and least expressed matrisome genes in different tumor types at different amount of top genes sampled.



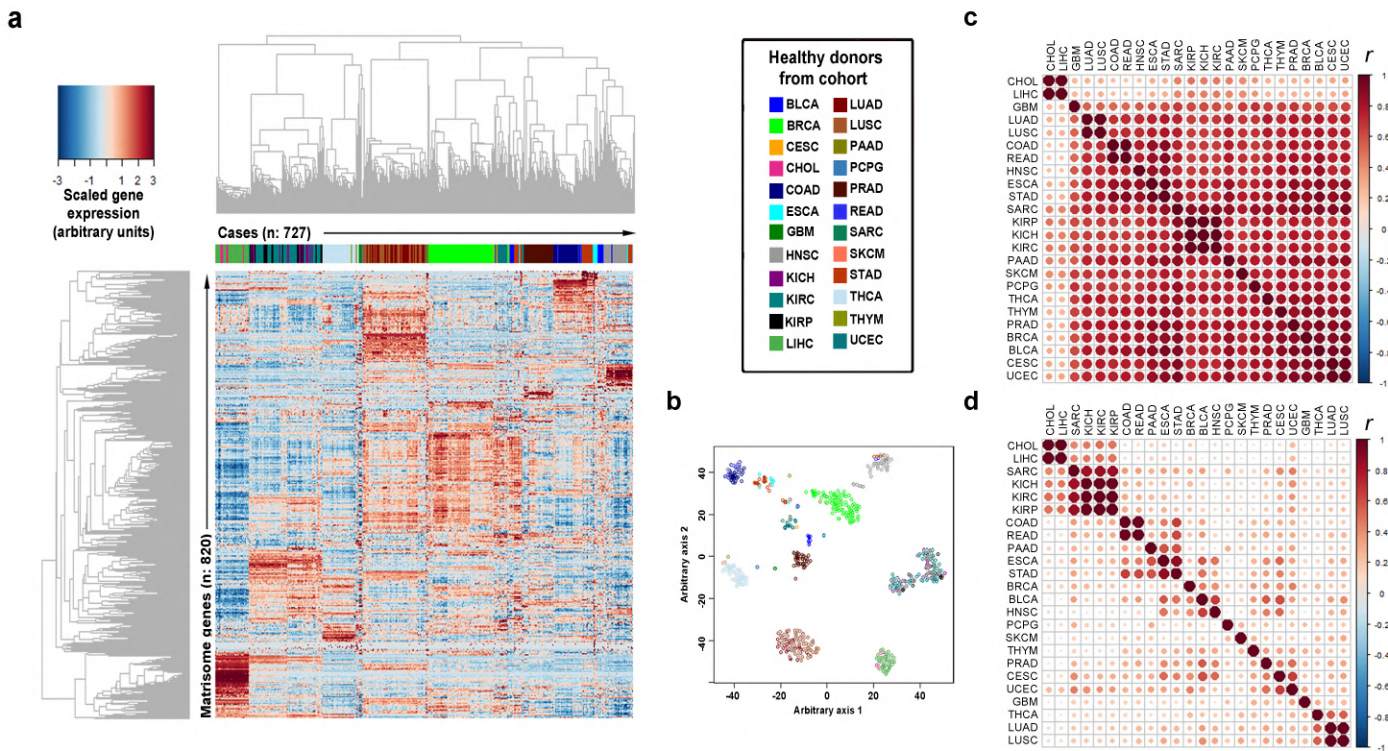

**Supplemental Figure 4. Expression of matrisome genes in healthy donor tissues from The Cancer Genome Atlas (TCGA) shows overall higher inter-tissue similarities.** Expression of the same matrisome genes as in the tumor samples in 727 cases from 24 of the 32 tumor cohorts analyzed. **(a)** Heatmap of gene expression and, **(b)** multidimensional scaling of the data according to t-SNE. **(c,d)** Correlation (Pearson correlation ( $r$ )) between the different sample types based on the 100 most **(c)** and least expressed **(d)** matrisome genes.

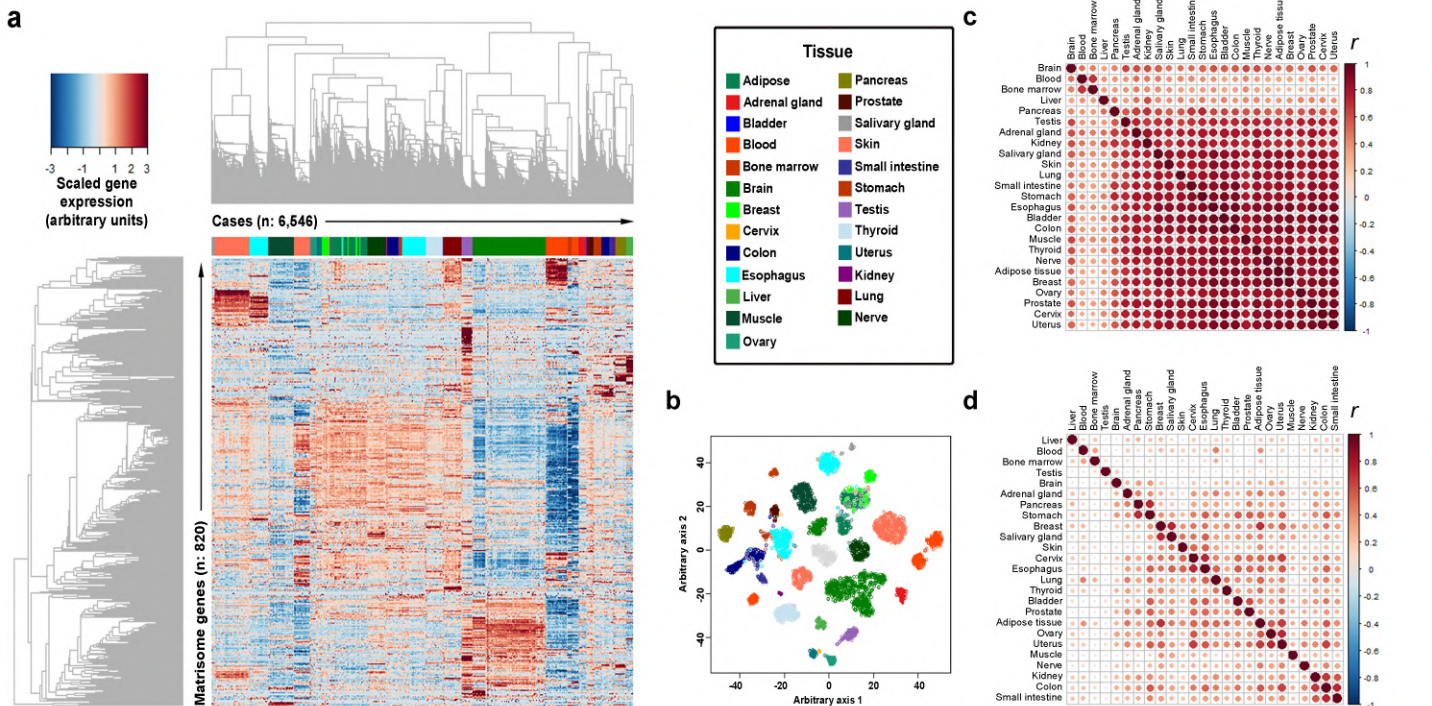

**Supplemental Figure 5. Expression of matrisome genes in healthy donor tissues from the Genotype-Tissue Expression (GTEx) database shows overall higher inter-tissue similarities.** Expression of the same matrisome genes as in the tumor samples in 6,546 cases from 25 healthy tissues, anatomically comparable to the tumor sites. **(a)** Heatmap of gene expression and, **(b)** multidimensional scaling of the data according to t-SNE. **(c,d)** Correlation (Pearson correlation ( $r$ )) between the different sample types based on the 100 most **(c)** and least expressed matrisome genes **(d)**.





## Izzi et al Supplemental Figure 7

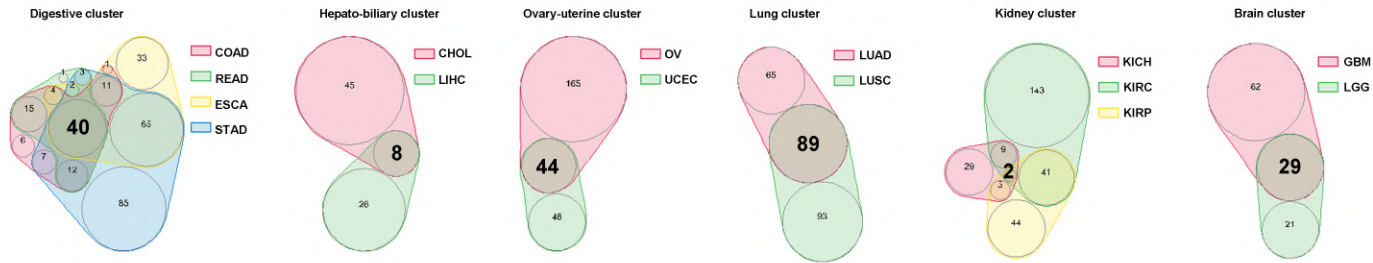

**Supplemental Figure 7. Intersection of individual tumor matrisome signatures to generate cluster-level signatures.** Each individual tumor matrisome signature was intersected with all other signatures from tumors in the same cluster. Genes common to all members of the cluster (bold) were considered as constituents of cluster-level signatures.



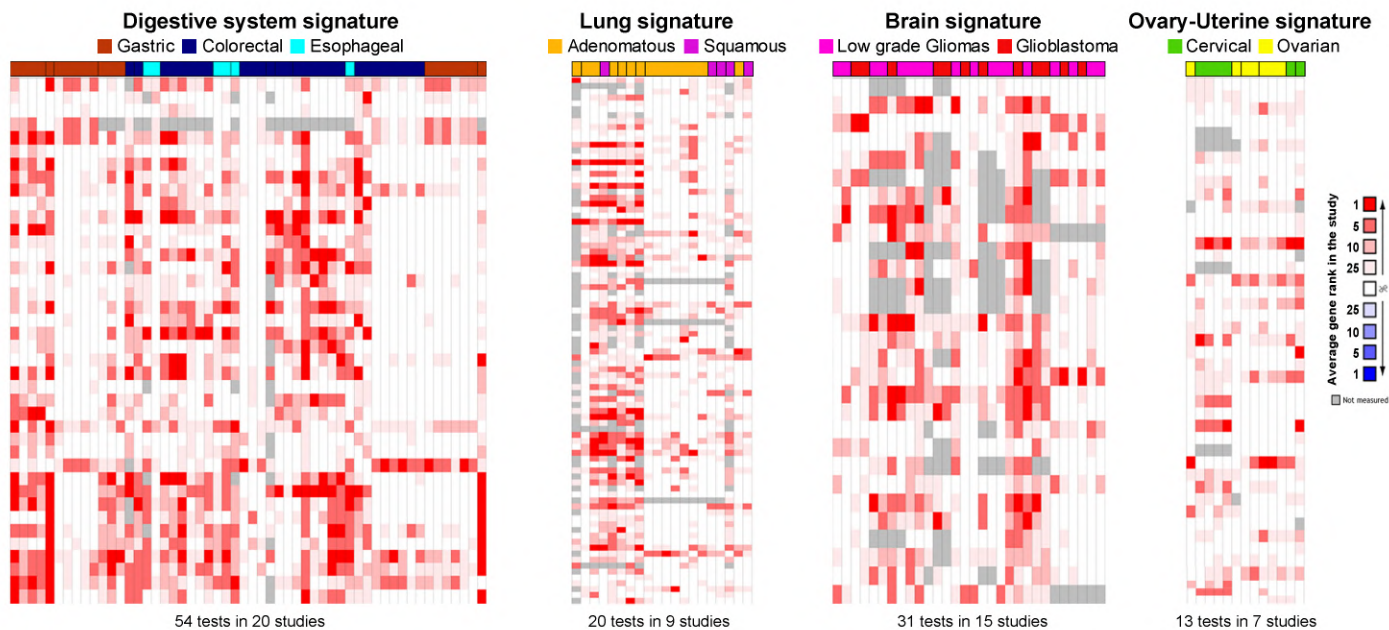

**Supplemental Figure 8. Tumor cluster-level matrisome signatures.** Cross-validation of cluster signatures by ranking of their components in different cohorts vs. respective healthy samples. Each column represents a test (tumor vs. healthy, order is as in Supplemental Table 13), and the row a gene (order is as in Supplemental Table 5). Red indicates that the given matrisome gene has higher ranking in tumor than in normal, blue that the given matrisome gene has lower ranking in tumor than in normal, white indicates no change and grey no values for the gene. Data are from *OncoPrint* meta-analysis engine.







a

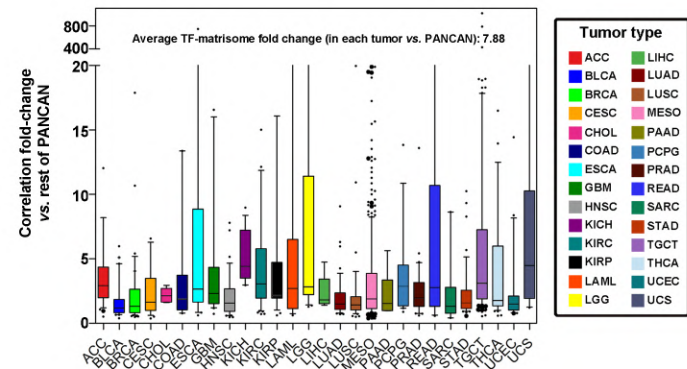

b

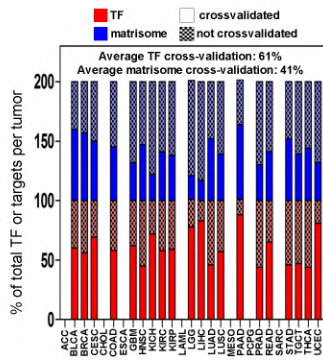

c

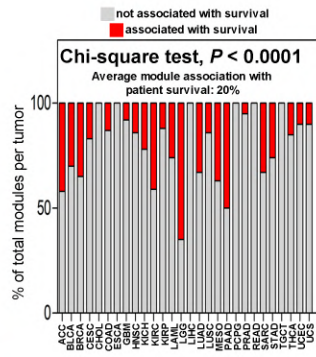

**ESupplemental Figure 11. Features of the matrisome modules.** (a) TF-matrisome correlation (Pearson  $r$ ) in any given tumor's module vs. the same TF-matrisome pair in the rest of the PANCAN cohort. Values are expressed as fold-change in each tumor vs. the rest of the Pan-Cancer (PANCAN) cohort. (b) % Cross-validation of TF and targets from each module in matching samples from The Human Protein Atlas (% number of TF or matrisome genes with "High" or "Medium" staining), and (c) % frequency of modules associated with differential patient survival in any given tumor.



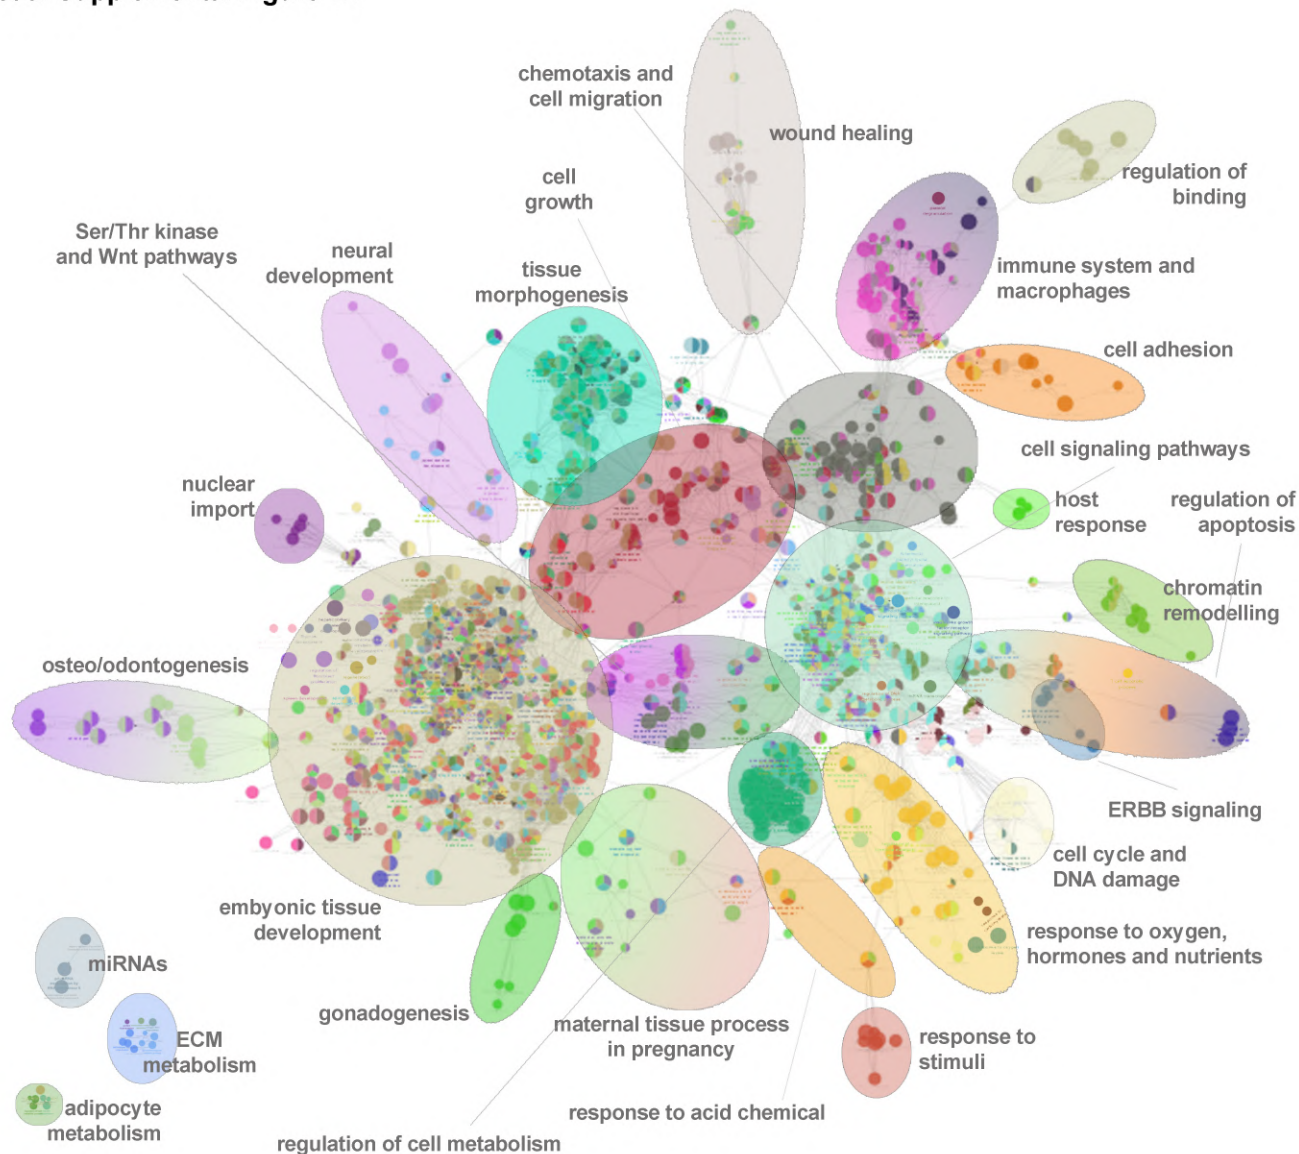

**Supplemental Figure 12. Gene ontology enrichment of the whole matrisome modules and their master regulators.** Network-based gene ontology (GO) enrichment for biological processes of the totality of modules and master regulators. Results were calculated and plotted using the ClueGO plugin for Cytoscape using only experimentally validated interactions, an enrichment threshold  $P < 0.05$  evidence and GO term fusion. Ontological overlays are manually drawn and annotated.

a

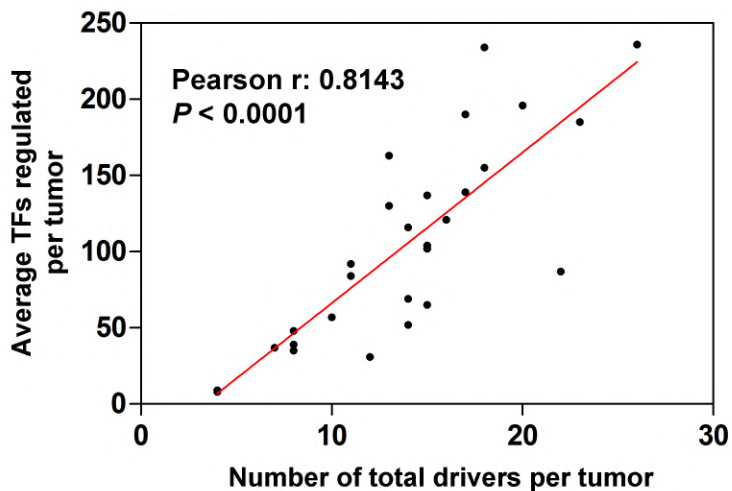

b

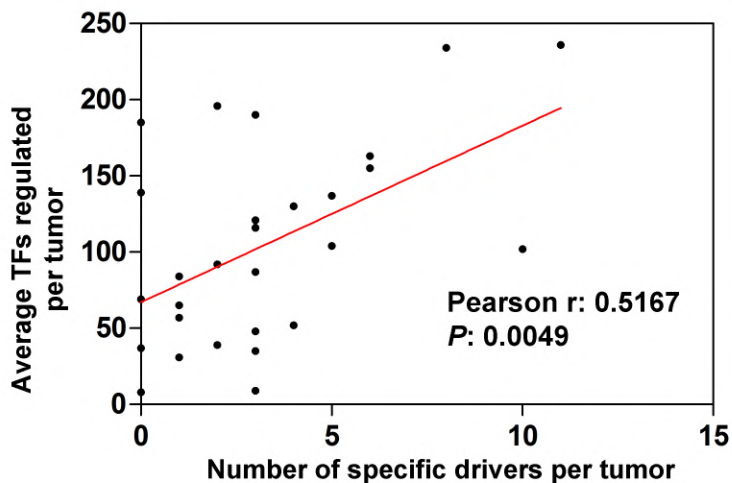

**Supplemental Figure 13. Correlations between master regulators and matrisome-controlling transcription factors (TF).** The number of cancer drivers in any given tumor correlated linearly with the number of matrisome-controlling TFs identified in the same tumor, either when the total number of drivers (a) or only the cancer-specific drivers (b) were considered.

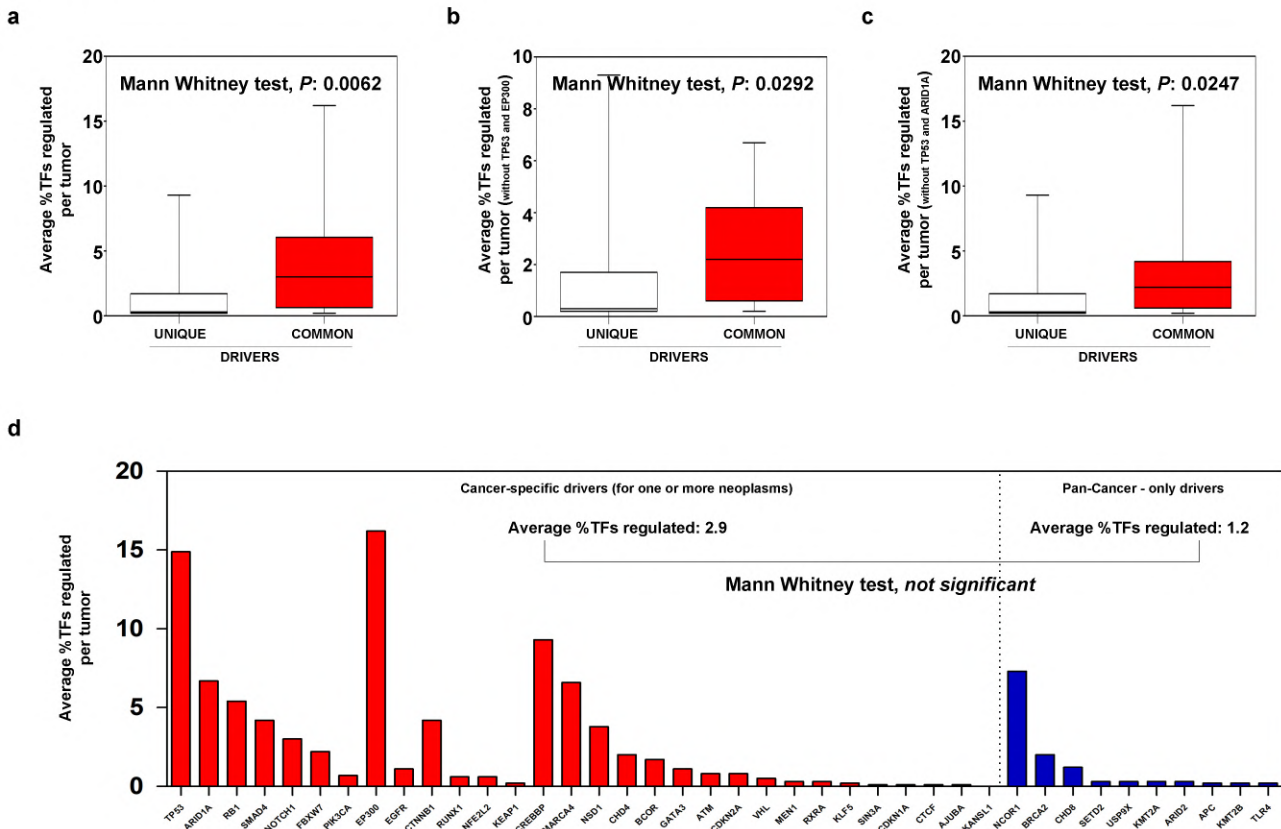

**Supplemental Figure 14. Modular structure of the cancer matrisome at the master regulator level.** Cancer driver genes shared by at least two tumor types (“common”) are (a) hubs in the cancer matrisome networks, regulating more TFs (in percentile) than the drivers active in one tumor type only (“unique”), even when (b) most common drivers (*TP53* and *EP300*) or (c) most recurrent cancer-specific drivers (*TP53* and *ARID1A*) were excluded from the analysis. (d) Cancer-specific drivers also regulated more TFs than Pan-Cancer - only drivers (those that are not found as specific drivers for any of the neoplasms studied).

a

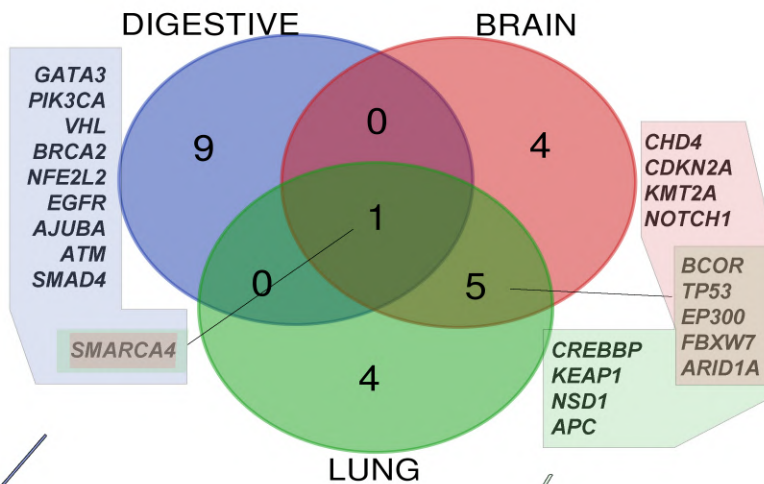

b

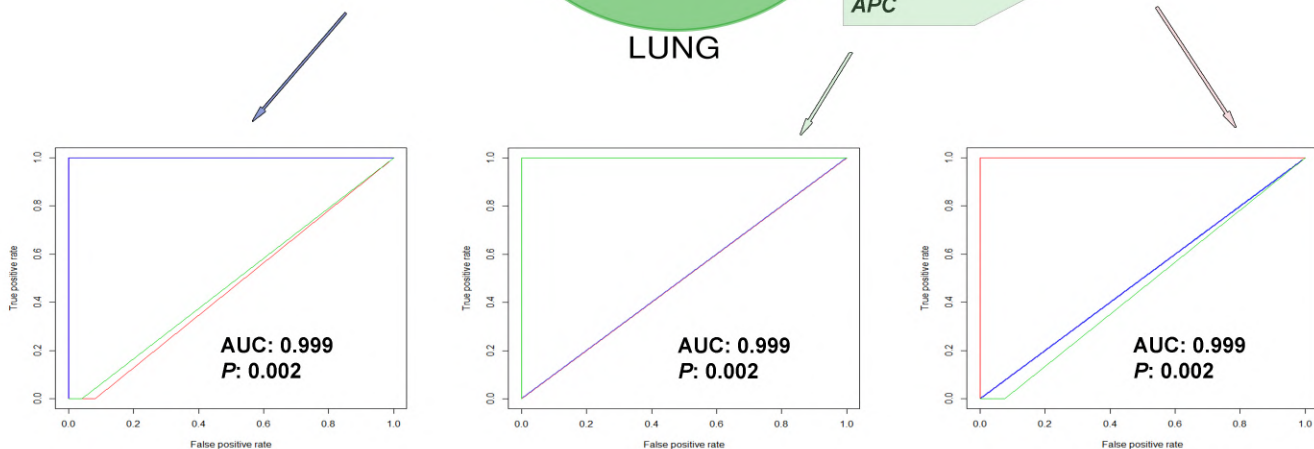

**Supplemental Figure 15. Specificity of the master regulators at the cluster level.** (a) Most important matrisome-regulating cancer drivers for digestive (ESCA, STAD, COAD and READ), brain (GBM and LGG) or lung (LUAD and LUSC) clusters extracted by Linear Support Vector Machine (LSVM) and their overlap. (b) Area under the curve (AUC) of the Receiver Operating Characteristic (ROC) graph for each group of master regulators, evaluating the ability of the given set of driver genes to correctly score the cluster of pertinence of the set. Note that colors follow the scheme in (a).



a

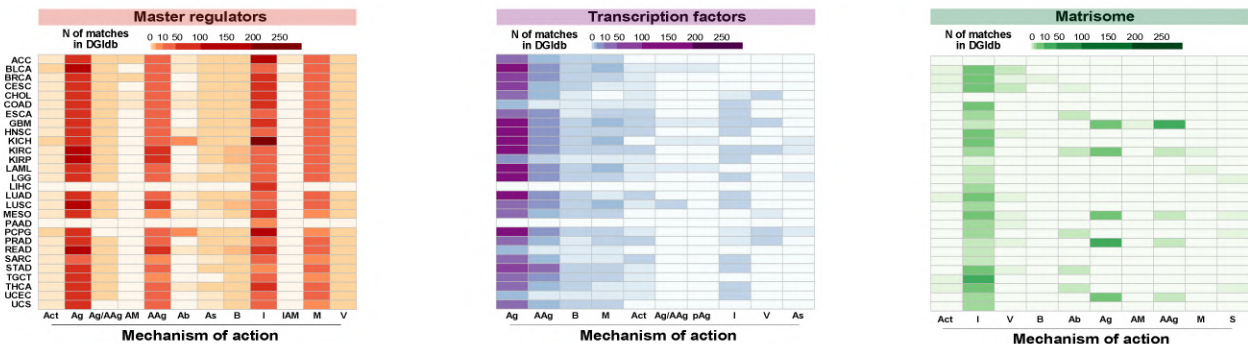

b

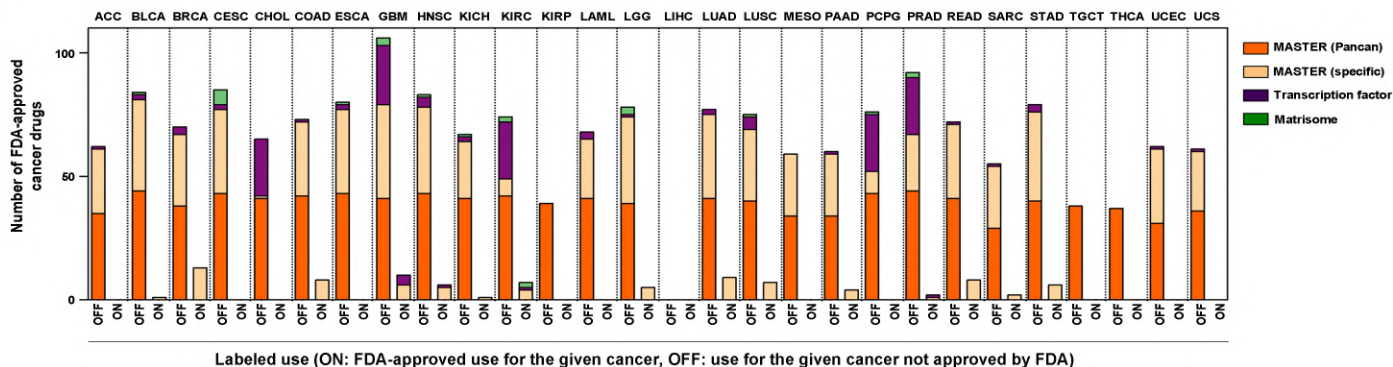

**Supplemental Figure 16. Druggability of the cancer matrisome.** (a) Identification of potential therapeutic approaches (e.g., drugs, small molecules, RNA interference, etc.) targeting the master regulators (left), transcription factors (middle) and the 28 matrisome signatures (right) identified in this study. Abbreviations: Act, activator; Ag, agonist; AAg, antagonist; Ag/AAg, agonist/antagonist; AM, allosteric modulator; Ab, antibody; As, antisense; B, binder; I, inhibitor; IAM, inhibitor/allosteric modulator; M, modulator; V, vaccine; pAg, partial agonist. (b) Number of FDA-approved cancer drugs with the potential to target master regulators, transcription factors and the matrisome proper, either used on-label (drug approved for the given cancer) or off-label (drug not approved for the given cancer).

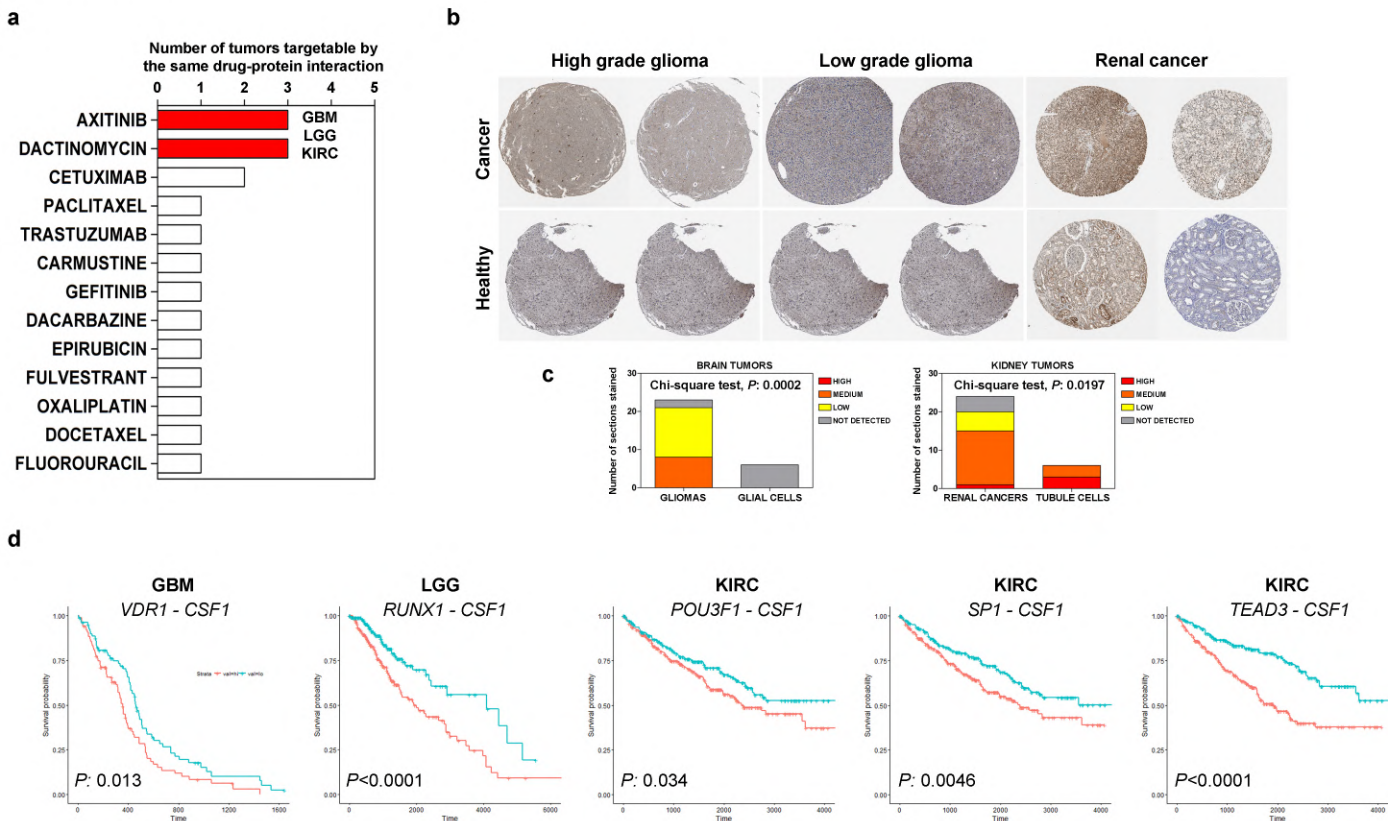

**Supplemental Figure 17. Targeting the cancer matrix: the example of macrophage colony-stimulating factor 1 (CSF1).** Drugs with the same target and mechanism of action in different tumors indicate favorable multi-cancer drug targets. **(a)** Considering in example only the drugs acting on actual matrix proteins, Axitinib and Dactinomycin are found in the lists of glioblastoma (GBM), lower-grade glioma (LGG) and kidney clear cell carcinoma (KIRC). **(b)** Upregulation of CSF1 receptor (CSF1R) in brain and kidney tumors from The Human Protein Atlas and, **(c)** increased expression of CSF1R in indicated tumors vs. matching healthy tissues. Note that antibody staining for CSF1 has not yet been performed for the same sections. **(d)** Overall survival (days) of patients with above ("high") or below ("low") the cohort's average expression of *TF-CSF1* modules.

**Supplemental Table 1. Composition of the Pan-Cancer cohort**

| <b>Tumor type</b>                     | <b>Abbreviation</b> | <b>System of origin</b> | <b>Number of patients</b> |
|---------------------------------------|---------------------|-------------------------|---------------------------|
| Adrenocortical cancer                 | ACC                 | Endocrine               | 77                        |
| Bladder urothelial carcinoma          | BLCA                | Excretory               | 426                       |
| Breast invasive carcinoma             | BRCA                | Reproductive            | 1212                      |
| Cervical and endocervical cancer      | CESC                | Reproductive            | 309                       |
| Cholangiocarcinoma                    | CHOL                | Digestive               | 45                        |
| Colon adenocarcinoma                  | COAD                | Digestive               | 331                       |
| Esophageal carcinoma                  | ESCA                | Digestive               | 195                       |
| Glioblastoma multiforme               | GBM                 | Neurosensory            | 171                       |
| Head and neck squamous cell carcinoma | HNSC                | Tegument                | 564                       |
| Kidney chromophobe cell carcinoma     | KICH                | Excretory               | 91                        |
| Kidney clear cell carcinoma           | KIRC                | Excretory               | 603                       |
| Kidney papillary cell carcinoma       | KIRP                | Excretory               | 321                       |
| Acute myeloid leukemia                | LAML                | Hematopoietic           | 173                       |
| Brain lower grade glioma              | LGG                 | Neurosensory            | 523                       |
| Liver hepatocellular carcinoma        | LIHC                | Digestive               | 421                       |
| Lung adenocarcinoma                   | LUAD                | Respiratory             | 574                       |
| Lung squamous cell carcinoma          | LUSC                | Respiratory             | 548                       |
| Mesothelioma                          | MESO                | Respiratory             | 87                        |
| Ovarian serous cystadenocarcinoma     | OV                  | Reproductive            | 427                       |
| Pancreatic adenocarcinoma             | PAAD                | Digestive               | 183                       |
| Pheochromocytoma and paraganglioma    | PCPG                | Endocrine               | 185                       |
| Prostate adenocarcinoma               | PRAD                | Reproductive            | 548                       |
| Rectum adenocarcinoma                 | READ                | Digestive               | 103                       |
| Sarcoma                               | SARC                | Other                   | 264                       |
| Skin cutaneous melanoma               | SKCM                | Tegument                | 470                       |
| Stomach adenocarcinoma                | STAD                | Digestive               | 450                       |
| Testicular germ cell tumor            | TGCT                | Reproductive            | 154                       |
| Thyroid carcinoma                     | THCA                | Endocrine               | 571                       |
| Thymoma                               | THYM                | Hematopoietic           | 121                       |
| Uterine corpus endometrioid carcinoma | UCEC                | Reproductive            | 204                       |
| Uterine carcinosarcoma                | UCS                 | Reproductive            | 57                        |
| Uveal melanoma                        | UVM                 | Neurosensory            | 79                        |







### C5.0 Classification and Regression Tress (C5.0)

|      | ACC   | BLCA  | BRCA  | CESC  | CHOL  | COAD  | ESCA  | GBM   | HNSC  | KICH  | KIRC  | KIRP  | LAML  | LGG   | LIHC  | LUAD  | LUSC  | MESO  | OV    | PAAD | PCPG  | PRAD  | READ  | SARC  | SKCM  | STAD  | TGCT | THCA  | THYM  | UCEC  | UCS   | UVM   |       |
|------|-------|-------|-------|-------|-------|-------|-------|-------|-------|-------|-------|-------|-------|-------|-------|-------|-------|-------|-------|------|-------|-------|-------|-------|-------|-------|------|-------|-------|-------|-------|-------|-------|
| ACC  | 100 % | 0 %   | 0 %   | 0 %   | 0 %   | 0 %   | 0 %   | 0 %   | 0 %   | 0 %   | 0 %   | 0 %   | 0 %   | 0 %   | 0 %   | 0 %   | 0 %   | 0 %   | 0 %   | 0 %  | 0 %   | 0 %   | 0 %   | 0 %   | 0 %   | 0 %   | 0 %  | 0 %   | 0 %   | 0 %   | 0 %   | 0 %   |       |
| BLCA | 0 %   | 100 % | 0 %   | 0 %   | 0 %   | 0 %   | 0 %   | 0 %   | 0 %   | 0 %   | 0 %   | 0 %   | 0 %   | 0 %   | 0 %   | 0 %   | 0 %   | 0 %   | 0 %   | 0 %  | 0 %   | 0 %   | 0 %   | 0 %   | 0 %   | 0 %   | 0 %  | 0 %   | 0 %   | 0 %   | 0 %   | 0 %   | 0 %   |
| BRCA | 0 %   | 0 %   | 100 % | 0 %   | 0 %   | 0 %   | 0 %   | 0 %   | 0 %   | 0 %   | 0 %   | 0 %   | 0 %   | 0 %   | 0 %   | 0 %   | 0 %   | 0 %   | 0 %   | 0 %  | 0 %   | 0 %   | 0 %   | 0 %   | 0 %   | 0 %   | 0 %  | 0 %   | 0 %   | 0 %   | 0 %   | 0 %   | 0 %   |
| CESC | 0 %   | 0 %   | 0 %   | 100 % | 0 %   | 0 %   | 0 %   | 0 %   | 0 %   | 0 %   | 0 %   | 0 %   | 0 %   | 0 %   | 0 %   | 0 %   | 0 %   | 0 %   | 0 %   | 0 %  | 0 %   | 0 %   | 0 %   | 0 %   | 0 %   | 0 %   | 0 %  | 0 %   | 0 %   | 0 %   | 0 %   | 0 %   | 0 %   |
| CHOL | 0 %   | 0 %   | 0 %   | 0 %   | 100 % | 0 %   | 0 %   | 0 %   | 0 %   | 0 %   | 0 %   | 0 %   | 0 %   | 0 %   | 0 %   | 0 %   | 0 %   | 0 %   | 0 %   | 0 %  | 0 %   | 0 %   | 0 %   | 0 %   | 0 %   | 0 %   | 0 %  | 0 %   | 0 %   | 0 %   | 0 %   | 0 %   | 0 %   |
| COAD | 0 %   | 0 %   | 0 %   | 0 %   | 0 %   | 100 % | 0 %   | 0 %   | 0 %   | 0 %   | 0 %   | 0 %   | 0 %   | 0 %   | 0 %   | 0 %   | 0 %   | 0 %   | 0 %   | 0 %  | 0 %   | 0 %   | 0 %   | 25 %  | 0 %   | 0 %   | 0 %  | 0 %   | 0 %   | 0 %   | 0 %   | 0 %   | 0 %   |
| ESCA | 0 %   | 0 %   | 0 %   | 0 %   | 0 %   | 0 %   | 100 % | 0 %   | 0 %   | 0 %   | 0 %   | 0 %   | 0 %   | 0 %   | 0 %   | 0 %   | 0 %   | 0 %   | 0 %   | 0 %  | 0 %   | 0 %   | 0 %   | 0 %   | 0 %   | 0 %   | 0 %  | 0 %   | 0 %   | 0 %   | 0 %   | 0 %   | 0 %   |
| GBM  | 0 %   | 0 %   | 0 %   | 0 %   | 0 %   | 0 %   | 0 %   | 100 % | 0 %   | 0 %   | 0 %   | 0 %   | 0 %   | 0 %   | 0 %   | 0 %   | 0 %   | 0 %   | 0 %   | 0 %  | 0 %   | 0 %   | 0 %   | 0 %   | 0 %   | 0 %   | 0 %  | 0 %   | 0 %   | 0 %   | 0 %   | 0 %   | 0 %   |
| HNSC | 0 %   | 0 %   | 0 %   | 0 %   | 0 %   | 0 %   | 0 %   | 0 %   | 100 % | 0 %   | 0 %   | 0 %   | 0 %   | 0 %   | 0 %   | 0 %   | 0 %   | 0 %   | 0 %   | 0 %  | 0 %   | 0 %   | 0 %   | 0 %   | 0 %   | 0 %   | 0 %  | 0 %   | 0 %   | 0 %   | 0 %   | 0 %   | 0 %   |
| KICH | 0 %   | 0 %   | 0 %   | 0 %   | 0 %   | 0 %   | 0 %   | 0 %   | 0 %   | 100 % | 0 %   | 0 %   | 0 %   | 0 %   | 0 %   | 0 %   | 0 %   | 0 %   | 0 %   | 0 %  | 0 %   | 0 %   | 0 %   | 0 %   | 0 %   | 0 %   | 0 %  | 0 %   | 0 %   | 0 %   | 0 %   | 0 %   | 0 %   |
| KIRC | 0 %   | 0 %   | 0 %   | 0 %   | 0 %   | 0 %   | 0 %   | 0 %   | 0 %   | 0 %   | 100 % | 0 %   | 0 %   | 0 %   | 0 %   | 0 %   | 0 %   | 0 %   | 0 %   | 0 %  | 0 %   | 0 %   | 0 %   | 0 %   | 0 %   | 0 %   | 0 %  | 0 %   | 0 %   | 0 %   | 0 %   | 0 %   | 0 %   |
| KIRP | 0 %   | 0 %   | 0 %   | 0 %   | 0 %   | 0 %   | 0 %   | 0 %   | 0 %   | 0 %   | 0 %   | 100 % | 0 %   | 0 %   | 0 %   | 0 %   | 0 %   | 0 %   | 0 %   | 0 %  | 0 %   | 0 %   | 0 %   | 0 %   | 0 %   | 0 %   | 0 %  | 0 %   | 0 %   | 0 %   | 0 %   | 0 %   | 0 %   |
| LAML | 0 %   | 0 %   | 0 %   | 0 %   | 0 %   | 0 %   | 0 %   | 0 %   | 0 %   | 0 %   | 0 %   | 0 %   | 100 % | 0 %   | 0 %   | 0 %   | 0 %   | 0 %   | 0 %   | 0 %  | 0 %   | 0 %   | 0 %   | 0 %   | 0 %   | 0 %   | 0 %  | 0 %   | 0 %   | 0 %   | 0 %   | 0 %   | 0 %   |
| LGG  | 0 %   | 0 %   | 0 %   | 0 %   | 0 %   | 0 %   | 0 %   | 0 %   | 0 %   | 0 %   | 0 %   | 0 %   | 0 %   | 100 % | 0 %   | 0 %   | 0 %   | 0 %   | 0 %   | 0 %  | 0 %   | 0 %   | 0 %   | 0 %   | 0 %   | 0 %   | 0 %  | 0 %   | 0 %   | 0 %   | 0 %   | 0 %   | 0 %   |
| LIHC | 0 %   | 0 %   | 0 %   | 0 %   | 0 %   | 0 %   | 0 %   | 0 %   | 0 %   | 0 %   | 0 %   | 0 %   | 0 %   | 0 %   | 100 % | 0 %   | 0 %   | 0 %   | 0 %   | 0 %  | 0 %   | 0 %   | 0 %   | 0 %   | 0 %   | 0 %   | 0 %  | 0 %   | 0 %   | 0 %   | 0 %   | 0 %   | 0 %   |
| LUAD | 0 %   | 0 %   | 0 %   | 0 %   | 0 %   | 0 %   | 0 %   | 0 %   | 0 %   | 0 %   | 0 %   | 0 %   | 0 %   | 0 %   | 0 %   | 100 % | 0 %   | 0 %   | 0 %   | 0 %  | 0 %   | 0 %   | 0 %   | 0 %   | 0 %   | 0 %   | 0 %  | 0 %   | 0 %   | 0 %   | 0 %   | 0 %   | 0 %   |
| LUSC | 0 %   | 0 %   | 0 %   | 0 %   | 0 %   | 0 %   | 0 %   | 0 %   | 0 %   | 0 %   | 0 %   | 0 %   | 0 %   | 0 %   | 0 %   | 0 %   | 100 % | 0 %   | 0 %   | 0 %  | 0 %   | 0 %   | 0 %   | 0 %   | 0 %   | 0 %   | 0 %  | 0 %   | 0 %   | 0 %   | 0 %   | 0 %   | 0 %   |
| MESO | 0 %   | 0 %   | 0 %   | 0 %   | 0 %   | 0 %   | 0 %   | 0 %   | 0 %   | 0 %   | 0 %   | 0 %   | 0 %   | 0 %   | 0 %   | 0 %   | 0 %   | 100 % | 0 %   | 0 %  | 0 %   | 0 %   | 0 %   | 0 %   | 0 %   | 0 %   | 0 %  | 0 %   | 0 %   | 0 %   | 0 %   | 0 %   | 0 %   |
| OV   | 0 %   | 0 %   | 0 %   | 0 %   | 0 %   | 0 %   | 0 %   | 0 %   | 0 %   | 0 %   | 0 %   | 0 %   | 0 %   | 0 %   | 0 %   | 0 %   | 0 %   | 0 %   | 100 % | 0 %  | 0 %   | 0 %   | 0 %   | 0 %   | 0 %   | 0 %   | 0 %  | 0 %   | 0 %   | 0 %   | 0 %   | 0 %   | 0 %   |
| PAAD | 0 %   | 0 %   | 0 %   | 0 %   | 0 %   | 0 %   | 0 %   | 0 %   | 0 %   | 0 %   | 0 %   | 0 %   | 0 %   | 0 %   | 0 %   | 0 %   | 0 %   | 0 %   | 0 %   | 0 %  | 100 % | 0 %   | 0 %   | 0 %   | 0 %   | 0 %   | 0 %  | 0 %   | 0 %   | 0 %   | 0 %   | 0 %   | 0 %   |
| PCPG | 0 %   | 0 %   | 0 %   | 0 %   | 0 %   | 0 %   | 0 %   | 0 %   | 0 %   | 0 %   | 0 %   | 0 %   | 0 %   | 0 %   | 0 %   | 0 %   | 0 %   | 0 %   | 0 %   | 0 %  | 0 %   | 100 % | 0 %   | 0 %   | 0 %   | 0 %   | 0 %  | 0 %   | 0 %   | 0 %   | 0 %   | 0 %   | 0 %   |
| PRAD | 0 %   | 0 %   | 0 %   | 0 %   | 0 %   | 0 %   | 0 %   | 0 %   | 0 %   | 0 %   | 0 %   | 0 %   | 0 %   | 0 %   | 0 %   | 0 %   | 0 %   | 0 %   | 0 %   | 0 %  | 0 %   | 0 %   | 100 % | 0 %   | 0 %   | 0 %   | 0 %  | 0 %   | 0 %   | 0 %   | 0 %   | 0 %   | 0 %   |
| READ | 0 %   | 0 %   | 0 %   | 0 %   | 0 %   | 0 %   | 0 %   | 0 %   | 0 %   | 0 %   | 0 %   | 0 %   | 0 %   | 0 %   | 0 %   | 0 %   | 0 %   | 0 %   | 0 %   | 0 %  | 0 %   | 0 %   | 0 %   | 75 %  | 0 %   | 0 %   | 0 %  | 0 %   | 0 %   | 0 %   | 0 %   | 0 %   | 0 %   |
| SARC | 0 %   | 0 %   | 0 %   | 0 %   | 0 %   | 0 %   | 0 %   | 0 %   | 0 %   | 0 %   | 0 %   | 0 %   | 0 %   | 0 %   | 0 %   | 0 %   | 0 %   | 0 %   | 0 %   | 0 %  | 0 %   | 0 %   | 0 %   | 100 % | 0 %   | 0 %   | 0 %  | 0 %   | 0 %   | 0 %   | 0 %   | 0 %   | 0 %   |
| SKCM | 0 %   | 0 %   | 0 %   | 0 %   | 0 %   | 0 %   | 0 %   | 0 %   | 0 %   | 0 %   | 0 %   | 0 %   | 0 %   | 0 %   | 0 %   | 0 %   | 0 %   | 0 %   | 0 %   | 0 %  | 0 %   | 0 %   | 0 %   | 0 %   | 100 % | 0 %   | 0 %  | 0 %   | 0 %   | 0 %   | 0 %   | 0 %   | 0 %   |
| STAD | 0 %   | 0 %   | 0 %   | 0 %   | 0 %   | 0 %   | 0 %   | 0 %   | 0 %   | 0 %   | 0 %   | 0 %   | 0 %   | 0 %   | 0 %   | 0 %   | 0 %   | 0 %   | 0 %   | 0 %  | 0 %   | 0 %   | 0 %   | 0 %   | 0 %   | 100 % | 0 %  | 0 %   | 0 %   | 0 %   | 0 %   | 0 %   | 0 %   |
| TGCT | 0 %   | 0 %   | 0 %   | 0 %   | 0 %   | 0 %   | 0 %   | 0 %   | 0 %   | 0 %   | 0 %   | 0 %   | 0 %   | 0 %   | 0 %   | 0 %   | 0 %   | 0 %   | 0 %   | 0 %  | 0 %   | 0 %   | 0 %   | 0 %   | 0 %   | 0 %   | 0 %  | 100 % | 0 %   | 0 %   | 0 %   | 0 %   | 0 %   |
| THCA | 0 %   | 0 %   | 0 %   | 0 %   | 0 %   | 0 %   | 0 %   | 0 %   | 0 %   | 0 %   | 0 %   | 0 %   | 0 %   | 0 %   | 0 %   | 0 %   | 0 %   | 0 %   | 0 %   | 0 %  | 0 %   | 0 %   | 0 %   | 0 %   | 0 %   | 0 %   | 0 %  | 0 %   | 100 % | 0 %   | 0 %   | 0 %   | 0 %   |
| THYM | 0 %   | 0 %   | 0 %   | 0 %   | 0 %   | 0 %   | 0 %   | 0 %   | 0 %   | 0 %   | 0 %   | 0 %   | 0 %   | 0 %   | 0 %   | 0 %   | 0 %   | 0 %   | 0 %   | 0 %  | 0 %   | 0 %   | 0 %   | 0 %   | 0 %   | 0 %   | 0 %  | 0 %   | 0 %   | 100 % | 0 %   | 0 %   | 0 %   |
| UCEC | 0 %   | 0 %   | 0 %   | 0 %   | 0 %   | 0 %   | 0 %   | 0 %   | 0 %   | 0 %   | 0 %   | 0 %   | 0 %   | 0 %   | 0 %   | 0 %   | 0 %   | 0 %   | 0 %   | 0 %  | 0 %   | 0 %   | 0 %   | 0 %   | 0 %   | 0 %   | 0 %  | 0 %   | 0 %   | 0 %   | 100 % | 0 %   | 0 %   |
| UCS  | 0 %   | 0 %   | 0 %   | 0 %   | 0 %   | 0 %   | 0 %   | 0 %   | 0 %   | 0 %   | 0 %   | 0 %   | 0 %   | 0 %   | 0 %   | 0 %   | 0 %   | 0 %   | 0 %   | 0 %  | 0 %   | 0 %   | 0 %   | 0 %   | 0 %   | 0 %   | 0 %  | 0 %   | 0 %   | 0 %   | 0 %   | 100 % | 0 %   |
| UVM  | 0 %   | 0 %   | 0 %   | 0 %   | 0 %   | 0 %   | 0 %   | 0 %   | 0 %   | 0 %   | 0 %   | 0 %   | 0 %   | 0 %   | 0 %   | 0 %   | 0 %   | 0 %   | 0 %   | 0 %  | 0 %   | 0 %   | 0 %   | 0 %   | 0 %   | 0 %   | 0 %  | 0 %   | 0 %   | 0 %   | 0 %   | 0 %   | 100 % |

% of correctly classified cases (azure) per tumor type. Significant outliers (> 5% misclassified cases) are highlighted in orange.

**Supplemental Table 3. Average recall accuracy**

|                        | ACC         | BLCA        | BRCA         | CESC        | CHOL         | COAD        | ESCA        | GBM         | HNSC        | KICH        | KIRC        | KIRP        | LAML        | LGG         | LIHC        | LUAD        | LUSC        | MESO        | OV          | PAAD        | PCPG        | PRAD         | READ        | SARC        | SKCM        | STAD        | TGCT        | THCA        | THYM        | UCEC        | UCS         | UVM         |            |            |
|------------------------|-------------|-------------|--------------|-------------|--------------|-------------|-------------|-------------|-------------|-------------|-------------|-------------|-------------|-------------|-------------|-------------|-------------|-------------|-------------|-------------|-------------|--------------|-------------|-------------|-------------|-------------|-------------|-------------|-------------|-------------|-------------|-------------|------------|------------|
| ACC                    | 91 %        | 0 %         | 0 %          | 0 %         | 0 %          | 0 %         | 0 %         | 0 %         | 0 %         | 0 %         | 0 %         | 2 %         | 0 %         | 0 %         | 0 %         | 0 %         | 0 %         | 0 %         | 0 %         | 0 %         | 1 %         | 0 %          | 0 %         | 0 %         | 0 %         | 0 %         | 0 %         | 0 %         | 0 %         | 0 %         | 0 %         | 0 %         | 0 %        |            |
| BLCA                   | 0 %         | 96 %        | 0 %          | 0 %         | 0 %          | 0 %         | 0 %         | 0 %         | 1 %         | 0 %         | 0 %         | 0 %         | 0 %         | 0 %         | 0 %         | 0 %         | 1 %         | 0 %         | 0 %         | 0 %         | 0 %         | 0 %          | 0 %         | 1 %         | 0 %         | 0 %         | 2 %         | 0 %         | 1 %         | 0 %         | 1 %         | 0 %         |            |            |
| BRCA                   | 0 %         | 0 %         | 100 %        | 0 %         | 0 %          | 0 %         | 0 %         | 0 %         | 0 %         | 0 %         | 0 %         | 0 %         | 0 %         | 0 %         | 0 %         | 0 %         | 0 %         | 1 %         | 0 %         | 0 %         | 0 %         | 0 %          | 0 %         | 1 %         | 0 %         | 0 %         | 0 %         | 0 %         | 2 %         | 0 %         | 0 %         | 0 %         | 0 %        |            |
| CESC                   | 0 %         | 0 %         | 0 %          | 97 %        | 0 %          | 1 %         | 1 %         | 0 %         | 1 %         | 0 %         | 0 %         | 0 %         | 0 %         | 0 %         | 0 %         | 0 %         | 0 %         | 0 %         | 0 %         | 0 %         | 0 %         | 0 %          | 0 %         | 0 %         | 0 %         | 0 %         | 0 %         | 0 %         | 0 %         | 1 %         | 1 %         | 0 %         | 0 %        |            |
| CHOL                   | 2 %         | 0 %         | 0 %          | 0 %         | 100 %        | 0 %         | 0 %         | 0 %         | 0 %         | 0 %         | 0 %         | 0 %         | 0 %         | 0 %         | 2 %         | 0 %         | 0 %         | 0 %         | 0 %         | 0 %         | 0 %         | 0 %          | 0 %         | 0 %         | 0 %         | 0 %         | 0 %         | 0 %         | 0 %         | 0 %         | 0 %         | 0 %         | 0 %        |            |
| COAD                   | 1 %         | 0 %         | 0 %          | 0 %         | 0 %          | 91 %        | 0 %         | 0 %         | 0 %         | 0 %         | 0 %         | 0 %         | 0 %         | 0 %         | 0 %         | 0 %         | 0 %         | 0 %         | 0 %         | 0 %         | 0 %         | 0 %          | 25 %        | 0 %         | 0 %         | 0 %         | 0 %         | 0 %         | 0 %         | 0 %         | 0 %         | 0 %         | 0 %        |            |
| ESCA                   | 0 %         | 0 %         | 0 %          | 0 %         | 0 %          | 0 %         | 89 %        | 0 %         | 0 %         | 0 %         | 0 %         | 0 %         | 0 %         | 0 %         | 0 %         | 0 %         | 0 %         | 0 %         | 0 %         | 2 %         | 0 %         | 0 %          | 0 %         | 0 %         | 0 %         | 4 %         | 0 %         | 0 %         | 0 %         | 0 %         | 0 %         | 0 %         | 0 %        |            |
| GBM                    | 0 %         | 0 %         | 0 %          | 0 %         | 0 %          | 0 %         | 0 %         | 95 %        | 0 %         | 0 %         | 0 %         | 0 %         | 0 %         | 2 %         | 0 %         | 0 %         | 0 %         | 0 %         | 0 %         | 0 %         | 0 %         | 0 %          | 0 %         | 0 %         | 0 %         | 0 %         | 0 %         | 0 %         | 0 %         | 0 %         | 1 %         | 0 %         | 0 %        |            |
| HNSC                   | 0 %         | 0 %         | 0 %          | 1 %         | 0 %          | 0 %         | 5 %         | 0 %         | 96 %        | 0 %         | 0 %         | 0 %         | 0 %         | 0 %         | 0 %         | 0 %         | 1 %         | 0 %         | 0 %         | 0 %         | 0 %         | 0 %          | 0 %         | 0 %         | 0 %         | 0 %         | 0 %         | 0 %         | 0 %         | 0 %         | 0 %         | 0 %         | 0 %        |            |
| KICH                   | 0 %         | 0 %         | 0 %          | 0 %         | 0 %          | 0 %         | 0 %         | 0 %         | 0 %         | 88 %        | 2 %         | 0 %         | 0 %         | 0 %         | 0 %         | 0 %         | 0 %         | 0 %         | 0 %         | 0 %         | 0 %         | 0 %          | 0 %         | 0 %         | 0 %         | 0 %         | 0 %         | 0 %         | 0 %         | 0 %         | 0 %         | 0 %         | 0 %        | 0 %        |
| KIRC                   | 0 %         | 0 %         | 0 %          | 0 %         | 0 %          | 0 %         | 0 %         | 0 %         | 0 %         | 4 %         | 96 %        | 1 %         | 0 %         | 0 %         | 0 %         | 0 %         | 0 %         | 0 %         | 0 %         | 0 %         | 0 %         | 0 %          | 0 %         | 0 %         | 0 %         | 0 %         | 0 %         | 0 %         | 0 %         | 0 %         | 0 %         | 0 %         | 0 %        | 0 %        |
| KIRP                   | 0 %         | 0 %         | 0 %          | 0 %         | 0 %          | 0 %         | 0 %         | 0 %         | 0 %         | 4 %         | 1 %         | 96 %        | 0 %         | 0 %         | 0 %         | 0 %         | 0 %         | 0 %         | 0 %         | 0 %         | 0 %         | 0 %          | 0 %         | 0 %         | 0 %         | 0 %         | 0 %         | 0 %         | 0 %         | 0 %         | 0 %         | 0 %         | 0 %        | 0 %        |
| LAML                   | 0 %         | 0 %         | 0 %          | 0 %         | 0 %          | 0 %         | 0 %         | 0 %         | 0 %         | 0 %         | 0 %         | 0 %         | 99 %        | 0 %         | 0 %         | 0 %         | 0 %         | 0 %         | 0 %         | 0 %         | 0 %         | 0 %          | 0 %         | 1 %         | 0 %         | 0 %         | 0 %         | 0 %         | 0 %         | 0 %         | 0 %         | 0 %         | 0 %        | 0 %        |
| LGG                    | 0 %         | 0 %         | 0 %          | 0 %         | 0 %          | 0 %         | 0 %         | 4 %         | 0 %         | 0 %         | 0 %         | 0 %         | 0 %         | 98 %        | 0 %         | 0 %         | 0 %         | 0 %         | 0 %         | 0 %         | 0 %         | 0 %          | 0 %         | 0 %         | 0 %         | 0 %         | 0 %         | 0 %         | 0 %         | 0 %         | 0 %         | 0 %         | 0 %        | 0 %        |
| LIHC                   | 4 %         | 0 %         | 0 %          | 0 %         | 0 %          | 0 %         | 0 %         | 0 %         | 0 %         | 0 %         | 0 %         | 0 %         | 0 %         | 0 %         | 97 %        | 0 %         | 0 %         | 0 %         | 0 %         | 0 %         | 0 %         | 0 %          | 0 %         | 0 %         | 0 %         | 0 %         | 0 %         | 0 %         | 0 %         | 0 %         | 0 %         | 0 %         | 0 %        | 0 %        |
| LUAD                   | 0 %         | 1 %         | 0 %          | 0 %         | 0 %          | 0 %         | 0 %         | 0 %         | 0 %         | 0 %         | 0 %         | 0 %         | 0 %         | 0 %         | 0 %         | 97 %        | 5 %         | 0 %         | 0 %         | 0 %         | 0 %         | 0 %          | 0 %         | 0 %         | 0 %         | 0 %         | 0 %         | 0 %         | 0 %         | 0 %         | 0 %         | 0 %         | 0 %        | 0 %        |
| LUSC                   | 0 %         | 0 %         | 0 %          | 0 %         | 0 %          | 0 %         | 1 %         | 0 %         | 1 %         | 0 %         | 0 %         | 0 %         | 0 %         | 0 %         | 0 %         | 1 %         | 91 %        | 0 %         | 0 %         | 0 %         | 0 %         | 0 %          | 0 %         | 0 %         | 0 %         | 0 %         | 0 %         | 0 %         | 0 %         | 0 %         | 0 %         | 0 %         | 0 %        | 0 %        |
| MESO                   | 0 %         | 0 %         | 0 %          | 0 %         | 0 %          | 0 %         | 0 %         | 1 %         | 0 %         | 0 %         | 0 %         | 0 %         | 0 %         | 0 %         | 0 %         | 0 %         | 0 %         | 99 %        | 0 %         | 0 %         | 0 %         | 0 %          | 0 %         | 0 %         | 0 %         | 0 %         | 0 %         | 0 %         | 0 %         | 0 %         | 0 %         | 0 %         | 0 %        | 0 %        |
| OV                     | 0 %         | 0 %         | 0 %          | 0 %         | 0 %          | 0 %         | 0 %         | 0 %         | 0 %         | 0 %         | 0 %         | 0 %         | 0 %         | 0 %         | 0 %         | 0 %         | 0 %         | 1 %         | 99 %        | 0 %         | 0 %         | 0 %          | 0 %         | 0 %         | 0 %         | 0 %         | 0 %         | 0 %         | 0 %         | 0 %         | 3 %         | 1 %         | 0 %        | 0 %        |
| PAAD                   | 1 %         | 0 %         | 0 %          | 1 %         | 0 %          | 0 %         | 1 %         | 0 %         | 0 %         | 0 %         | 0 %         | 0 %         | 0 %         | 0 %         | 0 %         | 0 %         | 0 %         | 0 %         | 0 %         | 96 %        | 0 %         | 0 %          | 0 %         | 0 %         | 0 %         | 1 %         | 0 %         | 0 %         | 0 %         | 0 %         | 0 %         | 0 %         | 0 %        | 0 %        |
| PCPG                   | 2 %         | 0 %         | 0 %          | 0 %         | 0 %          | 0 %         | 0 %         | 0 %         | 0 %         | 0 %         | 0 %         | 0 %         | 0 %         | 0 %         | 0 %         | 0 %         | 0 %         | 0 %         | 0 %         | 0 %         | 0 %         | 0 %          | 99 %        | 0 %         | 0 %         | 0 %         | 0 %         | 0 %         | 0 %         | 0 %         | 0 %         | 0 %         | 0 %        | 0 %        |
| PRAD                   | 0 %         | 0 %         | 0 %          | 0 %         | 0 %          | 0 %         | 0 %         | 0 %         | 0 %         | 0 %         | 0 %         | 0 %         | 0 %         | 0 %         | 0 %         | 0 %         | 0 %         | 0 %         | 0 %         | 0 %         | 0 %         | 0 %          | 100 %       | 0 %         | 0 %         | 0 %         | 0 %         | 0 %         | 0 %         | 0 %         | 0 %         | 0 %         | 0 %        | 0 %        |
| READ                   | 0 %         | 0 %         | 0 %          | 0 %         | 0 %          | 7 %         | 0 %         | 0 %         | 0 %         | 0 %         | 0 %         | 0 %         | 0 %         | 0 %         | 0 %         | 0 %         | 0 %         | 0 %         | 0 %         | 0 %         | 0 %         | 0 %          | 0 %         | 75 %        | 0 %         | 0 %         | 0 %         | 0 %         | 0 %         | 0 %         | 0 %         | 0 %         | 0 %        | 0 %        |
| SARC                   | 0 %         | 0 %         | 0 %          | 0 %         | 0 %          | 0 %         | 0 %         | 0 %         | 0 %         | 0 %         | 0 %         | 0 %         | 0 %         | 0 %         | 0 %         | 0 %         | 0 %         | 0 %         | 0 %         | 0 %         | 0 %         | 0 %          | 0 %         | 92 %        | 0 %         | 0 %         | 2 %         | 0 %         | 0 %         | 0 %         | 9 %         | 0 %         | 0 %        |            |
| SKCM                   | 0 %         | 0 %         | 0 %          | 0 %         | 0 %          | 0 %         | 0 %         | 0 %         | 0 %         | 0 %         | 0 %         | 0 %         | 0 %         | 0 %         | 0 %         | 0 %         | 0 %         | 0 %         | 0 %         | 0 %         | 0 %         | 0 %          | 0 %         | 2 %         | 99 %        | 0 %         | 0 %         | 0 %         | 0 %         | 0 %         | 1 %         | 2 %         | 0 %        |            |
| STAD                   | 0 %         | 0 %         | 0 %          | 0 %         | 0 %          | 0 %         | 2 %         | 0 %         | 0 %         | 0 %         | 0 %         | 0 %         | 0 %         | 0 %         | 0 %         | 0 %         | 0 %         | 0 %         | 0 %         | 1 %         | 0 %         | 0 %          | 0 %         | 0 %         | 0 %         | 94 %        | 0 %         | 0 %         | 0 %         | 0 %         | 0 %         | 0 %         | 0 %        | 0 %        |
| TGCT                   | 0 %         | 0 %         | 0 %          | 0 %         | 0 %          | 0 %         | 0 %         | 0 %         | 0 %         | 1 %         | 0 %         | 0 %         | 1 %         | 0 %         | 0 %         | 0 %         | 0 %         | 0 %         | 0 %         | 0 %         | 0 %         | 0 %          | 0 %         | 0 %         | 0 %         | 0 %         | 95 %        | 0 %         | 0 %         | 0 %         | 2 %         | 0 %         | 0 %        |            |
| THCA                   | 0 %         | 0 %         | 0 %          | 0 %         | 0 %          | 0 %         | 0 %         | 0 %         | 0 %         | 0 %         | 0 %         | 0 %         | 0 %         | 0 %         | 0 %         | 0 %         | 0 %         | 0 %         | 0 %         | 0 %         | 0 %         | 0 %          | 0 %         | 0 %         | 0 %         | 0 %         | 99 %        | 0 %         | 0 %         | 0 %         | 0 %         | 0 %         | 0 %        |            |
| THYM                   | 0 %         | 0 %         | 0 %          | 0 %         | 0 %          | 0 %         | 0 %         | 0 %         | 0 %         | 0 %         | 0 %         | 0 %         | 0 %         | 0 %         | 0 %         | 0 %         | 0 %         | 0 %         | 0 %         | 0 %         | 0 %         | 0 %          | 0 %         | 0 %         | 0 %         | 0 %         | 0 %         | 96 %        | 0 %         | 0 %         | 0 %         | 0 %         | 0 %        |            |
| UCEC                   | 0 %         | 0 %         | 0 %          | 0 %         | 0 %          | 0 %         | 0 %         | 0 %         | 0 %         | 0 %         | 0 %         | 0 %         | 0 %         | 0 %         | 0 %         | 0 %         | 0 %         | 0 %         | 0 %         | 0 %         | 0 %         | 0 %          | 0 %         | 0 %         | 0 %         | 0 %         | 0 %         | 0 %         | 91 %        | 8 %         | 0 %         | 0 %         | 0 %        |            |
| UCS                    | 0 %         | 0 %         | 0 %          | 0 %         | 0 %          | 0 %         | 0 %         | 0 %         | 0 %         | 0 %         | 0 %         | 0 %         | 0 %         | 0 %         | 0 %         | 0 %         | 0 %         | 0 %         | 0 %         | 0 %         | 0 %         | 0 %          | 0 %         | 1 %         | 0 %         | 0 %         | 1 %         | 0 %         | 0 %         | 4 %         | 77 %        | 0 %         | 0 %        |            |
| UVM                    | 0 %         | 0 %         | 0 %          | 0 %         | 0 %          | 0 %         | 0 %         | 0 %         | 0 %         | 0 %         | 0 %         | 0 %         | 0 %         | 0 %         | 0 %         | 0 %         | 0 %         | 0 %         | 0 %         | 0 %         | 0 %         | 0 %          | 0 %         | 0 %         | 0 %         | 0 %         | 0 %         | 0 %         | 0 %         | 0 %         | 0 %         | 0 %         | 98 %       | 0 %        |
| <b>Recall accuracy</b> | <b>91 %</b> | <b>96 %</b> | <b>100 %</b> | <b>97 %</b> | <b>100 %</b> | <b>91 %</b> | <b>89 %</b> | <b>95 %</b> | <b>96 %</b> | <b>88 %</b> | <b>96 %</b> | <b>96 %</b> | <b>99 %</b> | <b>98 %</b> | <b>97 %</b> | <b>97 %</b> | <b>91 %</b> | <b>99 %</b> | <b>99 %</b> | <b>96 %</b> | <b>99 %</b> | <b>100 %</b> | <b>75 %</b> | <b>92 %</b> | <b>99 %</b> | <b>94 %</b> | <b>95 %</b> | <b>99 %</b> | <b>96 %</b> | <b>91 %</b> | <b>77 %</b> | <b>98 %</b> | <b>0 %</b> | <b>0 %</b> |

% average of correctly classified cases (azure) by the 3 algorithms (SVM, NN and C5.0) per tumor type. Significant outliers (> 5% misclassified cases) are highlighted in orange. Per-tumor recall accuracy is given in red.

**Supplemental Table 4. Matrisome signatures of different cancer types**

| Adrenocortical Cancer (ACC) |                     |                                  |             |                     |                             |             |                    |                            |                        |
|-----------------------------|---------------------|----------------------------------|-------------|---------------------|-----------------------------|-------------|--------------------|----------------------------|------------------------|
| Signature genes             | Expression in tumor | Expression in rest of Pan-Cancer | P-value     | Expression in tumor | Expression in normal tissue | P-value     | Matrisome category | Fold change vs. Pan-Cancer | Fold change vs. normal |
| ADAM22                      | 8.815177922         | 7.815739107                      | 2.83E-05    | 8.815177922         | 7.86075                     | 1.85E-42    | ECM_REGULATORS     | 1.127875151                | 1.121416903            |
| ADAM32                      | 5.555628571         | 4.623915648                      | 2.94E-06    | 5.555628571         | 3.996519318                 | 8.93E-07    | ECM_REGULATORS     | 1.201498685                | 1.390116781            |
| ADAMTS3                     | 7.664607792         | 5.852472863                      | 4.13E-17    | 7.664607792         | 2.823254545                 | 4.85E-17    | ECM_REGULATORS     | 1.309635768                | 2.714812876            |
| ADAMTS7                     | 9.98702987          | 8.051686859                      | 2.44E-28    | 9.98702987          | 1.104234091                 | 4.17E-98    | ECM_REGULATORS     | 1.240364913                | 9.044304964            |
| ADAMTSL5                    | 6.998357143         | 6.224306234                      | 0.000785007 | 6.998357143         | 0.935293182                 | 2.40E-10    | ECM_REGULATORS     | 1.124359387                | 7.482527702            |
| AMH                         | 6.71878961          | 4.836009039                      | 1.02E-11    | 6.71878961          | 0.357515909                 | 1.29E-66    | SECRETED_FACTORS   | 1.38932528                 | 18.79298079            |
| ANGPT2                      | 9.451393506         | 8.571205476                      | 1.15E-06    | 9.451393506         | 0.017190909                 | 2.17E-40    | SECRETED_FACTORS   | 1.102691276                | 549.7902093            |
| ANGPTL1                     | 6.825520779         | 6.022709597                      | 0.005449909 | 6.825520779         | 0.705911364                 | 7.89E-61    | SECRETED_FACTORS   | 1.133297342                | 9.669090386            |
| ANGPTL2                     | 11.04859091         | 10.4266921                       | 0.002108585 | 11.04859091         | 10.47743068                 | 4.83E-76    | SECRETED_FACTORS   | 1.059644881                | 1.054513386            |
| ANGPTL5                     | 1.966454545         | 1.364826042                      | 0.000481296 | 1.966454545         | 0.079918182                 | 2.37E-51    | SECRETED_FACTORS   | 1.44080966                 | 24.60584689            |
| ANXA5                       | 14.28912857         | 13.37547354                      | 9.97E-15    | 14.28912857         | 0.076728409                 | 1.24E-75    | ECM_AFFILIATED     | 1.068308239                | 186.2299602            |
| ANXA6                       | 13.20392987         | 12.24751976                      | 1.23E-11    | 13.20392987         | 0.067611364                 | 5.21E-56    | ECM_AFFILIATED     | 1.078090106                | 195.2915776            |
| BDNF                        | 6.014312987         | 5.221790106                      | 0.000965588 | 6.014312987         | 2.182115909                 | 1.39E-31    | SECRETED_FACTORS   | 1.151772259                | 2.756184015            |
| C1QTNF1                     | 10.79542597         | 9.826968473                      | 6.44E-07    | 10.79542597         | 1.214376136                 | 9.47E-65    | ECM_AFFILIATED     | 1.098550993                | 8.889688829            |
| CCBE1                       | 8.591724675         | 4.721905331                      | 1.39E-40    | 8.591724675         | 1.862502273                 | 2.04E-50    | SECRETED_FACTORS   | 1.819546152                | 4.613000908            |
| COL15A1                     | 11.08727922         | 10.47593997                      | 0.015402876 | 11.08727922         | 7.035285227                 | 2.07E-74    | COLLAGENS          | 1.058356506                | 1.575953051            |
| COL15A1                     | 11.08727922         | 10.47593997                      | 0.015402876 | 11.08727922         | 7.035285227                 | 2.07E-74    | BASEMENT_MEMBRANES | 1.058356506                | 1.575953051            |
| COL27A1                     | 10.29321558         | 9.597191095                      | 0.000647837 | 10.29321558         | 0.979778409                 | 9.98E-17    | COLLAGENS          | 1.072523771                | 10.50565668            |
| COL4A3                      | 6.379018182         | 5.703849318                      | 0.04700141  | 6.379018182         | 4.126751136                 | 3.46E-88    | COLLAGENS          | 1.11837074                 | 1.545772442            |
| COL4A3                      | 6.379018182         | 5.703849318                      | 0.04700141  | 6.379018182         | 4.126751136                 | 3.46E-88    | BASEMENT_MEMBRANES | 1.11837074                 | 1.545772442            |
| CTSA                        | 15.10262597         | 12.79478354                      | 2.68E-105   | 15.10262597         | 0.294693182                 | 5.82E-80    | ECM_REGULATORS     | 1.180373699                | 51.24864403            |
| CTSD                        | 15.58845844         | 15.15320206                      | 0.00035932  | 15.58845844         | 8.252893182                 | 2.89E-60    | ECM_REGULATORS     | 1.028723723                | 1.888847717            |
| DDX26B                      | 9.465680519         | 8.163761681                      | 9.16E-19    | 9.465680519         | 1.648797727                 | 1.39E-92    | ECM_GLYCOPROTEINS  | 1.159475361                | 5.740959223            |
| DHH                         | 4.00954026          | 3.148019068                      | 6.15E-07    | 4.00954026          | 1.124777273                 | 1.29E-40    | SECRETED_FACTORS   | 1.273670894                | 3.564741533            |
| EGLN1                       | 11.63714156         | 11.20446073                      | 5.08E-07    | 11.63714156         | 7.600998864                 | 1.81E-97    | ECM_REGULATORS     | 1.038616837                | 1.531001618            |
| EGLN2                       | 11.93181169         | 11.42586543                      | 2.80E-11    | 11.93181169         | 9.702230682                 | 6.66E-98    | ECM_REGULATORS     | 1.044280782                | 1.229800865            |
| ELSPBP1                     | 2.825581818         | 0.449653093                      | 2.32E-64    | 2.825581818         | 0.149809091                 | 4.97E-54    | ECM_GLYCOPROTEINS  | 6.283915003                | 18.86121731            |
| EMID1                       | 10.61436494         | 8.135856465                      | 3.03E-31    | 10.61436494         | 8.202040909                 | 9.78E-76    | ECM_GLYCOPROTEINS  | 1.304640142                | 1.294112655            |
| EPO                         | 2.856264935         | 2.119340672                      | 0.001616851 | 2.856264935         | 2.3963625                   | 0.000121936 | SECRETED_FACTORS   | 1.347713925                | 1.191916889            |
| ESM1                        | 9.877927273         | 7.684936378                      | 2.81E-14    | 9.877927273         | 6.248171591                 | 8.98E-40    | PROTEOGLYCANS      | 1.285362271                | 1.580930858            |
| F10                         | 7.413505195         | 6.188117925                      | 3.12E-05    | 7.413505195         | 0.041297727                 | 1.59E-66    | ECM_REGULATORS     | 1.198022611                | 179.5136363            |
| FCN2                        | 6.401418182         | 1.582387752                      | 9.30E-90    | 6.401418182         | 0.146671591                 | 0.020297684 | ECM_AFFILIATED     | 4.045416917                | 43.64456772            |
| FGF11                       | 8.524801299         | 7.671139356                      | 0.000690552 | 8.524801299         | 0.404869318                 | 8.62E-58    | SECRETED_FACTORS   | 1.111282288                | 21.05568616            |
| FGF12                       | 9.102087013         | 6.275401441                      | 1.45E-25    | 9.102087013         | 2.663564773                 | 0.000636392 | SECRETED_FACTORS   | 1.450439004                | 3.417257619            |
| FNDC7                       | 1.345105195         | 0.778636964                      | 2.58E-05    | 1.345105195         | 0                           | 2.28E-67    | ECM_GLYCOPROTEINS  | 1.727512636                | Inf                    |
| GPC5                        | 3.583584416         | 2.904613583                      | 0.018573648 | 3.583584416         | 2.522506818                 | 1.03E-88    | ECM_AFFILIATED     | 1.233755993                | 1.420644095            |
| HYAL1                       | 9.114428571         | 7.567390845                      | 1.02E-09    | 9.114428571         | 3.861846591                 | 2.01E-19    | ECM_REGULATORS     | 1.204434759                | 2.360121863            |
| HYAL2                       | 11.55970649         | 11.15881723                      | 9.93E-06    | 11.55970649         | 1.068781818                 | 1.01E-152   | ECM_REGULATORS     | 1.035925784                | 10.81577764            |



|          |             |             |             |             |             |             |                    |             |             |
|----------|-------------|-------------|-------------|-------------|-------------|-------------|--------------------|-------------|-------------|
| LAMB1    | 13.00148182 | 12.22737797 | 4.22E-05    | 13.00148182 | 6.506263636 | 2.59E-63    | BASEMENT_MEMBRANES | 1.063309063 | 1.998302335 |
| LAMB1    | 13.00148182 | 12.22737797 | 4.22E-05    | 13.00148182 | 6.506263636 | 2.59E-63    | ECM_GLYCOPROTEINS  | 1.063309063 | 1.998302335 |
| LAMB2    | 13.91894805 | 12.70728354 | 1.87E-17    | 13.91894805 | 6.199969318 | 1.95E-110   | BASEMENT_MEMBRANES | 1.095351969 | 2.245002731 |
| LAMB2    | 13.91894805 | 12.70728354 | 1.87E-17    | 13.91894805 | 6.199969318 | 1.95E-110   | ECM_GLYCOPROTEINS  | 1.095351969 | 2.245002731 |
| LGALS1   | 13.43300519 | 12.68939432 | 4.32E-06    | 13.43300519 | 9.332195455 | 7.31E-148   | ECM_AFFILIATED     | 1.058600974 | 1.439426045 |
| MATN3    | 7.001937662 | 6.484673487 | 0.041961317 | 7.001937662 | 6.243238636 | 7.19E-83    | ECM_GLYCOPROTEINS  | 1.079767189 | 1.12152331  |
| MGP      | 12.48060909 | 11.8244419  | 0.029056308 | 12.48060909 | 9.700438636 | 7.47E-33    | ECM_GLYCOPROTEINS  | 1.055492445 | 1.286602551 |
| MMRN2    | 10.6691013  | 9.716885379 | 8.64E-09    | 10.6691013  | 4.095342045 | 7.55E-108   | ECM_GLYCOPROTEINS  | 1.097996002 | 2.605179538 |
| NOV      | 11.62837143 | 8.007560989 | 1.21E-58    | 11.62837143 | 8.679488636 | 1.55E-77    | ECM_GLYCOPROTEINS  | 1.452173945 | 1.339753056 |
| NTN4     | 10.30404805 | 9.744069894 | 0.019749201 | 10.30404805 | 0.432769318 | 5.65E-80    | BASEMENT_MEMBRANES | 1.057468611 | 23.80956232 |
| NTN4     | 10.30404805 | 9.744069894 | 0.019749201 | 10.30404805 | 0.432769318 | 5.65E-80    | ECM_GLYCOPROTEINS  | 1.057468611 | 23.80956232 |
| NTN5     | 4.683575325 | 3.692497166 | 2.85E-08    | 4.683575325 | 2.335186364 | 2.34E-71    | ECM_GLYCOPROTEINS  | 1.268403228 | 2.005653766 |
| NTN5     | 4.683575325 | 3.692497166 | 2.85E-08    | 4.683575325 | 2.335186364 | 2.34E-71    | BASEMENT_MEMBRANES | 1.268403228 | 2.005653766 |
| NTNG2    | 6.431781818 | 5.944061326 | 0.037233929 | 6.431781818 | 5.459398864 | 4.86E-78    | ECM_GLYCOPROTEINS  | 1.082051726 | 1.178111726 |
| NTNG2    | 6.431781818 | 5.944061326 | 0.037233929 | 6.431781818 | 5.459398864 | 4.86E-78    | BASEMENT_MEMBRANES | 1.082051726 | 1.178111726 |
| OGFOD1   | 11.28945584 | 10.46202936 | 1.87E-48    | 11.28945584 | 2.750610227 | 6.86E-26    | ECM_REGULATORS     | 1.079088527 | 4.104345913 |
| P4HTM    | 10.94929091 | 10.30303633 | 1.32E-05    | 10.94929091 | 9.048806818 | 3.01E-113   | ECM_REGULATORS     | 1.062724672 | 1.210025933 |
| PCOLCE   | 11.30038312 | 10.58330325 | 0.000448722 | 11.30038312 | 0.029690909 | 0.017629848 | ECM_GLYCOPROTEINS  | 1.067755771 | 380.6007786 |
| PCOLCE2  | 8.264458442 | 6.546396638 | 1.32E-08    | 8.264458442 | 2.041115909 | 5.09E-44    | ECM_GLYCOPROTEINS  | 1.262443891 | 4.048990263 |
| PLXNB3   | 10.1234026  | 8.331585091 | 1.78E-09    | 10.1234026  | 1.239193182 | 5.01E-65    | ECM_AFFILIATED     | 1.215063219 | 8.16934982  |
| PLXNC1   | 10.76013377 | 9.654817887 | 2.67E-09    | 10.76013377 | 1.197148864 | 1.48E-85    | ECM_AFFILIATED     | 1.114483348 | 8.988133467 |
| SDC3     | 13.81238182 | 11.8710735  | 1.27E-28    | 13.81238182 | 10.3619375  | 1.30E-62    | ECM_AFFILIATED     | 1.163532668 | 1.332992196 |
| SEMA3B   | 10.56747143 | 9.546515927 | 8.92E-06    | 10.56747143 | 4.055819318 | 8.18E-32    | ECM_AFFILIATED     | 1.106945352 | 2.605508431 |
| SEMA7A   | 9.735885714 | 8.474149491 | 3.32E-11    | 9.735885714 | 7.163461364 | 1.76E-38    | ECM_AFFILIATED     | 1.148892373 | 1.359103542 |
| SERPINA5 | 15.0531026  | 6.399061671 | 1.95E-86    | 15.0531026  | 0.026001136 | 0.004495013 | ECM_REGULATORS     | 2.352392174 | 578.9401812 |
| SERPINB6 | 12.36965844 | 11.87641585 | 2.33E-06    | 12.36965844 | 1.951163636 | 7.96E-24    | ECM_REGULATORS     | 1.041531266 | 6.339631495 |
| SERPINH1 | 13.00680519 | 12.69555323 | 0.049037869 | 13.00680519 | 5.440107955 | 1.78E-47    | ECM_REGULATORS     | 1.024516613 | 2.390909391 |
| SNED1    | 10.49388182 | 9.159522046 | 9.15E-14    | 10.49388182 | 2.744521591 | 3.83E-106   | ECM_GLYCOPROTEINS  | 1.145680066 | 3.823574153 |
| SPARC    | 16.66842727 | 15.14837562 | 2.11E-16    | 16.66842727 | 6.178789773 | 8.38E-114   | ECM_GLYCOPROTEINS  | 1.100344201 | 2.697684803 |
| SPOCK1   | 11.90525714 | 9.333476119 | 5.73E-16    | 11.90525714 | 0.083861364 | 4.16E-70    | PROTEOGLYCANS      | 1.275543751 | 141.963553  |
| SRPX     | 9.338536364 | 8.165440701 | 7.06E-06    | 9.338536364 | 5.828085227 | 1.15E-63    | ECM_GLYCOPROTEINS  | 1.143665934 | 1.602333528 |
| SSPO     | 6.929906494 | 5.541056676 | 3.28E-09    | 6.929906494 | 2.583748864 | 1.31E-132   | ECM_GLYCOPROTEINS  | 1.250647105 | 2.68211303  |
| TECTA    | 6.116345455 | 5.164499789 | 9.04E-09    | 6.116345455 | 6.007329545 | 4.39E-24    | ECM_GLYCOPROTEINS  | 1.18430549  | 1.01814715  |
| TIMP1    | 14.64268961 | 13.05371847 | 1.56E-15    | 14.64268961 | 10.69748068 | 1.33E-79    | ECM_REGULATORS     | 1.121725556 | 1.368797948 |
| TNXB     | 12.63701039 | 9.455618722 | 2.78E-44    | 12.63701039 | 9.466342045 | 1.77E-30    | ECM_GLYCOPROTEINS  | 1.336455155 | 1.33494124  |
| WFIKKN2  | 3.120831169 | 2.384223074 | 0.00158006  | 3.120831169 | 1.607265909 | 1.78E-101   | SECRETED_FACTORS   | 1.308950997 | 1.941701837 |
| WISP2    | 10.49606104 | 6.064880317 | 1.45E-41    | 10.49606104 | 9.519772727 | 2.32E-93    | ECM_GLYCOPROTEINS  | 1.730629541 | 1.102553742 |
| WNT11    | 8.400097403 | 5.991537272 | 2.56E-18    | 8.400097403 | 2.8379625   | 3.97E-32    | SECRETED_FACTORS   | 1.401993682 | 2.959904298 |
| WNT4     | 8.500555844 | 6.949631508 | 2.22E-09    | 8.500555844 | 5.422438636 | 4.53E-50    | SECRETED_FACTORS   | 1.223166413 | 1.567662894 |
| WNT6     | 5.023546753 | 3.833595139 | 1.22E-06    | 5.023546753 | 3.036595455 | 2.15E-113   | SECRETED_FACTORS   | 1.310400961 | 1.654335202 |
| VTN      | 10.94211818 | 5.254219308 | 1.13E-44    | 10.94211818 | 5.340589773 | 4.52E-49    | ECM_GLYCOPROTEINS  | 2.082539296 | 2.048859517 |
| VWA5B2   | 11.05322208 | 4.448986647 | 6.11E-120   | 11.05322208 | 3.707904545 | 2.14E-50    | ECM_GLYCOPROTEINS  | 2.484435885 | 2.980988842 |
| ZP1      | 3.594903896 | 2.113987157 | 2.01E-13    | 3.594903896 | 0.2721625   | 1.63E-41    | ECM_GLYCOPROTEINS  | 1.700532515 | 13.20866723 |
| ZP3      | 8.210411688 | 7.793445658 | 0.014129186 | 8.210411688 | 6.596473864 | 1.25E-37    | ECM_GLYCOPROTEINS  | 1.053502141 | 1.24466675  |

**Bladder Urothelial Carcinoma (BLCA)**

| Signature genes | Expression in tumor | Expression in rest of Pan-Cancer | P-value     | Expression in tumor | Expression in normal tissue | P-value     | Matrisome category | Fold change vs. Pan-Cancer | Fold change vs. normal |
|-----------------|---------------------|----------------------------------|-------------|---------------------|-----------------------------|-------------|--------------------|----------------------------|------------------------|
| A2ML1           | 8.298537793         | 3.790856356                      | 1.49E-139   | 8.298537793         | 6.286505263                 | 0.01757604  | ECM_REGULATORS     | 2.189093179                | 1.320055809            |
| ADAM10          | 12.84673052         | 12.02965498                      | 4.95E-111   | 12.84673052         | 11.92630526                 | 1.93E-05    | ECM_REGULATORS     | 1.067921776                | 1.07717606             |
| ADAM15          | 12.52005235         | 12.09285726                      | 9.50E-19    | 12.52005235         | 11.92044211                 | 0.001126945 | ECM_REGULATORS     | 1.035326233                | 1.050301007            |
| ADAM17          | 10.42462934         | 10.14128815                      | 3.46E-07    | 10.42462934         | 9.780221053                 | 0.010466552 | ECM_REGULATORS     | 1.027939369                | 1.065888929            |
| ADAM8           | 10.63341808         | 8.674758783                      | 9.31E-115   | 10.63341808         | 8.756173684                 | 3.19E-07    | ECM_REGULATORS     | 1.225788329                | 1.21439095             |
| ADAMTS20        | 2.968990376         | 1.652162821                      | 3.44E-31    | 2.968990376         | 1.117489474                 | 0.002129845 | ECM_REGULATORS     | 1.797032555                | 2.65683968             |
| ADAMTS7         | 9.163955399         | 8.032070766                      | 6.03E-50    | 9.163955399         | 8.112342105                 | 0.000658674 | ECM_REGULATORS     | 1.14092065                 | 1.12963128             |
| AGRN            | 13.90175235         | 13.21509687                      | 4.99E-26    | 13.90175235         | 12.11334737                 | 1.66E-13    | ECM_GLYCOPROTEINS  | 1.051959928                | 1.147639205            |
| AGRN            | 13.90175235         | 13.21509687                      | 4.99E-26    | 13.90175235         | 12.11334737                 | 1.66E-13    | BASEMENT_MEMBRANES | 1.051959928                | 1.147639205            |
| AMH             | 5.236961972         | 4.848428243                      | 0.001209381 | 5.236961972         | 3.027705263                 | 3.72E-05    | SECRETED_FACTORS   | 1.080136017                | 1.729680242            |
| ANXA8           | 11.65158709         | 4.785109393                      | 8.50E-275   | 11.65158709         | 9.314215789                 | 0.000516304 | ECM_AFFILIATED     | 2.434967758                | 1.250946655            |
| ANXA8L1         | 10.58020423         | 4.967643938                      | 1.29E-236   | 10.58020423         | 8.980573684                 | 0.008538186 | ECM_AFFILIATED     | 2.129823385                | 1.178121198            |
| ARTN            | 6.706534272         | 5.254881498                      | 7.79E-45    | 6.706534272         | 5.380321053                 | 0.000752408 | SECRETED_FACTORS   | 1.276248432                | 1.246493324            |
| BGLAP           | 4.35690939          | 4.108627296                      | 0.000512104 | 4.35690939          | 3.638063158                 | 0.015290344 | ECM_GLYCOPROTEINS  | 1.060429451                | 1.197590366            |
| BMP8B           | 8.295197183         | 7.764558468                      | 7.86E-10    | 8.295197183         | 6.823                       | 2.17E-05    | SECRETED_FACTORS   | 1.068341132                | 1.215769776            |
| C1QTNF6         | 10.31103357         | 9.306514889                      | 8.50E-50    | 10.31103357         | 8.121321053                 | 8.88E-11    | ECM_AFFILIATED     | 1.107937148                | 1.269625163            |
| CILP2           | 7.275610329         | 6.343231661                      | 2.99E-13    | 7.275610329         | 6.138336842                 | 0.012586779 | ECM_GLYCOPROTEINS  | 1.146987958                | 1.18527388             |
| COL7A1          | 11.97113592         | 8.794812919                      | 2.10E-154   | 11.97113592         | 9.903873684                 | 4.32E-06    | COLLAGENS          | 1.361158677                | 1.208732694            |
| CRELD2          | 10.47152183         | 10.36891182                      | 0.01382132  | 10.47152183         | 9.878978947                 | 6.36E-05    | ECM_GLYCOPROTEINS  | 1.009895929                | 1.059980175            |
| CRLF3           | 9.197746244         | 8.999731443                      | 6.14E-06    | 9.197746244         | 8.808263158                 | 0.009024251 | SECRETED_FACTORS   | 1.022002301                | 1.044217921            |
| CSF2            | 3.33911784          | 1.803928526                      | 1.50E-50    | 3.33911784          | 1.822131579                 | 0.003154082 | SECRETED_FACTORS   | 1.851025576                | 1.832533873            |
| CST1            | 7.005861268         | 4.974311134                      | 3.28E-23    | 7.005861268         | 1.745789474                 | 3.94E-10    | ECM_REGULATORS     | 1.408408336                | 4.013004645            |
| CST4            | 2.762000469         | 2.18324754                       | 5.14E-06    | 2.762000469         | 0.305052632                 | 4.39E-05    | ECM_REGULATORS     | 1.265088094                | 9.054176832            |
| CST6            | 7.884665023         | 4.590093753                      | 1.06E-93    | 7.884665023         | 4.2427                      | 6.03E-08    | ECM_REGULATORS     | 1.717756858                | 1.858407388            |
| CSTB            | 14.09110117         | 12.46795209                      | 2.03E-186   | 14.09110117         | 13.17565789                 | 0.00142052  | ECM_REGULATORS     | 1.130185701                | 1.069479891            |
| CSTL1           | 1.070446714         | 0.531965836                      | 1.95E-28    | 1.070446714         | 0.284042105                 | 0.005122323 | ECM_REGULATORS     | 2.012247106                | 3.768619841            |
| CTSC            | 12.55440023         | 12.06247845                      | 1.00E-10    | 12.55440023         | 11.67459474                 | 0.003377666 | ECM_REGULATORS     | 1.040781153                | 1.075360689            |
| CTSV            | 7.726790376         | 7.038075392                      | 1.68E-08    | 7.726790376         | 4.742310526                 | 1.06E-07    | ECM_REGULATORS     | 1.097855585                | 1.62933033             |
| CXCL10          | 8.583020892         | 8.216557989                      | 0.005029977 | 8.583020892         | 6.800926316                 | 0.007449772 | SECRETED_FACTORS   | 1.044600538                | 1.262037036            |
| CXCL11          | 6.708001408         | 6.317128309                      | 0.00255089  | 6.708001408         | 4.597552632                 | 0.002263282 | SECRETED_FACTORS   | 1.061875124                | 1.459037437            |
| FBN2            | 7.915163146         | 7.06951108                       | 2.92E-11    | 7.915163146         | 5.910757895                 | 0.001588643 | ECM_GLYCOPROTEINS  | 1.119619597                | 1.339111377            |
| FGF11           | 8.668219249         | 7.455610263                      | 1.17E-29    | 8.668219249         | 6.440526316                 | 9.36E-09    | SECRETED_FACTORS   | 1.162643827                | 1.345886784            |
| FGF22           | 2.83116831          | 2.463297225                      | 5.50E-07    | 2.83116831          | 1.718405263                 | 0.002829261 | SECRETED_FACTORS   | 1.149340925                | 1.647555656            |
| GPC2            | 6.45205446          | 5.528092229                      | 2.36E-18    | 6.45205446          | 4.052568421                 | 1.76E-07    | ECM_AFFILIATED     | 1.167139438                | 1.592090198            |
| IBSP            | 3.764347887         | 3.203609632                      | 2.29E-05    | 3.764347887         | 0.972478947                 | 1.48E-08    | ECM_GLYCOPROTEINS  | 1.175033265                | 3.870878539            |
| IGFBP3          | 14.281373           | 12.2994363                       | 7.27E-78    | 14.281373           | 13.22118947                 | 0.020110549 | ECM_GLYCOPROTEINS  | 1.161140451                | 1.080188211            |
| KCP             | 6.800561268         | 5.804015945                      | 9.08E-18    | 6.800561268         | 5.564557895                 | 0.002300065 | ECM_GLYCOPROTEINS  | 1.171699274                | 1.222120678            |
| LAMC2           | 11.65576643         | 9.673943753                      | 1.09E-25    | 11.65576643         | 9.537847368                 | 0.00011555  | BASEMENT_MEMBRANES | 1.204861919                | 1.2220542              |
| LAMC2           | 11.65576643         | 9.673943753                      | 1.09E-25    | 11.65576643         | 9.537847368                 | 0.00011555  | ECM_GLYCOPROTEINS  | 1.204861919                | 1.2220542              |
| MFAP2           | 10.59084859         | 8.904379745                      | 1.85E-35    | 10.59084859         | 9.144368421                 | 0.000324495 | ECM_GLYCOPROTEINS  | 1.189397678                | 1.158182622            |
| MMP1            | 9.425970188         | 6.509346419                      | 6.66E-53    | 9.425970188         | 6.772257895                 | 0.000123623 | ECM_REGULATORS     | 1.448067069                | 1.391850448            |
| MMP11           | 11.07585939         | 9.817103461                      | 7.49E-19    | 11.07585939         | 7.310157895                 | 8.34E-11    | ECM_REGULATORS     | 1.128220705                | 1.515132717            |

|                 |             |             |           |             |             |             |                   |             |             |
|-----------------|-------------|-------------|-----------|-------------|-------------|-------------|-------------------|-------------|-------------|
| <b>MMP13</b>    | 7.082378404 | 3.879871474 | 1.21E-64  | 7.082378404 | 4.106521053 | 0.000156658 | ECM_REGULATORS    | 1.825415726 | 1.724666284 |
| <b>MMP14</b>    | 13.92918075 | 12.80056123 | 6.60E-39  | 13.92918075 | 13.11161579 | 0.000477349 | ECM_REGULATORS    | 1.088169534 | 1.062354249 |
| <b>MUC1</b>     | 11.91359061 | 10.78351914 | 1.52E-11  | 11.91359061 | 10.87316316 | 0.04013872  | ECM_AFFILIATED    | 1.104796166 | 1.095687652 |
| <b>NGLY1</b>    | 10.23802629 | 9.998852786 | 2.48E-17  | 10.23802629 | 9.861       | 0.01289566  | ECM_REGULATORS    | 1.023920095 | 1.038234083 |
| <b>OGFOD2</b>   | 9.251956808 | 9.057151916 | 5.19E-09  | 9.251956808 | 8.429194737 | 2.32E-09    | ECM_REGULATORS    | 1.021508405 | 1.097608621 |
| <b>PI3</b>      | 7.259658216 | 5.227828624 | 1.29E-23  | 7.259658216 | 4.734778947 | 0.01322405  | ECM_REGULATORS    | 1.388656503 | 1.533262333 |
| <b>PLAU</b>     | 11.96070164 | 10.34115838 | 5.43E-57  | 11.96070164 | 10.29175263 | 3.55E-05    | ECM_REGULATORS    | 1.156611397 | 1.162163732 |
| <b>PLXNA1</b>   | 12.07676033 | 11.39477878 | 8.98E-28  | 12.07676033 | 10.85537895 | 2.39E-09    | ECM_AFFILIATED    | 1.059850355 | 1.112513933 |
| <b>PLXNA3</b>   | 10.97967207 | 10.76621741 | 8.71E-05  | 10.97967207 | 10.06305263 | 3.96E-06    | ECM_AFFILIATED    | 1.019826337 | 1.091087612 |
| <b>PLXNB1</b>   | 12.23144671 | 11.86658829 | 3.93E-09  | 12.23144671 | 11.67024737 | 0.015825355 | ECM_AFFILIATED    | 1.0307467   | 1.048088042 |
| <b>PLXNB2</b>   | 13.88605469 | 13.65677356 | 2.09E-07  | 13.88605469 | 13.33291579 | 0.00062951  | ECM_AFFILIATED    | 1.016788821 | 1.041486717 |
| <b>PODNL1</b>   | 7.170835446 | 6.502546702 | 1.16E-09  | 7.170835446 | 6.005647368 | 0.005747984 | PROTEOGLYCANS     | 1.102773386 | 1.1940154   |
| <b>SDC1</b>     | 15.07955986 | 12.08857194 | 4.18E-127 | 15.07955986 | 13.05611053 | 3.91E-06    | ECM_AFFILIATED    | 1.247422767 | 1.15498102  |
| <b>SEMA3F</b>   | 12.19489437 | 10.42783493 | 3.47E-85  | 12.19489437 | 11.19094211 | 0.000843151 | ECM_AFFILIATED    | 1.169456023 | 1.089711148 |
| <b>SEMA4A</b>   | 10.42443779 | 9.607952449 | 2.77E-23  | 10.42443779 | 9.666847368 | 0.007532765 | ECM_AFFILIATED    | 1.084980161 | 1.078369958 |
| <b>SERPINB7</b> | 3.849569014 | 2.707530387 | 9.10E-16  | 3.849569014 | 1.931789474 | 0.011601618 | ECM_REGULATORS    | 1.421800853 | 1.992747691 |
| <b>SERPINH1</b> | 13.24035986 | 12.63826873 | 3.55E-18  | 13.24035986 | 12.50153158 | 0.000350843 | ECM_REGULATORS    | 1.047640317 | 1.059099021 |
| <b>ST14</b>     | 13.13931338 | 11.50465816 | 2.75E-36  | 13.13931338 | 11.02842105 | 1.24E-09    | ECM_REGULATORS    | 1.142086379 | 1.191404764 |
| <b>TGM1</b>     | 6.711450469 | 5.825268317 | 4.29E-15  | 6.711450469 | 5.356357895 | 0.02186771  | ECM_REGULATORS    | 1.152127268 | 1.252987683 |
| <b>TINAGL1</b>  | 13.15127606 | 10.43268998 | 2.33E-160 | 13.15127606 | 11.80057368 | 0.000259702 | ECM_GLYCOPROTEINS | 1.260583424 | 1.114460738 |
| <b>WNT2</b>     | 6.729144366 | 5.484353537 | 1.46E-16  | 6.729144366 | 5.331673684 | 0.007961143 | SECRETED_FACTORS  | 1.226971296 | 1.262107317 |
| <b>WNT7B</b>    | 10.77480469 | 6.71497389  | 3.75E-117 | 10.77480469 | 8.947252632 | 0.000455452 | SECRETED_FACTORS  | 1.604593684 | 1.204258462 |
| <b>VWA9</b>     | 10.72438122 | 10.62042746 | 5.26E-06  | 10.72438122 | 10.28326316 | 5.17E-06    | ECM_GLYCOPROTEINS | 1.009788096 | 1.042896701 |
| <b>XCL1</b>     | 5.347624648 | 4.009227797 | 2.64E-41  | 5.347624648 | 4.1363      | 0.015620247 | SECRETED_FACTORS  | 1.333829086 | 1.292852222 |
| <b>ZP1</b>      | 3.093282394 | 2.134271343 | 1.16E-27  | 3.093282394 | 2.069978947 | 0.024657011 | ECM_GLYCOPROTEINS | 1.44933886  | 1.494354519 |
| <b>ZP3</b>      | 8.14135892  | 7.723563354 | 2.02E-08  | 8.14135892  | 6.9137      | 5.36E-05    | ECM_GLYCOPROTEINS | 1.054093628 | 1.177569018 |

**Breast Invasive Carcinoma (BRCA)**

| Signature genes | Expression in tumor | Expression in rest of Pan-Cancer | P-value     | Expression in tumor | Expression in normal tissue | P-value     | Matrisome category | Fold change vs. Pan-Cancer | Fold change vs. normal |
|-----------------|---------------------|----------------------------------|-------------|---------------------|-----------------------------|-------------|--------------------|----------------------------|------------------------|
| ADAM12          | 11.19590792         | 8.101521606                      | 0           | 11.19590792         | 10.1097823                  | 2.37E-13    | ECM_REGULATORS     | 1.381951251                | 1.107433136            |
| ADAM15          | 12.79624818         | 12.08449769                      | 2.66E-130   | 12.79624818         | 12.21976726                 | 8.01E-14    | ECM_REGULATORS     | 1.058897814                | 1.047176097            |
| ADAM19          | 9.231910561         | 9.03442828                       | 7.44E-05    | 9.231910561         | 7.865879646                 | 4.47E-31    | ECM_REGULATORS     | 1.021858858                | 1.173665372            |
| ADAM8           | 8.995519637         | 8.863581111                      | 0.014808551 | 8.995519637         | 7.071266372                 | 3.64E-46    | ECM_REGULATORS     | 1.014885465                | 1.272122865            |
| ADAMDEC1        | 6.726510809         | 6.040641488                      | 4.02E-16    | 6.726510809         | 4.366595575                 | 3.92E-25    | ECM_REGULATORS     | 1.113542464                | 1.540447402            |
| ADAMTS12        | 10.0917948          | 7.748959429                      | 2.68E-247   | 10.0917948          | 9.522889381                 | 9.89E-06    | ECM_REGULATORS     | 1.302341933                | 1.059740841            |
| ADAMTS14        | 7.025099917         | 6.658865499                      | 1.06E-08    | 7.025099917         | 4.002469027                 | 1.13E-67    | ECM_REGULATORS     | 1.054999522                | 1.755191576            |
| ADAMTS19        | 4.078201073         | 2.049047957                      | 2.57E-144   | 4.078201073         | 3.520021239                 | 0.022404181 | ECM_REGULATORS     | 1.99029069                 | 1.15857286             |
| ADAMTS2         | 11.13285355         | 9.291421757                      | 1.48E-195   | 11.13285355         | 10.8693115                  | 0.033130686 | ECM_REGULATORS     | 1.198186224                | 1.024246434            |
| ADAMTS4         | 9.926613119         | 9.072732518                      | 6.73E-50    | 9.926613119         | 8.837130088                 | 1.84E-17    | ECM_REGULATORS     | 1.094115042                | 1.123284711            |
| ADAMTS6         | 6.533623845         | 5.670886954                      | 2.09E-57    | 6.533623845         | 5.649369912                 | 8.14E-14    | ECM_REGULATORS     | 1.152134384                | 1.156522576            |
| AEBP1           | 14.11790116         | 12.64730093                      | 5.66E-137   | 14.11790116         | 13.32998496                 | 3.52E-10    | ECM_GLYCOPROTEINS  | 1.116277792                | 1.059108559            |
| ANXA9           | 9.221688201         | 7.158920787                      | 5.01E-250   | 9.221688201         | 7.721292035                 | 6.92E-15    | ECM_AFFILIATED     | 1.288139438                | 1.194319313            |
| ARTN            | 6.027754455         | 5.44294193                       | 9.81E-19    | 6.027754455         | 3.700948673                 | 1.21E-35    | SECRETED_FACTORS   | 1.107444197                | 1.628705229            |
| ASPN            | 10.85226584         | 8.067378749                      | 9.21E-310   | 10.85226584         | 9.606749558                 | 6.14E-11    | PROTEOGLYCANS      | 1.345203464                | 1.129650125            |
| ASTL            | 2.739997277         | 1.835842965                      | 6.14E-84    | 2.739997277         | 1.906823894                 | 1.34E-09    | ECM_REGULATORS     | 1.4925009                  | 1.436943016            |
| BGN             | 14.15985974         | 13.10687878                      | 6.89E-68    | 14.15985974         | 12.11389115                 | 5.61E-58    | PROTEOGLYCANS      | 1.08033804                 | 1.168894417            |
| BMP8A           | 4.429501073         | 4.227535849                      | 0.000477827 | 4.429501073         | 2.102295575                 | 8.48E-49    | SECRETED_FACTORS   | 1.047773746                | 2.106983016            |
| C1QTNF3         | 8.956812211         | 7.80146041                       | 1.55E-86    | 8.956812211         | 8.403404425                 | 0.000246848 | ECM_AFFILIATED     | 1.148094298                | 1.065855189            |
| C1QTNF5         | 9.492984241         | 9.318128108                      | 0.000454985 | 9.492984241         | 8.976244248                 | 3.90E-06    | ECM_AFFILIATED     | 1.018765157                | 1.057567506            |
| C1QTNF6         | 10.15712583         | 9.294827073                      | 4.40E-94    | 10.15712583         | 8.323367257                 | 1.41E-56    | ECM_AFFILIATED     | 1.092771898                | 1.220314509            |
| CBLN2           | 4.329558086         | 2.674656668                      | 4.53E-90    | 4.329558086         | 2.476847788                 | 8.31E-09    | SECRETED_FACTORS   | 1.618734149                | 1.748011366            |
| CCL11           | 4.508605776         | 3.972758329                      | 8.09E-10    | 4.508605776         | 1.525281416                 | 9.88E-59    | SECRETED_FACTORS   | 1.134880454                | 2.955917333            |
| CCL3L3          | 5.792204868         | 5.477302221                      | 8.97E-08    | 5.792204868         | 5.457149558                 | 0.041997464 | SECRETED_FACTORS   | 1.05749229                 | 1.061397495            |
| CHRD            | 8.816179455         | 7.498267817                      | 1.22E-105   | 8.816179455         | 8.403622124                 | 0.015938586 | SECRETED_FACTORS   | 1.175762145                | 1.049092799            |
| CILP2           | 8.208411386         | 6.093446911                      | 2.58E-169   | 8.208411386         | 5.573426549                 | 2.11E-53    | ECM_GLYCOPROTEINS  | 1.347088357                | 1.472776453            |
| CLEC2D          | 8.61132797          | 8.129157606                      | 1.91E-34    | 8.61132797          | 8.396769027                 | 0.019864075 | ECM_AFFILIATED     | 1.059313694                | 1.02555256             |
| CLEC3A          | 5.26575198          | 0.845965876                      | 0           | 5.26575198          | 3.778562832                 | 0.003093898 | ECM_AFFILIATED     | 6.224544192                | 1.393585925            |
| CLEC4C          | 1.534906353         | 1.075521466                      | 2.80E-27    | 1.534906353         | 1.126680531                 | 0.00789767  | ECM_AFFILIATED     | 1.427127585                | 1.362326153            |
| CLEC5A          | 6.987062129         | 6.123436604                      | 1.50E-38    | 6.987062129         | 4.417784071                 | 3.15E-50    | ECM_AFFILIATED     | 1.141036085                | 1.581576197            |
| CLEC7A          | 8.064476733         | 7.731135127                      | 5.34E-10    | 8.064476733         | 7.32900354                  | 5.52E-09    | ECM_AFFILIATED     | 1.043116774                | 1.100351049            |
| COL10A1         | 10.71988729         | 6.345894167                      | 0           | 10.71988729         | 4.555057522                 | 2.14E-97    | COLLAGENS          | 1.689263485                | 2.353403276            |
| COL11A1         | 10.98253185         | 6.949527019                      | 5.10E-278   | 10.98253185         | 6.218397345                 | 1.01E-62    | COLLAGENS          | 1.580327959                | 1.766135427            |
| COL12A1         | 13.67459901         | 10.98841381                      | 2.24E-272   | 13.67459901         | 12.72750177                 | 2.64E-11    | COLLAGENS          | 1.244456138                | 1.074413444            |
| COL1A1          | 17.03852649         | 14.43435341                      | 6.27E-178   | 17.03852649         | 14.88682301                 | 2.66E-37    | COLLAGENS          | 1.180414945                | 1.144537453            |
| COL1A2          | 16.69530239         | 14.2028013                       | 1.11E-218   | 16.69530239         | 15.43880796                 | 7.99E-17    | COLLAGENS          | 1.175493625                | 1.081385456            |
| COL24A1         | 6.21422632          | 5.215554943                      | 9.82E-60    | 6.21422632          | 5.11490177                  | 8.81E-23    | COLLAGENS          | 1.191479409                | 1.214925838            |
| COL3A1          | 16.56689051         | 13.96613871                      | 2.83E-193   | 16.56689051         | 15.33594779                 | 2.59E-15    | COLLAGENS          | 1.186218386                | 1.080265187            |
| COL5A1          | 13.41435545         | 11.60679847                      | 1.30E-134   | 13.41435545         | 11.80284602                 | 7.73E-30    | COLLAGENS          | 1.155732606                | 1.136535665            |
| COL5A2          | 13.52663259         | 11.24220768                      | 2.07E-265   | 13.52663259         | 12.10333186                 | 1.84E-23    | COLLAGENS          | 1.20320074                 | 1.117595779            |
| COL6A1          | 14.25884546         | 13.08448322                      | 2.69E-112   | 14.25884546         | 13.96310708                 | 0.010616075 | COLLAGENS          | 1.089752283                | 1.021179984            |
| COL6A1          | 14.25884546         | 13.08448322                      | 2.69E-112   | 14.25884546         | 13.96310708                 | 0.010616075 | BASEMENT_MEMBRANES | 1.089752283                | 1.021179984            |

|         |             |             |             |             |             |             |                    |             |             |
|---------|-------------|-------------|-------------|-------------|-------------|-------------|--------------------|-------------|-------------|
| COL6A3  | 14.9025684  | 12.33135763 | 3.29E-219   | 14.9025684  | 14.35101062 | 3.24E-05    | COLLAGENS          | 1.208509951 | 1.038433375 |
| COL6A3  | 14.9025684  | 12.33135763 | 3.29E-219   | 14.9025684  | 14.35101062 | 3.24E-05    | BASEMENT_MEMBRANES | 1.208509951 | 1.038433375 |
| COL8A1  | 11.25208771 | 9.600373445 | 1.42E-93    | 11.25208771 | 10.37454602 | 1.70E-09    | COLLAGENS          | 1.172046876 | 1.084586033 |
| COL9A2  | 8.980872937 | 8.720633941 | 6.77E-05    | 8.980872937 | 8.568457522 | 0.012601236 | COLLAGENS          | 1.029841752 | 1.048131815 |
| COMP    | 10.73491832 | 6.775507407 | 1.28E-271   | 10.73491832 | 6.659666372 | 1.14E-58    | ECM_GLYCOPROTEINS  | 1.584371129 | 1.611930346 |
| CPN2    | 2.953881353 | 2.172646889 | 4.72E-17    | 2.953881353 | 2.144440708 | 2.07E-07    | ECM_REGULATORS     | 1.359577282 | 1.377460026 |
| CST1    | 6.66099571  | 4.906725585 | 6.61E-45    | 6.66099571  | 1.230035398 | 4.82E-51    | ECM_REGULATORS     | 1.357523586 | 5.415287819 |
| CST11   | 0.390252888 | 0.184632884 | 5.70E-26    | 0.390252888 | 0.199652212 | 0.033106205 | ECM_REGULATORS     | 2.113669457 | 1.954663478 |
| CST2    | 4.861715842 | 3.441381013 | 2.21E-61    | 4.861715842 | 1.595419469 | 7.98E-39    | ECM_REGULATORS     | 1.412722341 | 3.047296298 |
| CST4    | 3.596259571 | 1.970130491 | 1.28E-99    | 3.596259571 | 0.398417699 | 3.58E-27    | ECM_REGULATORS     | 1.825391561 | 9.026354951 |
| CST5    | 2.551666337 | 1.531283838 | 8.85E-50    | 2.551666337 | 0.572423894 | 2.47E-10    | ECM_REGULATORS     | 1.666357518 | 4.457651688 |
| CST6    | 5.603691089 | 4.902758889 | 3.75E-12    | 5.603691089 | 4.184513274 | 3.75E-12    | ECM_REGULATORS     | 1.142966892 | 1.339150033 |
| CST9L   | 1.381228713 | 0.141443978 | 0           | 1.381228713 | 0.780349558 | 0.001502618 | ECM_REGULATORS     | 9.765199821 | 1.77001281  |
| CTHRC1  | 11.12223218 | 8.809608399 | 2.07E-203   | 11.12223218 | 8.909548673 | 6.80E-51    | ECM_GLYCOPROTEINS  | 1.26251153  | 1.248349674 |
| CTSZ    | 12.90454992 | 12.82921038 | 0.025801514 | 12.90454992 | 12.7363885  | 0.017109774 | ECM_REGULATORS     | 1.0058725   | 1.013203226 |
| CXCL10  | 9.270857096 | 8.278241186 | 8.30E-34    | 9.270857096 | 6.749662832 | 1.09E-34    | SECRETED_FACTORS   | 1.119906619 | 1.373528919 |
| CXCL11  | 7.374035479 | 6.360275914 | 1.22E-35    | 7.374035479 | 4.805169912 | 1.47E-32    | SECRETED_FACTORS   | 1.159389243 | 1.534604523 |
| CXCL13  | 7.47847302  | 6.199152873 | 1.64E-35    | 7.47847302  | 5.382593805 | 7.18E-12    | SECRETED_FACTORS   | 1.206370156 | 1.389380899 |
| CXCL9   | 10.04744134 | 8.820906361 | 3.01E-42    | 10.04744134 | 8.153427434 | 3.21E-16    | SECRETED_FACTORS   | 1.139048633 | 1.232296653 |
| ECM1    | 10.89193003 | 9.933208323 | 3.38E-57    | 10.89193003 | 9.980565487 | 8.28E-08    | ECM_GLYCOPROTEINS  | 1.096516823 | 1.091313919 |
| EGLN2   | 11.56296997 | 11.41214976 | 1.06E-13    | 11.56296997 | 11.02280973 | 3.34E-11    | ECM_REGULATORS     | 1.013215758 | 1.049003861 |
| EGLN3   | 9.838346617 | 9.588150307 | 0.000550771 | 9.838346617 | 8.81889646  | 2.20E-12    | ECM_REGULATORS     | 1.026094325 | 1.115598381 |
| EMILIN1 | 10.94591188 | 10.63250712 | 3.07E-08    | 10.94591188 | 10.58356814 | 0.004561431 | ECM_GLYCOPROTEINS  | 1.029476093 | 1.034236444 |
| EPO     | 2.382876815 | 2.091021251 | 2.90E-06    | 2.382876815 | 1.449641593 | 9.31E-07    | SECRETED_FACTORS   | 1.139575609 | 1.643769623 |
| EPYC    | 4.802066914 | 2.286165035 | 6.81E-199   | 4.802066914 | 1.204872566 | 1.46E-40    | PROTEOGLYCANS      | 2.100490052 | 3.985539258 |
| F12     | 7.398298927 | 7.213070739 | 0.014121616 | 7.398298927 | 4.965949558 | 1.62E-47    | ECM_REGULATORS     | 1.025679519 | 1.489805493 |
| F7      | 6.188980528 | 3.564751849 | 3.47E-189   | 6.188980528 | 4.734643363 | 5.94E-09    | ECM_REGULATORS     | 1.736160269 | 1.307169316 |
| FBN2    | 7.363150248 | 7.174418415 | 0.017468006 | 7.363150248 | 5.314756637 | 6.84E-28    | ECM_GLYCOPROTEINS  | 1.02630622  | 1.385416257 |
| FN1     | 16.61292409 | 14.97522479 | 2.13E-117   | 16.61292409 | 14.16118673 | 2.15E-50    | ECM_GLYCOPROTEINS  | 1.109360582 | 1.173130784 |
| FNDC1   | 10.55541436 | 7.880639849 | 5.32E-182   | 10.55541436 | 8.990941593 | 5.46E-20    | ECM_GLYCOPROTEINS  | 1.339410829 | 1.174005442 |
| GPC4    | 10.52031955 | 9.860518846 | 6.49E-23    | 10.52031955 | 9.99779469  | 6.28E-05    | ECM_AFFILIATED     | 1.066913386 | 1.052264012 |
| GREM1   | 10.02564703 | 7.748169747 | 1.19E-101   | 10.02564703 | 9.21980885  | 5.34E-06    | ECM_AFFILIATED     | 1.293937453 | 1.087402916 |
| HPX     | 7.685981353 | 4.633679116 | 5.00E-235   | 7.685981353 | 6.819457522 | 0.000210855 | ECM_AFFILIATED     | 1.658721107 | 1.127066387 |
| HTRA3   | 11.1885882  | 9.009517531 | 4.55E-198   | 11.1885882  | 10.80110354 | 0.00963821  | ECM_REGULATORS     | 1.241863192 | 1.035874544 |
| HTRA4   | 3.63617104  | 3.344919191 | 7.39E-07    | 3.63617104  | 2.610073451 | 1.87E-12    | ECM_REGULATORS     | 1.08707291  | 1.393129775 |
| IBSP    | 4.822415842 | 3.067219224 | 5.81E-107   | 4.822415842 | 0.582378761 | 2.49E-64    | ECM_GLYCOPROTEINS  | 1.572243615 | 8.280548955 |
| IGFALS  | 5.341866007 | 4.327864173 | 1.79E-40    | 5.341866007 | 3.742167257 | 5.38E-12    | ECM_GLYCOPROTEINS  | 1.234296132 | 1.427479223 |
| ITIH6   | 6.644765429 | 2.185747159 | 0           | 6.644765429 | 5.766893805 | 6.35E-05    | ECM_REGULATORS     | 3.040043036 | 1.152226078 |
| KAZALD1 | 8.170065347 | 7.313407137 | 8.21E-58    | 8.170065347 | 7.472739823 | 5.69E-07    | ECM_REGULATORS     | 1.11713531  | 1.093315911 |
| LGALS8  | 12.09642269 | 11.18617164 | 9.45E-261   | 12.09642269 | 11.81871504 | 0.000294775 | ECM_AFFILIATED     | 1.081372884 | 1.023497279 |
| LMAN1   | 12.64168894 | 12.34899995 | 5.67E-31    | 12.64168894 | 12.46526106 | 0.004513533 | ECM_AFFILIATED     | 1.023701433 | 1.014153565 |
| LOXL1   | 10.53321056 | 9.065306922 | 1.42E-135   | 10.53321056 | 9.360351327 | 6.94E-26    | ECM_REGULATORS     | 1.161925421 | 1.125300771 |
| LOXL2   | 10.98485809 | 10.06401344 | 1.56E-67    | 10.98485809 | 10.67768761 | 0.002987589 | ECM_REGULATORS     | 1.091498749 | 1.028767509 |
| LRG1    | 9.093024175 | 8.25288841  | 2.79E-20    | 9.093024175 | 8.268236283 | 0.001134478 | ECM_GLYCOPROTEINS  | 1.101798997 | 1.099753788 |
| MATN3   | 8.880825495 | 6.175853337 | 0           | 8.880825495 | 6.888699115 | 8.33E-31    | ECM_GLYCOPROTEINS  | 1.437991644 | 1.289187602 |
| MEPE    | 1.384993152 | 0.961013164 | 3.53E-20    | 1.384993152 | 0.745264602 | 2.30E-05    | ECM_GLYCOPROTEINS  | 1.441180208 | 1.858391165 |
| MFAP2   | 10.33492979 | 8.962394997 | 2.08E-62    | 10.33492979 | 8.470486726 | 2.38E-39    | ECM_GLYCOPROTEINS  | 1.153143751 | 1.220110499 |



|           |             |             |             |             |             |             |                    |             |             |
|-----------|-------------|-------------|-------------|-------------|-------------|-------------|--------------------|-------------|-------------|
| MMP10     | 5.356848185 | 4.605390232 | 1.25E-11    | 5.356848185 | 3.10069646  | 2.46E-20    | ECM_REGULATORS     | 1.163169225 | 1.727627407 |
| MMP11     | 12.44898465 | 9.670908582 | 6.63E-235   | 12.44898465 | 7.228453097 | 6.74E-98    | ECM_REGULATORS     | 1.287261124 | 1.722219745 |
| MMP13     | 7.764369967 | 3.946611903 | 1.22E-222   | 7.764369967 | 2.410757522 | 1.01E-65    | ECM_REGULATORS     | 1.96735077  | 3.220717926 |
| MMP14     | 13.5252085  | 12.86777279 | 8.58E-36    | 13.5252085  | 12.61523274 | 2.38E-17    | ECM_REGULATORS     | 1.051091647 | 1.072133093 |
| MMP17     | 7.250313531 | 6.509288442 | 3.34E-26    | 7.250313531 | 6.794683186 | 0.001449483 | ECM_REGULATORS     | 1.113841182 | 1.067056893 |
| MMP25     | 6.704895215 | 6.279096507 | 1.09E-20    | 6.704895215 | 6.148525664 | 0.000294572 | ECM_REGULATORS     | 1.067812098 | 1.090488286 |
| MMP3      | 7.705482096 | 4.169840539 | 5.49E-205   | 7.705482096 | 5.800159292 | 5.54E-18    | ECM_REGULATORS     | 1.847908097 | 1.32849491  |
| MMP8      | 2.153475743 | 1.971380733 | 0.008960725 | 2.153475743 | 1.63380177  | 0.006195267 | ECM_REGULATORS     | 1.092369275 | 1.318076515 |
| MMP9      | 10.48125355 | 9.226251439 | 3.54E-48    | 10.48125355 | 8.034178761 | 7.38E-30    | ECM_REGULATORS     | 1.136025136 | 1.304583064 |
| MUC1      | 13.19909579 | 10.57323003 | 1.40E-154   | 13.19909579 | 11.04934513 | 1.65E-23    | ECM_AFFILIATED     | 1.248350387 | 1.194559101 |
| MUC19     | 3.101980693 | 1.334942221 | 1.22E-201   | 3.101980693 | 2.287080531 | 0.002309737 | ECM_AFFILIATED     | 2.323681613 | 1.356305845 |
| MUC5B     | 8.942969472 | 5.717493283 | 3.02E-121   | 8.942969472 | 8.176951327 | 0.02555344  | ECM_AFFILIATED     | 1.564141667 | 1.093680164 |
| MXRA5     | 13.23535982 | 10.75513288 | 2.64E-235   | 13.23535982 | 12.54451327 | 5.01E-08    | ECM_GLYCOPROTEINS  | 1.230608674 | 1.05507161  |
| NELL2     | 8.656212211 | 7.734769057 | 5.46E-29    | 8.656212211 | 7.44449469  | 1.47E-07    | ECM_GLYCOPROTEINS  | 1.119130015 | 1.162766927 |
| NID2      | 10.24610561 | 9.071591817 | 2.69E-89    | 10.24610561 | 9.864915044 | 0.001710855 | BASEMENT_MEMBRANES | 1.129471632 | 1.038641039 |
| NID2      | 10.24610561 | 9.071591817 | 2.69E-89    | 10.24610561 | 9.864915044 | 0.001710855 | ECM_GLYCOPROTEINS  | 1.129471632 | 1.038641039 |
| NPNT      | 11.77287764 | 10.01168541 | 3.34E-104   | 11.77287764 | 10.62509027 | 3.54E-11    | ECM_GLYCOPROTEINS  | 1.17591366  | 1.108026129 |
| NPNT      | 11.77287764 | 10.01168541 | 3.34E-104   | 11.77287764 | 10.62509027 | 3.54E-11    | BASEMENT_MEMBRANES | 1.17591366  | 1.108026129 |
| OVGP1     | 6.545292822 | 6.288373477 | 3.82E-07    | 6.545292822 | 6.278546018 | 0.015834342 | ECM_AFFILIATED     | 1.040856248 | 1.042485442 |
| P4HA1     | 11.2767755  | 11.12019723 | 2.66E-07    | 11.2767755  | 10.62365929 | 1.40E-16    | ECM_REGULATORS     | 1.01408053  | 1.061477518 |
| P4HA2     | 10.8671066  | 10.6819488  | 2.33E-05    | 10.8671066  | 10.36848584 | 2.40E-13    | ECM_REGULATORS     | 1.01733371  | 1.048090027 |
| P4HA3     | 7.752185891 | 6.198792765 | 7.98E-158   | 7.752185891 | 5.441364602 | 4.49E-51    | ECM_REGULATORS     | 1.250596073 | 1.424676797 |
| P4HTM     | 10.39121955 | 10.29687822 | 0.017261499 | 10.39121955 | 9.792789381 | 3.37E-10    | ECM_REGULATORS     | 1.00916213  | 1.061109266 |
| PLAU      | 11.14789464 | 10.51843826 | 1.54E-22    | 11.14789464 | 10.34973274 | 2.06E-11    | ECM_REGULATORS     | 1.05984314  | 1.077119083 |
| PLXNA3    | 11.03704348 | 10.69795725 | 2.85E-24    | 11.03704348 | 10.14113717 | 6.08E-34    | ECM_AFFILIATED     | 1.031696353 | 1.088343772 |
| PLXNC1    | 10.24305536 | 9.587126836 | 3.52E-40    | 10.24305536 | 9.93779646  | 0.003134786 | ECM_AFFILIATED     | 1.068417633 | 1.030716961 |
| PODNL1    | 8.022631188 | 6.462424097 | 8.55E-123   | 8.022631188 | 7.432354867 | 1.63E-05    | PROTEOGLYCANS      | 1.241427531 | 1.079419825 |
| POSTN     | 14.51958952 | 10.38214502 | 0           | 14.51958952 | 12.87884602 | 8.10E-24    | ECM_GLYCOPROTEINS  | 1.398515383 | 1.127398332 |
| PXDNL     | 5.735522442 | 4.37468372  | 7.78E-109   | 5.735522442 | 5.006071681 | 0.000226227 | ECM_GLYCOPROTEINS  | 1.311071339 | 1.145713207 |
| SDC1      | 13.08792186 | 12.38498878 | 6.79E-19    | 13.08792186 | 11.1843     | 3.13E-34    | ECM_AFFILIATED     | 1.056756861 | 1.170204829 |
| SDC4      | 13.23332781 | 12.80626996 | 3.90E-16    | 13.23332781 | 13.01846195 | 0.016609306 | ECM_AFFILIATED     | 1.033347559 | 1.016504704 |
| SEMA3F    | 11.5286231  | 10.50643084 | 1.01E-76    | 11.5286231  | 10.68371062 | 3.28E-21    | ECM_AFFILIATED     | 1.097292057 | 1.079084179 |
| SEMA4A    | 10.26598795 | 9.652725305 | 3.88E-35    | 10.26598795 | 9.53340177  | 1.29E-13    | ECM_AFFILIATED     | 1.063532591 | 1.076844153 |
| SEMA4C    | 10.8784269  | 10.76954493 | 0.000115669 | 10.8784269  | 10.59589381 | 9.94E-05    | ECM_AFFILIATED     | 1.010110174 | 1.026664394 |
| SERPINA12 | 2.273342409 | 0.784366038 | 6.28E-197   | 2.273342409 | 1.763317699 | 0.003463727 | ECM_REGULATORS     | 2.898318259 | 1.289241531 |
| SERPINA3  | 13.40453251 | 8.72563917  | 4.71E-293   | 13.40453251 | 12.56724248 | 0.000112265 | ECM_REGULATORS     | 1.536223565 | 1.066624801 |
| SERPINA9  | 2.433109158 | 1.232506092 | 7.94E-103   | 2.433109158 | 1.019859292 | 1.54E-15    | ECM_REGULATORS     | 1.974115321 | 2.385730245 |
| SERPINH1  | 12.9210047  | 12.66867659 | 2.23E-09    | 12.9210047  | 12.24689381 | 1.03E-14    | ECM_REGULATORS     | 1.01991748  | 1.055043418 |
| SPOCK1    | 10.01728688 | 9.265470566 | 7.67E-19    | 10.01728688 | 9.688836283 | 0.025913676 | PROTEOGLYCANS      | 1.08114173  | 1.033899902 |
| ST14      | 12.17680759 | 11.66179909 | 5.94E-11    | 12.17680759 | 11.06404779 | 2.21E-23    | ECM_REGULATORS     | 1.044162011 | 1.100574385 |
| SULF1     | 12.71079884 | 10.817344   | 1.68E-145   | 12.71079884 | 11.42015575 | 1.60E-22    | ECM_REGULATORS     | 1.175038794 | 1.113014491 |
| SULF2     | 12.76129191 | 11.67624188 | 1.06E-103   | 12.76129191 | 12.12462301 | 1.12E-08    | ECM_REGULATORS     | 1.09292802  | 1.052510408 |
| THBS2     | 13.01113729 | 10.91948638 | 1.47E-203   | 13.01113729 | 12.29882124 | 4.49E-07    | ECM_GLYCOPROTEINS  | 1.191552133 | 1.057917425 |
| TNFAIP6   | 8.225396782 | 6.293037617 | 4.43E-144   | 8.225396782 | 7.612272566 | 3.77E-07    | ECM_GLYCOPROTEINS  | 1.307063025 | 1.080544175 |
| TNR       | 3.775593069 | 3.526543278 | 0.019248055 | 3.775593069 | 2.500474336 | 1.26E-12    | ECM_GLYCOPROTEINS  | 1.070621504 | 1.509950738 |
| VCAN      | 13.26468837 | 11.47016127 | 3.51E-142   | 13.26468837 | 12.02102655 | 2.37E-17    | PROTEOGLYCANS      | 1.156451775 | 1.103457206 |
| WISP1     | 8.78589604  | 7.146855148 | 3.90E-124   | 8.78589604  | 5.790788496 | 1.63E-66    | ECM_GLYCOPROTEINS  | 1.22933736  | 1.517219295 |

|              |             |             |           |             |             |             |                   |             |             |
|--------------|-------------|-------------|-----------|-------------|-------------|-------------|-------------------|-------------|-------------|
| <b>WNT2</b>  | 7.841377888 | 5.318455288 | 7.54E-174 | 7.841377888 | 7.12390885  | 6.33E-06    | SECRETED_FACTORS  | 1.474371309 | 1.100712832 |
| <b>WNT7B</b> | 8.722412624 | 7.031001003 | 1.74E-52  | 8.722412624 | 6.962693805 | 8.76E-20    | SECRETED_FACTORS  | 1.240564839 | 1.252735345 |
| <b>WNT9A</b> | 8.119590347 | 6.78354759  | 1.15E-92  | 8.119590347 | 7.795253097 | 0.006722567 | SECRETED_FACTORS  | 1.196953399 | 1.04160702  |
| <b>VWA9</b>  | 10.79560215 | 10.60224113 | 5.80E-44  | 10.79560215 | 10.5004469  | 1.74E-13    | ECM_GLYCOPROTEINS | 1.018237749 | 1.028108827 |
| <b>ZP3</b>   | 8.164847855 | 7.748374706 | 3.71E-20  | 8.164847855 | 7.484613274 | 1.09E-10    | ECM_GLYCOPROTEINS | 1.053749743 | 1.090884399 |
| <b>ZP4</b>   | 0.627632096 | 0.328370016 | 3.30E-21  | 0.627632096 | 0.053215044 | 1.56E-06    | ECM_GLYCOPROTEINS | 1.91135629  | 11.79426053 |
| <b>ZPLD1</b> | 3.564240264 | 2.122234415 | 2.85E-112 | 3.564240264 | 2.813462832 | 0.000335311 | ECM_GLYCOPROTEINS | 1.679475292 | 1.266851733 |

**Cervical and endocervical cancer (CESC)**

| Signature genes | Expression in tumor | Expression in rest of Pan-Cancer | P-value     | Expression in tumor | Expression in normal tissue | P-value     | Matrisome category | Fold change vs. Pan-Cancer | Fold change vs. normal |
|-----------------|---------------------|----------------------------------|-------------|---------------------|-----------------------------|-------------|--------------------|----------------------------|------------------------|
| A2ML1           | 9.514129126         | 3.790856356                      | 3.82E-163   | 9.514129126         | 4.331966667                 | 0.018090263 | ECM_REGULATORS     | 2.509757224                | 2.196260927            |
| ADAM17          | 10.49418641         | 10.14128815                      | 5.50E-08    | 10.49418641         | 8.909466667                 | 0.0128704   | ECM_REGULATORS     | 1.034798169                | 1.177869204            |
| ADAM8           | 10.43366667         | 8.674758783                      | 1.90E-69    | 10.43366667         | 7.911233333                 | 0.002841297 | ECM_REGULATORS     | 1.20276159                 | 1.318841984            |
| ADAMDEC1        | 6.688965696         | 6.075688093                      | 0.000148448 | 6.688965696         | 2.300133333                 | 0.000776409 | ECM_REGULATORS     | 1.100939613                | 2.90807737             |
| AGRN            | 13.66198803         | 13.21509687                      | 3.90E-09    | 13.66198803         | 11.835                      | 0.000661704 | ECM_GLYCOPROTEINS  | 1.033816715                | 1.154371612            |
| AGRN            | 13.66198803         | 13.21509687                      | 3.90E-09    | 13.66198803         | 11.835                      | 0.000661704 | BASEMENT_MEMBRANES | 1.033816715                | 1.154371612            |
| AMH             | 6.195443366         | 4.848428243                      | 8.55E-22    | 6.195443366         | 2.708133333                 | 0.007704271 | SECRETED_FACTORS   | 1.277825113                | 2.287717259            |
| ANXA1           | 14.4732835          | 12.33281074                      | 4.07E-80    | 14.4732835          | 12.6937                     | 0.040766622 | ECM_AFFILIATED     | 1.173559199                | 1.14019423             |
| ANXA2           | 15.80602945         | 14.32990725                      | 4.13E-65    | 15.80602945         | 14.39736667                 | 0.002895733 | ECM_AFFILIATED     | 1.103009892                | 1.097841697            |
| ANXA3           | 10.71969223         | 9.057695951                      | 7.63E-26    | 10.71969223         | 8.7174                      | 0.019638957 | ECM_AFFILIATED     | 1.183489962                | 1.229689154            |
| ANXA8           | 11.67643366         | 4.785109393                      | 2.82E-204   | 11.67643366         | 4.564766667                 | 0.000295087 | ECM_AFFILIATED     | 2.440160234                | 2.557947538            |
| ANXA8L1         | 10.66219126         | 4.967643938                      | 1.72E-178   | 10.66219126         | 4.1037                      | 0.000817142 | ECM_AFFILIATED     | 2.146327594                | 2.598189746            |
| ARTN            | 7.170338188         | 5.254881498                      | 2.86E-56    | 7.170338188         | 4.701466667                 | 0.0170519   | SECRETED_FACTORS   | 1.364509969                | 1.525127943            |
| BMP8B           | 8.575183495         | 7.764558468                      | 6.45E-16    | 8.575183495         | 6.360633333                 | 0.000113741 | SECRETED_FACTORS   | 1.10440066                 | 1.34816504             |
| CCL18           | 7.500533333         | 6.932424042                      | 0.003694628 | 7.500533333         | 2.386666667                 | 0.000242165 | SECRETED_FACTORS   | 1.081949588                | 3.142681564            |
| CCL20           | 8.072576052         | 5.783442632                      | 8.18E-31    | 8.072576052         | 4.917366667                 | 0.031984335 | SECRETED_FACTORS   | 1.395808097                | 1.641646149            |
| CCL22           | 7.255526861         | 5.806754854                      | 1.70E-26    | 7.255526861         | 4.419433333                 | 0.003559671 | SECRETED_FACTORS   | 1.249497704                | 1.641732393            |
| CLEC7A          | 8.239785113         | 7.68305222                       | 3.15E-08    | 8.239785113         | 5.961333333                 | 0.044479298 | ECM_AFFILIATED     | 1.072462464                | 1.382205063            |
| COL17A1         | 10.73218964         | 7.260558424                      | 1.71E-53    | 10.73218964         | 5.7598                      | 0.007505702 | COLLAGENS          | 1.47814934                 | 1.863292066            |
| COL7A1          | 12.93183301         | 8.794812919                      | 6.81E-190   | 12.93183301         | 9.363666667                 | 0.000491744 | COLLAGENS          | 1.470393188                | 1.381065075            |
| CRLF3           | 9.310138511         | 8.999731443                      | 1.45E-09    | 9.310138511         | 8.211066667                 | 0.003994024 | SECRETED_FACTORS   | 1.034490703                | 1.133852505            |
| CSF2            | 3.413646602         | 1.803928526                      | 1.14E-41    | 3.413646602         | 0.7561                      | 0.016659252 | SECRETED_FACTORS   | 1.892340274                | 4.514808361            |
| CSH2            | 2.149573463         | 0.354145385                      | 8.59E-179   | 2.149573463         | 0                           | 0.046514588 | SECRETED_FACTORS   | 6.069748618                | Inf                    |
| CSPG5           | 6.559236246         | 6.174499793                      | 0.01079021  | 6.559236246         | 4.634366667                 | 0.028647139 | ECM_AFFILIATED     | 1.062310546                | 1.415346846            |
| CST6            | 7.385954369         | 4.590093753                      | 4.15E-51    | 7.385954369         | 3.7497                      | 0.009790189 | ECM_REGULATORS     | 1.609107519                | 1.969745411            |
| CSTA            | 11.43617476         | 7.004722236                      | 4.55E-186   | 11.43617476         | 4.915966667                 | 0.000953433 | ECM_REGULATORS     | 1.632637865                | 2.326332852            |
| CSTB            | 14.16081489         | 12.46795209                      | 1.21E-149   | 14.16081489         | 11.84826667                 | 0.002293596 | ECM_REGULATORS     | 1.135777134                | 1.195180298            |
| CTSC            | 12.51150065         | 12.06247845                      | 3.96E-07    | 12.51150065         | 10.89746667                 | 0.007951758 | ECM_REGULATORS     | 1.037224705                | 1.148110935            |
| CTSV            | 10.61893883         | 7.038075392                      | 1.32E-137   | 10.61893883         | 4.943066667                 | 2.38E-11    | ECM_REGULATORS     | 1.508784468                | 2.148249164            |
| CXCL1           | 10.39414887         | 6.587876067                      | 8.26E-92    | 10.39414887         | 6.949066667                 | 0.015082424 | SECRETED_FACTORS   | 1.577769339                | 1.495761858            |
| CXCL10          | 10.13062816         | 8.216557989                      | 3.17E-36    | 10.13062816         | 5.570766667                 | 0.002130547 | SECRETED_FACTORS   | 1.232952797                | 1.818533922            |
| CXCL11          | 8.039445955         | 6.317128309                      | 3.30E-30    | 8.039445955         | 4.231933333                 | 0.014145033 | SECRETED_FACTORS   | 1.272642499                | 1.899709972            |
| CXCL13          | 7.595131715         | 6.126360231                      | 6.26E-14    | 7.595131715         | 4.0281                      | 0.024522538 | SECRETED_FACTORS   | 1.239746184                | 1.885537031            |
| CXCL8           | 9.849922654         | 7.774415085                      | 7.59E-38    | 9.849922654         | 6.272466667                 | 0.006527141 | SECRETED_FACTORS   | 1.266966395                | 1.570342766            |
| CXCL9           | 9.975141748         | 8.855705986                      | 5.50E-11    | 9.975141748         | 5.6245                      | 0.003535258 | SECRETED_FACTORS   | 1.126408415                | 1.773516179            |
| EGFL6           | 7.558454369         | 5.613663158                      | 4.76E-28    | 7.558454369         | 5.244433333                 | 0.019497922 | SECRETED_FACTORS   | 1.346438886                | 1.441233759            |
| EPGN            | 3.593149838         | 1.466454027                      | 4.48E-71    | 3.593149838         | 0                           | 0.02952027  | SECRETED_FACTORS   | 2.450230128                | Inf                    |
| F12             | 8.728497411         | 7.072578026                      | 3.38E-30    | 8.728497411         | 3.194466667                 | 7.86E-12    | ECM_REGULATORS     | 1.23413236                 | 2.732380182            |
| FGF11           | 8.97988932          | 7.455610263                      | 8.71E-34    | 8.97988932          | 6.3231                      | 0.011927717 | SECRETED_FACTORS   | 1.204447256                | 1.42017196             |
| GPC1            | 12.49667476         | 11.38650372                      | 1.62E-37    | 12.49667476         | 10.93086667                 | 0.026321674 | ECM_AFFILIATED     | 1.097498851                | 1.143246472            |
| GPC2            | 6.396338511         | 5.528092229                      | 1.68E-12    | 6.396338511         | 3.9654                      | 0.013366729 | ECM_AFFILIATED     | 1.157060745                | 1.613037401            |

|           |             |             |             |             |             |             |                    |             |             |
|-----------|-------------|-------------|-------------|-------------|-------------|-------------|--------------------|-------------|-------------|
| HAPLN1    | 5.930613916 | 5.192622214 | 3.65E-05    | 5.930613916 | 0.212233333 | 5.53E-06    | PROTEOGLYCANS      | 1.142123126 | 27.94383815 |
| HMSD      | 6.003397411 | 2.728630736 | 3.59E-178   | 6.003397411 | 1.237566667 | 0.000130126 | ECM_REGULATORS     | 2.200150182 | 4.850968899 |
| HPSE      | 9.087242395 | 7.674142349 | 1.05E-59    | 9.087242395 | 7.656833333 | 0.029770211 | ECM_REGULATORS     | 1.184137847 | 1.186814705 |
| KCP       | 8.046039806 | 5.804015945 | 3.76E-60    | 8.046039806 | 4.7788      | 0.007103291 | ECM_GLYCOPROTEINS  | 1.38628837  | 1.683694611 |
| LAMA5     | 13.05631456 | 12.24232562 | 3.13E-22    | 13.05631456 | 12.05316667 | 0.042885483 | BASEMENT_MEMBRANES | 1.066489731 | 1.083226917 |
| LAMA5     | 13.05631456 | 12.24232562 | 3.13E-22    | 13.05631456 | 12.05316667 | 0.042885483 | ECM_GLYCOPROTEINS  | 1.066489731 | 1.083226917 |
| LAMB3     | 13.57687573 | 10.41794833 | 8.09E-89    | 13.57687573 | 8.3254      | 6.97E-07    | BASEMENT_MEMBRANES | 1.303219722 | 1.630777588 |
| LAMB3     | 13.57687573 | 10.41794833 | 8.09E-89    | 13.57687573 | 8.3254      | 6.97E-07    | ECM_GLYCOPROTEINS  | 1.303219722 | 1.630777588 |
| LAMC2     | 12.93690647 | 9.673943753 | 5.17E-49    | 12.93690647 | 8.3977      | 5.24E-05    | BASEMENT_MEMBRANES | 1.337293952 | 1.540529725 |
| LAMC2     | 12.93690647 | 9.673943753 | 5.17E-49    | 12.93690647 | 8.3977      | 5.24E-05    | ECM_GLYCOPROTEINS  | 1.337293952 | 1.540529725 |
| LGALS7    | 7.793349838 | 2.063296659 | 1.17E-298   | 7.793349838 | 2.243566667 | 0.007311368 | ECM_AFFILIATED     | 3.77713491  | 3.473643085 |
| LGALS9B   | 5.092482848 | 2.503604669 | 4.17E-71    | 5.092482848 | 1.7004      | 0.017770363 | ECM_AFFILIATED     | 2.034060293 | 2.99487347  |
| LGALS9C   | 5.864445955 | 3.418625566 | 1.35E-66    | 5.864445955 | 2.354566667 | 0.008609733 | ECM_AFFILIATED     | 1.715439682 | 2.490668894 |
| MMP1      | 9.011963754 | 6.509346419 | 2.03E-29    | 9.011963754 | 4.3944      | 0.005724577 | ECM_REGULATORS     | 1.384465225 | 2.050783669 |
| MMP11     | 11.75408317 | 9.817103461 | 1.07E-31    | 11.75408317 | 9.383       | 0.029076794 | ECM_REGULATORS     | 1.197306641 | 1.252699901 |
| MMP12     | 8.778456634 | 5.248954386 | 2.79E-58    | 8.778456634 | 4.290566667 | 0.000830493 | ECM_REGULATORS     | 1.672420065 | 2.045990033 |
| MMP3      | 7.5063411   | 4.050837788 | 2.61E-60    | 7.5063411   | 2.703666667 | 0.004190837 | ECM_REGULATORS     | 1.853034234 | 2.776355973 |
| MMP9      | 10.2367754  | 9.218202699 | 4.04E-10    | 10.2367754  | 6.0924      | 0.000256134 | ECM_REGULATORS     | 1.110495803 | 1.680253333 |
| MUC15     | 5.837216828 | 4.400525729 | 1.47E-09    | 5.837216828 | 1.503933333 | 0.017843318 | ECM_AFFILIATED     | 1.326481695 | 3.881300254 |
| MUC4      | 11.87259126 | 6.398793851 | 4.39E-138   | 11.87259126 | 7.844533333 | 0.029328503 | ECM_AFFILIATED     | 1.855442063 | 1.513485985 |
| OGFOD2    | 9.232738188 | 9.057151916 | 6.31E-06    | 9.232738188 | 8.5622      | 0.024241545 | ECM_REGULATORS     | 1.019386478 | 1.078313773 |
| PI3       | 11.10691424 | 5.227828624 | 1.10E-134   | 11.10691424 | 6.0134      | 0.009358876 | ECM_REGULATORS     | 2.124575046 | 1.847027346 |
| PLAU      | 11.87068964 | 10.34115838 | 4.01E-38    | 11.87068964 | 9.018966667 | 0.00161957  | ECM_REGULATORS     | 1.14790715  | 1.316191764 |
| PLXNA1    | 12.20231456 | 11.39477878 | 2.30E-28    | 12.20231456 | 10.56816667 | 0.001336495 | ECM_AFFILIATED     | 1.070868931 | 1.15462927  |
| PLXNB1    | 12.06207217 | 11.86658829 | 0.006690689 | 12.06207217 | 10.93726667 | 0.008301909 | ECM_AFFILIATED     | 1.016473469 | 1.102841554 |
| PLXNB2    | 13.94196828 | 13.65677356 | 3.09E-08    | 13.94196828 | 13.2648     | 0.042473411 | ECM_AFFILIATED     | 1.020883023 | 1.051050018 |
| PODNL1    | 7.140645955 | 6.502546702 | 6.16E-07    | 7.140645955 | 4.5077      | 0.002742882 | PROTEOGLYCANS      | 1.098130668 | 1.584099642 |
| PRSS3     | 4.727119094 | 4.291396093 | 0.044699264 | 4.727119094 | 0.8885      | 0.042949547 | ECM_REGULATORS     | 1.101534091 | 5.320336628 |
| SDC1      | 14.73379029 | 12.08857194 | 1.10E-74    | 14.73379029 | 8.528033333 | 5.65E-14    | ECM_AFFILIATED     | 1.218819755 | 1.727689107 |
| SDC4      | 13.62304595 | 12.74728346 | 8.00E-18    | 13.62304595 | 12.4952     | 0.031706853 | ECM_AFFILIATED     | 1.068701893 | 1.090262337 |
| SEMA3F    | 12.14108803 | 10.42783493 | 9.07E-60    | 12.14108803 | 10.05543333 | 7.97E-05    | ECM_AFFILIATED     | 1.164296147 | 1.207415695 |
| SEMA4A    | 10.47042783 | 9.607952449 | 2.31E-19    | 10.47042783 | 8.0677      | 1.90E-05    | ECM_AFFILIATED     | 1.089766825 | 1.297820672 |
| SEMA4B    | 13.33532298 | 11.68045987 | 5.56E-124   | 13.33532298 | 10.7566     | 7.00E-05    | ECM_AFFILIATED     | 1.141677907 | 1.239734022 |
| SERPINB13 | 9.784079935 | 1.408272159 | 0           | 9.784079935 | 4.175566667 | 0.031561843 | ECM_REGULATORS     | 6.947577477 | 2.343174164 |
| SERPINB2  | 8.467252751 | 3.304195244 | 8.93E-162   | 8.467252751 | 2.5344      | 0.001774744 | ECM_REGULATORS     | 2.562576399 | 3.340929905 |
| SERPINB3  | 12.38856117 | 2.392725392 | 0           | 12.38856117 | 7.435733333 | 0.018968262 | ECM_REGULATORS     | 5.177594223 | 1.66608465  |
| SERPINB4  | 10.97515987 | 1.89524101  | 0           | 10.97515987 | 4.828933333 | 0.003782552 | ECM_REGULATORS     | 5.790904593 | 2.272791756 |
| SERPINB5  | 12.02747832 | 5.178847333 | 3.07E-146   | 12.02747832 | 5.156433333 | 2.66E-05    | ECM_REGULATORS     | 2.322423803 | 2.332518921 |
| SERPINB7  | 7.473047249 | 2.707530387 | 2.35E-177   | 7.473047249 | 2.642033333 | 0.00314979  | ECM_REGULATORS     | 2.760097277 | 2.828521183 |
| SERPINB8  | 9.739896117 | 8.658668862 | 4.14E-56    | 9.739896117 | 8.0066      | 0.005448461 | ECM_REGULATORS     | 1.124872226 | 1.216483416 |
| ST14      | 13.35476408 | 11.50465816 | 4.24E-34    | 13.35476408 | 8.803366667 | 3.50E-14    | ECM_REGULATORS     | 1.160813636 | 1.517006457 |
| TGM1      | 9.783284466 | 5.825268317 | 2.80E-187   | 9.783284466 | 5.4987      | 0.012739685 | ECM_REGULATORS     | 1.679456453 | 1.779199532 |
| TGM5      | 5.651428479 | 2.568398792 | 1.48E-109   | 5.651428479 | 1.7551      | 0.009272595 | ECM_REGULATORS     | 2.200370323 | 3.220003692 |
| WNT10A    | 7.613164078 | 5.674497355 | 8.02E-36    | 7.613164078 | 3.360133333 | 0.001001042 | SECRETED_FACTORS   | 1.341645542 | 2.265732732 |
| WNT3A     | 5.469840453 | 2.46023867  | 1.39E-99    | 5.469840453 | 1.621166667 | 0.004512346 | SECRETED_FACTORS   | 2.223296674 | 3.374014878 |
| WNT7B     | 10.31688641 | 6.71497389  | 6.05E-69    | 10.31688641 | 4.009733333 | 4.52E-10    | SECRETED_FACTORS   | 1.536400078 | 2.572960731 |

|             |             |             |            |             |             |             |                   |             |            |
|-------------|-------------|-------------|------------|-------------|-------------|-------------|-------------------|-------------|------------|
| <b>VWA9</b> | 10.72309709 | 10.62042746 | 0.00011719 | 10.72309709 | 10.27616667 | 0.046842758 | ECM_GLYCOPROTEINS | 1.009667184 | 1.04349194 |
|-------------|-------------|-------------|------------|-------------|-------------|-------------|-------------------|-------------|------------|



**Cholangiocarcinoma (CHOL)**

| Signature genes | Expression in tumor | Expression in rest of Pan-Cancer | P-value     | Expression in tumor | Expression in normal tissue | P-value     | Matrisome category | Fold change vs. Pan-Cancer | Fold change vs. normal |
|-----------------|---------------------|----------------------------------|-------------|---------------------|-----------------------------|-------------|--------------------|----------------------------|------------------------|
| ADAM28          | 8.717384444         | 8.144706616                      | 0.042392565 | 8.717384444         | 5.929011111                 | 0.000248605 | ECM_REGULATORS     | 1.070312886                | 1.470293154            |
| ADAMTS10        | 9.514424444         | 7.635274144                      | 1.44E-16    | 9.514424444         | 8.412066667                 | 0.020472007 | ECM_REGULATORS     | 1.246114319                | 1.131044822            |
| ADAMTS16        | 6.491073333         | 5.21190931                       | 0.001028455 | 6.491073333         | 4.210088889                 | 0.032711324 | ECM_REGULATORS     | 1.245430983                | 1.541790092            |
| AGRN            | 13.84950667         | 13.3278158                       | 0.007281928 | 13.84950667         | 12.04275556                 | 0.000152247 | ECM_GLYCOPROTEINS  | 1.039143013                | 1.150028048            |
| AGRN            | 13.84950667         | 13.3278158                       | 0.007281928 | 13.84950667         | 12.04275556                 | 0.000152247 | BASEMENT_MEMBRANES | 1.039143013                | 1.150028048            |
| AMH             | 5.658886667         | 4.921354895                      | 0.040457558 | 5.658886667         | 3.104122222                 | 0.003168167 | SECRETED_FACTORS   | 1.149863562                | 1.823023148            |
| ANXA11          | 13.31701333         | 12.83159322                      | 0.001705166 | 13.31701333         | 11.92021111                 | 1.42E-05    | ECM_AFFILIATED     | 1.037830073                | 1.117179319            |
| ANXA13          | 10.99236            | 3.760670871                      | 1.28E-50    | 10.99236            | 8.991088889                 | 0.0417013   | ECM_AFFILIATED     | 2.922978473                | 1.222583842            |
| ANXA3           | 10.08162            | 9.322621984                      | 0.048811243 | 10.08162            | 7.1658                      | 0.00045096  | ECM_AFFILIATED     | 1.081414651                | 1.406907812            |
| ANXA4           | 14.41420444         | 11.92812769                      | 1.44E-32    | 14.41420444         | 12.82972222                 | 0.001451373 | ECM_AFFILIATED     | 1.208421373                | 1.123500899            |
| BGLAP           | 4.642831111         | 4.098312274                      | 0.011510355 | 4.642831111         | 3.158611111                 | 0.008513218 | ECM_GLYCOPROTEINS  | 1.132864165                | 1.469896403            |
| CCL20           | 8.991948889         | 5.85601887                       | 4.79E-10    | 8.991948889         | 6.502677778                 | 0.003775222 | SECRETED_FACTORS   | 1.53550545                 | 1.382807083            |
| CLCF1           | 9.167851111         | 7.740658906                      | 8.73E-08    | 9.167851111         | 7.187466667                 | 0.000646807 | SECRETED_FACTORS   | 1.184376062                | 1.275533027            |
| COL4A3          | 7.023937778         | 5.757719739                      | 0.004554614 | 7.023937778         | 5.698933333                 | 0.042228547 | COLLAGENS          | 1.219916581                | 1.232500429            |
| COL4A3          | 7.023937778         | 5.757719739                      | 0.004554614 | 7.023937778         | 5.698933333                 | 0.042228547 | BASEMENT_MEMBRANES | 1.219916581                | 1.232500429            |
| CST2            | 5.056413333         | 3.647997336                      | 0.00092016  | 5.056413333         | 2.242733333                 | 0.000891252 | ECM_REGULATORS     | 1.386079229                | 2.254576261            |
| CTSC            | 12.73839556         | 12.19572184                      | 0.017464141 | 12.73839556         | 10.92235556                 | 0.000382639 | ECM_REGULATORS     | 1.044497055                | 1.166268164            |
| CTSH            | 13.55254            | 12.11308902                      | 1.21E-11    | 13.55254            | 12.36491111                 | 0.008928358 | ECM_REGULATORS     | 1.118834343                | 1.096048316            |
| CXCL1           | 9.382997778         | 6.974505339                      | 1.02E-06    | 9.382997778         | 7.437911111                 | 0.022260708 | SECRETED_FACTORS   | 1.345328066                | 1.261509803            |
| CXCL8           | 10.60451111         | 8.042846702                      | 1.33E-09    | 10.60451111         | 8.618811111                 | 0.027582229 | SECRETED_FACTORS   | 1.318502205                | 1.230391405            |
| EDA             | 8.162688889         | 7.291974603                      | 0.001283012 | 8.162688889         | 7.117877778                 | 0.024419953 | SECRETED_FACTORS   | 1.119407202                | 1.146786886            |
| FGF12           | 7.493855556         | 6.303783664                      | 0.000854937 | 7.493855556         | 5.173666667                 | 0.004222516 | SECRETED_FACTORS   | 1.188786918                | 1.448461225            |
| FRAS1           | 10.15242            | 8.492037441                      | 4.47E-06    | 10.15242            | 7.059688889                 | 0.000828288 | ECM_GLYCOPROTEINS  | 1.195522284                | 1.438083202            |
| IBSP            | 4.182671111         | 3.321830985                      | 0.029283794 | 4.182671111         | 0.321166667                 | 0.000878345 | ECM_GLYCOPROTEINS  | 1.259146275                | 13.0233662             |
| ITIH5           | 12.30814            | 9.233053667                      | 6.37E-21    | 12.30814            | 8.220522222                 | 0.000167659 | ECM_REGULATORS     | 1.333051929                | 1.497245512            |
| LAMA5           | 13.08274222         | 12.38471859                      | 0.000890017 | 13.08274222         | 10.99546667                 | 1.74E-05    | ECM_GLYCOPROTEINS  | 1.056361687                | 1.189830556            |
| LAMA5           | 13.08274222         | 12.38471859                      | 0.000890017 | 13.08274222         | 10.99546667                 | 1.74E-05    | BASEMENT_MEMBRANES | 1.056361687                | 1.189830556            |
| LAMB1           | 12.78626            | 12.27149268                      | 0.037389473 | 12.78626            | 11.20578889                 | 0.000303658 | BASEMENT_MEMBRANES | 1.041948224                | 1.141040593            |
| LAMB1           | 12.78626            | 12.27149268                      | 0.037389473 | 12.78626            | 11.20578889                 | 0.000303658 | ECM_GLYCOPROTEINS  | 1.041948224                | 1.141040593            |
| LAMB3           | 12.18653556         | 10.88015143                      | 0.002449804 | 12.18653556         | 9.040177778                 | 4.28E-05    | ECM_GLYCOPROTEINS  | 1.120070399                | 1.348041582            |
| LAMB3           | 12.18653556         | 10.88015143                      | 0.002449804 | 12.18653556         | 9.040177778                 | 4.28E-05    | BASEMENT_MEMBRANES | 1.120070399                | 1.348041582            |
| LAMC1           | 13.22067778         | 12.81834145                      | 0.043114543 | 13.22067778         | 11.38597778                 | 0.000133286 | BASEMENT_MEMBRANES | 1.031387549                | 1.161136798            |
| LAMC1           | 13.22067778         | 12.81834145                      | 0.043114543 | 13.22067778         | 11.38597778                 | 0.000133286 | ECM_GLYCOPROTEINS  | 1.031387549                | 1.161136798            |
| LAMC2           | 11.83048222         | 10.30634999                      | 0.007664373 | 11.83048222         | 7.253066667                 | 1.91E-05    | ECM_GLYCOPROTEINS  | 1.147882833                | 1.631100714            |
| LAMC2           | 11.83048222         | 10.30634999                      | 0.007664373 | 11.83048222         | 7.253066667                 | 1.91E-05    | BASEMENT_MEMBRANES | 1.147882833                | 1.631100714            |
| LGALS9          | 11.49061556         | 10.91498941                      | 0.008790636 | 11.49061556         | 9.483155556                 | 0.00024324  | ECM_AFFILIATED     | 1.052737215                | 1.211686921            |
| LGALS9B         | 3.888948889         | 2.802568376                      | 0.006482108 | 3.888948889         | 1.934011111                 | 0.017663085 | ECM_AFFILIATED     | 1.387637469                | 2.010820345            |
| LOXL4           | 10.50366667         | 7.762506616                      | 1.36E-15    | 10.50366667         | 7.781388889                 | 0.000630521 | ECM_REGULATORS     | 1.353128208                | 1.349844715            |
| LTBP3           | 12.67204444         | 12.18913514                      | 0.00840958  | 12.67204444         | 11.97125556                 | 0.01599177  | ECM_GLYCOPROTEINS  | 1.039618013                | 1.058539297            |
| MMP24           | 8.549486667         | 6.976836893                      | 1.66E-05    | 8.549486667         | 5.785855556                 | 0.000824987 | ECM_REGULATORS     | 1.225410139                | 1.477652974            |
| MMP7            | 10.99070222         | 8.338187526                      | 1.31E-05    | 10.99070222         | 7.114788889                 | 0.000967345 | ECM_REGULATORS     | 1.31811646                 | 1.544768565            |

|                |             |             |             |             |             |             |                   |             |             |
|----------------|-------------|-------------|-------------|-------------|-------------|-------------|-------------------|-------------|-------------|
| <b>MUC13</b>   | 9.166308889 | 4.625577288 | 9.80E-12    | 9.166308889 | 4.631688889 | 0.000423468 | ECM_AFFILIATED    | 1.981657276 | 1.979042442 |
| <b>MUC20</b>   | 10.67625111 | 9.049174913 | 3.99E-05    | 10.67625111 | 8.639433333 | 0.004508428 | ECM_AFFILIATED    | 1.179803818 | 1.235758261 |
| <b>OTOG</b>    | 3.278717778 | 1.294315707 | 1.21E-12    | 3.278717778 | 0.231422222 | 0.00099601  | ECM_GLYCOPROTEINS | 2.533166955 | 14.16768773 |
| <b>PLOD3</b>   | 12.26494444 | 11.66115053 | 0.000132368 | 12.26494444 | 11.3402     | 0.000224254 | ECM_REGULATORS    | 1.051778245 | 1.081545691 |
| <b>PLXNB2</b>  | 14.42507333 | 13.68274198 | 1.50E-08    | 14.42507333 | 13.75444444 | 0.010803833 | ECM_AFFILIATED    | 1.054253113 | 1.04875725  |
| <b>PLXNB3</b>  | 9.231353333 | 8.448288315 | 0.041319563 | 9.231353333 | 6.432088889 | 0.000804851 | ECM_AFFILIATED    | 1.092689192 | 1.43520301  |
| <b>REG1A</b>   | 5.260693333 | 2.828283195 | 0.000155934 | 5.260693333 | 1.0297      | 0.0054383   | ECM_AFFILIATED    | 1.860030616 | 5.108957301 |
| <b>SEMA3E</b>  | 7.496664444 | 5.290611356 | 5.42E-06    | 7.496664444 | 5.378366667 | 0.045244281 | ECM_AFFILIATED    | 1.416975079 | 1.393855218 |
| <b>SEMA6A</b>  | 11.29825111 | 9.633962968 | 2.14E-08    | 11.29825111 | 9.276755556 | 0.001035959 | ECM_AFFILIATED    | 1.172752184 | 1.217909758 |
| <b>SFTA2</b>   | 4.31276     | 3.218235206 | 0.043566529 | 4.31276     | 2.391       | 0.04905761  | ECM_AFFILIATED    | 1.340100932 | 1.803747386 |
| <b>SPP1</b>    | 14.55278667 | 12.02522585 | 5.44E-08    | 14.55278667 | 10.32803333 | 0.001032058 | ECM_GLYCOPROTEINS | 1.21018822  | 1.409056903 |
| <b>TGM3</b>    | 5.379013333 | 3.865587137 | 0.001262149 | 5.379013333 | 2.945666667 | 0.015938644 | ECM_REGULATORS    | 1.391512633 | 1.826076723 |
| <b>THBS3</b>   | 10.20764667 | 9.886424149 | 0.035712411 | 10.20764667 | 8.956644444 | 0.00043155  | ECM_GLYCOPROTEINS | 1.032491274 | 1.139673092 |
| <b>TIMP1</b>   | 14.01019111 | 13.07373821 | 0.000304222 | 14.01019111 | 12.67466667 | 0.003658915 | ECM_REGULATORS    | 1.071628549 | 1.105369591 |
| <b>TINAG</b>   | 3.055817778 | 1.888654027 | 0.018339637 | 3.055817778 | 0.153922222 | 0.006443728 | ECM_GLYCOPROTEINS | 1.617987061 | 19.85299935 |
| <b>TINAGL1</b> | 11.26729333 | 10.6401024  | 0.041314213 | 11.26729333 | 9.955811111 | 0.002947256 | ECM_GLYCOPROTEINS | 1.058945948 | 1.131730324 |
| <b>VWA7</b>    | 8.161304444 | 6.571677298 | 5.96E-09    | 8.161304444 | 6.430344444 | 0.000374835 | ECM_GLYCOPROTEINS | 1.241890628 | 1.269186202 |
| <b>VWDE</b>    | 5.589968889 | 4.370217663 | 0.003702368 | 5.589968889 | 3.770844444 | 0.030437918 | ECM_GLYCOPROTEINS | 1.279105372 | 1.482418321 |
| <b>ZPLD1</b>   | 5.786535556 | 2.26459539  | 1.68E-29    | 5.786535556 | 3.9729      | 0.041046614 | ECM_GLYCOPROTEINS | 2.555218288 | 1.456501688 |

**Colon Adenocarcinoma (COAD)**

| Signature genes | Expression in tumor | Expression in rest of Pan-Cancer | P-value     | Expression in tumor | Expression in normal tissue | P-value     | Matrisome category | Fold change vs. Pan-Cancer | Fold change vs. normal |
|-----------------|---------------------|----------------------------------|-------------|---------------------|-----------------------------|-------------|--------------------|----------------------------|------------------------|
| ACAN            | 7.741981269         | 6.323319026                      | 3.44E-26    | 7.741981269         | 4.509321951                 | 7.89E-25    | PROTEOGLYCANS      | 1.224354052                | 1.716883681            |
| ADAM19          | 10.15683112         | 8.916404124                      | 8.79E-43    | 10.15683112         | 9.618573171                 | 0.002278981 | ECM_REGULATORS     | 1.139117404                | 1.05596027             |
| ADAM9           | 12.30679577         | 11.71561116                      | 8.25E-17    | 12.30679577         | 11.95276829                 | 0.004866329 | ECM_REGULATORS     | 1.050461269                | 1.029618869            |
| ADAMTS12        | 8.827316616         | 7.868232738                      | 2.42E-13    | 8.827316616         | 5.957226829                 | 2.96E-20    | ECM_REGULATORS     | 1.121893176                | 1.481782861            |
| ADAMTS14        | 7.859058912         | 6.534747141                      | 8.30E-30    | 7.859058912         | 6.95734878                  | 1.14E-07    | ECM_REGULATORS     | 1.202656927                | 1.129605423            |
| ADAMTS2         | 9.875450151         | 9.391779411                      | 2.74E-05    | 9.875450151         | 8.178721951                 | 4.13E-10    | ECM_REGULATORS     | 1.051499372                | 1.207456398            |
| ADAMTS6         | 5.915548943         | 5.681847736                      | 0.019120835 | 5.915548943         | 4.083021951                 | 6.27E-14    | ECM_REGULATORS     | 1.041131198                | 1.448816346            |
| ADAMTSL5        | 7.413130514         | 6.033847598                      | 6.85E-36    | 7.413130514         | 6.445768293                 | 1.02E-09    | ECM_REGULATORS     | 1.228590944                | 1.150077101            |
| AGT             | 9.023667372         | 8.416494983                      | 0.002879375 | 9.023667372         | 7.708885366                 | 9.64E-08    | ECM_REGULATORS     | 1.072140765                | 1.1705541              |
| AMELX           | 2.045275529         | 0.194335534                      | 0           | 2.045275529         | 0.197573171                 | 1.75E-11    | ECM_GLYCOPROTEINS  | 10.52445475                | 10.35199021            |
| ANXA3           | 11.30661813         | 8.926245599                      | 7.35E-57    | 11.30661813         | 10.07511463                 | 3.17E-15    | ECM_AFFILIATED     | 1.266671189                | 1.122232207            |
| AREG            | 10.77660091         | 6.670819537                      | 1.18E-117   | 10.77660091         | 9.27405122                  | 1.58E-07    | SECRETED_FACTORS   | 1.615483802                | 1.16201654             |
| BMP4            | 10.69677372         | 7.75824932                       | 2.48E-165   | 10.69677372         | 9.416534146                 | 5.06E-10    | SECRETED_FACTORS   | 1.378761274                | 1.135956558            |
| BMP7            | 8.863184894         | 7.932301201                      | 1.25E-05    | 8.863184894         | 7.089192683                 | 6.20E-06    | SECRETED_FACTORS   | 1.117353548                | 1.250238961            |
| C1QTNF1         | 10.20027432         | 9.766051711                      | 6.53E-06    | 10.20027432         | 9.558597561                 | 4.01E-05    | ECM_AFFILIATED     | 1.044462452                | 1.067130848            |
| C1QTNF8         | 0.563191239         | 0.303833429                      | 2.30E-08    | 0.563191239         | 0.147185366                 | 0.007540941 | ECM_AFFILIATED     | 1.853618414                | 3.826407846            |
| CCL20           | 10.02366163         | 5.551004688                      | 9.28E-134   | 10.02366163         | 9.057821951                 | 0.000198205 | SECRETED_FACTORS   | 1.805738275                | 1.106630455            |
| CCL24           | 8.513945921         | 2.305375744                      | 0           | 8.513945921         | 7.465878049                 | 0.000451279 | SECRETED_FACTORS   | 3.693083847                | 1.14038106             |
| CCL26           | 3.72293716          | 3.004064052                      | 3.40E-11    | 3.72293716          | 2.553412195                 | 3.33E-06    | SECRETED_FACTORS   | 1.239300193                | 1.458024352            |
| CLEC6A          | 1.592246828         | 1.388828189                      | 0.018370693 | 1.592246828         | 0.915414634                 | 0.003456681 | ECM_AFFILIATED     | 1.146467821                | 1.739372267            |
| COL10A1         | 7.564254985         | 6.694443984                      | 2.55E-05    | 7.564254985         | 1.719041463                 | 5.12E-23    | COLLAGENS          | 1.129930283                | 4.400274889            |
| COL11A1         | 8.839041994         | 7.317275999                      | 1.66E-12    | 8.839041994         | 3.751768293                 | 4.07E-26    | COLLAGENS          | 1.207968921                | 2.355966921            |
| COL12A1         | 12.4029423          | 11.1207018                       | 6.56E-19    | 12.4029423          | 10.70771463                 | 1.20E-10    | COLLAGENS          | 1.115302121                | 1.158318345            |
| COL1A1          | 15.54729154         | 14.56758602                      | 1.43E-08    | 15.54729154         | 13.56163659                 | 7.39E-12    | COLLAGENS          | 1.067252427                | 1.14641706             |
| COL1A2          | 15.13475861         | 14.3745589                       | 4.38E-07    | 15.13475861         | 14.01686829                 | 9.94E-06    | COLLAGENS          | 1.052885081                | 1.079753216            |
| COL3A1          | 15.26913142         | 14.11161066                      | 3.51E-12    | 15.26913142         | 14.47818537                 | 0.001215621 | COLLAGENS          | 1.082026126                | 1.054630193            |
| COL4A1          | 13.36630846         | 13.10463265                      | 0.01485611  | 13.36630846         | 12.08233659                 | 5.96E-11    | COLLAGENS          | 1.019968191                | 1.106268507            |
| COL4A1          | 13.36630846         | 13.10463265                      | 0.01485611  | 13.36630846         | 12.08233659                 | 5.96E-11    | BASEMENT_MEMBRANES | 1.019968191                | 1.106268507            |
| COL5A1          | 12.62603625         | 11.66527755                      | 2.28E-12    | 12.62603625         | 11.35673415                 | 3.47E-08    | COLLAGENS          | 1.082360552                | 1.111766472            |
| COL5A2          | 12.07467795         | 11.39125581                      | 4.58E-08    | 12.07467795         | 10.70444146                 | 1.09E-08    | COLLAGENS          | 1.059995328                | 1.12800635             |
| COL6A3          | 13.54584381         | 12.4598605                       | 1.79E-12    | 13.54584381         | 12.94646829                 | 0.016257269 | BASEMENT_MEMBRANES | 1.087158544                | 1.046296449            |
| COL6A3          | 13.54584381         | 12.4598605                       | 1.79E-12    | 13.54584381         | 12.94646829                 | 0.016257269 | COLLAGENS          | 1.087158544                | 1.046296449            |
| COL9A3          | 8.182997281         | 6.830510682                      | 1.34E-21    | 8.182997281         | 6.703219512                 | 7.63E-06    | COLLAGENS          | 1.198006659                | 1.220756275            |
| CSF2            | 2.841800604         | 1.948265976                      | 2.95E-13    | 2.841800604         | 1.243990244                 | 2.35E-08    | SECRETED_FACTORS   | 1.458630721                | 2.284423546            |
| CSF3            | 4.576332628         | 2.809586086                      | 9.58E-29    | 4.576332628         | 3.166931707                 | 0.000190332 | SECRETED_FACTORS   | 1.628828051                | 1.445036727            |
| CST1            | 7.820570393         | 4.675118846                      | 5.03E-46    | 7.820570393         | 1.791290244                 | 5.44E-26    | ECM_REGULATORS     | 1.672806757                | 4.365886779            |
| CST4            | 2.665591541         | 2.050409364                      | 1.31E-05    | 2.665591541         | 0.15047561                  | 5.80E-14    | ECM_REGULATORS     | 1.300028954                | 17.71444253            |
| CSTL1           | 1.168087915         | 0.510782866                      | 5.51E-36    | 1.168087915         | 0.203880488                 | 5.99E-07    | ECM_REGULATORS     | 2.286858064                | 5.729277617            |
| CTSV            | 8.429963142         | 7.231072045                      | 4.07E-16    | 8.429963142         | 7.281407317                 | 6.29E-07    | ECM_REGULATORS     | 1.165797145                | 1.157738164            |
| CXCL1           | 10.25534773         | 6.556732015                      | 9.25E-96    | 10.25534773         | 7.884412195                 | 8.99E-15    | SECRETED_FACTORS   | 1.564094386                | 1.300711769            |
| CXCL11          | 7.610099698         | 6.342739488                      | 2.83E-17    | 7.610099698         | 5.055195122                 | 3.00E-11    | SECRETED_FACTORS   | 1.199812749                | 1.505401773            |

|          |             |             |             |             |             |             |                    |             |             |
|----------|-------------|-------------|-------------|-------------|-------------|-------------|--------------------|-------------|-------------|
| CXCL2    | 8.599125076 | 6.828612117 | 7.13E-36    | 8.599125076 | 6.915368293 | 1.59E-09    | SECRETED_FACTORS   | 1.259278595 | 1.243480421 |
| CXCL3    | 9.562309063 | 4.889910098 | 2.58E-275   | 9.562309063 | 7.143853659 | 6.46E-16    | SECRETED_FACTORS   | 1.955518378 | 1.338536527 |
| CXCL5    | 6.851458006 | 4.732781069 | 2.25E-32    | 6.851458006 | 3.568592683 | 4.19E-10    | SECRETED_FACTORS   | 1.447660034 | 1.919932762 |
| CXCL6    | 5.31704713  | 4.336360895 | 6.48E-08    | 5.31704713  | 3.923902439 | 2.09E-05    | SECRETED_FACTORS   | 1.226154201 | 1.355040604 |
| CXCL8    | 9.950111178 | 7.779989041 | 1.23E-44    | 9.950111178 | 6.867073171 | 1.50E-14    | SECRETED_FACTORS   | 1.2789364   | 1.448959539 |
| EPYC     | 3.160630514 | 2.536326265 | 6.88E-05    | 3.160630514 | 0.320021951 | 1.66E-10    | PROTEOGLYCANS      | 1.246145087 | 9.876292865 |
| EREG     | 9.240881873 | 3.905234524 | 2.70E-182   | 9.240881873 | 7.427312195 | 4.09E-05    | SECRETED_FACTORS   | 2.366280902 | 1.244175771 |
| F12      | 8.796860121 | 7.100190636 | 5.86E-34    | 8.796860121 | 7.947385366 | 5.23E-06    | ECM_REGULATORS     | 1.238961117 | 1.106887324 |
| FGF18    | 5.608446224 | 4.782199904 | 1.25E-10    | 5.608446224 | 4.12797561  | 3.13E-11    | SECRETED_FACTORS   | 1.172775362 | 1.358643256 |
| FGF19    | 3.81191571  | 1.643065402 | 5.40E-51    | 3.81191571  | 0.581517073 | 1.37E-11    | SECRETED_FACTORS   | 2.320002421 | 6.555122602 |
| FGF20    | 2.132281571 | 1.844686926 | 0.005489186 | 2.132281571 | 0.345326829 | 2.80E-06    | SECRETED_FACTORS   | 1.155904311 | 6.174676829 |
| FGF23    | 0.853424773 | 0.469638924 | 3.47E-10    | 0.853424773 | 0.18964878  | 0.006894498 | SECRETED_FACTORS   | 1.817193442 | 4.500027742 |
| FGF3     | 0.758840181 | 0.3792103   | 1.15E-07    | 0.758840181 | 0.061429268 | 0.00362738  | SECRETED_FACTORS   | 2.001106462 | 12.35307212 |
| GPC4     | 11.06736163 | 9.843267751 | 1.43E-22    | 11.06736163 | 10.66705854 | 0.004812882 | ECM_AFFILIATED     | 1.124358487 | 1.037527036 |
| HTRA3    | 10.08740272 | 9.118383418 | 1.46E-12    | 10.08740272 | 9.320917073 | 0.001038068 | ECM_REGULATORS     | 1.106270954 | 1.082232858 |
| LAMB1    | 12.69793565 | 12.17469109 | 3.04E-08    | 12.69793565 | 12.31526098 | 0.001056658 | BASEMENT_MEMBRANES | 1.042978056 | 1.031073209 |
| LAMB1    | 12.69793565 | 12.17469109 | 3.04E-08    | 12.69793565 | 12.31526098 | 0.001056658 | ECM_GLYCOPROTEINS  | 1.042978056 | 1.031073209 |
| LAMC2    | 12.4503994  | 9.831347513 | 1.14E-32    | 12.4503994  | 11.65961463 | 3.70E-07    | ECM_GLYCOPROTEINS  | 1.266398058 | 1.067822547 |
| LAMC2    | 12.4503994  | 9.831347513 | 1.14E-32    | 12.4503994  | 11.65961463 | 3.70E-07    | BASEMENT_MEMBRANES | 1.266398058 | 1.067822547 |
| LOXL2    | 10.62957855 | 10.07428463 | 1.70E-08    | 10.62957855 | 9.347885366 | 1.00E-11    | ECM_REGULATORS     | 1.055119936 | 1.137110494 |
| MMP1     | 9.955311178 | 6.627750723 | 6.42E-51    | 9.955311178 | 6.787319512 | 1.64E-13    | ECM_REGULATORS     | 1.502064817 | 1.466751515 |
| MMP10    | 5.406912387 | 4.533528019 | 2.08E-05    | 5.406912387 | 3.13967561  | 2.39E-09    | ECM_REGULATORS     | 1.192650043 | 1.722124531 |
| MMP11    | 11.20469879 | 9.858270961 | 5.55E-17    | 11.20469879 | 8.025609756 | 6.72E-22    | ECM_REGULATORS     | 1.136578497 | 1.396118069 |
| MMP12    | 9.839807855 | 5.270708918 | 2.90E-104   | 9.839807855 | 8.746031707 | 0.000668816 | ECM_REGULATORS     | 1.866885083 | 1.125059705 |
| MMP20    | 0.908372508 | 0.592134173 | 1.57E-06    | 0.908372508 | 0.294458537 | 0.002182214 | ECM_REGULATORS     | 1.534065333 | 3.084891062 |
| MMP3     | 8.497773414 | 4.142292602 | 8.26E-97    | 8.497773414 | 4.818139024 | 8.27E-15    | ECM_REGULATORS     | 2.051466236 | 1.763704486 |
| MMP7     | 8.937566767 | 8.135262776 | 0.000503342 | 8.937566767 | 2.8683      | 4.91E-27    | ECM_REGULATORS     | 1.098620538 | 3.115980465 |
| MMP8     | 2.568664048 | 1.926423533 | 5.31E-07    | 2.568664048 | 0.532968293 | 7.74E-09    | ECM_REGULATORS     | 1.333384899 | 4.819543833 |
| MMP9     | 10.01092961 | 9.293933642 | 8.68E-06    | 10.01092961 | 9.1798      | 0.004315545 | ECM_REGULATORS     | 1.077146663 | 1.090538967 |
| MUC5AC   | 6.66353716  | 2.53302771  | 1.23E-100   | 6.66353716  | 4.263578049 | 5.03E-05    | ECM_AFFILIATED     | 2.63066098  | 1.562897896 |
| MXRA5    | 11.20178882 | 10.90338756 | 0.037003251 | 11.20178882 | 10.55420732 | 0.00922954  | ECM_GLYCOPROTEINS  | 1.027367757 | 1.061357664 |
| NID2     | 9.39686284  | 9.115427105 | 0.009912174 | 9.39686284  | 8.794329268 | 0.000836664 | BASEMENT_MEMBRANES | 1.030874662 | 1.068513874 |
| NID2     | 9.39686284  | 9.115427105 | 0.009912174 | 9.39686284  | 8.794329268 | 0.000836664 | ECM_GLYCOPROTEINS  | 1.030874662 | 1.068513874 |
| OVGP1    | 7.185370695 | 6.287084938 | 1.20E-21    | 7.185370695 | 5.874529268 | 4.55E-15    | ECM_AFFILIATED     | 1.142877942 | 1.223139824 |
| PLOD3    | 12.43899607 | 11.61495715 | 1.62E-45    | 12.43899607 | 11.62421707 | 6.86E-13    | ECM_REGULATORS     | 1.070946359 | 1.070093237 |
| PODNL1   | 7.261954985 | 6.538444441 | 5.79E-09    | 7.261954985 | 6.171687805 | 5.74E-09    | PROTEOGLYCANS      | 1.110654843 | 1.176656243 |
| POSTN    | 11.76367221 | 10.68835551 | 6.50E-08    | 11.76367221 | 11.15212195 | 0.038804147 | ECM_GLYCOPROTEINS  | 1.100606375 | 1.05483712  |
| PRSS1    | 2.28724139  | 1.947603848 | 0.046862798 | 2.28724139  | 0.540290244 | 2.58E-05    | ECM_REGULATORS     | 1.174387385 | 4.23356822  |
| PRSS2    | 4.922577644 | 2.974642102 | 5.17E-23    | 4.922577644 | 2.596470732 | 9.95E-05    | ECM_REGULATORS     | 1.654847028 | 1.895872572 |
| REG1A    | 8.510999396 | 2.150232005 | 6.82E-211   | 8.510999396 | 5.872134146 | 0.000587104 | ECM_AFFILIATED     | 3.958177247 | 1.449387767 |
| REG1B    | 5.172576133 | 0.604387787 | 3.35E-322   | 5.172576133 | 2.999946341 | 0.001892955 | ECM_AFFILIATED     | 8.558373025 | 1.724222884 |
| REG3A    | 6.572507553 | 0.691989679 | 0           | 6.572507553 | 4.018180488 | 0.0003001   | ECM_AFFILIATED     | 9.497984945 | 1.635692466 |
| SDC4     | 13.11104139 | 12.80251828 | 0.001697108 | 13.11104139 | 12.69398537 | 9.57E-05    | ECM_AFFILIATED     | 1.024098627 | 1.032854617 |
| SERPINA4 | 3.353470091 | 2.266563977 | 2.52E-08    | 3.353470091 | 0.267243902 | 4.51E-15    | ECM_REGULATORS     | 1.479539128 | 12.54835025 |
| SERPINA7 | 2.670365861 | 1.114846407 | 2.51E-23    | 2.670365861 | 1.594773171 | 0.006112327 | ECM_REGULATORS     | 2.395276913 | 1.674448699 |
| SERPINB5 | 9.648550151 | 5.535738191 | 1.08E-51    | 9.648550151 | 6.890763415 | 4.47E-12    | ECM_REGULATORS     | 1.742956372 | 1.400214979 |



|                 |             |             |             |             |             |             |                   |             |             |
|-----------------|-------------|-------------|-------------|-------------|-------------|-------------|-------------------|-------------|-------------|
| <b>SERPINE2</b> | 11.14265921 | 10.74347755 | 0.002672357 | 11.14265921 | 10.10229756 | 2.84E-07    | ECM_REGULATORS    | 1.037155722 | 1.102982678 |
| <b>SFTA2</b>    | 4.350291239 | 2.87030541  | 6.62E-14    | 4.350291239 | 0.296768293 | 5.28E-21    | ECM_AFFILIATED    | 1.515619635 | 14.65888151 |
| <b>SPON2</b>    | 10.79167492 | 10.24663644 | 2.91E-05    | 10.79167492 | 9.972619512 | 5.78E-07    | ECM_GLYCOPROTEINS | 1.053191942 | 1.082130418 |
| <b>SRPX2</b>    | 8.940777644 | 7.587607153 | 1.60E-25    | 8.940777644 | 6.808426829 | 3.25E-13    | ECM_GLYCOPROTEINS | 1.178339556 | 1.313192881 |
| <b>SULF1</b>    | 12.01272296 | 10.89942983 | 6.75E-16    | 12.01272296 | 10.49467317 | 4.47E-07    | ECM_REGULATORS    | 1.102142328 | 1.144649554 |
| <b>TGFBI</b>    | 14.18545408 | 12.17238885 | 1.43E-71    | 14.18545408 | 11.77384634 | 4.14E-22    | ECM_GLYCOPROTEINS | 1.165379635 | 1.204827519 |
| <b>TSPEAR</b>   | 4.051556193 | 2.483923895 | 5.12E-41    | 4.051556193 | 2.607041463 | 4.28E-05    | ECM_GLYCOPROTEINS | 1.631111244 | 1.554081993 |
| <b>WISP1</b>    | 7.612747432 | 7.255730357 | 0.005976733 | 7.612747432 | 5.250046341 | 6.38E-16    | ECM_GLYCOPROTEINS | 1.049204843 | 1.450034331 |
| <b>WNT11</b>    | 7.739306647 | 5.899689413 | 2.45E-43    | 7.739306647 | 6.9725      | 0.030773984 | SECRETED_FACTORS  | 1.311815946 | 1.109975855 |
| <b>WNT2</b>     | 7.172414804 | 5.44718666  | 1.35E-24    | 7.172414804 | 2.466446341 | 2.63E-32    | SECRETED_FACTORS  | 1.316719116 | 2.907995476 |
| <b>WNT8B</b>    | 2.009831722 | 1.719004804 | 0.000761904 | 2.009831722 | 0.780387805 | 1.30E-07    | SECRETED_FACTORS  | 1.169183307 | 2.57542687  |
| <b>VWA2</b>     | 8.487925076 | 5.360233535 | 5.86E-76    | 8.487925076 | 5.181985366 | 1.33E-24    | ECM_GLYCOPROTEINS | 1.583499118 | 1.637967782 |
| <b>VWA9</b>     | 10.72670453 | 10.61265181 | 6.57E-06    | 10.72670453 | 10.5460878  | 0.001727008 | ECM_GLYCOPROTEINS | 1.010746864 | 1.01712642  |
| <b>ZP3</b>      | 8.696715408 | 7.783635916 | 1.42E-28    | 8.696715408 | 7.458843902 | 6.69E-10    | ECM_GLYCOPROTEINS | 1.11730758  | 1.165960237 |

**Esophageal Carcinoma (ESCA)**

| Signature genes | Expression in tumor | Expression in rest of Pan-Cancer | P-value     | Expression in tumor | Expression in normal tissue | P-value     | Matrisome category | Fold change vs. Pan-Cancer | Fold change vs. normal |
|-----------------|---------------------|----------------------------------|-------------|---------------------|-----------------------------|-------------|--------------------|----------------------------|------------------------|
| ACAN            | 7.643793846         | 6.323319026                      | 2.99E-14    | 7.643793846         | 5.261592308                 | 1.84E-05    | PROTEOGLYCANS      | 1.208826222                | 1.452752969            |
| ADAM10          | 12.65238103         | 12.04475783                      | 5.54E-30    | 12.65238103         | 12.09913846                 | 0.004309001 | ECM_REGULATORS     | 1.050447107                | 1.045725782            |
| ADAM12          | 9.459065128         | 8.421758121                      | 3.79E-08    | 9.459065128         | 6.0994                      | 1.84E-08    | ECM_REGULATORS     | 1.123169888                | 1.550818954            |
| ADAM17          | 11.16374154         | 10.20838575                      | 6.92E-30    | 11.16374154         | 10.15537692                 | 0.000134765 | ECM_REGULATORS     | 1.093585393                | 1.099293667            |
| ADAM8           | 9.872030769         | 8.821557749                      | 4.86E-16    | 9.872030769         | 8.428230769                 | 0.000716041 | ECM_REGULATORS     | 1.119080218                | 1.171305229            |
| ADAMDEC1        | 7.070861026         | 5.850329943                      | 3.14E-10    | 7.070861026         | 4.6466                      | 3.98E-05    | ECM_REGULATORS     | 1.208626025                | 1.521727936            |
| ADAMTS12        | 9.607984615         | 7.868232738                      | 1.45E-24    | 9.607984615         | 6.631392308                 | 2.98E-08    | ECM_REGULATORS     | 1.221110882                | 1.448863854            |
| ADAMTS14        | 8.415809744         | 6.534747141                      | 4.92E-35    | 8.415809744         | 6.572523077                 | 1.59E-05    | ECM_REGULATORS     | 1.287855454                | 1.280453434            |
| ADAMTS2         | 10.79261026         | 9.391779411                      | 8.54E-21    | 10.79261026         | 9.175669231                 | 0.000593237 | ECM_REGULATORS     | 1.149154999                | 1.176220501            |
| ADAMTS20        | 3.727416923         | 1.790075893                      | 2.38E-30    | 3.727416923         | 1.073938462                 | 0.002775868 | ECM_REGULATORS     | 2.082267538                | 3.470791909            |
| ADAMTS6         | 6.928011282         | 5.681847736                      | 6.29E-22    | 6.928011282         | 5.974030769                 | 0.020367439 | ECM_REGULATORS     | 1.219323643                | 1.159687914            |
| ADAMTS7         | 9.147463077         | 8.00658547                       | 3.75E-24    | 9.147463077         | 8.211084615                 | 0.003296582 | ECM_REGULATORS     | 1.142492403                | 1.11403834             |
| ADAMTSL5        | 8.596593333         | 6.033847598                      | 1.73E-70    | 8.596593333         | 7.807423077                 | 0.04897076  | ECM_REGULATORS     | 1.424728284                | 1.101079479            |
| AGRN            | 14.51676205         | 13.28611182                      | 1.98E-38    | 14.51676205         | 13.42239231                 | 0.000229687 | BASEMENT_MEMBRANES | 1.092626816                | 1.081533136            |
| AGRN            | 14.51676205         | 13.28611182                      | 1.98E-38    | 14.51676205         | 13.42239231                 | 0.000229687 | ECM_GLYCOPROTEINS  | 1.092626816                | 1.081533136            |
| AMH             | 6.30182             | 4.78537348                       | 4.52E-18    | 6.30182             | 5.143623077                 | 0.048902531 | SECRETED_FACTORS   | 1.316891989                | 1.225171422            |
| ANGPT2          | 9.245981538         | 8.572867687                      | 7.52E-09    | 9.245981538         | 7.494123077                 | 1.76E-07    | SECRETED_FACTORS   | 1.078516767                | 1.233764304            |
| ANXA2           | 15.50781077         | 14.42235591                      | 4.19E-22    | 15.50781077         | 14.38373846                 | 8.68E-05    | ECM_AFFILIATED     | 1.075261966                | 1.078148828            |
| ANXA8           | 9.253132308         | 5.867657451                      | 1.82E-25    | 9.253132308         | 5.756746154                 | 0.002675698 | ECM_AFFILIATED     | 1.576972137                | 1.607354582            |
| ANXA8L1         | 9.189085128         | 5.816157217                      | 2.97E-32    | 9.189085128         | 6.7563                      | 0.01558048  | ECM_AFFILIATED     | 1.579923786                | 1.36007654             |
| ARTN            | 6.935233333         | 5.510244494                      | 8.63E-19    | 6.935233333         | 5.3514                      | 0.020226771 | SECRETED_FACTORS   | 1.258607189                | 1.295966165            |
| ASPN            | 9.32468             | 8.261593676                      | 4.83E-09    | 9.32468             | 8.150392308                 | 0.014657761 | PROTEOGLYCANS      | 1.128678118                | 1.144077444            |
| BGN             | 13.61419897         | 13.22871855                      | 0.008277135 | 13.61419897         | 11.42556154                 | 1.01E-06    | PROTEOGLYCANS      | 1.029139665                | 1.191556225            |
| BMP1            | 11.37506872         | 10.62402635                      | 3.19E-20    | 11.37506872         | 10.10366154                 | 1.11E-05    | ECM_REGULATORS     | 1.070692819                | 1.12583628             |
| BMP8A           | 6.619213846         | 4.035349936                      | 2.96E-87    | 6.619213846         | 5.049584615                 | 0.000271714 | SECRETED_FACTORS   | 1.640307272                | 1.310843238            |
| BMP8B           | 8.798971795         | 7.691986097                      | 9.82E-19    | 8.798971795         | 7.993153846                 | 0.024670619 | SECRETED_FACTORS   | 1.143914157                | 1.100813517            |
| CCL18           | 8.447629744         | 6.923515264                      | 4.76E-10    | 8.447629744         | 6.628276923                 | 0.005119934 | SECRETED_FACTORS   | 1.220135931                | 1.274483526            |
| CCL20           | 9.324222051         | 5.551004688                      | 6.37E-58    | 9.324222051         | 5.799869231                 | 5.26E-06    | SECRETED_FACTORS   | 1.679735935                | 1.607660739            |
| CCL22           | 7.501091282         | 5.887581409                      | 1.14E-20    | 7.501091282         | 5.984853846                 | 0.002273717 | SECRETED_FACTORS   | 1.274053089                | 1.253345775            |
| CCL24           | 4.503682051         | 2.305375744                      | 3.21E-48    | 4.503682051         | 3.019338462                 | 0.007277726 | SECRETED_FACTORS   | 1.953556622                | 1.491612189            |
| CCL26           | 4.098959487         | 3.004064052                      | 8.79E-15    | 4.098959487         | 1.924653846                 | 7.50E-05    | SECRETED_FACTORS   | 1.364471402                | 2.129712569            |
| CCL7            | 2.627906667         | 2.256527657                      | 0.013414109 | 2.627906667         | 0.983615385                 | 0.003675837 | SECRETED_FACTORS   | 1.164579862                | 2.671681134            |
| CD109           | 11.27835179         | 9.848226658                      | 2.26E-23    | 11.27835179         | 9.809415385                 | 0.012645181 | ECM_REGULATORS     | 1.145216513                | 1.1497476              |
| CLEC2B          | 8.854177436         | 8.265322842                      | 3.56E-07    | 8.854177436         | 7.797076923                 | 0.034212678 | ECM_AFFILIATED     | 1.071243992                | 1.135576515            |
| CLEC6A          | 1.674436923         | 1.388828189                      | 0.010584461 | 1.674436923         | 0.691453846                 | 0.019673636 | ECM_AFFILIATED     | 1.205647276                | 2.421617773            |
| CLEC7A          | 8.254169231         | 7.78728395                       | 0.000295486 | 8.254169231         | 6.634223077                 | 0.000783286 | ECM_AFFILIATED     | 1.059954829                | 1.244180236            |
| CNTF            | 5.009567179         | 4.014342028                      | 2.58E-24    | 5.009567179         | 4.416807692                 | 0.028729978 | SECRETED_FACTORS   | 1.247917378                | 1.13420541             |
| COCH            | 7.885620513         | 6.377181409                      | 2.23E-16    | 7.885620513         | 6.044215385                 | 0.00418985  | ECM_GLYCOPROTEINS  | 1.23653696                 | 1.304655776            |
| COL10A1         | 8.241527179         | 6.694443984                      | 6.84E-09    | 8.241527179         | 3.686184615                 | 2.75E-07    | COLLAGENS          | 1.23109958                 | 2.235787959            |
| COL12A1         | 13.29082564         | 11.1207018                       | 6.52E-31    | 13.29082564         | 11.90566154                 | 0.000969624 | COLLAGENS          | 1.195142706                | 1.116344993            |
| COL13A1         | 7.078155897         | 6.342576509                      | 1.41E-07    | 7.078155897         | 6.377892308                 | 0.022021592 | COLLAGENS          | 1.115974855                | 1.109795455            |
| COL18A1         | 13.22397231         | 12.91779311                      | 0.004805203 | 13.22397231         | 12.44866923                 | 0.004415298 | BASEMENT_MEMBRANES | 1.023702129                | 1.062279997            |

|         |             |             |             |             |             |             |                    |             |             |
|---------|-------------|-------------|-------------|-------------|-------------|-------------|--------------------|-------------|-------------|
| COL18A1 | 13.22397231 | 12.91779311 | 0.004805203 | 13.22397231 | 12.44866923 | 0.004415298 | COLLAGENS          | 1.023702129 | 1.062279997 |
| COL1A1  | 16.57822103 | 14.56758602 | 3.95E-19    | 16.57822103 | 14.09875385 | 4.34E-06    | COLLAGENS          | 1.138021152 | 1.175864279 |
| COL1A2  | 15.62648359 | 14.3745589  | 1.60E-10    | 15.62648359 | 14.12480769 | 0.001849271 | COLLAGENS          | 1.087093086 | 1.106314785 |
| COL24A1 | 6.323890769 | 5.296083259 | 3.58E-12    | 6.323890769 | 4.541546154 | 0.000602171 | COLLAGENS          | 1.194069364 | 1.392453265 |
| COL27A1 | 11.07643077 | 9.554815529 | 1.41E-31    | 11.07643077 | 9.812953846 | 0.000444242 | COLLAGENS          | 1.159251137 | 1.128756024 |
| COL3A1  | 15.67227692 | 14.11161066 | 5.75E-13    | 15.67227692 | 14.07846923 | 0.001244422 | COLLAGENS          | 1.110594481 | 1.113208877 |
| COL4A1  | 14.2105159  | 13.10463265 | 2.59E-15    | 14.2105159  | 12.99077692 | 0.000446812 | COLLAGENS          | 1.084388725 | 1.093892689 |
| COL4A1  | 14.2105159  | 13.10463265 | 2.59E-15    | 14.2105159  | 12.99077692 | 0.000446812 | BASEMENT_MEMBRANES | 1.084388725 | 1.093892689 |
| COL4A2  | 14.30296513 | 13.38834677 | 1.43E-11    | 14.30296513 | 13.54701538 | 0.024448104 | COLLAGENS          | 1.068314511 | 1.05580194  |
| COL4A2  | 14.30296513 | 13.38834677 | 1.43E-11    | 14.30296513 | 13.54701538 | 0.024448104 | BASEMENT_MEMBRANES | 1.068314511 | 1.05580194  |
| COL5A1  | 13.31153949 | 11.66527755 | 2.70E-20    | 13.31153949 | 11.85597692 | 0.002323144 | COLLAGENS          | 1.141124969 | 1.122770361 |
| COL5A2  | 12.83734    | 11.39125581 | 5.96E-19    | 12.83734    | 11.10731538 | 9.28E-05    | COLLAGENS          | 1.126946863 | 1.155755424 |
| COL5A3  | 10.44755179 | 9.425908801 | 8.51E-14    | 10.44755179 | 8.729923077 | 8.62E-05    | COLLAGENS          | 1.108386683 | 1.196751873 |
| COL6A3  | 14.29269231 | 12.4598605  | 6.10E-20    | 14.29269231 | 13.12082308 | 0.010579034 | COLLAGENS          | 1.147098903 | 1.089313698 |
| COL6A3  | 14.29269231 | 12.4598605  | 6.10E-20    | 14.29269231 | 13.12082308 | 0.010579034 | BASEMENT_MEMBRANES | 1.147098903 | 1.089313698 |
| COL7A1  | 12.11862769 | 9.209955931 | 6.14E-49    | 12.11862769 | 8.9184      | 3.21E-07    | COLLAGENS          | 1.315818206 | 1.358834286 |
| COL8A1  | 10.2832759  | 9.734282292 | 0.005138472 | 10.2832759  | 9.165130769 | 0.040399215 | COLLAGENS          | 1.056397954 | 1.12199991  |
| CRLF3   | 10.00320718 | 8.988405963 | 8.58E-57    | 10.00320718 | 9.129569231 | 3.26E-06    | SECRETED_FACTORS   | 1.112901133 | 1.095693228 |
| CSF2    | 3.875177949 | 1.948265976 | 1.74E-33    | 3.875177949 | 1.0002      | 5.76E-06    | SECRETED_FACTORS   | 1.989039483 | 3.874403068 |
| CST1    | 9.169130769 | 4.675118846 | 1.83E-55    | 9.169130769 | 3.910076923 | 2.96E-08    | ECM_REGULATORS     | 1.961261536 | 2.345000098 |
| CST2    | 4.52867641  | 3.474976626 | 2.73E-07    | 4.52867641  | 2.618392308 | 0.001778224 | ECM_REGULATORS     | 1.303224999 | 1.729563747 |
| CST4    | 2.929877436 | 2.050409364 | 1.63E-06    | 2.929877436 | 0.6525      | 0.000609483 | ECM_REGULATORS     | 1.428923164 | 4.490233618 |
| CST6    | 5.763257436 | 5.121371418 | 0.008089193 | 5.763257436 | 3.543061538 | 0.005731374 | ECM_REGULATORS     | 1.125334791 | 1.626632045 |
| CSTL1   | 1.590729231 | 0.510782866 | 4.92E-57    | 1.590729231 | 0.480353846 | 0.002325061 | ECM_REGULATORS     | 3.114296383 | 3.311578003 |
| CTHRC1  | 10.02414308 | 9.01501605  | 7.30E-08    | 10.02414308 | 6.8966      | 2.83E-09    | ECM_GLYCOPROTEINS  | 1.111938461 | 1.453490572 |
| CTSA    | 13.13848359 | 12.74033457 | 2.40E-09    | 13.13848359 | 12.61066154 | 0.015929984 | ECM_REGULATORS     | 1.031251065 | 1.041855223 |
| CTSB    | 15.56231949 | 15.24836909 | 0.000752586 | 15.56231949 | 14.597      | 0.001986708 | ECM_REGULATORS     | 1.020589113 | 1.066131362 |
| CTSC    | 12.99329077 | 12.11148266 | 8.86E-15    | 12.99329077 | 11.64567692 | 5.81E-05    | ECM_REGULATORS     | 1.07280761  | 1.115717949 |
| CTSK    | 10.85443128 | 10.28017202 | 0.000168625 | 10.85443128 | 10.0544     | 0.048746984 | ECM_REGULATORS     | 1.055860861 | 1.079570266 |
| CTSV    | 9.786259487 | 7.231072045 | 3.06E-40    | 9.786259487 | 7.323623077 | 2.83E-06    | ECM_REGULATORS     | 1.353362188 | 1.336259306 |
| CXCL1   | 10.37594872 | 6.556732015 | 2.38E-61    | 10.37594872 | 6.772238462 | 1.49E-07    | SECRETED_FACTORS   | 1.582487845 | 1.532129853 |
| CXCL10  | 8.794414872 | 8.345707122 | 0.023492332 | 8.794414872 | 5.888746154 | 3.01E-05    | SECRETED_FACTORS   | 1.053765097 | 1.493427402 |
| CXCL11  | 7.359250256 | 6.342739488 | 1.66E-07    | 7.359250256 | 4.918738462 | 0.000454182 | SECRETED_FACTORS   | 1.16026368  | 1.496166205 |
| CXCL13  | 7.768841026 | 6.191608355 | 1.56E-10    | 7.768841026 | 5.860576923 | 0.012527552 | SECRETED_FACTORS   | 1.254737151 | 1.325610282 |
| CXCL3   | 8.128645641 | 4.889910098 | 9.14E-83    | 8.128645641 | 6.661115385 | 0.037461614 | SECRETED_FACTORS   | 1.662330284 | 1.220312991 |
| CXCL5   | 7.430538462 | 4.732781069 | 1.99E-31    | 7.430538462 | 4.559953846 | 0.001561149 | SECRETED_FACTORS   | 1.570015252 | 1.629520542 |
| CXCL6   | 7.748362564 | 4.336360895 | 6.49E-47    | 7.748362564 | 4.690661538 | 1.02E-05    | SECRETED_FACTORS   | 1.786835264 | 1.651869891 |
| CXCL8   | 10.52959385 | 7.779989041 | 8.67E-43    | 10.52959385 | 6.636138462 | 7.46E-09    | SECRETED_FACTORS   | 1.353420139 | 1.586704965 |
| CXCL9   | 9.897547692 | 8.857239179 | 1.61E-06    | 9.897547692 | 7.860130769 | 0.003246439 | SECRETED_FACTORS   | 1.11745291  | 1.259209036 |
| DMP1    | 3.902303077 | 1.378079634 | 9.55E-116   | 3.902303077 | 1.283884615 | 9.10E-05    | ECM_GLYCOPROTEINS  | 2.831696355 | 3.039449987 |
| DSPP    | 3.108010256 | 0.492041358 | 0           | 3.108010256 | 0.758930769 | 0.000393852 | ECM_GLYCOPROTEINS  | 6.316563035 | 4.095248714 |
| EGFL6   | 8.462397436 | 5.7928      | 1.80E-32    | 8.462397436 | 6.717638462 | 1.59E-05    | SECRETED_FACTORS   | 1.460847507 | 1.259728026 |
| ELFN1   | 7.575115385 | 6.692110066 | 1.48E-10    | 7.575115385 | 6.558007692 | 0.007356338 | ECM_AFFILIATED     | 1.13194722  | 1.155094007 |
| EREG    | 8.442176923 | 3.905234524 | 2.47E-81    | 8.442176923 | 6.499692308 | 0.021713566 | SECRETED_FACTORS   | 2.161759267 | 1.298857934 |
| F12     | 8.602102564 | 7.100190636 | 1.31E-16    | 8.602102564 | 5.777684615 | 7.06E-10    | ECM_REGULATORS     | 1.211531212 | 1.48884945  |
| FGF11   | 8.306902051 | 7.804446418 | 0.001729826 | 8.306902051 | 6.633007692 | 0.004541305 | SECRETED_FACTORS   | 1.064380688 | 1.252358272 |

|        |             |             |             |             |             |             |                    |             |             |
|--------|-------------|-------------|-------------|-------------|-------------|-------------|--------------------|-------------|-------------|
| FGF19  | 4.355058462 | 1.643065402 | 3.14E-47    | 4.355058462 | 1.608546154 | 0.009144709 | SECRETED_FACTORS   | 2.650569148 | 2.70745011  |
| FNDC1  | 9.045342564 | 8.021472757 | 5.97E-06    | 9.045342564 | 6.787546154 | 0.000427981 | ECM_GLYCOPROTEINS  | 1.127641125 | 1.332638093 |
| GPC1   | 12.90311949 | 11.63795591 | 3.29E-29    | 12.90311949 | 11.77865385 | 0.031875166 | ECM_AFFILIATED     | 1.108710119 | 1.095466397 |
| HAPLN3 | 8.90456359  | 8.519183557 | 0.003439171 | 8.90456359  | 7.391823077 | 9.90E-06    | PROTEOGLYCANS      | 1.045236733 | 1.20465053  |
| HPSE   | 9.290810769 | 7.671407813 | 1.75E-47    | 9.290810769 | 7.892838462 | 2.00E-05    | ECM_REGULATORS     | 1.211095929 | 1.177119083 |
| HTRA3  | 10.63171897 | 9.118383418 | 1.97E-17    | 10.63171897 | 9.672338462 | 0.033686128 | ECM_REGULATORS     | 1.165965335 | 1.099188063 |
| IBSP   | 4.902907179 | 3.204938584 | 8.29E-19    | 4.902907179 | 0.768992308 | 6.26E-10    | ECM_GLYCOPROTEINS  | 1.529797545 | 6.375755818 |
| ITIH6  | 4.151086154 | 2.729944452 | 3.62E-11    | 4.151086154 | 1.619492308 | 1.15E-05    | ECM_REGULATORS     | 1.520575318 | 2.563202143 |
| LAMA3  | 12.86893538 | 9.61444257  | 3.57E-63    | 12.86893538 | 11.86246923 | 0.033773012 | BASEMENT_MEMBRANES | 1.338500417 | 1.084844574 |
| LAMA3  | 12.86893538 | 9.61444257  | 3.57E-63    | 12.86893538 | 11.86246923 | 0.033773012 | ECM_GLYCOPROTEINS  | 1.338500417 | 1.084844574 |
| LAMA5  | 14.04234051 | 12.30493433 | 7.92E-66    | 14.04234051 | 13.42252308 | 0.02035747  | ECM_GLYCOPROTEINS  | 1.141195892 | 1.046177416 |
| LAMA5  | 14.04234051 | 12.30493433 | 7.92E-66    | 14.04234051 | 13.42252308 | 0.02035747  | BASEMENT_MEMBRANES | 1.141195892 | 1.046177416 |
| LAMB3  | 13.83676308 | 10.59206818 | 4.34E-54    | 13.83676308 | 11.90557692 | 0.000136215 | ECM_GLYCOPROTEINS  | 1.306332517 | 1.162208532 |
| LAMB3  | 13.83676308 | 10.59206818 | 4.34E-54    | 13.83676308 | 11.90557692 | 0.000136215 | BASEMENT_MEMBRANES | 1.306332517 | 1.162208532 |
| LAMC2  | 13.7035041  | 9.831347513 | 2.12E-41    | 13.7035041  | 11.45524615 | 1.74E-05    | ECM_GLYCOPROTEINS  | 1.393858175 | 1.196264482 |
| LAMC2  | 13.7035041  | 9.831347513 | 2.12E-41    | 13.7035041  | 11.45524615 | 1.74E-05    | BASEMENT_MEMBRANES | 1.393858175 | 1.196264482 |
| LAMC3  | 8.370059487 | 7.867710874 | 0.00082982  | 8.370059487 | 7.141546154 | 0.008564238 | BASEMENT_MEMBRANES | 1.063849399 | 1.17202344  |
| LAMC3  | 8.370059487 | 7.867710874 | 0.00082982  | 8.370059487 | 7.141546154 | 0.008564238 | ECM_GLYCOPROTEINS  | 1.063849399 | 1.17202344  |
| LGALS7 | 6.538820513 | 2.682360013 | 5.61E-59    | 6.538820513 | 3.982892308 | 0.030853475 | ECM_AFFILIATED     | 2.437711747 | 1.641726667 |
| LGALS8 | 11.95496564 | 11.28158572 | 5.82E-25    | 11.95496564 | 11.44238462 | 0.005836635 | ECM_AFFILIATED     | 1.05968841  | 1.044796696 |
| LOX    | 10.65215179 | 9.477059811 | 4.20E-14    | 10.65215179 | 9.4727      | 0.006010146 | ECM_REGULATORS     | 1.123993307 | 1.124510625 |
| LOXL2  | 11.20392256 | 10.07428463 | 1.25E-18    | 11.20392256 | 9.537892308 | 2.00E-05    | ECM_REGULATORS     | 1.112130834 | 1.174674887 |
| LUM    | 13.26252718 | 11.42934962 | 1.70E-15    | 13.26252718 | 12.04977692 | 0.005189877 | PROTEOGLYCANS      | 1.160392115 | 1.100645038 |
| MFAP2  | 9.897047692 | 9.073903157 | 4.66E-05    | 9.897047692 | 7.241015385 | 2.79E-07    | ECM_GLYCOPROTEINS  | 1.090715596 | 1.366803848 |
| MMP1   | 11.52730256 | 6.627750723 | 9.65E-65    | 11.52730256 | 7.633846154 | 2.28E-07    | ECM_REGULATORS     | 1.739248057 | 1.510025527 |
| MMP10  | 7.774604615 | 4.533528019 | 1.12E-33    | 7.774604615 | 3.959538462 | 1.76E-06    | ECM_REGULATORS     | 1.714912665 | 1.963512841 |
| MMP11  | 11.27450103 | 9.858270961 | 1.25E-11    | 11.27450103 | 7.165853846 | 1.81E-09    | ECM_REGULATORS     | 1.143659073 | 1.573364636 |
| MMP12  | 9.635189744 | 5.270708918 | 1.28E-57    | 9.635189744 | 5.363907692 | 9.68E-10    | ECM_REGULATORS     | 1.828063339 | 1.796300439 |
| MMP13  | 6.751493846 | 4.357289753 | 1.04E-15    | 6.751493846 | 2.191946154 | 7.79E-06    | ECM_REGULATORS     | 1.549470939 | 3.080136724 |
| MMP14  | 13.57414615 | 12.90987096 | 2.51E-07    | 13.57414615 | 12.15228462 | 3.67E-06    | ECM_REGULATORS     | 1.051454828 | 1.11700364  |
| MMP20  | 1.108764615 | 0.592134173 | 1.54E-09    | 1.108764615 | 0.253861538 | 0.038620348 | ECM_REGULATORS     | 1.872488814 | 4.367595903 |
| MMP25  | 7.002941026 | 6.268618718 | 1.43E-11    | 7.002941026 | 6.280161538 | 0.037060066 | ECM_REGULATORS     | 1.117142602 | 1.115089315 |
| MMP3   | 9.10476359  | 4.142292602 | 1.66E-75    | 9.10476359  | 4.870730769 | 1.40E-07    | ECM_REGULATORS     | 2.198001074 | 1.869280817 |
| MMP7   | 9.356091795 | 8.135262776 | 4.46E-05    | 9.356091795 | 6.355438462 | 0.001330112 | ECM_REGULATORS     | 1.150066329 | 1.472139468 |
| MMP8   | 2.66470359  | 1.926423533 | 8.29E-06    | 2.66470359  | 0.760753846 | 0.001406696 | ECM_REGULATORS     | 1.383238703 | 3.502714581 |
| MMP9   | 9.930635385 | 9.293933642 | 0.002397483 | 9.930635385 | 7.024846154 | 2.28E-06    | ECM_REGULATORS     | 1.06850724  | 1.413644536 |
| MUC16  | 6.913934359 | 5.384185087 | 9.85E-07    | 6.913934359 | 3.801884615 | 0.001467491 | ECM_AFFILIATED     | 1.284118998 | 1.818554496 |
| MUCL1  | 3.480963077 | 2.692369792 | 0.001980121 | 3.480963077 | 0.808192308 | 0.001656486 | ECM_AFFILIATED     | 1.292899322 | 4.307097511 |
| NID2   | 10.12509231 | 9.115427105 | 1.32E-12    | 10.12509231 | 8.838846154 | 0.00323724  | ECM_GLYCOPROTEINS  | 1.110764443 | 1.145521953 |
| NID2   | 10.12509231 | 9.115427105 | 1.32E-12    | 10.12509231 | 8.838846154 | 0.00323724  | BASEMENT_MEMBRANES | 1.110764443 | 1.145521953 |
| OGFOD1 | 10.75158615 | 10.45417434 | 2.50E-16    | 10.75158615 | 10.34435385 | 0.009790388 | ECM_REGULATORS     | 1.028449096 | 1.039367593 |
| PI3    | 11.93877795 | 5.438570844 | 1.08E-90    | 11.93877795 | 8.346023077 | 0.000658415 | ECM_REGULATORS     | 2.195205007 | 1.43047507  |
| PLAU   | 11.83188205 | 10.53550347 | 1.49E-16    | 11.83188205 | 9.151892308 | 2.57E-08    | ECM_REGULATORS     | 1.123048565 | 1.292834493 |
| PLOD3  | 12.04825077 | 11.61495715 | 1.03E-08    | 12.04825077 | 11.00083077 | 0.000509551 | ECM_REGULATORS     | 1.037304797 | 1.095212809 |
| PLXDC1 | 9.320161026 | 8.810221397 | 9.69E-07    | 9.320161026 | 8.401207692 | 0.003938519 | ECM_AFFILIATED     | 1.057880456 | 1.10938348  |
| PLXNA1 | 13.12843641 | 11.47403255 | 1.33E-69    | 13.12843641 | 12.34681538 | 0.012731139 | ECM_AFFILIATED     | 1.144186785 | 1.063305476 |



|                 |             |             |             |             |             |             |                   |             |             |
|-----------------|-------------|-------------|-------------|-------------|-------------|-------------|-------------------|-------------|-------------|
| <b>PLXNA3</b>   | 11.76699641 | 10.69586156 | 4.89E-41    | 11.76699641 | 11.09333846 | 0.009156754 | ECM_AFFILIATED    | 1.100144793 | 1.06072635  |
| <b>PODNL1</b>   | 7.979619487 | 6.538444441 | 6.45E-19    | 7.979619487 | 6.157630769 | 0.000119323 | PROTEOGLYCANS     | 1.220415583 | 1.295891194 |
| <b>PXDN</b>     | 11.84663179 | 11.25497626 | 1.10E-05    | 11.84663179 | 10.61263077 | 0.002393483 | ECM_GLYCOPROTEINS | 1.05256835  | 1.116276638 |
| <b>SDC1</b>     | 14.2739241  | 12.36422045 | 6.46E-23    | 14.2739241  | 12.47496154 | 0.000207311 | ECM_AFFILIATED    | 1.154454028 | 1.144205861 |
| <b>SEMA4B</b>   | 13.53802    | 11.79546499 | 1.81E-78    | 13.53802    | 12.76428462 | 0.012051994 | ECM_AFFILIATED    | 1.14773093  | 1.060617215 |
| <b>SERPINB2</b> | 8.234593846 | 3.854974139 | 2.55E-59    | 8.234593846 | 5.588176923 | 0.015719074 | ECM_REGULATORS    | 2.136095743 | 1.473574291 |
| <b>SERPINB3</b> | 9.101648205 | 3.364342102 | 2.51E-66    | 9.101648205 | 6.041546154 | 0.024003919 | ECM_REGULATORS    | 2.705327796 | 1.506509753 |
| <b>SERPINB4</b> | 7.289621538 | 2.728945079 | 4.75E-58    | 7.289621538 | 4.201607692 | 0.01293812  | ECM_REGULATORS    | 2.671223249 | 1.734960061 |
| <b>SERPINB5</b> | 12.49761179 | 5.535738191 | 1.54E-85    | 12.49761179 | 8.564661538 | 7.67E-07    | ECM_REGULATORS    | 2.257623349 | 1.459206734 |
| <b>SERPINB7</b> | 6.581345641 | 3.093882334 | 2.81E-51    | 6.581345641 | 4.2684      | 0.008356575 | ECM_REGULATORS    | 2.127212651 | 1.541876497 |
| <b>SERPINB9</b> | 10.24224923 | 9.199020844 | 2.92E-27    | 10.24224923 | 8.871261538 | 0.000235061 | ECM_REGULATORS    | 1.11340646  | 1.154542585 |
| <b>SERPINE1</b> | 12.31690205 | 10.74768977 | 1.22E-21    | 12.31690205 | 10.78537692 | 0.005734948 | ECM_REGULATORS    | 1.146004612 | 1.142000149 |
| <b>SERPINH1</b> | 13.038      | 12.68452609 | 0.000590143 | 13.038      | 11.48388462 | 2.73E-06    | ECM_REGULATORS    | 1.027866544 | 1.135330111 |
| <b>SPON2</b>    | 10.69802564 | 10.24663644 | 0.007812454 | 10.69802564 | 9.478461538 | 0.000222126 | ECM_GLYCOPROTEINS | 1.044052427 | 1.128666883 |
| <b>ST14</b>     | 13.42460256 | 11.48217639 | 2.02E-25    | 13.42460256 | 12.26475385 | 0.002816678 | ECM_REGULATORS    | 1.169168815 | 1.094567631 |
| <b>SULF1</b>    | 11.96557436 | 10.89942983 | 2.41E-09    | 11.96557436 | 10.37616154 | 0.001472433 | ECM_REGULATORS    | 1.097816542 | 1.153179267 |
| <b>SULF2</b>    | 13.03585846 | 11.71216418 | 1.86E-27    | 13.03585846 | 11.6123     | 0.0001348   | ECM_REGULATORS    | 1.113018761 | 1.122590569 |
| <b>TGFB1</b>    | 12.89621333 | 12.17238885 | 6.24E-07    | 12.89621333 | 11.17114615 | 0.000567278 | ECM_GLYCOPROTEINS | 1.059464456 | 1.154421682 |
| <b>THBS2</b>    | 11.80440821 | 11.11429101 | 3.80E-05    | 11.80440821 | 10.50054615 | 0.013137334 | ECM_GLYCOPROTEINS | 1.062092777 | 1.12417088  |
| <b>TINAG</b>    | 2.590997949 | 1.575004602 | 8.04E-06    | 2.590997949 | 0.832123077 | 0.022305541 | ECM_GLYCOPROTEINS | 1.645073255 | 3.113719617 |
| <b>TNC</b>      | 13.37205436 | 11.82924378 | 1.32E-18    | 13.37205436 | 11.92383846 | 0.030670438 | ECM_GLYCOPROTEINS | 1.130423432 | 1.121455511 |
| <b>TNFAIP6</b>  | 7.574409744 | 6.456752307 | 1.84E-09    | 7.574409744 | 6.102261538 | 0.003454241 | ECM_GLYCOPROTEINS | 1.173099011 | 1.241246331 |
| <b>VCAN</b>     | 12.25474154 | 11.6322721  | 0.000343256 | 12.25474154 | 11.09766923 | 0.019360246 | PROTEOGLYCANS     | 1.053512283 | 1.104262641 |
| <b>WISP1</b>    | 8.068133846 | 7.255730357 | 1.45E-06    | 8.068133846 | 5.837430769 | 1.85E-05    | ECM_GLYCOPROTEINS | 1.111967155 | 1.382137821 |
| <b>WNT10A</b>   | 8.032941538 | 5.868206431 | 1.04E-26    | 8.032941538 | 5.917769231 | 0.001659691 | SECRETED_FACTORS  | 1.368892119 | 1.357427305 |
| <b>WNT11</b>    | 6.676541538 | 5.899689413 | 6.30E-06    | 6.676541538 | 5.137553846 | 0.025053523 | SECRETED_FACTORS  | 1.131676783 | 1.299556508 |
| <b>WNT2</b>     | 6.58204     | 5.44718666  | 1.93E-07    | 6.58204     | 3.668392308 | 5.48E-07    | SECRETED_FACTORS  | 1.208337516 | 1.794257388 |
| <b>WNT3A</b>    | 4.873461538 | 2.892981229 | 2.60E-24    | 4.873461538 | 2.627853846 | 0.012568961 | SECRETED_FACTORS  | 1.684581113 | 1.854540558 |
| <b>WNT5A</b>    | 11.21177846 | 8.979624458 | 5.32E-40    | 11.21177846 | 9.713746154 | 0.001288968 | SECRETED_FACTORS  | 1.248579884 | 1.154217774 |
| <b>WNT7B</b>    | 9.563474872 | 7.379284375 | 1.23E-16    | 9.563474872 | 5.403084615 | 1.32E-05    | SECRETED_FACTORS  | 1.295989473 | 1.770002795 |
| <b>VWA9</b>     | 10.82967846 | 10.61265181 | 5.09E-11    | 10.82967846 | 10.46946923 | 0.015702004 | ECM_GLYCOPROTEINS | 1.020449804 | 1.034405682 |
| <b>XCL1</b>     | 5.096330256 | 4.158361692 | 1.22E-10    | 5.096330256 | 3.825692308 | 0.01848279  | SECRETED_FACTORS  | 1.225562044 | 1.332132813 |
| <b>ZPLD1</b>    | 2.808174359 | 2.32646436  | 0.00187849  | 2.808174359 | 1.324253846 | 0.005266199 | ECM_GLYCOPROTEINS | 1.207056685 | 2.120571042 |

**Glioblastoma Multiforme (GBM)**

| Signature genes | Expression in tumor | Expression in rest of Pan-Cancer | P-value     | Expression in tumor | Expression in normal tissue | P-value     | Matrisome category | Fold change vs. Pan-Cancer | Fold change vs. normal |
|-----------------|---------------------|----------------------------------|-------------|---------------------|-----------------------------|-------------|--------------------|----------------------------|------------------------|
| A2M             | 14.92080409         | 14.08456856                      | 3.08E-09    | 14.92080409         | 13.3281                     | 0.000210522 | ECM_REGULATORS     | 1.059372464                | 1.119499711            |
| ADAM12          | 9.689019298         | 8.54835507                       | 7.31E-09    | 9.689019298         | 7.1656                      | 0.000100881 | ECM_REGULATORS     | 1.133436693                | 1.352157432            |
| ADAM17          | 10.76146491         | 10.17811342                      | 4.41E-11    | 10.76146491         | 9.79774                     | 2.56E-05    | ECM_REGULATORS     | 1.057314305                | 1.09836196             |
| ADAM9           | 12.52838187         | 11.81519477                      | 1.81E-12    | 12.52838187         | 10.89746                    | 1.90E-05    | ECM_REGULATORS     | 1.060361857                | 1.149660735            |
| ADAMTS15        | 8.277893567         | 7.764800786                      | 0.005238777 | 8.277893567         | 6.15078                     | 0.001365331 | ECM_REGULATORS     | 1.066079323                | 1.345828264            |
| ADAMTS6         | 7.47978538          | 5.613373369                      | 1.89E-45    | 7.47978538          | 5.10728                     | 1.52E-06    | ECM_REGULATORS     | 1.33249383                 | 1.464534034            |
| ADAMTS9         | 10.04706784         | 8.96845603                       | 2.24E-14    | 10.04706784         | 8.12938                     | 0.00019715  | ECM_REGULATORS     | 1.120267279                | 1.235895952            |
| AEBP1           | 13.40413743         | 12.89517578                      | 0.00057708  | 13.40413743         | 11.05854                    | 0.000426762 | ECM_GLYCOPROTEINS  | 1.039469152                | 1.212107333            |
| ANGPT2          | 10.3335848          | 8.578557541                      | 1.76E-47    | 10.3335848          | 6.56438                     | 2.19E-10    | SECRETED_FACTORS   | 1.204583025                | 1.574190525            |
| ANGPTL2         | 11.48728538         | 10.30002002                      | 3.45E-19    | 11.48728538         | 9.82668                     | 0.000125598 | SECRETED_FACTORS   | 1.115268257                | 1.168989463            |
| ANXA5           | 14.29945439         | 13.38816387                      | 3.62E-30    | 14.29945439         | 11.6682                     | 1.81E-10    | ECM_AFFILIATED     | 1.068066878                | 1.225506452            |
| C1QA            | 12.78696901         | 11.44298469                      | 7.51E-23    | 12.78696901         | 10.60316                    | 0.000139674 | ECM_AFFILIATED     | 1.117450503                | 1.205958319            |
| C1QB            | 13.47323216         | 11.57063529                      | 4.30E-40    | 13.47323216         | 11.26478                    | 0.000105875 | ECM_AFFILIATED     | 1.164433225                | 1.196049294            |
| C1QC            | 13.22345439         | 11.40477196                      | 1.57E-39    | 13.22345439         | 11.12644                    | 0.00012245  | ECM_AFFILIATED     | 1.159466795                | 1.18847128             |
| C1QL1           | 11.10762456         | 5.470629542                      | 1.55E-162   | 11.10762456         | 9.54586                     | 0.04693223  | ECM_AFFILIATED     | 2.030410664                | 1.163606481            |
| C1QTNF1         | 10.78645556         | 9.803191698                      | 1.14E-13    | 10.78645556         | 8.39614                     | 9.91E-05    | ECM_AFFILIATED     | 1.10030038                 | 1.284692199            |
| C1QTNF5         | 10.39453275         | 9.224824415                      | 3.19E-21    | 10.39453275         | 8.31122                     | 4.26E-06    | ECM_AFFILIATED     | 1.126800065                | 1.250662688            |
| CCL25           | 2.8051              | 2.245968906                      | 0.006003885 | 2.8051              | 1.1001                      | 0.007298855 | SECRETED_FACTORS   | 1.248948724                | 2.549859104            |
| CELA1           | 1.973848538         | 0.601802042                      | 9.74E-74    | 1.973848538         | 0.3527                      | 0.011197702 | ECM_REGULATORS     | 3.279896709                | 5.596395061            |
| CLEC18B         | 8.844843275         | 4.291425886                      | 4.03E-107   | 8.844843275         | 6.60962                     | 0.000650599 | ECM_AFFILIATED     | 2.061049989                | 1.338177274            |
| CLEC18C         | 5.896684795         | 3.336971755                      | 6.26E-35    | 5.896684795         | 3.45574                     | 0.0005729   | ECM_AFFILIATED     | 1.767076627                | 1.706345036            |
| CLEC1A          | 6.488012281         | 6.256580537                      | 0.043885321 | 6.488012281         | 5.20304                     | 0.001325695 | ECM_AFFILIATED     | 1.036990133                | 1.246965674            |
| CLEC4A          | 6.691049123         | 6.154100306                      | 5.67E-08    | 6.691049123         | 5.20506                     | 0.001450987 | ECM_AFFILIATED     | 1.087250579                | 1.285489336            |
| CLEC4E          | 5.952890058         | 5.397074257                      | 0.000208283 | 5.952890058         | 2.30614                     | 6.31E-06    | ECM_AFFILIATED     | 1.10298465                 | 2.581322061            |
| CLEC5A          | 8.526384211         | 6.282516645                      | 6.57E-43    | 8.526384211         | 5.01384                     | 1.02E-05    | ECM_AFFILIATED     | 1.357160624                | 1.700569665            |
| COL22A1         | 8.85425731          | 6.480732707                      | 9.98E-29    | 8.85425731          | 6.35596                     | 0.002023541 | COLLAGENS          | 1.366243249                | 1.393063724            |
| COL28A1         | 8.27685731          | 5.407354682                      | 1.81E-58    | 8.27685731          | 6.06172                     | 0.016007492 | COLLAGENS          | 1.530666619                | 1.36543049             |
| COL4A6          | 6.94462807          | 6.147784938                      | 0.000812358 | 6.94462807          | 4.95066                     | 0.013248676 | BASEMENT_MEMBRANES | 1.129614673                | 1.40276813             |
| COL4A6          | 6.94462807          | 6.147784938                      | 0.000812358 | 6.94462807          | 4.95066                     | 0.013248676 | COLLAGENS          | 1.129614673                | 1.40276813             |
| CRISPLD1        | 11.75843275         | 7.920171806                      | 1.97E-108   | 11.75843275         | 8.618                       | 1.43E-08    | ECM_GLYCOPROTEINS  | 1.484618394                | 1.364403893            |
| CSF1            | 11.4924             | 10.52971149                      | 9.14E-23    | 11.4924             | 10.41772                    | 0.01020349  | SECRETED_FACTORS   | 1.091425915                | 1.103158849            |
| CSPG4           | 12.00906433         | 10.12697844                      | 3.26E-34    | 12.00906433         | 10.75842                    | 0.011178378 | ECM_AFFILIATED     | 1.18584871                 | 1.116247955            |
| CTSL            | 12.24415673         | 11.89488844                      | 0.000350999 | 12.24415673         | 11.04692                    | 0.001114008 | ECM_REGULATORS     | 1.029362889                | 1.108377423            |
| CTSO            | 10.88078129         | 10.41942741                      | 7.66E-08    | 10.88078129         | 9.74212                     | 0.000409833 | ECM_REGULATORS     | 1.044278237                | 1.116880236            |
| DMP1            | 2.393780702         | 1.437188155                      | 3.40E-15    | 2.393780702         | 1.19868                     | 0.026714204 | ECM_GLYCOPROTEINS  | 1.665600077                | 1.997013967            |
| ECM2            | 9.647707018         | 8.074004319                      | 7.23E-31    | 9.647707018         | 7.4039                      | 2.99E-05    | ECM_GLYCOPROTEINS  | 1.194909816                | 1.303057445            |
| EFEMP1          | 12.94942398         | 10.3545701                       | 5.10E-45    | 12.94942398         | 10.28012                    | 9.68E-05    | ECM_GLYCOPROTEINS  | 1.250599866                | 1.259656889            |
| EFEMP2          | 11.61823977         | 10.48730135                      | 2.81E-23    | 11.61823977         | 9.78854                     | 8.52E-05    | ECM_GLYCOPROTEINS  | 1.107838841                | 1.186922643            |
| ELN             | 12.09867135         | 9.960839426                      | 1.91E-33    | 12.09867135         | 9.6098                      | 4.18E-06    | ECM_GLYCOPROTEINS  | 1.214623671                | 1.258993043            |
| EMILIN1         | 11.02497251         | 10.71583015                      | 0.03241808  | 11.02497251         | 9.33006                     | 0.001857221 | ECM_GLYCOPROTEINS  | 1.028849128                | 1.181661481            |
| EMILIN3         | 9.496962573         | 4.774837108                      | 2.76E-135   | 9.496962573         | 7.66324                     | 0.047526473 | ECM_GLYCOPROTEINS  | 1.988960536                | 1.239288157            |

|          |             |             |             |             |          |             |                    |             |             |
|----------|-------------|-------------|-------------|-------------|----------|-------------|--------------------|-------------|-------------|
| EPO      | 2.917418129 | 2.129279741 | 8.99E-07    | 2.917418129 | 1.25194  | 0.00992709  | SECRETED_FACTORS   | 1.370143186 | 2.33031785  |
| F13A1    | 10.21198889 | 9.303279016 | 1.82E-08    | 10.21198889 | 7.60208  | 0.023026719 | ECM_REGULATORS     | 1.0976763   | 1.343315104 |
| FAM20C   | 12.3022807  | 10.64280416 | 6.96E-56    | 12.3022807  | 10.94456 | 0.008545014 | ECM_REGULATORS     | 1.155924747 | 1.124054389 |
| FGF11    | 10.07708421 | 7.485597978 | 9.50E-56    | 10.07708421 | 8.68298  | 0.001727878 | SECRETED_FACTORS   | 1.346196288 | 1.160555962 |
| FREM2    | 9.408122807 | 6.572103656 | 5.81E-26    | 9.408122807 | 7.61154  | 0.009432587 | ECM_AFFILIATED     | 1.431523801 | 1.236034075 |
| GPC2     | 8.460523977 | 5.339490218 | 3.68E-94    | 8.460523977 | 6.59618  | 0.009484983 | ECM_AFFILIATED     | 1.584519052 | 1.282639949 |
| HPSE     | 8.182471345 | 7.779119534 | 0.000808658 | 8.182471345 | 6.72414  | 0.005431225 | ECM_REGULATORS     | 1.051850574 | 1.216879979 |
| HYAL2    | 11.41889766 | 11.18846337 | 0.000155815 | 11.41889766 | 9.34486  | 3.84E-12    | ECM_REGULATORS     | 1.020595705 | 1.22194422  |
| IBSP     | 7.619619298 | 3.261130655 | 5.10E-104   | 7.619619298 | 3.27828  | 0.000281774 | ECM_GLYCOPROTEINS  | 2.336496174 | 2.32427349  |
| IGFBP1   | 5.678107018 | 2.828676024 | 2.24E-27    | 5.678107018 | 3.26974  | 0.000565389 | ECM_GLYCOPROTEINS  | 2.007337344 | 1.73656224  |
| IGFBP2   | 13.51584327 | 11.64802408 | 6.91E-26    | 13.51584327 | 8.24424  | 1.07E-11    | ECM_GLYCOPROTEINS  | 1.160355025 | 1.639428653 |
| IGFBP5   | 14.81711287 | 13.33117424 | 1.14E-16    | 14.81711287 | 13.27962 | 0.006107684 | ECM_GLYCOPROTEINS  | 1.111463447 | 1.115778378 |
| IGFBP7   | 14.40253801 | 13.40811877 | 1.93E-23    | 14.40253801 | 11.66528 | 8.51E-08    | ECM_GLYCOPROTEINS  | 1.074165456 | 1.234650005 |
| LAMA2    | 10.24906608 | 8.543781701 | 1.17E-25    | 10.24906608 | 9.1419   | 0.024603957 | ECM_GLYCOPROTEINS  | 1.199593627 | 1.121108969 |
| LAMA2    | 10.24906608 | 8.543781701 | 1.17E-25    | 10.24906608 | 9.1419   | 0.024603957 | BASEMENT_MEMBRANES | 1.199593627 | 1.121108969 |
| LAMA4    | 11.26409357 | 10.94833087 | 0.019152065 | 11.26409357 | 9.20852  | 1.66E-05    | ECM_GLYCOPROTEINS  | 1.028841172 | 1.223225184 |
| LAMA4    | 11.26409357 | 10.94833087 | 0.019152065 | 11.26409357 | 9.20852  | 1.66E-05    | BASEMENT_MEMBRANES | 1.028841172 | 1.223225184 |
| LAMB4    | 4.150412281 | 3.022570295 | 5.27E-16    | 4.150412281 | 1.17232  | 4.33E-08    | ECM_GLYCOPROTEINS  | 1.373140035 | 3.540340761 |
| LAMB4    | 4.150412281 | 3.022570295 | 5.27E-16    | 4.150412281 | 1.17232  | 4.33E-08    | BASEMENT_MEMBRANES | 1.373140035 | 3.540340761 |
| LAMC3    | 9.413076608 | 7.734006658 | 3.29E-25    | 9.413076608 | 8.37412  | 0.023318582 | ECM_GLYCOPROTEINS  | 1.217102212 | 1.124067557 |
| LAMC3    | 9.413076608 | 7.734006658 | 3.29E-25    | 9.413076608 | 8.37412  | 0.023318582 | BASEMENT_MEMBRANES | 1.217102212 | 1.124067557 |
| LGALS1   | 13.43515614 | 12.75693088 | 2.57E-10    | 13.43515614 | 11.47842 | 4.48E-05    | ECM_AFFILIATED     | 1.053165238 | 1.170470861 |
| LOX      | 10.00684795 | 9.666983029 | 0.030015082 | 10.00684795 | 6.5775   | 2.55E-05    | ECM_REGULATORS     | 1.03515729  | 1.521375592 |
| LOXL3    | 10.0967117  | 7.745675268 | 1.19E-97    | 10.0967117  | 7.88156  | 1.58E-11    | ECM_REGULATORS     | 1.303528917 | 1.281054981 |
| MASP1    | 10.83901813 | 6.007358593 | 3.27E-79    | 10.83901813 | 8.93504  | 0.007579586 | ECM_REGULATORS     | 1.804290182 | 1.21309117  |
| MATN2    | 11.78138187 | 10.21987741 | 1.22E-28    | 11.78138187 | 10.16568 | 0.000357027 | ECM_GLYCOPROTEINS  | 1.152790919 | 1.15893692  |
| MATN3    | 7.555430409 | 6.422352037 | 8.13E-11    | 7.555430409 | 6.55734  | 0.04471118  | ECM_GLYCOPROTEINS  | 1.176427322 | 1.152209647 |
| MFAP3    | 8.959746784 | 8.775480752 | 0.035689467 | 8.959746784 | 8.42072  | 0.045404131 | ECM_GLYCOPROTEINS  | 1.020997828 | 1.064011959 |
| MMP25    | 7.214401754 | 6.312897651 | 9.34E-15    | 7.214401754 | 4.7201   | 4.13E-05    | ECM_REGULATORS     | 1.142803535 | 1.528442566 |
| MMRN1    | 7.664406433 | 6.709784938 | 8.02E-08    | 7.664406433 | 5.85858  | 0.000337644 | ECM_GLYCOPROTEINS  | 1.142273039 | 1.308236199 |
| NGLY1    | 10.09700409 | 9.985555438 | 0.014202023 | 10.09700409 | 9.4496   | 4.04E-05    | ECM_REGULATORS     | 1.011160987 | 1.06851127  |
| NID1     | 11.75846433 | 11.42389893 | 0.005053943 | 11.75846433 | 8.65532  | 2.36E-09    | BASEMENT_MEMBRANES | 1.029286446 | 1.358524506 |
| NID1     | 11.75846433 | 11.42389893 | 0.005053943 | 11.75846433 | 8.65532  | 2.36E-09    | ECM_GLYCOPROTEINS  | 1.029286446 | 1.358524506 |
| NTN1     | 11.32829766 | 8.219197304 | 2.15E-69    | 11.32829766 | 9.07214  | 6.07E-06    | ECM_GLYCOPROTEINS  | 1.378272992 | 1.24869079  |
| NTN1     | 11.32829766 | 8.219197304 | 2.15E-69    | 11.32829766 | 9.07214  | 6.07E-06    | BASEMENT_MEMBRANES | 1.378272992 | 1.24869079  |
| PLAT     | 11.39158947 | 10.87718591 | 0.001089954 | 11.39158947 | 9.59414  | 0.000458037 | ECM_REGULATORS     | 1.047291971 | 1.187348681 |
| PLOD2    | 11.57145146 | 11.20386516 | 0.008848531 | 11.57145146 | 9.72598  | 4.70E-05    | ECM_REGULATORS     | 1.032808883 | 1.189746582 |
| PLXNA3   | 11.11822047 | 10.71939606 | 3.41E-06    | 11.11822047 | 10.17876 | 0.007993257 | ECM_AFFILIATED     | 1.037205866 | 1.092296161 |
| PXDNL    | 6.287045614 | 4.518930379 | 8.02E-29    | 6.287045614 | 4.24882  | 0.004668019 | ECM_GLYCOPROTEINS  | 1.391268527 | 1.479715689 |
| SERPINA3 | 14.45566374 | 9.066903829 | 3.10E-58    | 14.45566374 | 10.92132 | 7.31E-06    | ECM_REGULATORS     | 1.594332974 | 1.323618733 |
| SERPINA5 | 7.74141462  | 6.563903441 | 8.94E-05    | 7.74141462  | 4.65622  | 9.07E-05    | ECM_REGULATORS     | 1.17939191  | 1.662596402 |
| SERPINB6 | 12.22094795 | 11.89663158 | 4.42E-06    | 12.22094795 | 10.95826 | 4.51E-06    | ECM_REGULATORS     | 1.027261193 | 1.115227048 |
| SERPINB8 | 9.339094152 | 8.817767763 | 2.41E-08    | 9.339094152 | 8.17354  | 0.000325245 | ECM_REGULATORS     | 1.059122264 | 1.142600899 |
| SERPINE1 | 11.93378596 | 10.86046701 | 1.82E-10    | 11.93378596 | 8.37998  | 3.27E-05    | ECM_REGULATORS     | 1.098828067 | 1.42408287  |
| SPARC    | 16.74061637 | 15.03396626 | 8.73E-45    | 16.74061637 | 13.82872 | 1.18E-12    | ECM_GLYCOPROTEINS  | 1.113519618 | 1.210568756 |
| SPP1     | 16.22759181 | 11.86787706 | 1.85E-72    | 16.22759181 | 13.77804 | 0.001201029 | ECM_GLYCOPROTEINS  | 1.367354223 | 1.177786667 |

|                |             |             |             |             |          |             |                   |             |             |
|----------------|-------------|-------------|-------------|-------------|----------|-------------|-------------------|-------------|-------------|
| <b>SRGN</b>    | 11.83501754 | 10.95284832 | 2.97E-14    | 11.83501754 | 9.99404  | 0.000992635 | PROTEOGLYCANS     | 1.080542449 | 1.184207542 |
| <b>SRPX</b>    | 11.16343392 | 8.003414041 | 1.91E-74    | 11.16343392 | 8.07598  | 1.18E-05    | ECM_GLYCOPROTEINS | 1.394833987 | 1.382300838 |
| <b>SRPX2</b>   | 9.372615205 | 7.769879659 | 3.15E-20    | 9.372615205 | 4.73826  | 1.76E-08    | ECM_GLYCOPROTEINS | 1.206275466 | 1.978071107 |
| <b>TGM5</b>    | 4.991847953 | 2.902514786 | 2.84E-24    | 4.991847953 | 1.55432  | 0.00024444  | ECM_REGULATORS    | 1.719835495 | 3.211596038 |
| <b>TIMP4</b>   | 11.04222105 | 4.989430644 | 1.98E-260   | 11.04222105 | 7.32874  | 3.44E-07    | ECM_REGULATORS    | 2.213122466 | 1.506701159 |
| <b>TNC</b>     | 14.00795497 | 11.78978764 | 7.62E-33    | 14.00795497 | 10.10318 | 7.00E-10    | ECM_GLYCOPROTEINS | 1.188143111 | 1.386489696 |
| <b>TNFAIP6</b> | 8.519797661 | 6.560521832 | 6.10E-24    | 8.519797661 | 6.29632  | 0.001107522 | ECM_GLYCOPROTEINS | 1.298646339 | 1.35313924  |
| <b>VCAN</b>    | 12.93575263 | 11.54805434 | 1.86E-14    | 12.93575263 | 11.1978  | 1.04E-05    | PROTEOGLYCANS     | 1.120167281 | 1.155204829 |
| <b>WISP1</b>   | 7.917148538 | 7.472480874 | 0.009447198 | 7.917148538 | 5.7609   | 0.019244273 | ECM_GLYCOPROTEINS | 1.059507367 | 1.374290222 |
| <b>WNT5A</b>   | 9.941411111 | 9.054258664 | 7.64E-07    | 9.941411111 | 8.03454  | 2.70E-05    | SECRETED_FACTORS  | 1.097981787 | 1.237334198 |
| <b>VWF</b>     | 12.51642164 | 12.22619669 | 0.015786384 | 12.51642164 | 11.3773  | 0.00838525  | ECM_GLYCOPROTEINS | 1.023737958 | 1.100122317 |

**Head And Neck Squamous Cell Carcinoma (HNSC)**

| Signature genes | Expression in tumor | Expression in rest of Pan-Cancer | P-value     | Expression in tumor | Expression in normal tissue | P-value     | Matrisome category | Fold change vs. Pan-Cancer | Fold change vs. normal |
|-----------------|---------------------|----------------------------------|-------------|---------------------|-----------------------------|-------------|--------------------|----------------------------|------------------------|
| ADAM12          | 9.948067376         | 8.350742022                      | 1.05E-45    | 9.948067376         | 6.419404545                 | 2.34E-28    | ECM_REGULATORS     | 1.191279452                | 1.549686938            |
| ADAM17          | 10.95340993         | 10.14128815                      | 5.93E-62    | 10.95340993         | 10.377175                   | 0.000453842 | ECM_REGULATORS     | 1.080080732                | 1.055529075            |
| ADAM19          | 9.921342199         | 8.982960699                      | 1.25E-40    | 9.921342199         | 8.620761364                 | 8.28E-09    | ECM_REGULATORS     | 1.104462385                | 1.150866122            |
| ADAM23          | 8.840080319         | 6.703816141                      | 5.92E-74    | 8.840080319         | 7.994961364                 | 0.012746523 | ECM_REGULATORS     | 1.318663897                | 1.105706446            |
| ADAM8           | 10.0261734          | 8.674758783                      | 7.23E-74    | 10.0261734          | 8.335984091                 | 1.59E-16    | ECM_REGULATORS     | 1.155786997                | 1.202758222            |
| ADAM9           | 12.10201826         | 11.80565268                      | 1.84E-07    | 12.10201826         | 11.72331364                 | 0.004994061 | ECM_REGULATORS     | 1.025103702                | 1.032303548            |
| ADAMDEC1        | 6.715496277         | 6.075688093                      | 1.18E-07    | 6.715496277         | 4.908579545                 | 3.64E-07    | ECM_REGULATORS     | 1.105306292                | 1.368113976            |
| ADAMTS12        | 8.898492199         | 8.012440085                      | 4.44E-18    | 8.898492199         | 5.717672727                 | 7.89E-24    | ECM_REGULATORS     | 1.110584554                | 1.556313665            |
| ADAMTS14        | 7.776204965         | 6.612327525                      | 9.53E-37    | 7.776204965         | 5.892034091                 | 1.66E-16    | ECM_REGULATORS     | 1.176016302                | 1.319782752            |
| ADAMTS15        | 8.207466489         | 7.84373793                       | 0.000346353 | 8.207466489         | 7.277186364                 | 0.003149876 | ECM_REGULATORS     | 1.04637184                 | 1.127835138            |
| ADAMTS2         | 10.75396879         | 9.443182303                      | 2.43E-48    | 10.75396879         | 7.706502273                 | 9.48E-25    | ECM_REGULATORS     | 1.138807708                | 1.395440942            |
| ADAMTS20        | 3.076375            | 1.652162821                      | 1.78E-46    | 3.076375            | 0.291618182                 | 1.48E-12    | ECM_REGULATORS     | 1.862028948                | 10.54932508            |
| ADAMTS4         | 9.474466135         | 9.181597333                      | 0.000378262 | 9.474466135         | 8.540547727                 | 3.66E-05    | ECM_REGULATORS     | 1.031897369                | 1.109351114            |
| AGRN            | 13.96252376         | 13.21509687                      | 1.69E-39    | 13.96252376         | 12.43534091                 | 1.06E-22    | ECM_GLYCOPROTEINS  | 1.056558563                | 1.12280989             |
| AGRN            | 13.96252376         | 13.21509687                      | 1.69E-39    | 13.96252376         | 12.43534091                 | 1.06E-22    | BASEMENT_MEMBRANES | 1.056558563                | 1.12280989             |
| ANXA10          | 2.54477234          | 2.193632586                      | 0.015295502 | 2.54477234          | 1.33505                     | 0.000767955 | ECM_AFFILIATED     | 1.160072273                | 1.906125119            |
| ANXA8           | 13.16645603         | 4.785109393                      | 0           | 13.16645603         | 12.71096364                 | 0.028187346 | ECM_AFFILIATED     | 2.751547551                | 1.035834607            |
| ANXA8L1         | 12.07652571         | 4.967643938                      | 0           | 12.07652571         | 11.53127273                 | 0.016651098 | ECM_AFFILIATED     | 2.431036898                | 1.047284718            |
| ARTN            | 7.862509752         | 5.254881498                      | 1.00E-176   | 7.862509752         | 4.71635                     | 3.59E-26    | SECRETED_FACTORS   | 1.496229697                | 1.667075122            |
| ASPN            | 9.140427837         | 8.403881748                      | 1.73E-11    | 9.140427837         | 7.020922727                 | 3.34E-11    | PROTEOGLYCANS      | 1.087643557                | 1.301884124            |
| BGN             | 13.43368511         | 13.2532102                       | 0.038932474 | 13.43368511         | 11.83328182                 | 4.62E-11    | PROTEOGLYCANS      | 1.013617449                | 1.135245937            |
| BMP1            | 11.46753635         | 10.57772517                      | 4.05E-78    | 11.46753635         | 9.818897727                 | 3.24E-28    | ECM_REGULATORS     | 1.084121223                | 1.167904653            |
| BMP2            | 9.608940426         | 7.888544515                      | 2.91E-61    | 9.608940426         | 8.775618182                 | 0.000180573 | SECRETED_FACTORS   | 1.218087875                | 1.094958808            |
| C1QTNF1         | 10.26840638         | 9.864086471                      | 3.74E-08    | 10.26840638         | 9.524468182                 | 0.000113333 | ECM_AFFILIATED     | 1.040989088                | 1.078108109            |
| C1QTNF6         | 10.02811401         | 9.306514889                      | 5.48E-34    | 10.02811401         | 7.322515909                 | 1.07E-28    | ECM_AFFILIATED     | 1.077536986                | 1.369490231            |
| CCL11           | 5.397409574         | 3.82493177                       | 1.55E-37    | 5.397409574         | 2.269229545                 | 1.57E-19    | SECRETED_FACTORS   | 1.411112642                | 2.378520756            |
| CCL18           | 9.035768972         | 6.932424042                      | 4.52E-47    | 9.035768972         | 7.828165909                 | 0.000196076 | SECRETED_FACTORS   | 1.303406848                | 1.154263857            |
| CCL20           | 8.126826596         | 5.783442632                      | 1.80E-56    | 8.126826596         | 6.537947727                 | 1.44E-05    | SECRETED_FACTORS   | 1.405188417                | 1.243024101            |
| CCL26           | 4.805993794         | 3.033188246                      | 2.19E-97    | 4.805993794         | 3.874595455                 | 0.002014565 | SECRETED_FACTORS   | 1.584469346                | 1.240385958            |
| CCL3            | 7.679767199         | 7.449845244                      | 0.001895206 | 7.679767199         | 6.691304545                 | 1.37E-05    | SECRETED_FACTORS   | 1.030862648                | 1.147723459            |
| CCL4            | 7.884945035         | 7.697607401                      | 0.010304435 | 7.884945035         | 7.254159091                 | 0.004721971 | SECRETED_FACTORS   | 1.024337125                | 1.086955075            |
| CCL5            | 10.41276259         | 9.278506976                      | 2.45E-38    | 10.41276259         | 9.162879545                 | 2.40E-06    | SECRETED_FACTORS   | 1.122245488                | 1.136407233            |
| CCL7            | 3.09194078          | 2.225775566                      | 4.88E-22    | 3.09194078          | 1.5775                      | 5.00E-08    | SECRETED_FACTORS   | 1.38915209                 | 1.960025851            |
| CD109           | 12.0543422          | 9.638371256                      | 1.22E-182   | 12.0543422          | 10.98536591                 | 2.34E-11    | ECM_REGULATORS     | 1.250661743                | 1.09730912             |
| CLCF1           | 7.861660106         | 7.690002013                      | 0.027969312 | 7.861660106         | 7.222940909                 | 0.001436758 | SECRETED_FACTORS   | 1.022322243                | 1.088429243            |
| CLEC12A         | 5.475124823         | 5.085718143                      | 2.83E-05    | 5.475124823         | 3.7949                      | 8.28E-10    | ECM_AFFILIATED     | 1.076568671                | 1.442758656            |
| CLEC12B         | 2.127197695         | 1.684964628                      | 8.52E-10    | 2.127197695         | 0.923445455                 | 2.03E-06    | ECM_AFFILIATED     | 1.262458369                | 2.303544497            |
| CLEC2B          | 9.558077128         | 8.063107423                      | 9.99E-115   | 9.558077128         | 9.0737                      | 0.017736648 | ECM_AFFILIATED     | 1.185408631                | 1.053382537            |
| CLEC4D          | 2.632829965         | 2.265460601                      | 4.06E-06    | 2.632829965         | 1.790034091                 | 0.0001252   | ECM_AFFILIATED     | 1.162161003                | 1.470826717            |
| CLEC6A          | 1.689381915         | 1.437028124                      | 0.000207915 | 1.689381915         | 0.695747727                 | 7.37E-06    | ECM_AFFILIATED     | 1.175608109                | 2.428152977            |
| CLEC7A          | 9.047491844         | 7.68305222                       | 9.55E-74    | 9.047491844         | 7.725547727                 | 1.04E-08    | ECM_AFFILIATED     | 1.17759083                 | 1.17111332             |
| COL10A1         | 8.292123582         | 6.767186112                      | 3.39E-21    | 8.292123582         | 3.586397727                 | 1.49E-26    | COLLAGENS          | 1.225342919                | 2.312103735            |



|          |             |             |             |             |             |             |                    |             |             |
|----------|-------------|-------------|-------------|-------------|-------------|-------------|--------------------|-------------|-------------|
| COL11A1  | 8.577338475 | 7.421047464 | 3.83E-12    | 8.577338475 | 4.628520455 | 7.38E-16    | COLLAGENS          | 1.155812372 | 1.853149091 |
| COL12A1  | 12.89354734 | 11.16124339 | 2.86E-53    | 12.89354734 | 10.255075   | 1.51E-21    | COLLAGENS          | 1.155207076 | 1.257284548 |
| COL13A1  | 7.113368972 | 6.322005039 | 1.00E-21    | 7.113368972 | 4.840290909 | 6.40E-29    | COLLAGENS          | 1.1251761   | 1.469616001 |
| COL16A1  | 11.77041348 | 10.36012609 | 4.36E-61    | 11.77041348 | 10.17894091 | 1.64E-14    | COLLAGENS          | 1.136126469 | 1.156349524 |
| COL17A1  | 14.78535408 | 7.260558424 | 0           | 14.78535408 | 13.81915    | 0.001286475 | COLLAGENS          | 2.036393513 | 1.069917765 |
| COL1A1   | 16.26503759 | 14.59467244 | 2.55E-35    | 16.26503759 | 12.85541818 | 1.62E-23    | COLLAGENS          | 1.114450335 | 1.265228199 |
| COL1A2   | 15.49162748 | 14.42088372 | 3.59E-20    | 15.49162748 | 12.93503864 | 3.90E-16    | COLLAGENS          | 1.074249525 | 1.197648335 |
| COL22A1  | 7.618780851 | 6.534245331 | 1.35E-19    | 7.618780851 | 4.991179545 | 3.54E-10    | COLLAGENS          | 1.165977166 | 1.526448965 |
| COL24A1  | 5.590579787 | 5.304828298 | 0.001318744 | 5.590579787 | 4.103320455 | 1.28E-08    | COLLAGENS          | 1.053866303 | 1.36245264  |
| COL27A1  | 10.6764695  | 9.516521506 | 2.20E-50    | 10.6764695  | 8.75675     | 4.88E-23    | COLLAGENS          | 1.121887813 | 1.219227396 |
| COL2A1   | 4.706288121 | 4.212122029 | 0.000961517 | 4.706288121 | 2.003331818 | 9.09E-15    | COLLAGENS          | 1.117319985 | 2.349230456 |
| COL3A1   | 15.58749362 | 14.16122497 | 2.36E-28    | 15.58749362 | 12.74591364 | 8.53E-18    | COLLAGENS          | 1.100716474 | 1.22294047  |
| COL4A1   | 13.46562908 | 13.20038037 | 0.001550095 | 13.46562908 | 10.77245455 | 3.34E-31    | COLLAGENS          | 1.02009402  | 1.250005653 |
| COL4A1   | 13.46562908 | 13.20038037 | 0.001550095 | 13.46562908 | 10.77245455 | 3.34E-31    | BASEMENT_MEMBRANES | 1.02009402  | 1.250005653 |
| COL4A2   | 13.7168477  | 13.46444425 | 0.001752434 | 13.7168477  | 11.2737     | 3.45E-29    | COLLAGENS          | 1.018745923 | 1.216712144 |
| COL4A2   | 13.7168477  | 13.46444425 | 0.001752434 | 13.7168477  | 11.2737     | 3.45E-29    | BASEMENT_MEMBRANES | 1.018745923 | 1.216712144 |
| COL4A5   | 11.00873528 | 9.093607706 | 1.20E-78    | 11.00873528 | 9.027431818 | 1.80E-19    | BASEMENT_MEMBRANES | 1.210601517 | 1.219475871 |
| COL4A5   | 11.00873528 | 9.093607706 | 1.20E-78    | 11.00873528 | 9.027431818 | 1.80E-19    | COLLAGENS          | 1.210601517 | 1.219475871 |
| COL4A6   | 9.309090603 | 5.843072094 | 7.72E-163   | 9.309090603 | 7.164411364 | 1.34E-08    | COLLAGENS          | 1.593184279 | 1.299351772 |
| COL4A6   | 9.309090603 | 5.843072094 | 7.72E-163   | 9.309090603 | 7.164411364 | 1.34E-08    | BASEMENT_MEMBRANES | 1.593184279 | 1.299351772 |
| COL5A1   | 13.24905248 | 11.70819783 | 1.46E-47    | 13.24905248 | 10.263775   | 3.03E-23    | COLLAGENS          | 1.131604767 | 1.290855702 |
| COL5A2   | 12.72768936 | 11.42975977 | 5.35E-41    | 12.72768936 | 9.799897727 | 1.27E-23    | COLLAGENS          | 1.113557031 | 1.298757366 |
| COL5A3   | 11.02522979 | 9.373327384 | 1.83E-94    | 11.02522979 | 9.206318182 | 2.11E-15    | COLLAGENS          | 1.176234365 | 1.197572099 |
| COL6A1   | 13.86867465 | 13.21081672 | 1.27E-18    | 13.86867465 | 11.89552727 | 1.48E-15    | COLLAGENS          | 1.049796916 | 1.165873049 |
| COL6A1   | 13.86867465 | 13.21081672 | 1.27E-18    | 13.86867465 | 11.89552727 | 1.48E-15    | BASEMENT_MEMBRANES | 1.049796916 | 1.165873049 |
| COL6A2   | 14.13536099 | 13.24389445 | 1.38E-23    | 14.13536099 | 12.363275   | 7.22E-13    | COLLAGENS          | 1.067311511 | 1.143334674 |
| COL6A2   | 14.13536099 | 13.24389445 | 1.38E-23    | 14.13536099 | 12.363275   | 7.22E-13    | BASEMENT_MEMBRANES | 1.067311511 | 1.143334674 |
| COL6A3   | 13.75072589 | 12.54847187 | 1.63E-23    | 13.75072589 | 11.27796818 | 9.27E-17    | BASEMENT_MEMBRANES | 1.095808799 | 1.219255602 |
| COL6A3   | 13.75072589 | 12.54847187 | 1.63E-23    | 13.75072589 | 11.27796818 | 9.27E-17    | COLLAGENS          | 1.095808799 | 1.219255602 |
| COL7A1   | 13.42070461 | 8.794812919 | 0           | 13.42070461 | 11.14698864 | 4.35E-26    | COLLAGENS          | 1.525979544 | 1.203975804 |
| COL8A2   | 9.681838652 | 8.872417403 | 1.37E-18    | 9.681838652 | 8.981990909 | 0.001004895 | COLLAGENS          | 1.091228942 | 1.077916773 |
| CRELD2   | 10.58404149 | 10.36891182 | 3.54E-09    | 10.58404149 | 10.11055    | 2.91E-06    | ECM_GLYCOPROTEINS  | 1.020747565 | 1.046831428 |
| CRISPLD2 | 10.38468511 | 10.21860656 | 0.029887909 | 10.38468511 | 9.622375    | 0.000251088 | ECM_GLYCOPROTEINS  | 1.016252563 | 1.079222656 |
| CRLF3    | 9.561390957 | 8.999731443 | 1.75E-48    | 9.561390957 | 9.312945455 | 0.013262946 | SECRETED_FACTORS   | 1.062408475 | 1.026677436 |
| CSF2     | 4.917521631 | 1.803928526 | 1.94E-247   | 4.917521631 | 1.779447727 | 1.20E-16    | SECRETED_FACTORS   | 2.726006912 | 2.763510024 |
| CSH2     | 0.50612961  | 0.354145385 | 0.000718265 | 0.50612961  | 0.027243182 | 0.005772246 | SECRETED_FACTORS   | 1.429157716 | 18.57821209 |
| CSPG4    | 11.51334344 | 10.21595992 | 8.57E-50    | 11.51334344 | 9.946181818 | 1.39E-07    | ECM_AFFILIATED     | 1.126995753 | 1.157564144 |
| CST1     | 6.577290957 | 4.974311134 | 3.28E-19    | 6.577290957 | 4.508120455 | 0.000403519 | ECM_REGULATORS     | 1.32225162  | 1.458987404 |
| CSTL1    | 0.795301773 | 0.531965836 | 3.24E-10    | 0.795301773 | 0.456052273 | 0.016950456 | ECM_REGULATORS     | 1.495024153 | 1.743882929 |
| CTHRC1   | 9.880125887 | 8.99135062  | 1.74E-15    | 9.880125887 | 6.681602273 | 3.89E-26    | ECM_GLYCOPROTEINS  | 1.098847804 | 1.478706077 |
| CTSB     | 15.5636984  | 15.22599296 | 9.42E-10    | 15.5636984  | 15.11861364 | 0.000245571 | ECM_REGULATORS     | 1.022179535 | 1.029439523 |
| CTSC     | 13.31164982 | 12.06247845 | 7.12E-79    | 13.31164982 | 12.156625   | 3.00E-13    | ECM_REGULATORS     | 1.103558434 | 1.095011964 |
| CTSK     | 11.05114326 | 10.316325   | 4.65E-16    | 11.05114326 | 9.913252273 | 2.69E-06    | ECM_REGULATORS     | 1.071228685 | 1.114784831 |
| CTSV     | 11.08001206 | 7.038075392 | 1.51E-301   | 11.08001206 | 9.122595455 | 2.65E-15    | ECM_REGULATORS     | 1.574295733 | 1.21456795  |
| CXCL1    | 10.01229291 | 6.587876067 | 1.75E-132   | 10.01229291 | 9.311431818 | 0.038088185 | SECRETED_FACTORS   | 1.519805899 | 1.075268885 |
| CXCL10   | 10.17109929 | 8.216557989 | 7.63E-65    | 10.17109929 | 7.718206818 | 8.83E-09    | SECRETED_FACTORS   | 1.237878355 | 1.317806005 |

|        |             |             |             |             |             |             |                    |             |             |
|--------|-------------|-------------|-------------|-------------|-------------|-------------|--------------------|-------------|-------------|
| CXCL11 | 8.059074113 | 6.317128309 | 1.18E-52    | 8.059074113 | 5.387018182 | 3.57E-09    | SECRETED_FACTORS   | 1.275749632 | 1.496017619 |
| CXCL13 | 8.683501064 | 6.126360231 | 1.29E-68    | 8.683501064 | 5.522095455 | 4.54E-19    | SECRETED_FACTORS   | 1.417399685 | 1.57250108  |
| CXCL3  | 6.127595922 | 5.265943317 | 7.62E-14    | 6.127595922 | 5.365513636 | 0.008202595 | SECRETED_FACTORS   | 1.163627398 | 1.142033426 |
| CXCL5  | 6.144514184 | 5.007960057 | 1.50E-14    | 6.144514184 | 4.388020455 | 3.53E-05    | SECRETED_FACTORS   | 1.226949519 | 1.400292968 |
| CXCL8  | 10.49552943 | 7.774415085 | 1.31E-111   | 10.49552943 | 8.950822727 | 2.29E-06    | SECRETED_FACTORS   | 1.350008884 | 1.172577064 |
| CXCL9  | 10.44496365 | 8.855705986 | 2.27E-35    | 10.44496365 | 8.271879545 | 8.54E-08    | SECRETED_FACTORS   | 1.179461431 | 1.262707417 |
| EGFL6  | 8.145789539 | 5.613663158 | 7.79E-82    | 8.145789539 | 6.792277273 | 8.94E-09    | SECRETED_FACTORS   | 1.451064895 | 1.199272234 |
| EGFLAM | 7.889874645 | 7.639742403 | 0.001291868 | 7.889874645 | 7.079447727 | 2.93E-05    | ECM_GLYCOPROTEINS  | 1.032740926 | 1.114476008 |
| EGLN3  | 10.46199149 | 9.469607858 | 8.70E-22    | 10.46199149 | 9.636084091 | 0.00184461  | ECM_REGULATORS     | 1.104796698 | 1.085709858 |
| EPO    | 2.394135993 | 2.125263975 | 0.002913864 | 2.394135993 | 1.706686364 | 0.013060045 | SECRETED_FACTORS   | 1.126512293 | 1.402797868 |
| F12    | 9.042606915 | 7.072578026 | 2.49E-74    | 9.042606915 | 8.526218182 | 0.004633166 | ECM_REGULATORS     | 1.278544667 | 1.060564804 |
| FBN1   | 11.47918032 | 11.2276634  | 0.001784653 | 11.47918032 | 10.79095682 | 0.012769299 | ECM_GLYCOPROTEINS  | 1.022401537 | 1.063777801 |
| FBN2   | 8.900113475 | 7.06951108  | 8.45E-61    | 8.900113475 | 6.250988636 | 1.92E-12    | ECM_GLYCOPROTEINS  | 1.258943281 | 1.423792938 |
| FGF11  | 9.828681028 | 7.455610263 | 1.09E-139   | 9.828681028 | 9.034220455 | 0.000184517 | SECRETED_FACTORS   | 1.318293296 | 1.087939029 |
| FGF19  | 2.173263298 | 1.87229003  | 0.010612808 | 2.173263298 | 0.557827273 | 0.000101682 | SECRETED_FACTORS   | 1.160751413 | 3.895943071 |
| FNDC1  | 8.842       | 8.254219536 | 1.36E-05    | 8.842       | 6.809625    | 6.12E-09    | ECM_GLYCOPROTEINS  | 1.071209696 | 1.298456229 |
| GPC1   | 13.63316241 | 11.38650372 | 3.91E-255   | 13.63316241 | 12.97210909 | 1.19E-06    | ECM_AFFILIATED     | 1.197308914 | 1.050959587 |
| GREM1  | 10.27995904 | 7.815446474 | 5.00E-58    | 10.27995904 | 7.713704545 | 4.19E-17    | ECM_AFFILIATED     | 1.315338679 | 1.332687684 |
| HAPLN1 | 5.888536348 | 5.192622214 | 1.54E-07    | 5.888536348 | 2.883011364 | 5.83E-25    | PROTEOGLYCANS      | 1.134019789 | 2.042495018 |
| HAPLN3 | 9.942170213 | 8.387811025 | 2.97E-92    | 9.942170213 | 9.083365909 | 1.21E-07    | PROTEOGLYCANS      | 1.18531166  | 1.094546924 |
| HMSD   | 4.224640426 | 2.728630736 | 1.40E-69    | 4.224640426 | 3.036027273 | 6.28E-05    | ECM_REGULATORS     | 1.548263886 | 1.391502792 |
| HSPG2  | 13.66084131 | 13.38147567 | 1.92E-05    | 13.66084131 | 12.84305909 | 5.53E-07    | BASEMENT_MEMBRANES | 1.020877043 | 1.063675034 |
| HSPG2  | 13.66084131 | 13.38147567 | 1.92E-05    | 13.66084131 | 12.84305909 | 5.53E-07    | PROTEOGLYCANS      | 1.020877043 | 1.063675034 |
| HTRA1  | 12.09709929 | 11.83951613 | 0.001648197 | 12.09709929 | 10.749425   | 9.10E-11    | ECM_REGULATORS     | 1.021756224 | 1.125371756 |
| HTRA3  | 10.29356773 | 9.168616141 | 2.76E-26    | 10.29356773 | 8.240006818 | 3.13E-13    | ECM_REGULATORS     | 1.122695898 | 1.249218351 |
| IBSP   | 4.392891489 | 3.203609632 | 1.18E-24    | 4.392891489 | 1.263134091 | 1.03E-19    | ECM_GLYCOPROTEINS  | 1.371231827 | 3.4777713   |
| IGFBP3 | 12.74142465 | 12.2994363  | 1.22E-06    | 12.74142465 | 11.46306136 | 1.05E-07    | ECM_GLYCOPROTEINS  | 1.035935659 | 1.111520234 |
| KCP    | 6.914541844 | 5.804015945 | 3.46E-28    | 6.914541844 | 6.235527273 | 0.002152512 | ECM_GLYCOPROTEINS  | 1.1913375   | 1.108894491 |
| LAMA1  | 7.705062234 | 7.464246593 | 0.042844921 | 7.705062234 | 5.303031818 | 6.17E-10    | BASEMENT_MEMBRANES | 1.032262552 | 1.452954178 |
| LAMA1  | 7.705062234 | 7.464246593 | 0.042844921 | 7.705062234 | 5.303031818 | 6.17E-10    | ECM_GLYCOPROTEINS  | 1.032262552 | 1.452954178 |
| LAMA3  | 13.33518741 | 9.549523324 | 3.57E-248   | 13.33518741 | 11.13958182 | 7.59E-16    | BASEMENT_MEMBRANES | 1.396424404 | 1.197099463 |
| LAMA3  | 13.33518741 | 9.549523324 | 3.57E-248   | 13.33518741 | 11.13958182 | 7.59E-16    | ECM_GLYCOPROTEINS  | 1.396424404 | 1.197099463 |
| LAMA5  | 12.86174521 | 12.24232562 | 2.69E-23    | 12.86174521 | 12.09035909 | 1.31E-10    | ECM_GLYCOPROTEINS  | 1.050596562 | 1.063801754 |
| LAMA5  | 12.86174521 | 12.24232562 | 2.69E-23    | 12.86174521 | 12.09035909 | 1.31E-10    | BASEMENT_MEMBRANES | 1.050596562 | 1.063801754 |
| LAMB1  | 12.51245621 | 12.20358609 | 2.34E-05    | 12.51245621 | 11.19618636 | 4.26E-17    | ECM_GLYCOPROTEINS  | 1.025309783 | 1.117564124 |
| LAMB1  | 12.51245621 | 12.20358609 | 2.34E-05    | 12.51245621 | 11.19618636 | 4.26E-17    | BASEMENT_MEMBRANES | 1.025309783 | 1.117564124 |
| LAMB3  | 14.67629291 | 10.41794833 | 1.96E-277   | 14.67629291 | 13.03279773 | 2.30E-15    | ECM_GLYCOPROTEINS  | 1.408750786 | 1.126104557 |
| LAMB3  | 14.67629291 | 10.41794833 | 1.96E-277   | 14.67629291 | 13.03279773 | 2.30E-15    | BASEMENT_MEMBRANES | 1.408750786 | 1.126104557 |
| LAMC1  | 12.95617128 | 12.82066114 | 0.019953475 | 12.95617128 | 11.89305682 | 1.51E-13    | BASEMENT_MEMBRANES | 1.010569668 | 1.089389505 |
| LAMC1  | 12.95617128 | 12.82066114 | 0.019953475 | 12.95617128 | 11.89305682 | 1.51E-13    | ECM_GLYCOPROTEINS  | 1.010569668 | 1.089389505 |
| LAMC2  | 14.71451206 | 9.673943753 | 1.30E-198   | 14.71451206 | 11.42653636 | 3.18E-26    | ECM_GLYCOPROTEINS  | 1.521045856 | 1.287749112 |
| LAMC2  | 14.71451206 | 9.673943753 | 1.30E-198   | 14.71451206 | 11.42653636 | 3.18E-26    | BASEMENT_MEMBRANES | 1.521045856 | 1.287749112 |
| LGALS1 | 13.23956294 | 12.66720456 | 9.28E-21    | 13.23956294 | 11.61540455 | 6.15E-14    | ECM_AFFILIATED     | 1.045184269 | 1.139827967 |
| LOX    | 10.29464043 | 9.47525591  | 5.32E-19    | 10.29464043 | 8.968677273 | 5.47E-08    | ECM_REGULATORS     | 1.086476241 | 1.14784378  |
| LOXL1  | 9.525580851 | 9.174167468 | 5.06E-05    | 9.525580851 | 8.799395455 | 0.000308855 | ECM_REGULATORS     | 1.038304662 | 1.082526737 |
| LOXL2  | 10.87377535 | 10.13900373 | 8.16E-22    | 10.87377535 | 7.924936364 | 1.03E-29    | ECM_REGULATORS     | 1.072469805 | 1.372096236 |

|          |             |             |             |             |             |             |                    |             |             |
|----------|-------------|-------------|-------------|-------------|-------------|-------------|--------------------|-------------|-------------|
| LTBP1    | 12.13962039 | 10.73405085 | 2.57E-81    | 12.13962039 | 10.62178409 | 5.42E-11    | ECM_GLYCOPROTEINS  | 1.13094493  | 1.142898433 |
| LTBP2    | 12.01934007 | 11.21481983 | 2.12E-21    | 12.01934007 | 11.17380227 | 7.87E-06    | ECM_GLYCOPROTEINS  | 1.071737242 | 1.075671448 |
| LUM      | 12.83399504 | 11.49733654 | 3.87E-22    | 12.83399504 | 10.91654318 | 2.93E-13    | PROTEOGLYCANS      | 1.1162581   | 1.175646431 |
| MFAP1    | 10.56507872 | 10.35962327 | 6.98E-21    | 10.56507872 | 10.41875227 | 0.010646991 | ECM_GLYCOPROTEINS  | 1.019832329 | 1.014044527 |
| MFAP2    | 10.90941702 | 8.904379745 | 2.70E-64    | 10.90941702 | 7.977972727 | 4.73E-30    | ECM_GLYCOPROTEINS  | 1.225174278 | 1.367442256 |
| MMP1     | 12.68449504 | 6.509346419 | 9.05E-286   | 12.68449504 | 7.607865909 | 2.10E-26    | ECM_REGULATORS     | 1.948658777 | 1.667286883 |
| MMP10    | 10.23030355 | 4.176157259 | 0           | 10.23030355 | 6.923118182 | 1.51E-11    | ECM_REGULATORS     | 2.449693082 | 1.477701706 |
| MMP11    | 11.05668812 | 9.817103461 | 1.50E-23    | 11.05668812 | 6.673270455 | 6.14E-30    | ECM_REGULATORS     | 1.126267861 | 1.656861983 |
| MMP12    | 10.06848564 | 5.248954386 | 7.94E-187   | 10.06848564 | 6.373284091 | 6.33E-27    | ECM_REGULATORS     | 1.918188823 | 1.579795517 |
| MMP13    | 9.423479078 | 3.879871474 | 1.96E-236   | 9.423479078 | 4.072188636 | 7.78E-21    | ECM_REGULATORS     | 2.428812176 | 2.314106717 |
| MMP14    | 14.19266507 | 12.80056123 | 8.42E-76    | 14.19266507 | 12.78506591 | 8.69E-22    | ECM_REGULATORS     | 1.108753344 | 1.110097138 |
| MMP17    | 7.641632624 | 6.561373182 | 7.99E-27    | 7.641632624 | 6.440379545 | 6.47E-09    | ECM_REGULATORS     | 1.164639232 | 1.186518989 |
| MMP19    | 8.607979078 | 7.869768524 | 7.14E-23    | 8.607979078 | 7.177961364 | 2.95E-12    | ECM_REGULATORS     | 1.093803338 | 1.199223379 |
| MMP2     | 12.99935195 | 12.20524881 | 1.55E-19    | 12.99935195 | 11.67833182 | 2.58E-07    | ECM_REGULATORS     | 1.065062429 | 1.113117195 |
| MMP25    | 7.006467021 | 6.273813703 | 2.17E-29    | 7.006467021 | 6.292288636 | 0.000270202 | ECM_REGULATORS     | 1.116779578 | 1.113500576 |
| MMP28    | 9.381712943 | 6.980837886 | 1.72E-147   | 9.381712943 | 8.479990909 | 0.001574075 | ECM_REGULATORS     | 1.343923623 | 1.10633526  |
| MMP3     | 10.09752518 | 4.050837788 | 5.36E-304   | 10.09752518 | 6.433013636 | 7.50E-15    | ECM_REGULATORS     | 2.49270045  | 1.569641501 |
| MMP7     | 9.027723404 | 8.186261406 | 2.85E-06    | 9.027723404 | 7.051911364 | 1.28E-05    | ECM_REGULATORS     | 1.102789534 | 1.280181066 |
| MMP8     | 2.558814539 | 2.003374782 | 3.55E-08    | 2.558814539 | 0.998368182 | 5.69E-07    | ECM_REGULATORS     | 1.277252046 | 2.562996884 |
| MMP9     | 11.62381312 | 9.218202699 | 1.34E-85    | 11.62381312 | 7.799352273 | 4.13E-29    | ECM_REGULATORS     | 1.260963064 | 1.490356213 |
| MXRA5    | 11.9320406  | 10.96681191 | 6.89E-18    | 11.9320406  | 11.27       | 0.008792321 | ECM_GLYCOPROTEINS  | 1.088013609 | 1.05874362  |
| NELL2    | 10.07812039 | 7.786844362 | 5.96E-86    | 10.07812039 | 7.361497727 | 1.34E-13    | ECM_GLYCOPROTEINS  | 1.294249624 | 1.369031244 |
| NPNT     | 10.70802979 | 10.23714763 | 6.68E-05    | 10.70802979 | 9.329920455 | 3.13E-10    | ECM_GLYCOPROTEINS  | 1.045997399 | 1.147708583 |
| NPNT     | 10.70802979 | 10.23714763 | 6.68E-05    | 10.70802979 | 9.329920455 | 3.13E-10    | BASEMENT_MEMBRANES | 1.045997399 | 1.147708583 |
| P4HA2    | 11.68479043 | 10.62915453 | 9.97E-63    | 11.68479043 | 10.56820455 | 1.18E-13    | ECM_REGULATORS     | 1.099315133 | 1.105655211 |
| PAPLN    | 9.446656738 | 9.232874075 | 0.005014819 | 9.446656738 | 8.482959091 | 8.09E-07    | ECM_GLYCOPROTEINS  | 1.023154509 | 1.113603948 |
| PAPLN    | 9.446656738 | 9.232874075 | 0.005014819 | 9.446656738 | 8.482959091 | 8.09E-07    | BASEMENT_MEMBRANES | 1.023154509 | 1.113603948 |
| PLAU     | 12.92889716 | 10.34115838 | 5.05E-183   | 12.92889716 | 10.50826136 | 3.43E-25    | ECM_REGULATORS     | 1.250236839 | 1.2303555   |
| PLXNA1   | 12.77613812 | 11.39477878 | 6.11E-139   | 12.77613812 | 11.51009091 | 5.86E-23    | ECM_AFFILIATED     | 1.121227395 | 1.109994545 |
| PLXNB2   | 13.8183516  | 13.65677356 | 2.54E-05    | 13.8183516  | 13.61067273 | 0.029434193 | ECM_AFFILIATED     | 1.011831347 | 1.015258531 |
| PLXNB3   | 9.12092039  | 8.229032259 | 7.74E-15    | 9.12092039  | 8.265372727 | 1.16E-07    | ECM_AFFILIATED     | 1.108383113 | 1.103509871 |
| PODNL1   | 8.254925355 | 6.502546702 | 7.54E-75    | 8.254925355 | 7.558140909 | 0.000436448 | PROTEOGLYCANS      | 1.269491129 | 1.092189925 |
| POSTN    | 12.17274202 | 10.82205528 | 1.15E-18    | 12.17274202 | 9.266120455 | 1.64E-16    | ECM_GLYCOPROTEINS  | 1.124808709 | 1.313682687 |
| SDC1     | 15.40230408 | 12.08857194 | 1.92E-204   | 15.40230408 | 14.80989318 | 0.000106916 | ECM_AFFILIATED     | 1.274121058 | 1.040001024 |
| SEMA3C   | 11.11344663 | 9.935833391 | 3.90E-25    | 11.11344663 | 10.06454091 | 3.30E-05    | ECM_AFFILIATED     | 1.118521838 | 1.10421794  |
| SEMA4B   | 13.2726672  | 11.68045987 | 3.01E-203   | 13.2726672  | 12.86804318 | 0.004110259 | ECM_AFFILIATED     | 1.136313753 | 1.031444098 |
| SEMA7A   | 9.143028191 | 8.367978994 | 2.34E-27    | 9.143028191 | 8.04295     | 6.16E-11    | ECM_AFFILIATED     | 1.092620834 | 1.136775461 |
| SERPINA9 | 2.749595745 | 1.30724655  | 1.30E-72    | 2.749595745 | 0.999440909 | 3.83E-07    | ECM_REGULATORS     | 2.103349016 | 2.751133879 |
| SERPINB7 | 8.374102837 | 2.707530387 | 0           | 8.374102837 | 7.466768182 | 0.009968649 | ECM_REGULATORS     | 3.092893389 | 1.121516382 |
| SERPINE1 | 12.7405383  | 10.57539853 | 4.26E-112   | 12.7405383  | 9.908793182 | 3.18E-19    | ECM_REGULATORS     | 1.204733634 | 1.285781029 |
| SERPINE2 | 11.3924789  | 10.83624116 | 2.42E-08    | 11.3924789  | 10.39336591 | 0.000125248 | ECM_REGULATORS     | 1.051331244 | 1.096129877 |
| SERPINH1 | 13.20814628 | 12.63826873 | 8.31E-21    | 13.20814628 | 11.16637955 | 1.91E-27    | ECM_REGULATORS     | 1.045091425 | 1.182849483 |
| SPON2    | 11.01452234 | 10.30146379 | 1.29E-12    | 11.01452234 | 10.29451136 | 0.000431021 | ECM_GLYCOPROTEINS  | 1.069219148 | 1.069941248 |
| SULF1    | 11.33008014 | 11.06337253 | 0.0128019   | 11.33008014 | 9.711231818 | 4.44E-09    | ECM_REGULATORS     | 1.024107261 | 1.166698556 |
| SULF2    | 13.04080142 | 11.77359221 | 4.14E-73    | 13.04080142 | 12.10724773 | 6.80E-06    | ECM_REGULATORS     | 1.107631485 | 1.077107012 |
| TGFBI    | 14.05956844 | 12.19407224 | 3.39E-103   | 14.05956844 | 11.25018409 | 1.31E-21    | ECM_GLYCOPROTEINS  | 1.152983857 | 1.249718967 |

|                |             |             |           |             |             |             |                   |             |             |
|----------------|-------------|-------------|-----------|-------------|-------------|-------------|-------------------|-------------|-------------|
| <b>TGM4</b>    | 3.408146454 | 1.955925218 | 1.67E-44  | 3.408146454 | 2.311361364 | 1.60E-06    | ECM_REGULATORS    | 1.742472781 | 1.47451909  |
| <b>THBS2</b>   | 11.90535124 | 11.14111553 | 2.13E-14  | 11.90535124 | 10.28936136 | 1.42E-08    | ECM_GLYCOPROTEINS | 1.068595977 | 1.157054439 |
| <b>TINAGL1</b> | 11.080425   | 10.43268998 | 5.39E-14  | 11.080425   | 9.852768182 | 4.88E-08    | ECM_GLYCOPROTEINS | 1.062087058 | 1.124600193 |
| <b>TNC</b>     | 14.30787305 | 11.74784416 | 9.39E-139 | 14.30787305 | 12.53642273 | 1.05E-09    | ECM_GLYCOPROTEINS | 1.217914782 | 1.141304291 |
| <b>TNFAIP6</b> | 7.613089894 | 6.48153929  | 8.80E-25  | 7.613089894 | 6.1573      | 2.38E-08    | ECM_GLYCOPROTEINS | 1.174580536 | 1.23643316  |
| <b>TSKU</b>    | 11.90481312 | 10.73257483 | 2.85E-53  | 11.90481312 | 11.61267727 | 0.012422396 | ECM_GLYCOPROTEINS | 1.109222467 | 1.025156632 |
| <b>WISP1</b>   | 8.281605142 | 7.293077917 | 7.09E-23  | 8.281605142 | 5.257627273 | 1.10E-25    | ECM_GLYCOPROTEINS | 1.135543215 | 1.575160184 |
| <b>WISP3</b>   | 5.01121117  | 4.005596049 | 7.55E-29  | 5.01121117  | 3.625781818 | 0.000628306 | ECM_GLYCOPROTEINS | 1.251052555 | 1.382104997 |
| <b>WNT10A</b>  | 8.857202837 | 5.674497355 | 1.15E-162 | 8.857202837 | 7.922647727 | 0.001863564 | SECRETED_FACTORS  | 1.560878838 | 1.117959947 |
| <b>WNT10B</b>  | 5.586805496 | 4.127468111 | 5.80E-69  | 5.586805496 | 5.049140909 | 0.031350554 | SECRETED_FACTORS  | 1.35356721  | 1.10648635  |
| <b>WNT2</b>    | 6.210688121 | 5.484353537 | 3.34E-08  | 6.210688121 | 3.074609091 | 3.50E-17    | SECRETED_FACTORS  | 1.132437593 | 2.019992766 |
| <b>WNT2B</b>   | 8.482610993 | 7.515716369 | 4.57E-40  | 8.482610993 | 7.712663636 | 0.002328686 | SECRETED_FACTORS  | 1.128649696 | 1.099828982 |
| <b>WNT3A</b>   | 7.17197766  | 2.46023867  | 0         | 7.17197766  | 6.539538636 | 0.012500959 | SECRETED_FACTORS  | 2.915155244 | 1.096710037 |
| <b>WNT7A</b>   | 7.420093972 | 3.42596503  | 1.87E-167 | 7.420093972 | 5.332127273 | 1.67E-07    | SECRETED_FACTORS  | 2.165840546 | 1.391582307 |
| <b>WNT7B</b>   | 11.18605248 | 6.71497389  | 3.44E-185 | 11.18605248 | 9.545902273 | 3.29E-14    | SECRETED_FACTORS  | 1.665837078 | 1.171817201 |
| <b>XCL1</b>    | 5.053192199 | 4.009227797 | 4.28E-34  | 5.053192199 | 3.732634091 | 1.13E-07    | SECRETED_FACTORS  | 1.260390393 | 1.353787185 |
| <b>ZP3</b>     | 8.373817553 | 7.723563354 | 1.13E-23  | 8.373817553 | 7.464363636 | 1.66E-07    | ECM_GLYCOPROTEINS | 1.084190958 | 1.121839444 |
| <b>ZP4</b>     | 1.205608511 | 0.317821985 | 2.47E-87  | 1.205608511 | 0.260545455 | 3.44E-05    | ECM_GLYCOPROTEINS | 3.793345227 | 4.627248296 |

**Kidney Chromophobe Cell Carcinoma (KICH)**

| Signature genes | Expression in tumor | Expression in rest of Pan-Cancer | P-value     | Expression in tumor | Expression in normal tissue | P-value     | Matrisome category | Fold change vs. Pan-Cancer | Fold change vs. normal |
|-----------------|---------------------|----------------------------------|-------------|---------------------|-----------------------------|-------------|--------------------|----------------------------|------------------------|
| ADAM2           | 4.082815385         | 0.556721136                      | 5.39E-105   | 4.082815385         | 1.313852                    | 3.68E-05    | ECM_REGULATORS     | 7.333681301                | 3.107515447            |
| ADAMTSL1        | 10.45967363         | 6.85884034                       | 1.05E-64    | 10.45967363         | 8.640016                    | 0.001427815 | ECM_REGULATORS     | 1.524991559                | 1.210608132            |
| AMBN            | 0.737930769         | 0.363815372                      | 0.000581757 | 0.737930769         | 0.225992                    | 0.001785494 | ECM_GLYCOPROTEINS  | 2.028311135                | 3.265295981            |
| ANGPT1          | 10.58045165         | 7.036744816                      | 1.62E-62    | 10.58045165         | 9.336088                    | 0.000260589 | SECRETED_FACTORS   | 1.503600304                | 1.133285338            |
| CCBE1           | 9.417736264         | 4.770810695                      | 3.07E-70    | 9.417736264         | 7.967592                    | 0.000863116 | SECRETED_FACTORS   | 1.974032689                | 1.182005337            |
| COCH            | 7.982751648         | 6.597409565                      | 1.59E-07    | 7.982751648         | 6.509388                    | 0.008609444 | ECM_GLYCOPROTEINS  | 1.209982732                | 1.22634442             |
| CTSA            | 13.80329121         | 12.75228011                      | 1.41E-26    | 13.80329121         | 13.024148                   | 7.14E-06    | ECM_REGULATORS     | 1.082417504                | 1.05982297             |
| CTSD            | 17.0778033          | 15.04259047                      | 6.83E-80    | 17.0778033          | 15.668436                   | 2.48E-09    | ECM_REGULATORS     | 1.135296699                | 1.089949456            |
| EDA             | 9.3144              | 7.1486447                        | 4.82E-29    | 9.3144              | 8.330912                    | 0.000247674 | SECRETED_FACTORS   | 1.302960266                | 1.118052861            |
| EGLN2           | 11.86002967         | 11.46866805                      | 2.22E-08    | 11.86002967         | 11.25576                    | 2.19E-06    | ECM_REGULATORS     | 1.034124418                | 1.053685373            |
| ELSPBP1         | 1.735616484         | 0.400242473                      | 2.00E-28    | 1.735616484         | 0.644264                    | 0.022405719 | ECM_GLYCOPROTEINS  | 4.336412556                | 2.693952298            |
| ESM1            | 9.752767033         | 7.370375887                      | 1.88E-23    | 9.752767033         | 8.584032                    | 0.000567929 | PROTEOGLYCANS      | 1.323238758                | 1.136152222            |
| F7              | 5.671462637         | 3.953165836                      | 9.00E-08    | 5.671462637         | 4.243908                    | 0.00187656  | ECM_REGULATORS     | 1.434663475                | 1.336377376            |
| FBN3            | 9.929897802         | 4.399688545                      | 7.07E-53    | 9.929897802         | 7.456724                    | 0.000142475 | ECM_GLYCOPROTEINS  | 2.256954714                | 1.331670289            |
| FGF13           | 9.153572527         | 7.191609269                      | 2.74E-16    | 9.153572527         | 8.092036                    | 0.000326565 | SECRETED_FACTORS   | 1.272812827                | 1.131182873            |
| FGF14           | 8.339159341         | 5.464790762                      | 3.30E-27    | 8.339159341         | 6.307288                    | 0.0009575   | SECRETED_FACTORS   | 1.525979622                | 1.322146593            |
| GAS6            | 13.99842637         | 11.70844753                      | 9.08E-50    | 13.99842637         | 13.270436                   | 4.68E-05    | ECM_GLYCOPROTEINS  | 1.195583474                | 1.05485806             |
| GLDN            | 8.507069231         | 6.26903598                       | 1.41E-21    | 8.507069231         | 5.056184                    | 5.50E-06    | ECM_GLYCOPROTEINS  | 1.356997991                | 1.682507842            |
| ITIH1           | 3.240041758         | 2.262396326                      | 0.005539042 | 3.240041758         | 1.097                       | 4.62E-06    | ECM_REGULATORS     | 1.43212828                 | 2.953547637            |
| LAMA5           | 12.92159341         | 12.27180755                      | 2.20E-05    | 12.92159341         | 12.517688                   | 0.024712695 | ECM_GLYCOPROTEINS  | 1.052949482                | 1.032266774            |
| LAMA5           | 12.92159341         | 12.27180755                      | 2.20E-05    | 12.92159341         | 12.517688                   | 0.024712695 | BASEMENT_MEMBRANES | 1.052949482                | 1.032266774            |
| LAMB4           | 8.088335165         | 2.812860536                      | 2.10E-200   | 8.088335165         | 6.927324                    | 0.023507155 | ECM_GLYCOPROTEINS  | 2.875483893                | 1.167598796            |
| LAMB4           | 8.088335165         | 2.812860536                      | 2.10E-200   | 8.088335165         | 6.927324                    | 0.023507155 | BASEMENT_MEMBRANES | 2.875483893                | 1.167598796            |
| LGALS3          | 14.31726374         | 12.37218833                      | 7.24E-26    | 14.31726374         | 12.24306                    | 1.75E-09    | ECM_AFFILIATED     | 1.15721353                 | 1.169418735            |
| LMAN1           | 13.23705604         | 12.33211867                      | 8.96E-26    | 13.23705604         | 12.767116                   | 0.006457524 | ECM_AFFILIATED     | 1.073380528                | 1.03680863             |
| MEPE            | 1.693049451         | 1.017366121                      | 3.39E-05    | 1.693049451         | 0.576976                    | 0.000549147 | ECM_GLYCOPROTEINS  | 1.664149626                | 2.93434987             |
| MMP15           | 11.55500769         | 10.78826829                      | 2.58E-06    | 11.55500769         | 10.702056                   | 0.000259217 | ECM_REGULATORS     | 1.071071592                | 1.079699797            |
| MMP24           | 11.26327582         | 6.583126742                      | 8.91E-89    | 11.26327582         | 9.643124                    | 3.94E-05    | ECM_REGULATORS     | 1.710931031                | 1.168011095            |
| MMP26           | 2.326157143         | 0.445473057                      | 8.39E-36    | 2.326157143         | 0.384288                    | 0.000184698 | ECM_REGULATORS     | 5.221768419                | 6.053161022            |
| MUC20           | 14.11225495         | 8.917898849                      | 2.07E-77    | 14.11225495         | 12.263312                   | 0.00083432  | ECM_AFFILIATED     | 1.582464119                | 1.150770277            |
| MUCL1           | 3.848931868         | 2.809124356                      | 0.004956504 | 3.848931868         | 1.76462                     | 0.003099099 | ECM_AFFILIATED     | 1.370153607                | 2.181167542            |
| NTN1            | 11.17801758         | 8.63186912                       | 2.03E-25    | 11.17801758         | 8.423124                    | 5.74E-10    | ECM_GLYCOPROTEINS  | 1.294970698                | 1.327063164            |
| NTN1            | 11.17801758         | 8.63186912                       | 2.03E-25    | 11.17801758         | 8.423124                    | 5.74E-10    | BASEMENT_MEMBRANES | 1.294970698                | 1.327063164            |
| NTN3            | 2.76332967          | 2.20448523                       | 0.001396752 | 2.76332967          | 1.88634                     | 0.014367241 | ECM_GLYCOPROTEINS  | 1.253503372                | 1.464916012            |
| NTN3            | 2.76332967          | 2.20448523                       | 0.001396752 | 2.76332967          | 1.88634                     | 0.014367241 | BASEMENT_MEMBRANES | 1.253503372                | 1.464916012            |
| OGFOD2          | 9.536465934         | 9.056172382                      | 6.57E-12    | 9.536465934         | 9.146448                    | 0.000325649 | ECM_REGULATORS     | 1.053034939                | 1.042641464            |
| PRSS1           | 3.109471429         | 2.259461729                      | 0.013080291 | 3.109471429         | 0.582472                    | 6.17E-05    | ECM_REGULATORS     | 1.376200087                | 5.338404985            |
| SDC4            | 14.98805824         | 12.74528157                      | 5.19E-34    | 14.98805824         | 14.201924                   | 1.60E-05    | ECM_AFFILIATED     | 1.175969174                | 1.055354066            |
| SEMA3C          | 11.78956264         | 10.13217717                      | 2.59E-09    | 11.78956264         | 10.273432                   | 0.000409658 | ECM_AFFILIATED     | 1.163576439                | 1.147577814            |
| SEMA3F          | 11.99166923         | 10.55298595                      | 1.50E-13    | 11.99166923         | 11.052212                   | 0.00018665  | ECM_AFFILIATED     | 1.136329499                | 1.085001738            |
| SEMA6B          | 9.723021978         | 8.737020281                      | 1.86E-10    | 9.723021978         | 8.978488                    | 0.042820798 | ECM_AFFILIATED     | 1.112853314                | 1.082924205            |
| SERPINI1        | 10.6349             | 7.887681936                      | 8.00E-58    | 10.6349             | 9.182568                    | 3.81E-06    | ECM_REGULATORS     | 1.348292196                | 1.158161856            |



|                |             |             |          |             |           |             |                   |             |             |
|----------------|-------------|-------------|----------|-------------|-----------|-------------|-------------------|-------------|-------------|
| <b>SFTPB</b>   | 8.603405495 | 4.253465498 | 1.17E-14 | 8.603405495 | 4.432088  | 4.40E-07    | ECM_AFFILIATED    | 2.022681387 | 1.941163058 |
| <b>SLIT2</b>   | 11.10335934 | 8.224947487 | 2.04E-35 | 11.10335934 | 8.929716  | 2.30E-05    | ECM_GLYCOPROTEINS | 1.349961122 | 1.24341685  |
| <b>SMOC1</b>   | 9.778545055 | 7.171748427 | 3.49E-13 | 9.778545055 | 7.537304  | 0.000893658 | ECM_GLYCOPROTEINS | 1.363481326 | 1.297353146 |
| <b>SPARCL1</b> | 14.29788791 | 12.32108392 | 6.97E-17 | 14.29788791 | 12.616812 | 0.000179104 | ECM_GLYCOPROTEINS | 1.160440754 | 1.133240942 |
| <b>ST14</b>    | 13.92157582 | 11.7281401  | 2.62E-15 | 13.92157582 | 12.955956 | 0.000117234 | ECM_REGULATORS    | 1.187023322 | 1.074530959 |
| <b>WFIKKN1</b> | 6.769836264 | 4.942840678 | 4.07E-27 | 6.769836264 | 6.055988  | 0.019976603 | SECRETED_FACTORS  | 1.369624616 | 1.117874782 |
| <b>VWF</b>     | 12.76904176 | 12.07067299 | 2.41E-06 | 12.76904176 | 11.383168 | 4.30E-05    | ECM_GLYCOPROTEINS | 1.057856655 | 1.121747633 |

**Kidney Clear Cell Carcinoma (KIRC)**

| Signature genes | Expression in tumor | Expression in rest of Pan-Cancer | P-value   | Expression in tumor | Expression in normal tissue | P-value     | Matrisome category | Fold change vs. Pan-Cancer | Fold change vs. normal |
|-----------------|---------------------|----------------------------------|-----------|---------------------|-----------------------------|-------------|--------------------|----------------------------|------------------------|
| A2M             | 15.70100149         | 14.02514141                      | 5.57E-110 | 15.70100149         | 15.48531111                 | 0.035654791 | ECM_REGULATORS     | 1.11948971                 | 1.013928708            |
| ACAN            | 9.72783466          | 6.316032264                      | 1.80E-263 | 9.72783466          | 7.435811111                 | 7.22E-21    | PROTEOGLYCANS      | 1.540181281                | 1.308241228            |
| ADAM18          | 3.200157877         | 0.293273311                      | 0         | 3.200157877         | 0.136519444                 | 1.52E-20    | ECM_REGULATORS     | 10.91186194                | 23.44104087            |
| ADAM28          | 9.036876285         | 7.966519172                      | 1.62E-38  | 9.036876285         | 7.827138889                 | 1.86E-16    | ECM_REGULATORS     | 1.134356937                | 1.154556782            |
| ADAM9           | 12.57898557         | 11.75748795                      | 1.65E-51  | 12.57898557         | 12.29076806                 | 0.00220817  | ECM_REGULATORS     | 1.069870165                | 1.023449919            |
| ADAMTS10        | 8.550409453         | 7.606247466                      | 1.91E-49  | 8.550409453         | 6.801998611                 | 7.70E-22    | ECM_REGULATORS     | 1.124129801                | 1.257043693            |
| ADAMTS18        | 5.619278441         | 3.755358034                      | 1.45E-82  | 5.619278441         | 4.660552778                 | 5.63E-07    | ECM_REGULATORS     | 1.496336272                | 1.205710719            |
| ADAMTS4         | 10.82078358         | 9.142641237                      | 1.73E-106 | 10.82078358         | 8.412451389                 | 9.53E-26    | ECM_REGULATORS     | 1.183551153                | 1.286281856            |
| ADAMTS5         | 10.12485904         | 7.573374989                      | 6.80E-229 | 10.12485904         | 9.530538889                 | 4.03E-06    | ECM_REGULATORS     | 1.336901851                | 1.062359553            |
| ADAMTS7         | 8.48764461          | 8.054007021                      | 2.49E-11  | 8.48764461          | 6.316693056                 | 3.87E-40    | ECM_REGULATORS     | 1.053841223                | 1.343684826            |
| ADAMTSL4        | 9.131905307         | 8.831679561                      | 7.65E-05  | 9.131905307         | 7.438222222                 | 3.23E-24    | ECM_REGULATORS     | 1.033994185                | 1.227699984            |
| AGRN            | 14.00731376         | 13.21223926                      | 1.39E-48  | 14.00731376         | 13.79238889                 | 0.02006401  | BASEMENT_MEMBRANES | 1.06017712                 | 1.015582861            |
| AGRN            | 14.00731376         | 13.21223926                      | 1.39E-48  | 14.00731376         | 13.79238889                 | 0.02006401  | ECM_GLYCOPROTEINS  | 1.06017712                 | 1.015582861            |
| AGT             | 11.19882537         | 8.26131118                       | 2.90E-86  | 11.19882537         | 9.989651389                 | 1.11E-07    | ECM_REGULATORS     | 1.355574815                | 1.121042661            |
| ANGPT2          | 11.42097861         | 8.447859692                      | 0         | 11.42097861         | 8.524740278                 | 3.74E-39    | SECRETED_FACTORS   | 1.351937535                | 1.339745052            |
| ANGPT4          | 4.893195688         | 2.985718317                      | 6.32E-122 | 4.893195688         | 4.170411111                 | 9.07E-05    | SECRETED_FACTORS   | 1.638867156                | 1.173312548            |
| ANGPTL2         | 11.33397944         | 10.42380202                      | 6.24E-35  | 11.33397944         | 10.09700556                 | 1.85E-16    | SECRETED_FACTORS   | 1.087317221                | 1.122508983            |
| ANGPTL4         | 13.67519701         | 9.073770735                      | 0         | 13.67519701         | 8.673445833                 | 9.46E-49    | SECRETED_FACTORS   | 1.50711291                 | 1.576674055            |
| ANXA13          | 8.106730182         | 3.573841375                      | 2.63E-254 | 8.106730182         | 6.476006944                 | 2.28E-06    | ECM_AFFILIATED     | 2.268351987                | 1.251809989            |
| ANXA4           | 14.43841128         | 11.74772896                      | 0         | 14.43841128         | 12.88178333                 | 1.29E-35    | ECM_AFFILIATED     | 1.229038508                | 1.120839476            |
| ANXA5           | 13.85351526         | 13.35401873                      | 4.38E-30  | 13.85351526         | 13.39930139                 | 3.69E-16    | ECM_AFFILIATED     | 1.037404211                | 1.033898325            |
| ANXA6           | 12.77003367         | 12.23624529                      | 1.45E-24  | 12.77003367         | 12.48158194                 | 6.93E-05    | ECM_AFFILIATED     | 1.043623543                | 1.023110189            |
| BDNF            | 6.437959701         | 5.149569943                      | 1.30E-48  | 6.437959701         | 5.1248875                   | 1.76E-09    | SECRETED_FACTORS   | 1.250193661                | 1.256214834            |
| BGN             | 14.6958325          | 13.16003454                      | 1.95E-75  | 14.6958325          | 13.89452361                 | 6.82E-07    | PROTEOGLYCANS      | 1.116701666                | 1.057670843            |
| BMP2            | 9.390164179         | 7.930017789                      | 8.09E-47  | 9.390164179         | 8.684381944                 | 1.13E-07    | SECRETED_FACTORS   | 1.184129018                | 1.081270289            |
| C1QA            | 12.37058905         | 11.42867589                      | 1.21E-37  | 12.37058905         | 9.954880556                 | 1.74E-36    | ECM_AFFILIATED     | 1.082416649                | 1.242665744            |
| C1QB            | 12.47623002         | 11.59366766                      | 5.00E-30  | 12.47623002         | 9.824451389                 | 1.57E-38    | ECM_AFFILIATED     | 1.076124517                | 1.269916204            |
| C1QC            | 12.22649685         | 11.43836338                      | 5.25E-26  | 12.22649685         | 9.682797222                 | 1.92E-37    | ECM_AFFILIATED     | 1.068902643                | 1.262702974            |
| C1QL1           | 7.913460697         | 5.832533995                      | 1.32E-59  | 7.913460697         | 4.984013889                 | 2.08E-15    | ECM_AFFILIATED     | 1.356779181                | 1.587768588            |
| C1QL4           | 5.976339801         | 3.416379244                      | 9.45E-108 | 5.976339801         | 4.105866667                 | 1.95E-08    | ECM_AFFILIATED     | 1.749319784                | 1.4555611              |
| C1QTNF1         | 10.57609784         | 9.796196717                      | 1.38E-27  | 10.57609784         | 9.7274625                   | 1.50E-07    | ECM_AFFILIATED     | 1.079612645                | 1.087241184            |
| C1QTNF5         | 10.41621177         | 9.229578758                      | 2.06E-67  | 10.41621177         | 9.720984722                 | 2.88E-09    | ECM_AFFILIATED     | 1.128568491                | 1.071518171            |
| CBLN3           | 7.894085738         | 6.674096505                      | 4.25E-123 | 7.894085738         | 6.601611111                 | 6.88E-22    | SECRETED_FACTORS   | 1.182794665                | 1.195781697            |
| CBLN4           | 6.144408955         | 3.16523712                       | 2.52E-171 | 6.144408955         | 4.858958333                 | 1.14E-07    | SECRETED_FACTORS   | 1.941216004                | 1.264552716            |
| CCL15           | 6.716117579         | 2.358480184                      | 1.45E-219 | 6.716117579         | 5.998088889                 | 0.009232839 | SECRETED_FACTORS   | 2.847646389                | 1.119709578            |
| CCL20           | 7.643207463         | 5.937788081                      | 1.91E-32  | 7.643207463         | 5.1621125                   | 9.42E-15    | SECRETED_FACTORS   | 1.287214592                | 1.480635585            |
| CCL28           | 9.394191045         | 7.846971484                      | 3.40E-55  | 9.394191045         | 8.237198611                 | 9.50E-09    | SECRETED_FACTORS   | 1.197174103                | 1.140459456            |
| CCL3            | 7.775709121         | 7.442840382                      | 3.78E-06  | 7.775709121         | 6.108431944                 | 2.47E-16    | SECRETED_FACTORS   | 1.044723348                | 1.272946837            |
| CCL3L3          | 5.880202819         | 5.502708425                      | 2.98E-06  | 5.880202819         | 4.569527778                 | 9.90E-08    | SECRETED_FACTORS   | 1.068601562                | 1.286829429            |
| CCL4            | 8.653224046         | 7.664904751                      | 7.20E-44  | 8.653224046         | 6.309963889                 | 3.95E-31    | SECRETED_FACTORS   | 1.128940845                | 1.371358727            |
| CCL4L2          | 7.182091874         | 6.474404508                      | 4.96E-18  | 7.182091874         | 5.100302778                 | 1.58E-16    | SECRETED_FACTORS   | 1.109305399                | 1.408169708            |
| CCL5            | 10.46199353         | 9.337918444                      | 2.27E-39  | 10.46199353         | 7.666788889                 | 7.64E-36    | SECRETED_FACTORS   | 1.12037748                 | 1.364586098            |

|         |             |             |             |             |             |             |                    |             |             |
|---------|-------------|-------------|-------------|-------------|-------------|-------------|--------------------|-------------|-------------|
| CD109   | 11.34672322 | 9.706693571 | 1.18E-86    | 11.34672322 | 10.44636389 | 4.11E-10    | ECM_REGULATORS     | 1.16895863  | 1.086188777 |
| CD209   | 7.545014096 | 6.79707709  | 6.37E-19    | 7.545014096 | 6.678206944 | 1.38E-06    | ECM_AFFILIATED     | 1.110038035 | 1.12979639  |
| CDCP2   | 1.508277612 | 0.839142293 | 4.33E-68    | 1.508277612 | 1.146961111 | 0.002896403 | ECM_GLYCOPROTEINS  | 1.797403878 | 1.315020708 |
| CHRD    | 8.579543947 | 7.613930184 | 1.11E-30    | 8.579543947 | 8.234683333 | 0.02320428  | SECRETED_FACTORS   | 1.126821988 | 1.041879038 |
| CLEC10A | 7.000780763 | 6.170362648 | 1.44E-20    | 7.000780763 | 6.313555556 | 0.000240295 | ECM_AFFILIATED     | 1.134581736 | 1.108849158 |
| CLEC12A | 6.440212438 | 5.032945365 | 7.25E-55    | 6.440212438 | 3.9739375   | 6.38E-32    | ECM_AFFILIATED     | 1.279611037 | 1.620612412 |
| CLEC12B | 2.187917081 | 1.694381166 | 1.77E-12    | 2.187917081 | 0.521280556 | 9.28E-19    | ECM_AFFILIATED     | 1.291277976 | 4.197196803 |
| CLEC14A | 11.20403881 | 8.897483098 | 0           | 11.20403881 | 10.16789028 | 2.92E-13    | ECM_AFFILIATED     | 1.259236874 | 1.101903984 |
| CLEC17A | 3.092544942 | 2.763759048 | 9.46E-05    | 3.092544942 | 2.033172222 | 2.79E-07    | ECM_AFFILIATED     | 1.118963299 | 1.521044262 |
| CLEC18A | 10.44670912 | 4.513542726 | 0           | 10.44670912 | 8.084451389 | 1.02E-14    | ECM_AFFILIATED     | 2.314525364 | 1.292197654 |
| CLEC18B | 10.47349022 | 3.95675984  | 0           | 10.47349022 | 9.261241667 | 2.99E-06    | ECM_AFFILIATED     | 2.646986585 | 1.130894819 |
| CLEC18C | 9.77235539  | 2.916698976 | 0           | 9.77235539  | 7.694377778 | 5.39E-10    | ECM_AFFILIATED     | 3.350484733 | 1.270064412 |
| CLEC1A  | 8.086524212 | 6.162316353 | 1.90E-226   | 8.086524212 | 7.058401389 | 6.94E-16    | ECM_AFFILIATED     | 1.312253988 | 1.145659444 |
| CLEC1B  | 1.946277944 | 1.415200739 | 2.52E-13    | 1.946277944 | 0.589652778 | 7.51E-21    | ECM_AFFILIATED     | 1.375266342 | 3.300718689 |
| CLEC2B  | 8.837280597 | 8.242477576 | 3.99E-19    | 8.837280597 | 6.944370833 | 6.47E-36    | ECM_AFFILIATED     | 1.072163135 | 1.272581895 |
| CLEC2D  | 8.659300829 | 8.181053125 | 1.06E-18    | 8.659300829 | 6.625101389 | 2.96E-33    | ECM_AFFILIATED     | 1.058457963 | 1.307044273 |
| CLEC4A  | 6.794940464 | 6.12701686  | 1.64E-36    | 6.794940464 | 5.136445833 | 1.99E-32    | ECM_AFFILIATED     | 1.109012856 | 1.322887593 |
| CLEC4D  | 2.904792371 | 2.252958499 | 2.53E-17    | 2.904792371 | 2.253077778 | 2.63E-05    | ECM_AFFILIATED     | 1.289323515 | 1.289255258 |
| CLEC4E  | 6.874488723 | 5.286163302 | 7.69E-87    | 6.874488723 | 5.905483333 | 2.01E-09    | ECM_AFFILIATED     | 1.300468474 | 1.164085704 |
| CLEC4F  | 3.911364179 | 3.249367684 | 4.22E-17    | 3.911364179 | 2.705805556 | 2.02E-09    | ECM_AFFILIATED     | 1.203730867 | 1.44554518  |
| CLEC5A  | 6.949000332 | 6.184372762 | 1.07E-16    | 6.949000332 | 4.924469444 | 1.81E-24    | ECM_AFFILIATED     | 1.123638661 | 1.41111655  |
| CLEC7A  | 8.473397015 | 7.752143338 | 2.13E-22    | 8.473397015 | 6.350652778 | 7.90E-32    | ECM_AFFILIATED     | 1.09303926  | 1.33425607  |
| CLEC9A  | 5.180434494 | 3.391493402 | 4.33E-102   | 5.180434494 | 4.116405556 | 1.84E-08    | ECM_AFFILIATED     | 1.527478866 | 1.258484963 |
| COL15A1 | 11.74691277 | 10.45141803 | 1.63E-44    | 11.74691277 | 10.40918194 | 2.00E-15    | COLLAGENS          | 1.123953968 | 1.128514501 |
| COL15A1 | 11.74691277 | 10.45141803 | 1.63E-44    | 11.74691277 | 10.40918194 | 2.00E-15    | BASEMENT_MEMBRANES | 1.123953968 | 1.128514501 |
| COL21A1 | 8.031513433 | 6.099536518 | 9.35E-99    | 8.031513433 | 6.363894444 | 1.04E-13    | COLLAGENS          | 1.316741593 | 1.262043785 |
| COL23A1 | 11.58185871 | 6.192223163 | 0           | 11.58185871 | 6.686234722 | 2.48E-45    | COLLAGENS          | 1.870387808 | 1.732194454 |
| COL27A1 | 10.85414328 | 9.480106408 | 5.67E-78    | 10.85414328 | 9.429201389 | 8.62E-17    | COLLAGENS          | 1.144938972 | 1.151120104 |
| COL4A1  | 15.16350597 | 13.08107084 | 1.00E-151   | 15.16350597 | 13.50309444 | 3.25E-29    | COLLAGENS          | 1.159194546 | 1.12296526  |
| COL4A1  | 15.16350597 | 13.08107084 | 1.00E-151   | 15.16350597 | 13.50309444 | 3.25E-29    | BASEMENT_MEMBRANES | 1.159194546 | 1.12296526  |
| COL4A2  | 15.0285131  | 13.3373902  | 1.26E-106   | 15.0285131  | 13.69891944 | 9.70E-25    | COLLAGENS          | 1.126795638 | 1.097058287 |
| COL4A2  | 15.0285131  | 13.3373902  | 1.26E-106   | 15.0285131  | 13.69891944 | 9.70E-25    | BASEMENT_MEMBRANES | 1.126795638 | 1.097058287 |
| COL5A3  | 9.718981426 | 9.554075074 | 0.025700093 | 9.718981426 | 6.625777778 | 2.61E-47    | COLLAGENS          | 1.017260316 | 1.466843856 |
| COL8A1  | 11.37484776 | 9.731375528 | 1.20E-48    | 11.37484776 | 9.448852778 | 7.39E-24    | COLLAGENS          | 1.168883857 | 1.203833738 |
| CRLF3   | 9.199522056 | 9.065529698 | 0.000262257 | 9.199522056 | 8.397855556 | 4.87E-25    | SECRETED_FACTORS   | 1.014780422 | 1.095460858 |
| CSF1    | 11.19209022 | 10.56072784 | 4.84E-32    | 11.19209022 | 10.33311944 | 1.95E-16    | SECRETED_FACTORS   | 1.059783983 | 1.083127924 |
| CSPG4   | 11.92532305 | 10.2142164  | 1.41E-94    | 11.92532305 | 9.533372222 | 5.18E-36    | ECM_AFFILIATED     | 1.167522068 | 1.25090291  |
| CST7    | 8.298978939 | 6.979783879 | 5.99E-57    | 8.298978939 | 5.5285875   | 2.41E-35    | ECM_REGULATORS     | 1.189002279 | 1.501102938 |
| CTSD    | 15.87999917 | 15.04259047 | 7.74E-87    | 15.87999917 | 15.61078472 | 0.005256144 | ECM_REGULATORS     | 1.055669182 | 1.017245414 |
| CTSL    | 12.90206053 | 11.76380357 | 8.50E-108   | 12.90206053 | 12.70466528 | 0.002378692 | ECM_REGULATORS     | 1.096759263 | 1.015537226 |
| CTSS    | 12.03344925 | 11.4009428  | 2.12E-22    | 12.03344925 | 10.33526667 | 4.05E-29    | ECM_REGULATORS     | 1.055478434 | 1.164309509 |
| CTSW    | 8.191033831 | 6.880932485 | 1.19E-52    | 8.191033831 | 5.523063889 | 4.42E-34    | ECM_REGULATORS     | 1.190395902 | 1.483059765 |
| CTSZ    | 13.28780912 | 12.78600574 | 2.33E-27    | 13.28780912 | 12.23794306 | 1.24E-24    | ECM_REGULATORS     | 1.039246297 | 1.085787788 |
| CX3CL1  | 12.84839668 | 10.45128073 | 1.10E-169   | 12.84839668 | 12.05495    | 2.20E-13    | SECRETED_FACTORS   | 1.229360976 | 1.06581916  |
| CXCL10  | 9.247189552 | 8.42873144  | 3.74E-13    | 9.247189552 | 6.565777778 | 1.25E-28    | SECRETED_FACTORS   | 1.097103356 | 1.4083921   |
| CXCL11  | 7.082460199 | 6.55354109  | 1.95E-06    | 7.082460199 | 4.349088889 | 4.15E-28    | SECRETED_FACTORS   | 1.080707377 | 1.628492859 |

|         |             |             |             |             |             |             |                    |             |             |
|---------|-------------|-------------|-------------|-------------|-------------|-------------|--------------------|-------------|-------------|
| CXCL2   | 7.289367993 | 7.062526151 | 0.035299681 | 7.289367993 | 6.398533333 | 6.57E-05    | SECRETED_FACTORS   | 1.03211908  | 1.139224821 |
| CXCL9   | 10.32818624 | 8.957809945 | 3.15E-28    | 10.32818624 | 7.325129167 | 6.46E-31    | SECRETED_FACTORS   | 1.152981175 | 1.409966432 |
| DDX26B  | 8.471691874 | 8.186677101 | 1.43E-07    | 8.471691874 | 7.020068056 | 1.46E-26    | ECM_GLYCOPROTEINS  | 1.034814464 | 1.206782015 |
| DMP1    | 1.851439303 | 1.433549018 | 2.10E-10    | 1.851439303 | 0.44505     | 1.48E-13    | ECM_GLYCOPROTEINS  | 1.291507496 | 4.160070337 |
| EBI3    | 7.037408292 | 5.996347445 | 1.73E-55    | 7.037408292 | 4.940815278 | 4.92E-34    | SECRETED_FACTORS   | 1.173615831 | 1.42434151  |
| EDIL3   | 11.62819337 | 9.137124229 | 8.40E-156   | 11.62819337 | 10.78246111 | 7.62E-07    | ECM_GLYCOPROTEINS  | 1.272631637 | 1.07843592  |
| EFEMP2  | 11.76636517 | 10.33536263 | 1.48E-118   | 11.76636517 | 10.96328056 | 2.74E-15    | ECM_GLYCOPROTEINS  | 1.138456927 | 1.073252218 |
| EGFL7   | 10.74446617 | 9.72576932  | 4.31E-74    | 10.74446617 | 9.981395833 | 1.11E-07    | SECRETED_FACTORS   | 1.104742033 | 1.076449261 |
| EGFLAM  | 8.492099668 | 7.633638376 | 8.41E-32    | 8.492099668 | 7.380697222 | 2.12E-12    | ECM_GLYCOPROTEINS  | 1.112457684 | 1.150582311 |
| EGLN1   | 12.24558972 | 11.13169949 | 2.26E-283   | 12.24558972 | 11.936975   | 2.88E-07    | ECM_REGULATORS     | 1.100064705 | 1.025853679 |
| EGLN3   | 13.47001874 | 9.356348406 | 0           | 13.47001874 | 9.729830556 | 2.75E-46    | ECM_REGULATORS     | 1.43966622  | 1.384404247 |
| EPO     | 4.640887894 | 1.997428822 | 3.08E-215   | 4.640887894 | 2.528947222 | 5.32E-07    | SECRETED_FACTORS   | 2.323430924 | 1.835106661 |
| ESM1    | 12.42546086 | 7.370375887 | 0           | 12.42546086 | 9.05735     | 5.60E-45    | PROTEOGLYCANS      | 1.685865287 | 1.371864934 |
| F2      | 3.856571144 | 2.012606461 | 2.16E-36    | 3.856571144 | 1.697127778 | 2.81E-08    | ECM_REGULATORS     | 1.916207276 | 2.272410596 |
| FASLG   | 5.689646269 | 4.107513714 | 1.06E-80    | 5.689646269 | 2.872016667 | 1.03E-33    | SECRETED_FACTORS   | 1.385180103 | 1.98106311  |
| FBLN7   | 7.526677944 | 7.268946263 | 0.000416672 | 7.526677944 | 5.9656875   | 1.97E-16    | ECM_GLYCOPROTEINS  | 1.03545654  | 1.26166145  |
| FBN1    | 11.54930315 | 11.18550923 | 4.21E-06    | 11.54930315 | 11.0740375  | 0.000417453 | ECM_GLYCOPROTEINS  | 1.03252368  | 1.042917107 |
| FCN1    | 8.221015257 | 6.275952259 | 2.65E-98    | 8.221015257 | 7.165208333 | 1.11E-10    | ECM_AFFILIATED     | 1.309923167 | 1.147351881 |
| FCN3    | 9.0575733   | 5.495804307 | 0           | 9.0575733   | 7.607698611 | 4.80E-11    | ECM_AFFILIATED     | 1.648088759 | 1.190579933 |
| FGF11   | 9.851438806 | 7.539408404 | 9.17E-139   | 9.851438806 | 7.818938889 | 2.04E-22    | SECRETED_FACTORS   | 1.306659393 | 1.259945748 |
| FGF14   | 6.73802272  | 5.464790762 | 1.24E-34    | 6.73802272  | 6.354980556 | 0.020849244 | SECRETED_FACTORS   | 1.232988236 | 1.060274325 |
| FGF20   | 2.359872968 | 1.855644531 | 4.17E-10    | 2.359872968 | 1.197641667 | 1.32E-12    | SECRETED_FACTORS   | 1.271726847 | 1.970433256 |
| FGG     | 5.71429005  | 3.216749229 | 1.22E-34    | 5.71429005  | 3.605713889 | 5.53E-05    | ECM_GLYCOPROTEINS  | 1.776417632 | 1.584787431 |
| FN1     | 15.47287214 | 15.22713282 | 0.012573832 | 15.47287214 | 13.98961528 | 3.05E-18    | ECM_GLYCOPROTEINS  | 1.016138253 | 1.106025565 |
| GPC6    | 10.87708308 | 8.242906746 | 8.06E-180   | 10.87708308 | 10.22113333 | 3.40E-05    | ECM_AFFILIATED     | 1.319568863 | 1.064175834 |
| HAPLN1  | 8.064862521 | 5.195900929 | 2.95E-119   | 8.064862521 | 4.250297222 | 2.42E-32    | PROTEOGLYCANS      | 1.55215864  | 1.897482011 |
| HAPLN2  | 3.421747595 | 2.633874831 | 7.36E-15    | 3.421747595 | 2.686426389 | 1.16E-05    | PROTEOGLYCANS      | 1.299130678 | 1.273717236 |
| HAPLN4  | 3.954277446 | 3.642159027 | 0.002661679 | 3.954277446 | 1.940705556 | 1.63E-15    | PROTEOGLYCANS      | 1.085695989 | 2.037546311 |
| HMCN1   | 9.900076783 | 8.678227302 | 5.03E-39    | 9.900076783 | 8.940238889 | 3.50E-10    | BASEMENT_MEMBRANES | 1.140794824 | 1.107361549 |
| HMCN1   | 9.900076783 | 8.678227302 | 5.03E-39    | 9.900076783 | 8.940238889 | 3.50E-10    | ECM_GLYCOPROTEINS  | 1.140794824 | 1.107361549 |
| HSPG2   | 14.47044511 | 13.32827609 | 5.85E-76    | 14.47044511 | 13.65412222 | 1.41E-09    | BASEMENT_MEMBRANES | 1.08569518  | 1.059785819 |
| HSPG2   | 14.47044511 | 13.32827609 | 5.85E-76    | 14.47044511 | 13.65412222 | 1.41E-09    | PROTEOGLYCANS      | 1.08569518  | 1.059785819 |
| HTRA1   | 13.02821211 | 11.75354396 | 3.26E-59    | 13.02821211 | 12.34995139 | 4.74E-09    | ECM_REGULATORS     | 1.108449685 | 1.054920112 |
| HTRA4   | 4.143048425 | 3.286020429 | 3.91E-27    | 4.143048425 | 1.068151389 | 5.69E-34    | ECM_REGULATORS     | 1.260810307 | 3.878709018 |
| IGFBP1  | 5.747076285 | 2.801140298 | 2.30E-95    | 5.747076285 | 4.9471875   | 0.033226399 | ECM_GLYCOPROTEINS  | 2.051691695 | 1.161685561 |
| IGFBP3  | 15.67271443 | 12.20539058 | 0           | 15.67271443 | 12.62461111 | 8.80E-41    | ECM_GLYCOPROTEINS  | 1.284081351 | 1.241441363 |
| IGFBP4  | 14.95431907 | 13.33754914 | 1.13E-106   | 14.95431907 | 14.21862361 | 6.57E-12    | ECM_GLYCOPROTEINS  | 1.121219417 | 1.051741679 |
| LAMA4   | 12.18136949 | 10.8735146  | 5.38E-74    | 12.18136949 | 9.671184722 | 8.06E-46    | ECM_GLYCOPROTEINS  | 1.120278947 | 1.259552975 |
| LAMA4   | 12.18136949 | 10.8735146  | 5.38E-74    | 12.18136949 | 9.671184722 | 8.06E-46    | BASEMENT_MEMBRANES | 1.120278947 | 1.259552975 |
| LAMA5   | 12.72284179 | 12.27180755 | 6.43E-14    | 12.72284179 | 12.16372222 | 1.80E-07    | ECM_GLYCOPROTEINS  | 1.036753693 | 1.045966157 |
| LAMA5   | 12.72284179 | 12.27180755 | 6.43E-14    | 12.72284179 | 12.16372222 | 1.80E-07    | BASEMENT_MEMBRANES | 1.036753693 | 1.045966157 |
| LAMB2   | 13.70115771 | 12.62592665 | 1.29E-93    | 13.70115771 | 13.4987125  | 0.00943834  | ECM_GLYCOPROTEINS  | 1.085160566 | 1.014997372 |
| LAMB2   | 13.70115771 | 12.62592665 | 1.29E-93    | 13.70115771 | 13.4987125  | 0.00943834  | BASEMENT_MEMBRANES | 1.085160566 | 1.014997372 |
| LAMC1   | 13.51508557 | 12.74272957 | 2.79E-43    | 13.51508557 | 12.96420139 | 9.38E-11    | BASEMENT_MEMBRANES | 1.060611504 | 1.04249272  |
| LAMC1   | 13.51508557 | 12.74272957 | 2.79E-43    | 13.51508557 | 12.96420139 | 9.38E-11    | ECM_GLYCOPROTEINS  | 1.060611504 | 1.04249272  |
| LGALS12 | 5.359220896 | 2.965744046 | 4.38E-133   | 5.359220896 | 2.600404167 | 2.07E-17    | ECM_AFFILIATED     | 1.807040936 | 2.060918439 |

|          |             |             |             |             |             |             |                    |             |             |
|----------|-------------|-------------|-------------|-------------|-------------|-------------|--------------------|-------------|-------------|
| LGALS2   | 9.935327695 | 4.971912606 | 0           | 9.935327695 | 8.854563889 | 0.000145832 | ECM_AFFILIATED     | 1.998290896 | 1.12205726  |
| LGALS3   | 12.53880862 | 12.37218833 | 0.021097249 | 12.53880862 | 11.71294167 | 2.81E-10    | ECM_AFFILIATED     | 1.013467326 | 1.070508928 |
| LGALS4   | 6.815552239 | 5.61655076  | 1.03E-11    | 6.815552239 | 5.825394444 | 0.007070449 | ECM_AFFILIATED     | 1.213476479 | 1.169972661 |
| LGALS8   | 11.68758109 | 11.27448579 | 6.65E-28    | 11.68758109 | 11.47609028 | 1.00E-05    | ECM_AFFILIATED     | 1.036639836 | 1.018428821 |
| LGI4     | 9.742774793 | 6.763202956 | 8.69E-286   | 9.742774793 | 6.834722222 | 3.86E-22    | ECM_GLYCOPROTEINS  | 1.440556325 | 1.425482189 |
| LOX      | 12.20320498 | 9.413232496 | 1.37E-231   | 12.20320498 | 8.994881944 | 3.08E-29    | ECM_REGULATORS     | 1.296388353 | 1.356683173 |
| LOXL2    | 11.38397828 | 10.14151548 | 3.28E-65    | 11.38397828 | 8.782736111 | 1.02E-36    | ECM_REGULATORS     | 1.122512538 | 1.296176742 |
| MASP1    | 10.01143997 | 6.013994785 | 4.15E-169   | 10.01143997 | 8.433825    | 6.64E-12    | ECM_REGULATORS     | 1.664690497 | 1.187058063 |
| MATN1    | 2.705213101 | 2.397074958 | 3.79E-07    | 2.705213101 | 1.476141667 | 5.54E-16    | ECM_GLYCOPROTEINS  | 1.128547563 | 1.832624309 |
| MMRN1    | 8.317568325 | 6.661839073 | 1.22E-69    | 8.317568325 | 7.528338889 | 0.000756579 | ECM_GLYCOPROTEINS  | 1.248539365 | 1.104834472 |
| MUC12    | 5.264200663 | 4.96823485  | 0.020242154 | 5.264200663 | 2.091136111 | 3.78E-28    | ECM_AFFILIATED     | 1.059571623 | 2.517387862 |
| MUC3A    | 8.593650415 | 6.251572804 | 5.14E-57    | 8.593650415 | 5.777555556 | 1.94E-28    | ECM_AFFILIATED     | 1.374638141 | 1.48741978  |
| NID1     | 12.79713947 | 11.34216783 | 2.77E-115   | 12.79713947 | 11.5376125  | 1.25E-21    | BASEMENT_MEMBRANES | 1.128279854 | 1.109167037 |
| NID1     | 12.79713947 | 11.34216783 | 2.77E-115   | 12.79713947 | 11.5376125  | 1.25E-21    | ECM_GLYCOPROTEINS  | 1.128279854 | 1.109167037 |
| NID2     | 10.62164826 | 9.157650623 | 1.42E-73    | 10.62164826 | 9.872540278 | 2.13E-07    | BASEMENT_MEMBRANES | 1.159866072 | 1.075877936 |
| NID2     | 10.62164826 | 9.157650623 | 1.42E-73    | 10.62164826 | 9.872540278 | 2.13E-07    | ECM_GLYCOPROTEINS  | 1.159866072 | 1.075877936 |
| OIT3     | 5.799255556 | 3.156478009 | 3.52E-163   | 5.799255556 | 4.537640278 | 2.68E-07    | ECM_GLYCOPROTEINS  | 1.837255175 | 1.278033339 |
| OTOG     | 2.711248756 | 1.158646569 | 8.74E-89    | 2.711248756 | 1.556794444 | 5.54E-10    | ECM_GLYCOPROTEINS  | 2.340013624 | 1.741558602 |
| P4HA1    | 12.23105854 | 11.09278501 | 3.21E-168   | 12.23105854 | 10.76867639 | 3.56E-38    | ECM_REGULATORS     | 1.102613864 | 1.135799619 |
| P4HA2    | 11.81924876 | 10.63943168 | 8.32E-85    | 11.81924876 | 10.53157778 | 2.04E-24    | ECM_REGULATORS     | 1.110890986 | 1.122267623 |
| P4HA3    | 7.0343199   | 6.413283868 | 9.44E-15    | 7.0343199   | 4.990619444 | 2.70E-23    | ECM_REGULATORS     | 1.096835887 | 1.409508374 |
| PAMR1    | 8.908585738 | 7.58100814  | 2.36E-54    | 8.908585738 | 8.296740278 | 9.82E-06    | ECM_REGULATORS     | 1.175118873 | 1.073745283 |
| PCSK5    | 9.35573665  | 8.304611201 | 2.44E-48    | 9.35573665  | 8.997338889 | 0.005244554 | ECM_REGULATORS     | 1.126571302 | 1.039833751 |
| PCSK6    | 11.4643592  | 9.095109544 | 1.33E-139   | 11.4643592  | 8.997893056 | 7.37E-24    | ECM_REGULATORS     | 1.2604971   | 1.274115966 |
| PLOD1    | 13.10309718 | 12.50637365 | 4.45E-49    | 13.10309718 | 11.99509861 | 1.14E-23    | ECM_REGULATORS     | 1.047713554 | 1.092370943 |
| PLOD2    | 13.07497297 | 11.00814783 | 1.16E-166   | 13.07497297 | 11.69973472 | 3.32E-22    | ECM_REGULATORS     | 1.187754123 | 1.117544396 |
| PLOD3    | 11.87019652 | 11.66421617 | 3.72E-06    | 11.87019652 | 10.66856667 | 7.19E-38    | ECM_REGULATORS     | 1.017659167 | 1.112632736 |
| PLXDC1   | 10.26218242 | 8.791182675 | 1.08E-141   | 10.26218242 | 7.847458333 | 1.59E-39    | ECM_AFFILIATED     | 1.167326718 | 1.307707793 |
| PLXDC2   | 11.99356633 | 10.79286649 | 3.54E-71    | 11.99356633 | 11.61820278 | 0.00090517  | ECM_AFFILIATED     | 1.111249393 | 1.032308229 |
| PLXNA2   | 11.08723765 | 10.54093009 | 5.96E-24    | 11.08723765 | 10.37407083 | 2.85E-11    | ECM_AFFILIATED     | 1.051827263 | 1.068745127 |
| PLXND1   | 12.88422272 | 11.84135469 | 2.83E-108   | 12.88422272 | 11.50862083 | 4.99E-30    | ECM_AFFILIATED     | 1.088069994 | 1.119527953 |
| PXDN     | 11.85385108 | 11.2128316  | 4.57E-17    | 11.85385108 | 10.31253056 | 1.65E-24    | ECM_GLYCOPROTEINS  | 1.057168386 | 1.149460941 |
| PZP      | 3.459644279 | 2.539882844 | 6.35E-32    | 3.459644279 | 2.898555556 | 2.83E-05    | ECM_REGULATORS     | 1.362127504 | 1.193575287 |
| REG1A    | 7.856792206 | 2.469637468 | 2.10E-205   | 7.856792206 | 5.193655556 | 7.61E-09    | ECM_AFFILIATED     | 3.181354473 | 1.512767283 |
| REG1B    | 2.53455937  | 0.831605184 | 3.28E-60    | 2.53455937  | 0.928422222 | 2.80E-07    | ECM_AFFILIATED     | 3.047791692 | 2.729964136 |
| SEMA3F   | 11.76249718 | 10.55298595 | 2.03E-56    | 11.76249718 | 10.77075694 | 2.59E-19    | ECM_AFFILIATED     | 1.114613176 | 1.092077116 |
| SEMA5B   | 11.68887048 | 6.513178062 | 0           | 11.68887048 | 8.360398611 | 6.67E-41    | ECM_AFFILIATED     | 1.794649305 | 1.398123585 |
| SEMA6A   | 11.54077181 | 9.413355469 | 3.02E-146   | 11.54077181 | 9.825670833 | 3.58E-25    | ECM_AFFILIATED     | 1.225999788 | 1.174553066 |
| SEMA6B   | 9.86630995  | 8.737020281 | 7.56E-76    | 9.86630995  | 8.392631944 | 1.82E-24    | ECM_AFFILIATED     | 1.129253411 | 1.175591878 |
| SEMA6C   | 8.782595854 | 8.339472382 | 6.83E-16    | 8.782595854 | 8.354565278 | 2.86E-05    | ECM_AFFILIATED     | 1.053135672 | 1.051233136 |
| SERPINA1 | 14.95360498 | 11.61734368 | 1.15E-134   | 14.95360498 | 13.89255833 | 3.90E-07    | ECM_REGULATORS     | 1.287179358 | 1.07637518  |
| SERPINB1 | 11.68110746 | 11.54642448 | 0.032431084 | 11.68110746 | 11.03191667 | 3.74E-26    | ECM_REGULATORS     | 1.011664475 | 1.058846601 |
| SERPINB6 | 12.39492355 | 11.84919963 | 4.50E-45    | 12.39492355 | 11.90864444 | 6.72E-22    | ECM_REGULATORS     | 1.046055762 | 1.040834127 |
| SERPINB9 | 10.02796799 | 9.250079476 | 1.57E-44    | 10.02796799 | 8.781790278 | 5.15E-28    | ECM_REGULATORS     | 1.084095333 | 1.141904746 |
| SERPINE1 | 12.42297562 | 10.71683257 | 2.60E-75    | 12.42297562 | 10.64312083 | 6.34E-14    | ECM_REGULATORS     | 1.159202175 | 1.167230535 |
| SERPINE2 | 11.74547363 | 10.61310534 | 3.43E-32    | 11.74547363 | 10.97230556 | 4.54E-06    | ECM_REGULATORS     | 1.106695284 | 1.070465416 |



|                 |             |             |             |             |             |             |                   |             |             |
|-----------------|-------------|-------------|-------------|-------------|-------------|-------------|-------------------|-------------|-------------|
| <b>SERPINE3</b> | 1.463690713 | 1.085625179 | 3.49E-15    | 1.463690713 | 0.815306944 | 6.06E-07    | ECM_REGULATORS    | 1.348246836 | 1.795263395 |
| <b>SERPINF2</b> | 12.10498557 | 7.33069281  | 0           | 12.10498557 | 11.15714306 | 4.23E-05    | ECM_REGULATORS    | 1.651274427 | 1.084953873 |
| <b>SERPING1</b> | 14.13853847 | 12.81372791 | 4.80E-70    | 14.13853847 | 13.73928333 | 0.004964138 | ECM_REGULATORS    | 1.10338994  | 1.029059386 |
| <b>SERPINH1</b> | 12.85610647 | 12.70051871 | 0.00815546  | 12.85610647 | 11.50330972 | 1.10E-32    | ECM_REGULATORS    | 1.012250504 | 1.117600654 |
| <b>SERPINI1</b> | 9.692102819 | 7.887681936 | 9.88E-156   | 9.692102819 | 9.254679167 | 0.000312622 | ECM_REGULATORS    | 1.228764407 | 1.047265134 |
| <b>SNED1</b>    | 9.818390713 | 9.178406915 | 9.54E-23    | 9.818390713 | 9.476165278 | 0.002546701 | ECM_GLYCOPROTEINS | 1.069727111 | 1.036114338 |
| <b>SPARC</b>    | 16.23162471 | 15.12703417 | 2.49E-59    | 16.23162471 | 14.50161667 | 1.67E-36    | ECM_GLYCOPROTEINS | 1.073020959 | 1.119297599 |
| <b>SPARCL1</b>  | 13.80186833 | 12.32108392 | 4.23E-57    | 13.80186833 | 12.48785972 | 2.98E-16    | ECM_GLYCOPROTEINS | 1.120182966 | 1.105222883 |
| <b>SPON2</b>    | 10.63698773 | 10.24074302 | 2.76E-05    | 10.63698773 | 9.052461111 | 3.47E-14    | ECM_GLYCOPROTEINS | 1.038692965 | 1.175038213 |
| <b>SRGN</b>     | 12.06489254 | 10.89604364 | 8.04E-79    | 12.06489254 | 11.43566111 | 4.67E-09    | PROTEOGLYCANS     | 1.10727278  | 1.055023616 |
| <b>SULF1</b>    | 11.57327761 | 11.0555136  | 5.13E-07    | 11.57327761 | 10.50840694 | 6.92E-10    | ECM_REGULATORS    | 1.046833104 | 1.101335119 |
| <b>SULF2</b>    | 12.26121012 | 11.74720074 | 1.64E-13    | 12.26121012 | 11.48369306 | 1.91E-08    | ECM_REGULATORS    | 1.043755903 | 1.067706186 |
| <b>TGFBI</b>    | 13.9308466  | 12.22635787 | 1.67E-91    | 13.9308466  | 11.42486806 | 2.10E-17    | ECM_GLYCOPROTEINS | 1.139410997 | 1.2193442   |
| <b>TGM2</b>     | 13.77264046 | 11.97478609 | 1.83E-117   | 13.77264046 | 12.59867222 | 6.94E-15    | ECM_REGULATORS    | 1.150136659 | 1.093181902 |
| <b>TIMP1</b>    | 13.36011841 | 13.0633727  | 5.15E-05    | 13.36011841 | 11.4754875  | 1.42E-26    | ECM_REGULATORS    | 1.022715857 | 1.16423101  |
| <b>TLL1</b>     | 8.683251575 | 5.422040308 | 2.28E-277   | 8.683251575 | 7.693520833 | 2.50E-08    | ECM_REGULATORS    | 1.601473077 | 1.128644708 |
| <b>TNFAIP6</b>  | 9.24041675  | 6.325536518 | 7.85E-180   | 9.24041675  | 3.766816667 | 1.36E-47    | ECM_GLYCOPROTEINS | 1.460811541 | 2.453110296 |
| <b>TNN</b>      | 5.074218408 | 4.777913081 | 0.001873261 | 5.074218408 | 4.333523611 | 0.000530431 | ECM_GLYCOPROTEINS | 1.062015638 | 1.170922063 |
| <b>VCAN</b>     | 12.8368869  | 11.58204903 | 8.77E-38    | 12.8368869  | 11.09440417 | 2.74E-15    | PROTEOGLYCANS     | 1.10834334  | 1.157059605 |
| <b>WFIKKN1</b>  | 6.173001824 | 4.942840678 | 3.86E-73    | 6.173001824 | 5.469561111 | 0.000335116 | SECRETED_FACTORS  | 1.248877362 | 1.128610084 |
| <b>WNT2B</b>    | 7.899565174 | 7.570306894 | 3.12E-06    | 7.899565174 | 7.193263889 | 0.000178062 | SECRETED_FACTORS  | 1.043493386 | 1.098189264 |
| <b>VWA1</b>     | 12.19261376 | 11.52317063 | 2.82E-29    | 12.19261376 | 11.13334583 | 3.24E-16    | ECM_GLYCOPROTEINS | 1.058095394 | 1.095143719 |
| <b>VWCE</b>     | 7.715001493 | 5.70891516  | 1.59E-112   | 7.715001493 | 5.624819444 | 2.37E-16    | ECM_GLYCOPROTEINS | 1.351395366 | 1.371599848 |
| <b>VWF</b>      | 14.6267602  | 12.07067299 | 0           | 14.6267602  | 11.87630417 | 3.86E-37    | ECM_GLYCOPROTEINS | 1.211760124 | 1.231591916 |
| <b>XCL1</b>     | 4.892048425 | 4.142711434 | 8.00E-19    | 4.892048425 | 3.118611111 | 6.85E-19    | SECRETED_FACTORS  | 1.180880808 | 1.568662539 |
| <b>XCL2</b>     | 4.622433167 | 3.443631978 | 1.40E-51    | 4.622433167 | 2.592145833 | 1.63E-23    | SECRETED_FACTORS  | 1.342313347 | 1.783245799 |
| <b>ZP1</b>      | 2.464280929 | 2.149809407 | 2.13E-05    | 2.464280929 | 0.528861111 | 3.20E-13    | ECM_GLYCOPROTEINS | 1.146278792 | 4.659599424 |

**Kidney Papillary Cell Carcinoma (KIRP)**

| Signature genes | Expression in tumor | Expression in rest of Pan-Cancer | P-value     | Expression in tumor | Expression in normal tissue | P-value     | Matrisome category | Fold change vs. Pan-Cancer | Fold change vs. normal |
|-----------------|---------------------|----------------------------------|-------------|---------------------|-----------------------------|-------------|--------------------|----------------------------|------------------------|
| ADAM10          | 12.59589221         | 12.00752005                      | 3.53E-45    | 12.59589221         | 12.0682375                  | 6.47E-05    | ECM_REGULATORS     | 1.049000307                | 1.043722599            |
| ADAM18          | 0.631162928         | 0.293273311                      | 5.56E-12    | 0.631162928         | 0                           | 0.001473833 | ECM_REGULATORS     | 2.152132175                | Inf                    |
| ADAM28          | 8.671511526         | 7.966519172                      | 3.42E-10    | 8.671511526         | 7.778990625                 | 0.000192492 | ECM_REGULATORS     | 1.088494403                | 1.114734796            |
| ADAMTS10        | 7.990943614         | 7.606247466                      | 7.36E-06    | 7.990943614         | 7.45928125                  | 0.031531271 | ECM_REGULATORS     | 1.050576339                | 1.071275281            |
| ADAMTS13        | 8.100636449         | 7.026120957                      | 1.58E-45    | 8.100636449         | 7.452178125                 | 0.002299593 | ECM_REGULATORS     | 1.152931539                | 1.087015945            |
| ADAMTS3         | 7.629615576         | 5.729295809                      | 1.55E-70    | 7.629615576         | 6.7797625                   | 0.000255731 | ECM_REGULATORS     | 1.331684701                | 1.125351452            |
| ADAMTS9         | 11.19361215         | 8.839440287                      | 4.49E-119   | 11.19361215         | 10.38225                    | 9.90E-07    | ECM_REGULATORS     | 1.266325897                | 1.078148971            |
| ANXA1           | 12.94412586         | 12.60711304                      | 0.005055428 | 12.94412586         | 11.0567875                  | 3.89E-15    | ECM_AFFILIATED     | 1.026731958                | 1.170695001            |
| ANXA13          | 8.637501558         | 3.573841375                      | 1.41E-175   | 8.637501558         | 6.5670375                   | 0.000211675 | ECM_AFFILIATED     | 2.416867637                | 1.31528129             |
| ANXA4           | 13.65363863         | 11.74772896                      | 2.72E-158   | 13.65363863         | 12.71661563                 | 1.87E-10    | ECM_AFFILIATED     | 1.162236435                | 1.073684936            |
| BDNF            | 5.430978816         | 5.149569943                      | 0.018053609 | 5.430978816         | 4.694178125                 | 0.043626365 | SECRETED_FACTORS   | 1.054647063                | 1.156960531            |
| BMP1            | 10.8820514          | 10.65086269                      | 0.00019105  | 10.8820514          | 9.26795                     | 8.69E-16    | ECM_REGULATORS     | 1.021706102                | 1.174159485            |
| C1QTNF3         | 9.394130218         | 7.836027745                      | 6.59E-46    | 9.394130218         | 8.4200125                   | 0.017124323 | ECM_AFFILIATED     | 1.198838305                | 1.115690769            |
| C1QTNF5         | 10.38591028         | 9.229578758                      | 2.29E-35    | 10.38591028         | 9.816803125                 | 0.005306626 | ECM_AFFILIATED     | 1.125285406                | 1.057972758            |
| C1QTNF8         | 0.452791589         | 0.335373638                      | 0.016336358 | 0.452791589         | 0.118353125                 | 0.02004039  | ECM_AFFILIATED     | 1.350110854                | 3.825767919            |
| CCL18           | 7.961552025         | 7.110148818                      | 7.71E-06    | 7.961552025         | 2.835803125                 | 3.83E-13    | SECRETED_FACTORS   | 1.11974478                 | 2.807512255            |
| CCL28           | 8.923380062         | 7.846971484                      | 1.35E-15    | 8.923380062         | 7.83704375                  | 0.005176882 | SECRETED_FACTORS   | 1.137175034                | 1.138615573            |
| CELA1           | 0.900054517         | 0.6377678                        | 3.92E-06    | 0.900054517         | 0.119390625                 | 3.38E-06    | ECM_REGULATORS     | 1.411257385                | 7.538736958            |
| CLCF1           | 9.926199065         | 7.578864274                      | 1.40E-119   | 9.926199065         | 8.69990625                  | 1.94E-09    | SECRETED_FACTORS   | 1.309721181                | 1.140954716            |
| CLEC17A         | 3.426080374         | 2.763759048                      | 6.84E-09    | 3.426080374         | 2.38930625                  | 0.000736231 | ECM_AFFILIATED     | 1.239645105                | 1.43392266             |
| CLEC4E          | 6.376849221         | 5.286163302                      | 1.99E-23    | 6.376849221         | 5.307953125                 | 0.000738535 | ECM_AFFILIATED     | 1.206328457                | 1.201376325            |
| CLEC5A          | 6.545141433         | 6.184372762                      | 0.003972951 | 6.545141433         | 4.384225                    | 1.49E-13    | ECM_AFFILIATED     | 1.058335531                | 1.492884474            |
| COL23A1         | 9.439427726         | 6.192223163                      | 6.59E-139   | 9.439427726         | 7.159628125                 | 5.54E-10    | COLLAGENS          | 1.524400442                | 1.318424304            |
| COL27A1         | 11.32645202         | 9.480106408                      | 5.94E-77    | 11.32645202         | 10.31993438                 | 4.35E-07    | COLLAGENS          | 1.19476001                 | 1.0975314              |
| COLQ            | 6.8583081           | 6.26206762                       | 3.24E-16    | 6.8583081           | 6.102709375                 | 4.87E-05    | ECM_GLYCOPROTEINS  | 1.095214634                | 1.12381365             |
| COLQ            | 6.8583081           | 6.26206762                       | 3.24E-16    | 6.8583081           | 6.102709375                 | 4.87E-05    | BASEMENT_MEMBRANES | 1.095214634                | 1.12381365             |
| CRELD1          | 10.86847944         | 10.22277786                      | 2.38E-36    | 10.86847944         | 10.68195625                 | 0.046787122 | ECM_GLYCOPROTEINS  | 1.063163025                | 1.01746152             |
| CST3            | 13.87110093         | 13.57421519                      | 3.50E-06    | 13.87110093         | 13.13172188                 | 7.83E-08    | ECM_REGULATORS     | 1.021871301                | 1.056304807            |
| CTSA            | 13.79110561         | 12.75228011                      | 4.53E-85    | 13.79110561         | 13.5067625                  | 0.030104231 | ECM_REGULATORS     | 1.081461942                | 1.021051907            |
| CTSB            | 15.5677704          | 15.22879197                      | 3.28E-06    | 15.5677704          | 15.15025938                 | 0.019058605 | ECM_REGULATORS     | 1.02225905                 | 1.027558012            |
| CTSC            | 14.46493894         | 12.03806892                      | 1.54E-172   | 14.46493894         | 13.08364063                 | 2.13E-12    | ECM_REGULATORS     | 1.201599612                | 1.105574462            |
| CTSD            | 16.61061745         | 15.04259047                      | 7.56E-159   | 16.61061745         | 16.03045938                 | 0.001042485 | ECM_REGULATORS     | 1.104239159                | 1.036190982            |
| CTSL            | 13.04041807         | 11.76380357                      | 2.53E-73    | 13.04041807         | 12.75044375                 | 0.02995159  | ECM_REGULATORS     | 1.108520556                | 1.022742292            |
| CTSZ            | 13.5529757          | 12.78600574                      | 8.38E-34    | 13.5529757          | 12.34570938                 | 3.75E-11    | ECM_REGULATORS     | 1.05998511                 | 1.097788332            |
| CX3CL1          | 12.6440215          | 10.45128073                      | 9.06E-79    | 12.6440215          | 12.257825                   | 0.004039731 | SECRETED_FACTORS   | 1.209805938                | 1.031506119            |
| CXCL1           | 8.110678816         | 6.955120429                      | 1.07E-09    | 8.110678816         | 6.52434375                  | 0.000271251 | SECRETED_FACTORS   | 1.166144986                | 1.243140939            |
| CXCL5           | 5.802856386         | 5.078675021                      | 0.000185536 | 5.802856386         | 2.851815625                 | 1.58E-06    | SECRETED_FACTORS   | 1.142592578                | 2.034793672            |
| CXCL6           | 8.086219938         | 4.379255152                      | 1.74E-90    | 8.086219938         | 5.762940625                 | 0.000134894 | SECRETED_FACTORS   | 1.846482942                | 1.403141289            |
| EBI3            | 6.608440187         | 5.996347445                      | 8.49E-12    | 6.608440187         | 5.2003375                   | 2.73E-08    | SECRETED_FACTORS   | 1.102077598                | 1.270771404            |
| EGFL8           | 8.128786916         | 7.67385114                       | 2.91E-09    | 8.128786916         | 7.409                       | 0.010091308 | SECRETED_FACTORS   | 1.059283894                | 1.097150346            |
| EGLN3           | 10.22908037         | 9.356348406                      | 1.87E-12    | 10.22908037         | 9.4548625                   | 0.002235524 | ECM_REGULATORS     | 1.093276985                | 1.081885683            |

|          |             |             |             |             |             |             |                    |             |             |
|----------|-------------|-------------|-------------|-------------|-------------|-------------|--------------------|-------------|-------------|
| ELFN2    | 2.185737072 | 1.091319468 | 1.30E-34    | 2.185737072 | 1.1796125   | 4.48E-05    | ECM_AFFILIATED     | 2.00283889  | 1.852928035 |
| ELSPBP1  | 1.682143302 | 0.400242473 | 1.72E-80    | 1.682143302 | 0.52133125  | 0.003433874 | ECM_GLYCOPROTEINS  | 4.20281059  | 3.226630481 |
| F12      | 7.884756386 | 7.30649261  | 3.45E-05    | 7.884756386 | 5.290778125 | 1.72E-13    | ECM_REGULATORS     | 1.079143826 | 1.490282941 |
| FBLN7    | 8.16224891  | 7.268946263 | 2.95E-19    | 8.16224891  | 6.211996875 | 2.50E-09    | ECM_GLYCOPROTEINS  | 1.122893005 | 1.313949294 |
| FGF17    | 3.428017445 | 3.165921094 | 0.038448031 | 3.428017445 | 2.502115625 | 0.002310742 | SECRETED_FACTORS   | 1.082786761 | 1.370047575 |
| FGF20    | 2.082680685 | 1.855644531 | 0.038811808 | 2.082680685 | 1.110853125 | 0.000159748 | SECRETED_FACTORS   | 1.122348947 | 1.874847933 |
| GPC4     | 12.2659757  | 9.796160452 | 1.76E-86    | 12.2659757  | 11.7863625  | 0.021807793 | ECM_AFFILIATED     | 1.252120743 | 1.040692215 |
| HTRA4    | 4.644349844 | 3.286020429 | 2.83E-36    | 4.644349844 | 1.256496875 | 1.05E-14    | ECM_REGULATORS     | 1.41336609  | 3.69626852  |
| IGFBP6   | 11.63734174 | 8.715188514 | 8.09E-117   | 11.63734174 | 9.177053125 | 4.58E-11    | ECM_GLYCOPROTEINS  | 1.335294323 | 1.268091356 |
| KCP      | 10.93225171 | 5.632865192 | 0           | 10.93225171 | 10.00592813 | 0.000148395 | ECM_GLYCOPROTEINS  | 1.940797683 | 1.092577478 |
| LAMA3    | 10.62209564 | 9.84153712  | 5.36E-07    | 10.62209564 | 8.7836625   | 8.34E-09    | BASEMENT_MEMBRANES | 1.079312663 | 1.209301432 |
| LAMA3    | 10.62209564 | 9.84153712  | 5.36E-07    | 10.62209564 | 8.7836625   | 8.34E-09    | ECM_GLYCOPROTEINS  | 1.079312663 | 1.209301432 |
| LAMA5    | 13.19917819 | 12.27180755 | 1.23E-29    | 13.19917819 | 12.87041563 | 0.018267389 | ECM_GLYCOPROTEINS  | 1.075569197 | 1.025544052 |
| LAMA5    | 13.19917819 | 12.27180755 | 1.23E-29    | 13.19917819 | 12.87041563 | 0.018267389 | BASEMENT_MEMBRANES | 1.075569197 | 1.025544052 |
| LAMB1    | 14.51635919 | 12.08447157 | 4.07E-149   | 14.51635919 | 13.75882188 | 2.87E-05    | ECM_GLYCOPROTEINS  | 1.201240709 | 1.055058298 |
| LAMB1    | 14.51635919 | 12.08447157 | 4.07E-149   | 14.51635919 | 13.75882188 | 2.87E-05    | BASEMENT_MEMBRANES | 1.201240709 | 1.055058298 |
| LAMC1    | 13.20527134 | 12.74272957 | 1.37E-09    | 13.20527134 | 12.56580313 | 3.12E-05    | BASEMENT_MEMBRANES | 1.036298484 | 1.050889562 |
| LAMC1    | 13.20527134 | 12.74272957 | 1.37E-09    | 13.20527134 | 12.56580313 | 3.12E-05    | ECM_GLYCOPROTEINS  | 1.036298484 | 1.050889562 |
| LGALS12  | 4.018092835 | 2.965744046 | 1.95E-16    | 4.018092835 | 2.83313125  | 0.000474026 | ECM_AFFILIATED     | 1.354834663 | 1.418251567 |
| MASP1    | 10.18852461 | 6.013994785 | 2.30E-101   | 10.18852461 | 8.741159375 | 1.65E-05    | ECM_REGULATORS     | 1.694135924 | 1.165580465 |
| MMP15    | 11.68384143 | 10.78826829 | 1.85E-24    | 11.68384143 | 10.88892188 | 0.000396395 | ECM_REGULATORS     | 1.083013615 | 1.073002595 |
| MMP24    | 11.01330125 | 6.583126742 | 6.20E-264   | 11.01330125 | 10.3208875  | 0.002894253 | ECM_REGULATORS     | 1.672959017 | 1.067088586 |
| MMP7     | 13.07205826 | 7.939855923 | 1.91E-109   | 13.07205826 | 11.9315375  | 0.003654131 | ECM_REGULATORS     | 1.646384819 | 1.09558875  |
| MUC12    | 6.546148287 | 4.96823485  | 1.95E-19    | 6.546148287 | 2.312725    | 2.65E-13    | ECM_AFFILIATED     | 1.317600412 | 2.830491427 |
| MUC22    | 1.248452648 | 0.955345006 | 0.002749573 | 1.248452648 | 0.549109375 | 0.005760463 | ECM_AFFILIATED     | 1.306808158 | 2.27359558  |
| MUC3A    | 9.093922741 | 6.251572804 | 2.52E-45    | 9.093922741 | 5.70645625  | 8.46E-13    | ECM_AFFILIATED     | 1.454661575 | 1.593619988 |
| NTN5     | 4.013013084 | 3.722585082 | 0.001091724 | 4.013013084 | 2.834084375 | 3.69E-06    | ECM_GLYCOPROTEINS  | 1.078017828 | 1.41598222  |
| NTN5     | 4.013013084 | 3.722585082 | 0.001091724 | 4.013013084 | 2.834084375 | 3.69E-06    | BASEMENT_MEMBRANES | 1.078017828 | 1.41598222  |
| OGFOD2   | 9.463765421 | 9.056172382 | 2.31E-27    | 9.463765421 | 9.24090625  | 0.020626991 | ECM_REGULATORS     | 1.045007209 | 1.024116593 |
| OTOG     | 3.096923988 | 1.158646569 | 4.64E-75    | 3.096923988 | 1.9328125   | 0.000268218 | ECM_GLYCOPROTEINS  | 2.672880644 | 1.602288886 |
| OVGP1    | 7.822942991 | 6.27086932  | 9.61E-60    | 7.822942991 | 6.4070375   | 4.85E-09    | ECM_AFFILIATED     | 1.247505344 | 1.220992228 |
| P4HTM    | 11.36993333 | 10.26899876 | 1.64E-48    | 11.36993333 | 10.97552813 | 5.70E-05    | ECM_REGULATORS     | 1.107209534 | 1.035934964 |
| PAPLN    | 12.23612492 | 8.998343095 | 2.61E-261   | 12.23612492 | 11.3163125  | 0.000120046 | BASEMENT_MEMBRANES | 1.359819779 | 1.081281992 |
| PAPLN    | 12.23612492 | 8.998343095 | 2.61E-261   | 12.23612492 | 11.3163125  | 0.000120046 | ECM_GLYCOPROTEINS  | 1.359819779 | 1.081281992 |
| PLOD2    | 11.96637072 | 11.00814783 | 1.42E-21    | 11.96637072 | 11.13271563 | 9.01E-07    | ECM_REGULATORS     | 1.087046695 | 1.074883355 |
| PLOD3    | 12.17843053 | 11.66421617 | 2.38E-17    | 12.17843053 | 11.0299875  | 4.35E-17    | ECM_REGULATORS     | 1.044084776 | 1.104120066 |
| PLXDC2   | 12.02954019 | 10.79286649 | 1.23E-41    | 12.02954019 | 11.33408125 | 2.39E-05    | ECM_AFFILIATED     | 1.114582507 | 1.061359975 |
| PXDN     | 12.14663178 | 11.2128316  | 3.33E-19    | 12.14663178 | 10.14875625 | 5.75E-15    | ECM_GLYCOPROTEINS  | 1.083279604 | 1.19685915  |
| REG1B    | 1.742262617 | 0.831605184 | 5.86E-11    | 1.742262617 | 0.757484375 | 0.016708556 | ECM_AFFILIATED     | 2.095059832 | 2.300064099 |
| REG3G    | 4.680821807 | 0.752465266 | 1.29E-247   | 4.680821807 | 3.0763375   | 0.004342932 | ECM_AFFILIATED     | 6.220648338 | 1.521556658 |
| SEMA4F   | 9.016138629 | 8.657883224 | 1.70E-09    | 9.016138629 | 8.58793125  | 0.000704471 | ECM_AFFILIATED     | 1.041379099 | 1.049861529 |
| SEMA6A   | 11.34110685 | 9.413355469 | 3.39E-67    | 11.34110685 | 10.11896563 | 6.81E-09    | ECM_AFFILIATED     | 1.204788972 | 1.120777288 |
| SERPINE2 | 13.28343832 | 10.61310534 | 1.40E-90    | 13.28343832 | 10.9273     | 1.87E-11    | ECM_REGULATORS     | 1.25160713  | 1.215619441 |
| SLPI     | 10.48679595 | 9.820370365 | 0.002815295 | 10.48679595 | 9.2418625   | 0.032658316 | ECM_REGULATORS     | 1.067861553 | 1.134705905 |
| SPON2    | 12.26753707 | 10.24074302 | 8.69E-55    | 12.26753707 | 9.468040625 | 2.06E-12    | ECM_GLYCOPROTEINS  | 1.197914746 | 1.295678542 |
| SPP1     | 17.23932056 | 11.59797863 | 4.07E-242   | 17.23932056 | 15.96070938 | 1.28E-06    | ECM_GLYCOPROTEINS  | 1.486407339 | 1.080109922 |

|                |             |             |             |             |             |             |                   |             |             |
|----------------|-------------|-------------|-------------|-------------|-------------|-------------|-------------------|-------------|-------------|
| <b>SULF2</b>   | 12.89173178 | 11.74720074 | 2.95E-33    | 12.89173178 | 11.66308125 | 5.48E-08    | ECM_REGULATORS    | 1.097430108 | 1.105345277 |
| <b>TGM2</b>    | 12.99723614 | 11.97478609 | 3.57E-22    | 12.99723614 | 12.37251563 | 0.022808045 | ECM_REGULATORS    | 1.085383575 | 1.050492602 |
| <b>THBS3</b>   | 10.28046885 | 9.860752133 | 6.09E-13    | 10.28046885 | 9.2702      | 1.42E-10    | ECM_GLYCOPROTEINS | 1.042564371 | 1.108980264 |
| <b>TIMP1</b>   | 13.27896885 | 13.0633727  | 0.029914409 | 13.27896885 | 11.24769063 | 1.89E-18    | ECM_REGULATORS    | 1.016503866 | 1.180595136 |
| <b>TIMP2</b>   | 13.60509938 | 13.32464488 | 0.000461695 | 13.60509938 | 13.13305938 | 0.006965581 | ECM_REGULATORS    | 1.021047803 | 1.035942882 |
| <b>TINAGL1</b> | 13.33965794 | 10.38895489 | 8.82E-149   | 13.33965794 | 12.59830938 | 8.26E-06    | ECM_GLYCOPROTEINS | 1.284023089 | 1.058845084 |
| <b>TLL2</b>    | 5.640549533 | 4.952078748 | 2.45E-11    | 5.640549533 | 4.697865625 | 0.000619081 | ECM_REGULATORS    | 1.139026623 | 1.200662169 |
| <b>TNFAIP6</b> | 7.853962928 | 6.325536518 | 7.09E-30    | 7.853962928 | 3.591609375 | 2.15E-14    | ECM_GLYCOPROTEINS | 1.241627948 | 2.186753098 |
| <b>VCAN</b>    | 13.02272741 | 11.58204903 | 3.08E-27    | 13.02272741 | 10.35019375 | 4.99E-11    | PROTEOGLYCANS     | 1.124388904 | 1.258210979 |
| <b>WNT2B</b>   | 7.807886916 | 7.570306894 | 0.012792755 | 7.807886916 | 7.264059375 | 0.038082634 | SECRETED_FACTORS  | 1.031383143 | 1.074865514 |
| <b>WNT5A</b>   | 9.663325545 | 9.166653262 | 0.000142986 | 9.663325545 | 8.2600125   | 1.46E-06    | SECRETED_FACTORS  | 1.05418251  | 1.169892363 |
| <b>VWDE</b>    | 4.841403427 | 4.296767061 | 0.000793592 | 4.841403427 | 3.898359375 | 0.035043347 | ECM_GLYCOPROTEINS | 1.12675492  | 1.241907931 |

**Acute Myeloid Leukemia (LAML)**

| Signature genes | Expression in tumor | Expression in rest of Pan-Cancer | P-value     | Expression in tumor | Expression in normal tissue | P-value     | Matrisome category | Fold change vs. Pan-Cancer | Fold change vs. normal |
|-----------------|---------------------|----------------------------------|-------------|---------------------|-----------------------------|-------------|--------------------|----------------------------|------------------------|
| ADAM10          | 12.9438526          | 12.04652004                      | 1.47E-57    | 12.9438526          | 7.340137247                 | 0           | ECM_REGULATORS     | 1.074488944                | 1.763434683            |
| ADAM11          | 6.272948555         | 4.996735932                      | 2.39E-18    | 6.272948555         | 5.243065182                 | 5.57E-161   | ECM_REGULATORS     | 1.255409259                | 1.196427726            |
| ADAM17          | 11.50581503         | 10.18508517                      | 1.01E-52    | 11.50581503         | 3.687994332                 | 2.06E-195   | ECM_REGULATORS     | 1.129672933                | 3.119802796            |
| ADAM20          | 4.248837572         | 1.684467879                      | 2.68E-206   | 4.248837572         | 2.451197976                 | 7.27E-67    | ECM_REGULATORS     | 2.522361884                | 1.733371851            |
| ADAM28          | 11.17229538         | 7.985893853                      | 3.65E-102   | 11.17229538         | 0.117832389                 | 2.43E-31    | ECM_REGULATORS     | 1.399003741                | 94.81514805            |
| ADAM8           | 10.93917803         | 8.844270584                      | 3.33E-54    | 10.93917803         | 2.167739676                 | 1.47E-145   | ECM_REGULATORS     | 1.236866051                | 5.04635227             |
| ADAMTS10        | 8.554260694         | 7.648778621                      | 8.98E-15    | 8.554260694         | 3.57282753                  | 1.39E-112   | ECM_REGULATORS     | 1.11838257                 | 2.394255144            |
| ADAMTS6         | 6.716960694         | 5.754721194                      | 1.65E-12    | 6.716960694         | 0.021462348                 | 3.64E-81    | ECM_REGULATORS     | 1.167208709                | 312.9648554            |
| ADAMTSL4        | 11.09090289         | 8.801570118                      | 5.56E-63    | 11.09090289         | 5.204299595                 | 6.68E-14    | ECM_REGULATORS     | 1.260105043                | 2.131103847            |
| AMH             | 5.666390173         | 4.836136843                      | 7.71E-06    | 5.666390173         | 1.710121457                 | 1.22E-28    | SECRETED_FACTORS   | 1.171676972                | 3.313443118            |
| ANGPT1          | 10.60055145         | 7.076903742                      | 9.05E-114   | 10.60055145         | 1.965484615                 | 3.04E-30    | SECRETED_FACTORS   | 1.497908101                | 5.393352541            |
| ANGPTL3         | 4.175817919         | 2.358567355                      | 9.72E-14    | 4.175817919         | 1.401635628                 | 8.80E-12    | SECRETED_FACTORS   | 1.770489153                | 2.979246415            |
| ANXA1           | 14.14795318         | 12.5695958                       | 1.88E-23    | 14.14795318         | 0.036306883                 | 2.31E-82    | ECM_AFFILIATED     | 1.125569462                | 389.6768924            |
| AREG            | 7.550857225         | 7.014058251                      | 0.030869553 | 7.550857225         | 0.227155061                 | 2.04E-05    | SECRETED_FACTORS   | 1.076531867                | 33.24098174            |
| ARTN            | 6.9857              | 5.485786184                      | 1.70E-19    | 6.9857              | 0.261886235                 | 8.60E-24    | SECRETED_FACTORS   | 1.273418206                | 26.67455968            |
| ASTL            | 2.554580347         | 1.930034691                      | 1.17E-07    | 2.554580347         | 1.904823482                 | 7.94E-47    | ECM_REGULATORS     | 1.323592969                | 1.341111327            |
| BMP8B           | 8.121893064         | 7.790625965                      | 0.011475905 | 8.121893064         | 3.383938057                 | 9.33E-70    | SECRETED_FACTORS   | 1.042521243                | 2.400130537            |
| CCL1            | 2.355576879         | 0.606005333                      | 3.02E-111   | 2.355576879         | 0.705804049                 | 1.36E-208   | SECRETED_FACTORS   | 3.887056354                | 3.337437471            |
| CCL3L3          | 5.933883237         | 5.506648109                      | 0.003870467 | 5.933883237         | 4.902368421                 | 8.72E-05    | SECRETED_FACTORS   | 1.077585333                | 1.210411525            |
| CLEC11A         | 11.83482486         | 8.470163845                      | 1.36E-205   | 11.83482486         | 6.799356275                 | 5.13E-09    | ECM_AFFILIATED     | 1.397236827                | 1.740580193            |
| CLEC12A         | 11.59656416         | 4.993967122                      | 0           | 11.59656416         | 3.961307692                 | 2.69E-53    | ECM_AFFILIATED     | 2.322114639                | 2.927458572            |
| CLEC12B         | 8.040116185         | 1.599652792                      | 0           | 8.040116185         | 1.945121862                 | 2.07E-22    | ECM_AFFILIATED     | 5.026163317                | 4.133476848            |
| CLEC17A         | 5.650477457         | 2.74487387                       | 1.16E-81    | 5.650477457         | 1.722210526                 | 1.03E-06    | ECM_AFFILIATED     | 2.058556321                | 3.280944676            |
| CLEC18A         | 5.865421387         | 4.952130182                      | 8.40E-07    | 5.865421387         | 4.756684211                 | 5.02E-99    | ECM_AFFILIATED     | 1.184423909                | 1.233090348            |
| CLEC2B          | 10.06702486         | 8.191380948                      | 1.46E-53    | 10.06702486         | 6.539072065                 | 3.99E-163   | ECM_AFFILIATED     | 1.228977741                | 1.539518873            |
| CLEC2D          | 10.98961965         | 8.137838094                      | 4.33E-189   | 10.98961965         | 7.754911336                 | 2.19E-157   | ECM_AFFILIATED     | 1.350434787                | 1.417117382            |
| CLEC4A          | 7.171749133         | 6.130756971                      | 4.78E-27    | 7.171749133         | 0.113618219                 | 1.17E-05    | ECM_AFFILIATED     | 1.169798308                | 63.12147136            |
| CLEC4D          | 5.328216763         | 2.227688491                      | 5.67E-112   | 5.328216763         | 0.172690688                 | 7.01E-59    | ECM_AFFILIATED     | 2.391814109                | 30.85410578            |
| CLEC4G          | 4.23326185          | 2.525975005                      | 1.63E-27    | 4.23326185          | 2.918590283                 | 8.42E-06    | ECM_AFFILIATED     | 1.675892217                | 1.450447455            |
| CLEC5A          | 8.68282948          | 6.181991885                      | 7.35E-51    | 8.68282948          | 3.459968016                 | 1.26E-50    | ECM_AFFILIATED     | 1.404535891                | 2.509511487            |
| CLEC7A          | 9.081417341         | 7.747657446                      | 3.71E-23    | 9.081417341         | 9.055188664                 | 1.22E-37    | ECM_AFFILIATED     | 1.172150086                | 1.002896536            |
| COCH            | 8.79724104          | 6.435326401                      | 8.30E-35    | 8.79724104          | 1.409151012                 | 1.31E-10    | ECM_GLYCOPROTEINS  | 1.367023286                | 6.242937034            |
| COL19A1         | 4.549876879         | 2.541607475                      | 2.36E-30    | 4.549876879         | 2.529996761                 | 0.008396548 | COLLAGENS          | 1.790157183                | 1.79837261             |
| COL23A1         | 7.52                | 6.575577972                      | 3.12E-06    | 7.52                | 5.123671255                 | 0.023257637 | COLLAGENS          | 1.143625706                | 1.467697599            |
| COL24A1         | 10.43625665         | 5.245340508                      | 8.28E-261   | 10.43625665         | 5.248983401                 | 1.68E-21    | COLLAGENS          | 1.989624245                | 1.988243408            |
| COLQ            | 7.852090173         | 6.248510287                      | 2.40E-61    | 7.852090173         | 6.721824291                 | 2.20E-15    | ECM_GLYCOPROTEINS  | 1.256633952                | 1.16814868             |
| COLQ            | 7.852090173         | 6.248510287                      | 2.40E-61    | 7.852090173         | 6.721824291                 | 2.20E-15    | BASEMENT_MEMBRANES | 1.256633952                | 1.16814868             |
| CRLF3           | 11.53849075         | 9.005339422                      | 0           | 11.53849075         | 10.00208988                 | 1.47E-183   | SECRETED_FACTORS   | 1.281294376                | 1.153607985            |
| CST7            | 11.15283642         | 6.963638869                      | 6.84E-175   | 11.15283642         | 3.935171255                 | 0.004626887 | ECM_REGULATORS     | 1.601581677                | 2.834142581            |
| CSTA            | 9.417616185         | 7.583918024                      | 4.44E-15    | 9.417616185         | 0.360797571                 | 2.50E-36    | ECM_REGULATORS     | 1.241787709                | 26.10221616            |
| CTSA            | 13.34331792         | 12.80281218                      | 4.70E-14    | 13.34331792         | 0.218745344                 | 1.72E-221   | ECM_REGULATORS     | 1.042217736                | 60.99932308            |
| CTSC            | 12.89961503         | 12.15051554                      | 1.49E-10    | 12.89961503         | 2.008253846                 | 1.29E-256   | ECM_REGULATORS     | 1.061651663                | 6.423299053            |



|         |             |             |             |             |             |             |                    |             |             |
|---------|-------------|-------------|-------------|-------------|-------------|-------------|--------------------|-------------|-------------|
| CTSG    | 11.20455087 | 3.707475567 | 2.35E-303   | 11.20455087 | 10.10622955 | 6.73E-07    | ECM_REGULATORS     | 3.022150966 | 1.108677653 |
| CTSS    | 13.30250173 | 11.38905414 | 7.47E-59    | 13.30250173 | 1.435295142 | 8.42E-259   | ECM_REGULATORS     | 1.168007595 | 9.268129841 |
| CTSW    | 11.61744509 | 6.857769217 | 5.97E-213   | 11.61744509 | 7.856733198 | 1.75E-39    | ECM_REGULATORS     | 1.694056    | 1.478661015 |
| CXCL2   | 7.757123699 | 7.036650853 | 0.000243546 | 7.757123699 | 5.453459919 | 7.18E-11    | SECRETED_FACTORS   | 1.102388602 | 1.422422428 |
| CXCL3   | 6.194993642 | 5.329789034 | 1.94E-05    | 6.194993642 | 0.921595951 | 0.00035187  | SECRETED_FACTORS   | 1.162333744 | 6.722027839 |
| CXCL8   | 9.700831792 | 8.007138705 | 5.05E-15    | 9.700831792 | 5.072441296 | 0.014612053 | SECRETED_FACTORS   | 1.211522886 | 1.912458169 |
| DDX26B  | 11.44502312 | 8.11844362  | 1.16E-262   | 11.44502312 | 4.050267206 | 8.67E-188   | ECM_GLYCOPROTEINS  | 1.409755817 | 2.825745201 |
| ECM2    | 8.428275145 | 8.124389432 | 0.024761478 | 8.428275145 | 2.296951417 | 2.16E-12    | ECM_GLYCOPROTEINS  | 1.037404129 | 3.669331046 |
| EGFL8   | 8.340536416 | 7.64745797  | 2.24E-11    | 8.340536416 | 5.877795547 | 1.22E-50    | SECRETED_FACTORS   | 1.090628605 | 1.418990564 |
| ELANE   | 10.87367861 | 1.630488899 | 0           | 10.87367861 | 6.553738462 | 6.00E-25    | ECM_REGULATORS     | 6.668968199 | 1.659156629 |
| EMID1   | 10.17125607 | 8.120219566 | 7.02E-47    | 10.17125607 | 4.51798502  | 1.33E-95    | ECM_GLYCOPROTEINS  | 1.252583873 | 2.251281495 |
| EMILIN2 | 12.27820751 | 9.281946122 | 1.15E-152   | 12.27820751 | 2.904724696 | 2.12E-66    | ECM_GLYCOPROTEINS  | 1.322805299 | 4.226978044 |
| EPGN    | 5.804923121 | 1.832324753 | 1.29E-97    | 5.804923121 | 1.894318623 | 9.60E-39    | SECRETED_FACTORS   | 3.168064565 | 3.064385816 |
| EREG    | 8.497576301 | 4.250374762 | 3.12E-58    | 8.497576301 | 1.47559919  | 3.84E-56    | SECRETED_FACTORS   | 1.999253425 | 5.758729306 |
| EYS     | 7.171964162 | 4.208640295 | 9.68E-166   | 7.171964162 | 4.568393522 | 3.27E-16    | ECM_GLYCOPROTEINS  | 1.704104808 | 1.56990945  |
| F13A1   | 11.73250925 | 9.187595734 | 7.77E-56    | 11.73250925 | 6.308240486 | 7.65E-06    | ECM_REGULATORS     | 1.276994503 | 1.85987032  |
| FAM20B  | 11.47866358 | 11.29822391 | 0.000205542 | 11.47866358 | 1.862123077 | 1.14E-11    | ECM_REGULATORS     | 1.015970623 | 6.164288347 |
| FCN1    | 11.33375202 | 6.31953918  | 4.57E-202   | 11.33375202 | 2.474690688 | 2.06E-10    | ECM_AFFILIATED     | 1.793445962 | 4.579866113 |
| FGF17   | 5.616921387 | 3.078817093 | 8.03E-52    | 5.616921387 | 1.323577328 | 1.57E-11    | SECRETED_FACTORS   | 1.824376446 | 4.243742522 |
| FNDC7   | 1.784879769 | 0.765987948 | 1.02E-29    | 1.784879769 | 0.012794737 | 1.96E-74    | ECM_GLYCOPROTEINS  | 2.330166907 | 139.5010926 |
| GRIFIN  | 2.493548555 | 0.151489393 | 0           | 2.493548555 | 1.624798381 | 7.27E-76    | ECM_AFFILIATED     | 16.4602188  | 1.534681832 |
| HPSE    | 8.447778613 | 7.768240973 | 9.63E-09    | 8.447778613 | 5.664127126 | 6.99E-25    | ECM_REGULATORS     | 1.087476385 | 1.491452862 |
| HYAL3   | 9.00286185  | 7.078630153 | 4.49E-139   | 9.00286185  | 3.313623482 | 6.34E-257   | ECM_REGULATORS     | 1.271836733 | 2.716923603 |
| IMPG2   | 6.310452601 | 3.81454489  | 9.76E-94    | 6.310452601 | 1.175668421 | 9.90E-122   | PROTEOGLYCANS      | 1.654313367 | 5.367544529 |
| KNG1    | 3.337751445 | 2.198945676 | 0.000122203 | 3.337751445 | 2.913063968 | 9.02E-148   | ECM_REGULATORS     | 1.517887177 | 1.145787213 |
| KY      | 4.549816763 | 3.145937086 | 2.14E-16    | 4.549816763 | 1.514387449 | 1.43E-101   | ECM_REGULATORS     | 1.44625167  | 3.00439413  |
| LGALS12 | 7.602139306 | 3.057418955 | 6.35E-146   | 7.602139306 | 0.560155466 | 3.62E-13    | ECM_AFFILIATED     | 2.486456524 | 13.57148109 |
| LGALS8  | 12.51443121 | 11.27085609 | 1.24E-75    | 12.51443121 | 6.346947368 | 8.52E-198   | ECM_AFFILIATED     | 1.110335463 | 1.971724435 |
| LGALS9  | 12.76034104 | 10.85436987 | 3.43E-65    | 12.76034104 | 5.830256275 | 1.27E-200   | ECM_AFFILIATED     | 1.175594825 | 2.188641534 |
| LGALS9C | 4.491741618 | 3.677051018 | 4.48E-05    | 4.491741618 | 4.138217814 | 2.88E-31    | ECM_AFFILIATED     | 1.221560864 | 1.085428999 |
| LOXL3   | 9.226018497 | 7.824301891 | 9.83E-36    | 9.226018497 | 1.654054656 | 1.07E-258   | ECM_REGULATORS     | 1.179149095 | 5.577819611 |
| MASP2   | 8.973761272 | 4.799598129 | 8.40E-137   | 8.973761272 | 7.579575304 | 5.92E-117   | ECM_REGULATORS     | 1.869690135 | 1.183939853 |
| MFAP3   | 9.452482081 | 8.756427002 | 8.49E-16    | 9.452482081 | 0.008181377 | 5.59E-175   | ECM_GLYCOPROTEINS  | 1.079490765 | 1155.365733 |
| MMP21   | 3.063899422 | 1.247988908 | 4.75E-114   | 3.063899422 | 2.095264777 | 9.07E-132   | ECM_REGULATORS     | 2.455069433 | 1.462297011 |
| MMP25   | 7.784336416 | 6.303884322 | 2.53E-38    | 7.784336416 | 0.021526316 | 5.18E-71    | ECM_REGULATORS     | 1.234847598 | 361.6195401 |
| MMP8    | 6.255147399 | 1.920925771 | 1.25E-139   | 6.255147399 | 2.016360729 | 3.74E-54    | ECM_REGULATORS     | 3.256319163 | 3.102196601 |
| MMRN1   | 10.12605318 | 6.643129145 | 5.34E-90    | 10.12605318 | 7.531660324 | 6.49E-32    | ECM_GLYCOPROTEINS  | 1.524289677 | 1.344464931 |
| MUC19   | 6.412321965 | 1.457422726 | 5.81E-254   | 6.412321965 | 0.566216599 | 6.88E-72    | ECM_AFFILIATED     | 4.399768063 | 11.32485691 |
| MUC6    | 6.790424855 | 4.110726537 | 1.19E-21    | 6.790424855 | 5.225644534 | 0.007986686 | ECM_AFFILIATED     | 1.65187949  | 1.299442549 |
| NGLY1   | 11.53614046 | 9.946942942 | 2.77E-296   | 11.53614046 | 2.755565587 | 0           | ECM_REGULATORS     | 1.159767431 | 4.186487346 |
| NTN3    | 3.513287283 | 2.087444454 | 1.20E-29    | 3.513287283 | 2.342884211 | 3.36E-88    | ECM_GLYCOPROTEINS  | 1.683056656 | 1.499556516 |
| NTN3    | 3.513287283 | 2.087444454 | 1.20E-29    | 3.513287283 | 2.342884211 | 3.36E-88    | BASEMENT_MEMBRANES | 1.683056656 | 1.499556516 |
| NTN5    | 5.130250289 | 3.67578025  | 3.65E-34    | 5.130250289 | 0.968868421 | 5.54E-53    | ECM_GLYCOPROTEINS  | 1.39569015  | 5.295094956 |
| NTN5    | 5.130250289 | 3.67578025  | 3.65E-34    | 5.130250289 | 0.968868421 | 5.54E-53    | BASEMENT_MEMBRANES | 1.39569015  | 5.295094956 |
| NTNG2   | 10.28887746 | 5.874825461 | 6.78E-181   | 10.28887746 | 1.466815789 | 8.87E-14    | BASEMENT_MEMBRANES | 1.751350321 | 7.014430531 |
| NTNG2   | 10.28887746 | 5.874825461 | 6.78E-181   | 10.28887746 | 1.466815789 | 8.87E-14    | ECM_GLYCOPROTEINS  | 1.751350321 | 7.014430531 |

|                  |             |             |             |             |             |             |                   |             |             |
|------------------|-------------|-------------|-------------|-------------|-------------|-------------|-------------------|-------------|-------------|
| <b>OGFOD1</b>    | 10.66913353 | 10.46473275 | 7.98E-08    | 10.66913353 | 1.7273      | 1.33E-45    | ECM_REGULATORS    | 1.019532345 | 6.17676925  |
| <b>OGFOD2</b>    | 9.175483815 | 9.066398041 | 0.032076855 | 9.175483815 | 6.328080162 | 2.18E-38    | ECM_REGULATORS    | 1.012031876 | 1.449963272 |
| <b>OGN</b>       | 7.705776879 | 6.172076895 | 8.59E-10    | 7.705776879 | 1.990348178 | 1.08E-79    | PROTEOGLYCANS     | 1.248490096 | 3.871572302 |
| <b>PLXDC2</b>    | 11.2131815  | 10.891156   | 0.008922507 | 11.2131815  | 0.137824291 | 9.43E-72    | ECM_AFFILIATED    | 1.029567614 | 81.35852817 |
| <b>PLXNC1</b>    | 11.2651474  | 9.636059143 | 2.27E-39    | 11.2651474  | 0.794257085 | 8.42E-122   | ECM_AFFILIATED    | 1.169061671 | 14.18325075 |
| <b>PLXND1</b>    | 13.51380058 | 11.83996109 | 2.03E-82    | 13.51380058 | 2.477731579 | 0.027130201 | ECM_AFFILIATED    | 1.141372043 | 5.454101926 |
| <b>PRG2</b>      | 8.108887861 | 1.85115956  | 0           | 8.108887861 | 1.200249798 | 2.72E-83    | PROTEOGLYCANS     | 4.380437018 | 6.756000191 |
| <b>PRG4</b>      | 5.660745665 | 5.028648119 | 0.008054864 | 5.660745665 | 0.170848178 | 1.44E-106   | PROTEOGLYCANS     | 1.125699299 | 33.13319303 |
| <b>SEMA4A</b>    | 11.21776012 | 9.698539083 | 2.89E-34    | 11.21776012 | 0.775150607 | 6.49E-29    | ECM_AFFILIATED    | 1.156644317 | 14.47171686 |
| <b>SEMA4D</b>    | 12.7009896  | 10.40048786 | 3.09E-161   | 12.7009896  | 2.606353846 | 2.66E-172   | ECM_AFFILIATED    | 1.221191714 | 4.873087211 |
| <b>SERPINB1</b>  | 14.10931734 | 11.50648687 | 1.80E-120   | 14.10931734 | 2.378901619 | 1.41E-116   | ECM_REGULATORS    | 1.226205487 | 5.93102179  |
| <b>SERPINB10</b> | 8.213713295 | 1.092046665 | 0           | 8.213713295 | 5.445735628 | 2.52E-05    | ECM_REGULATORS    | 7.521394058 | 1.508283519 |
| <b>SERPINB2</b>  | 7.440518497 | 3.891332742 | 5.82E-36    | 7.440518497 | 1.472166397 | 4.49E-54    | ECM_REGULATORS    | 1.9120746   | 5.054128741 |
| <b>SERPINB8</b>  | 10.98026127 | 8.745631918 | 1.94E-131   | 10.98026127 | 4.302958704 | 1.25E-57    | ECM_REGULATORS    | 1.255513767 | 2.551793318 |
| <b>SERPINB9</b>  | 9.929163584 | 9.257366473 | 3.95E-11    | 9.929163584 | 0.864357895 | 0           | ECM_REGULATORS    | 1.072568923 | 11.48732908 |
| <b>SERPIND1</b>  | 6.521765318 | 3.246120719 | 5.30E-37    | 6.521765318 | 1.690732794 | 2.50E-90    | ECM_REGULATORS    | 2.009095127 | 3.857360159 |
| <b>SERPINI2</b>  | 6.863645087 | 1.522773366 | 6.42E-242   | 6.863645087 | 5.413568421 | 2.33E-10    | ECM_REGULATORS    | 4.507331976 | 1.267859673 |
| <b>SLIT1</b>     | 6.431248555 | 5.417977274 | 8.68E-06    | 6.431248555 | 5.280717004 | 1.96E-40    | ECM_GLYCOPROTEINS | 1.187020216 | 1.217874116 |
| <b>SRGN</b>      | 15.38833121 | 10.8746825  | 0           | 15.38833121 | 3.283348988 | 9.66E-138   | PROTEOGLYCANS     | 1.415060276 | 4.686779039 |
| <b>SSPO</b>      | 7.86233237  | 5.512489752 | 6.89E-51    | 7.86233237  | 0.724367206 | 2.38E-149   | ECM_GLYCOPROTEINS | 1.426276097 | 10.85407001 |
| <b>THBS3</b>     | 10.0452815  | 9.856948885 | 0.016535824 | 10.0452815  | 4.043587045 | 1.13E-134   | ECM_GLYCOPROTEINS | 1.019106584 | 2.484250096 |
| <b>VCAN</b>      | 12.71811908 | 11.66010408 | 4.16E-09    | 12.71811908 | 0.147120243 | 2.69E-06    | PROTEOGLYCANS     | 1.09073804  | 86.44710492 |
| <b>WFIKKN1</b>   | 6.477812717 | 5.008217452 | 3.35E-32    | 6.477812717 | 0.183051012 | 8.35E-61    | SECRETED_FACTORS  | 1.293436792 | 35.38801911 |
| <b>WNT1</b>      | 1.349380925 | 0.687615969 | 5.05E-19    | 1.349380925 | 0.352096356 | 4.90E-117   | SECRETED_FACTORS  | 1.962404869 | 3.832419452 |
| <b>WNT16</b>     | 4.675616763 | 2.550006147 | 1.14E-47    | 4.675616763 | 2.565715385 | 7.01E-27    | SECRETED_FACTORS  | 1.833570781 | 1.822344283 |
| <b>WNT2B</b>     | 8.933253757 | 7.55502292  | 1.05E-26    | 8.933253757 | 8.476351012 | 3.12E-92    | SECRETED_FACTORS  | 1.182425765 | 1.053903236 |
| <b>VWCE</b>      | 7.879437572 | 5.798354334 | 6.84E-37    | 7.879437572 | 5.376004049 | 7.98E-55    | ECM_GLYCOPROTEINS | 1.35890929  | 1.465668087 |
| <b>XCL2</b>      | 3.796474566 | 3.486271553 | 0.029322267 | 3.796474566 | 0.041340891 | 1.29E-42    | SECRETED_FACTORS  | 1.088978443 | 91.83340038 |
| <b>ZFP91</b>     | 12.38289595 | 11.64241937 | 7.35E-53    | 12.38289595 | 0.60864332  | 2.54E-275   | SECRETED_FACTORS  | 1.063601607 | 20.34507823 |

**Brain Lower Grade Glioma (LGG)**

| Signature genes | Expression in tumor | Expression in rest of Pan-Cancer | P-value     | Expression in tumor | Expression in normal tissue | P-value     | Matrisome category | Fold change vs. Pan-Cancer | Fold change vs. normal |
|-----------------|---------------------|----------------------------------|-------------|---------------------|-----------------------------|-------------|--------------------|----------------------------|------------------------|
| <b>A2M</b>      | 14.2534413          | 14.08456856                      | 0.036741604 | 14.2534413          | 13.3281                     | 0.011803153 | ECM_REGULATORS     | 1.011989912                | 1.069427848            |
| <b>ABI3BP</b>   | 9.620694073         | 8.639476095                      | 1.94E-20    | 9.620694073         | 7.7298                      | 0.009356049 | ECM_GLYCOPROTEINS  | 1.113573782                | 1.244623932            |
| <b>ADAM17</b>   | 10.56405201         | 10.17811342                      | 4.00E-14    | 10.56405201         | 9.79774                     | 0.014642725 | ECM_REGULATORS     | 1.03791848                 | 1.07821314             |
| <b>ADAMTS20</b> | 4.615450669         | 1.601717176                      | 4.98E-191   | 4.615450669         | 1.6891                      | 0.012039795 | ECM_REGULATORS     | 2.881564074                | 2.732491072            |
| <b>ADAMTS6</b>  | 8.155678585         | 5.613373369                      | 3.95E-235   | 8.155678585         | 5.10728                     | 1.88E-09    | ECM_REGULATORS     | 1.4529015                  | 1.596873206            |
| <b>ADAMTS9</b>  | 9.466436902         | 8.96845603                       | 9.01E-10    | 9.466436902         | 8.12938                     | 0.009172046 | ECM_REGULATORS     | 1.05552582                 | 1.164472186            |
| <b>AMH</b>      | 8.026862333         | 4.640634749                      | 2.78E-225   | 8.026862333         | 5.77342                     | 0.005131941 | SECRETED_FACTORS   | 1.729690606                | 1.390313252            |
| <b>ANGPTL2</b>  | 12.54337361         | 10.30002002                      | 1.18E-181   | 12.54337361         | 9.82668                     | 1.16E-06    | SECRETED_FACTORS   | 1.217800896                | 1.276460983            |
| <b>BCAN</b>     | 16.70403002         | 3.738930879                      | 0           | 16.70403002         | 13.6481                     | 1.01E-07    | PROTEOGLYCANS      | 4.467595299                | 1.223908824            |
| <b>BMP2</b>     | 10.59951128         | 7.892823374                      | 3.41E-142   | 10.59951128         | 7.57198                     | 3.06E-05    | SECRETED_FACTORS   | 1.342930252                | 1.399833502            |
| <b>BMP7</b>     | 12.12375296         | 7.749604289                      | 3.28E-154   | 12.12375296         | 11.11576                    | 0.002296236 | SECRETED_FACTORS   | 1.5644351                  | 1.090681426            |
| <b>C1QL1</b>    | 12.17040229         | 5.470629542                      | 0           | 12.17040229         | 9.54586                     | 0.000391298 | ECM_AFFILIATED     | 2.224680396                | 1.274940371            |
| <b>C1QTNF1</b>  | 10.10105048         | 9.803191698                      | 9.68E-05    | 10.10105048         | 8.39614                     | 0.003464395 | ECM_AFFILIATED     | 1.030383858                | 1.203058843            |
| <b>C1QTNF5</b>  | 11.11847897         | 9.224824415                      | 1.74E-151   | 11.11847897         | 8.31122                     | 2.97E-10    | ECM_AFFILIATED     | 1.205278113                | 1.337767376            |
| <b>CLEC4F</b>   | 5.119072658         | 3.191926539                      | 2.01E-119   | 5.119072658         | 1.03112                     | 1.46E-06    | ECM_AFFILIATED     | 1.603756413                | 4.964575081            |
| <b>CRISPLD1</b> | 10.58353767         | 7.920171806                      | 4.92E-156   | 10.58353767         | 8.618                       | 5.46E-05    | ECM_GLYCOPROTEINS  | 1.336276274                | 1.228073528            |
| <b>CSF1</b>     | 11.42384723         | 10.52971149                      | 9.45E-56    | 11.42384723         | 10.41772                    | 0.019917551 | SECRETED_FACTORS   | 1.084915502                | 1.096578448            |
| <b>CTSO</b>     | 11.21049962         | 10.41942741                      | 5.14E-57    | 11.21049962         | 9.74212                     | 5.77E-06    | ECM_REGULATORS     | 1.07592281                 | 1.150724854            |
| <b>EFEMP1</b>   | 11.74695679         | 10.3545701                       | 1.95E-39    | 11.74695679         | 10.28012                    | 0.023888391 | ECM_GLYCOPROTEINS  | 1.134470738                | 1.142686738            |
| <b>EGFL8</b>    | 8.986040918         | 7.577419851                      | 2.23E-121   | 8.986040918         | 8.23844                     | 0.034974029 | SECRETED_FACTORS   | 1.185897191                | 1.090745447            |
| <b>ELN</b>      | 11.06343327         | 9.960839426                      | 2.15E-27    | 11.06343327         | 9.6098                      | 0.002055739 | ECM_GLYCOPROTEINS  | 1.110692864                | 1.151265715            |
| <b>FBN2</b>     | 7.914928107         | 7.156657102                      | 8.43E-11    | 7.914928107         | 5.37108                     | 0.00049353  | ECM_GLYCOPROTEINS  | 1.10595324                 | 1.473619478            |
| <b>FGF11</b>    | 10.48437476         | 7.485597978                      | 1.22E-213   | 10.48437476         | 8.68298                     | 5.34E-06    | SECRETED_FACTORS   | 1.400606176                | 1.207462733            |
| <b>FGF2</b>     | 10.94636119         | 7.605882212                      | 2.72E-305   | 10.94636119         | 10.30794                    | 0.045054253 | SECRETED_FACTORS   | 1.43919678                 | 1.061934895            |
| <b>GPC2</b>     | 9.041081071         | 5.339490218                      | 0           | 9.041081071         | 6.59618                     | 8.94E-07    | ECM_AFFILIATED     | 1.693247989                | 1.370654086            |
| <b>IGFBP1</b>   | 5.188856788         | 2.828676024                      | 1.29E-54    | 5.188856788         | 3.26974                     | 0.020135081 | ECM_GLYCOPROTEINS  | 1.834376487                | 1.586932535            |
| <b>LOXL3</b>    | 9.017237667         | 7.745675268                      | 1.83E-86    | 9.017237667         | 7.88156                     | 0.00470528  | ECM_REGULATORS     | 1.164164176                | 1.144093005            |
| <b>LTBP3</b>    | 13.08680287         | 12.10880309                      | 6.61E-72    | 13.08680287         | 12.31454                    | 0.004088892 | ECM_GLYCOPROTEINS  | 1.080767667                | 1.062711467            |
| <b>MASP1</b>    | 11.94411759         | 6.007358593                      | 0           | 11.94411759         | 8.93504                     | 6.86E-08    | ECM_REGULATORS     | 1.988247814                | 1.336772705            |
| <b>MATN2</b>    | 11.53295315         | 10.21987741                      | 1.24E-58    | 11.53295315         | 10.16568                    | 0.008627595 | ECM_GLYCOPROTEINS  | 1.128482534                | 1.134498937            |
| <b>MATN3</b>    | 7.377682792         | 6.422352037                      | 1.27E-21    | 7.377682792         | 6.55734                     | 0.03658978  | ECM_GLYCOPROTEINS  | 1.148750917                | 1.125102983            |
| <b>MEP1A</b>    | 3.418512046         | 2.593111222                      | 2.68E-10    | 3.418512046         | 1.95394                     | 0.033023487 | ECM_REGULATORS     | 1.318305214                | 1.749548116            |
| <b>MFAP1</b>    | 10.52323289         | 10.36659452                      | 5.42E-12    | 10.52323289         | 10.24414                    | 0.030378151 | ECM_GLYCOPROTEINS  | 1.015109916                | 1.02724415             |
| <b>MMP16</b>    | 11.47538623         | 6.534650148                      | 0           | 11.47538623         | 10.08548                    | 0.004060414 | ECM_REGULATORS     | 1.756082724                | 1.137812601            |
| <b>NTN1</b>     | 11.71538489         | 8.219197304                      | 4.68E-251   | 11.71538489         | 9.07214                     | 1.26E-09    | BASEMENT_MEMBRANES | 1.425368495                | 1.291358477            |
| <b>NTN1</b>     | 11.71538489         | 8.219197304                      | 4.68E-251   | 11.71538489         | 9.07214                     | 1.26E-09    | ECM_GLYCOPROTEINS  | 1.425368495                | 1.291358477            |
| <b>PLXNA3</b>   | 10.94491185         | 10.71939606                      | 4.70E-06    | 10.94491185         | 10.17876                    | 0.004209866 | ECM_AFFILIATED     | 1.021038107                | 1.075269665            |
| <b>PODN</b>     | 9.46768738          | 8.912276391                      | 4.21E-08    | 9.46768738          | 7.98692                     | 0.008747869 | PROTEOGLYCANS      | 1.062319767                | 1.18539905             |
| <b>SEMA5A</b>   | 12.04332581         | 9.578621883                      | 1.04E-168   | 12.04332581         | 10.95534                    | 0.033454814 | ECM_AFFILIATED     | 1.257313                   | 1.099311004            |
| <b>SEMA6A</b>   | 12.28387591         | 9.411305514                      | 1.42E-238   | 12.28387591         | 11.59464                    | 0.031211903 | ECM_AFFILIATED     | 1.305225496                | 1.059444356            |
| <b>SMOC1</b>    | 13.92400956         | 6.587153773                      | 0           | 13.92400956         | 11.10822                    | 0.000628423 | ECM_GLYCOPROTEINS  | 2.113812739                | 1.253487018            |
| <b>SPARC</b>    | 16.99384723         | 15.03396626                      | 1.57E-166   | 16.99384723         | 13.82872                    | 1.57E-09    | ECM_GLYCOPROTEINS  | 1.130363534                | 1.228880708            |

|              |             |             |             |             |          |             |                   |             |             |
|--------------|-------------|-------------|-------------|-------------|----------|-------------|-------------------|-------------|-------------|
| <b>SRPX</b>  | 10.39182428 | 8.003414041 | 9.14E-126   | 10.39182428 | 8.07598  | 0.000191407 | ECM_GLYCOPROTEINS | 1.298423926 | 1.28675706  |
| <b>SULF2</b> | 13.31131549 | 11.71489504 | 4.48E-103   | 13.31131549 | 11.30822 | 1.79E-05    | ECM_REGULATORS    | 1.136272706 | 1.177136233 |
| <b>TGM5</b>  | 3.389331358 | 2.902514786 | 3.69E-05    | 3.389331358 | 1.55432  | 0.018243093 | ECM_REGULATORS    | 1.16772234  | 2.180587883 |
| <b>TIMP3</b> | 14.11998967 | 13.16736585 | 1.83E-30    | 14.11998967 | 12.42296 | 1.52E-05    | ECM_REGULATORS    | 1.072347334 | 1.136604294 |
| <b>TIMP4</b> | 11.13904493 | 4.989430644 | 0           | 11.13904493 | 7.32874  | 8.34E-09    | ECM_REGULATORS    | 2.232528264 | 1.519912691 |
| <b>TNC</b>   | 12.42727763 | 11.78978764 | 2.39E-09    | 12.42727763 | 10.10318 | 0.000689646 | ECM_GLYCOPROTEINS | 1.054071371 | 1.230036249 |
| <b>VCAN</b>  | 13.69108642 | 11.54805434 | 9.45E-93    | 13.69108642 | 11.1978  | 1.27E-07    | PROTEOGLYCANS     | 1.185575164 | 1.222658596 |
| <b>WNT5A</b> | 9.341081644 | 9.054258664 | 0.005387261 | 9.341081644 | 8.03454  | 0.012285011 | SECRETED_FACTORS  | 1.03167824  | 1.162615613 |
| <b>VWCE</b>  | 8.119607839 | 5.683643368 | 4.77E-145   | 8.119607839 | 6.86424  | 0.006739663 | ECM_GLYCOPROTEINS | 1.428592069 | 1.18288519  |

**Liver Hepatocellular Carcinoma (LIHC)**

| Signature genes | Expression in tumor | Expression in rest of Pan-Cancer | P-value     | Expression in tumor | Expression in normal tissue | P-value     | Matrisome category | Fold change vs. Pan-Cancer | Fold change vs. normal |
|-----------------|---------------------|----------------------------------|-------------|---------------------|-----------------------------|-------------|--------------------|----------------------------|------------------------|
| <b>ADAMTS10</b> | 8.142894299         | 7.635274144                      | 1.91E-11    | 8.142894299         | 7.486658                    | 0.00195358  | ECM_REGULATORS     | 1.066483553                | 1.087654104            |
| <b>AMBN</b>     | 0.853220428         | 0.3279475                        | 2.72E-26    | 0.853220428         | 0                           | 0.000890941 | ECM_GLYCOPROTEINS  | 2.60169822                 | Inf                    |
| <b>C17orf58</b> | 9.232926603         | 8.744455833                      | 4.14E-28    | 9.232926603         | 8.561548                    | 1.33E-10    | ECM_REGULATORS     | 1.055860625                | 1.078417899            |
| <b>CBLN1</b>    | 5.568139905         | 3.936572458                      | 5.82E-34    | 5.568139905         | 4.419758                    | 0.000348208 | SECRETED_FACTORS   | 1.41446397                 | 1.259829137            |
| <b>CCL15</b>    | 9.854640143         | 2.415644656                      | 0           | 9.854640143         | 9.202952                    | 0.00882769  | SECRETED_FACTORS   | 4.079507355                | 1.070812946            |
| <b>CCL20</b>    | 8.750070546         | 5.85601887                       | 1.96E-66    | 8.750070546         | 7.15508                     | 0.000230199 | SECRETED_FACTORS   | 1.494201221                | 1.222917221            |
| <b>CCL25</b>    | 4.60824228          | 2.165042421                      | 1.35E-81    | 4.60824228          | 2.379118                    | 1.82E-06    | SECRETED_FACTORS   | 2.128476669                | 1.936954065            |
| <b>CELA3A</b>   | 0.91937981          | 0.528904151                      | 1.97E-05    | 0.91937981          | 0.072372                    | 0.000561595 | ECM_REGULATORS     | 1.738273008                | 12.70352913            |
| <b>CLEC14A</b>  | 9.376042518         | 9.003399132                      | 2.86E-07    | 9.376042518         | 9.030356                    | 0.014919114 | ECM_AFFILIATED     | 1.041389189                | 1.038280497            |
| <b>COL27A1</b>  | 10.84546865         | 9.541330536                      | 1.89E-49    | 10.84546865         | 10.50045                    | 0.018941356 | COLLAGENS          | 1.136683045                | 1.03285751             |
| <b>COL5A3</b>   | 10.38562732         | 9.412519309                      | 3.19E-26    | 10.38562732         | 9.283058                    | 2.24E-05    | COLLAGENS          | 1.103384437                | 1.11877221             |
| <b>CRELD1</b>   | 10.71393492         | 10.2293722                       | 3.59E-28    | 10.71393492         | 10.300148                   | 6.21E-07    | ECM_GLYCOPROTEINS  | 1.047369742                | 1.04017291             |
| <b>CRELD2</b>   | 10.99834703         | 10.3681307                       | 6.53E-53    | 10.99834703         | 10.296032                   | 3.70E-09    | ECM_GLYCOPROTEINS  | 1.060783988                | 1.068212204            |
| <b>CSTL1</b>    | 0.699043705         | 0.580929847                      | 0.016614064 | 0.699043705         | 0.374988                    | 0.044393987 | ECM_REGULATORS     | 1.203318626                | 1.864176202            |
| <b>CTSA</b>     | 13.69355297         | 12.77392136                      | 4.06E-88    | 13.69355297         | 12.823326                   | 1.07E-14    | ECM_REGULATORS     | 1.071992898                | 1.067862813            |
| <b>EGLN1</b>    | 11.94505012         | 11.17259565                      | 7.09E-97    | 11.94505012         | 11.758498                   | 0.03237828  | ECM_REGULATORS     | 1.069138318                | 1.015865302            |
| <b>EGLN2</b>    | 11.68868717         | 11.41882167                      | 3.43E-16    | 11.68868717         | 11.209264                   | 1.96E-07    | ECM_REGULATORS     | 1.023633393                | 1.042770263            |
| <b>FBLN7</b>    | 8.720601425         | 7.233815028                      | 6.72E-66    | 8.720601425         | 8.106112                    | 0.000731723 | ECM_GLYCOPROTEINS  | 1.205532819                | 1.075805691            |
| <b>GPC3</b>     | 12.46773349         | 7.863516386                      | 1.36E-237   | 12.46773349         | 8.105304                    | 7.88E-18    | ECM_AFFILIATED     | 1.585516311                | 1.538219108            |
| <b>LGALS8</b>   | 11.78049335         | 11.269759                        | 5.34E-31    | 11.78049335         | 11.555006                   | 0.023552646 | ECM_AFFILIATED     | 1.045319013                | 1.019514256            |
| <b>MEP1A</b>    | 4.136321378         | 2.571939098                      | 1.57E-27    | 4.136321378         | 1.647292                    | 1.00E-06    | ECM_REGULATORS     | 1.608250126                | 2.510982496            |
| <b>MUC13</b>    | 8.896255582         | 4.625577288                      | 6.70E-82    | 8.896255582         | 5.724394                    | 1.93E-08    | ECM_AFFILIATED     | 1.923274659                | 1.554095609            |
| <b>OGFOD2</b>   | 9.753190261         | 9.036881988                      | 8.12E-107   | 9.753190261         | 9.440706                    | 0.000163832 | ECM_REGULATORS     | 1.07926498                 | 1.033099671            |
| <b>PLOD1</b>    | 13.20997387         | 12.49407436                      | 4.49E-50    | 13.20997387         | 12.938524                   | 0.010653468 | ECM_REGULATORS     | 1.057299123                | 1.020979972            |
| <b>PLOD3</b>    | 12.29088551         | 11.66115053                      | 1.89E-33    | 12.29088551         | 11.326502                   | 2.45E-19    | ECM_REGULATORS     | 1.054002817                | 1.085143984            |
| <b>REG1A</b>    | 3.881072922         | 2.828283195                      | 8.92E-07    | 3.881072922         | 1.105046                    | 7.88E-06    | ECM_AFFILIATED     | 1.372236319                | 3.51213698             |
| <b>REG3A</b>    | 4.71291924          | 1.146505079                      | 3.31E-112   | 4.71291924          | 1.272898                    | 5.19E-06    | ECM_AFFILIATED     | 4.110683262                | 3.702511309            |
| <b>SEMA6C</b>   | 9.14252114          | 8.341219629                      | 2.00E-35    | 9.14252114          | 7.947982                    | 3.09E-11    | ECM_AFFILIATED     | 1.096065269                | 1.150294646            |
| <b>SPON2</b>    | 12.61736295         | 10.21770282                      | 1.10E-101   | 12.61736295         | 11.768112                   | 4.41E-07    | ECM_GLYCOPROTEINS  | 1.234853192                | 1.072165437            |
| <b>TGM3</b>     | 6.971352257         | 3.865587137                      | 4.23E-86    | 6.971352257         | 3.389808                    | 4.32E-14    | ECM_REGULATORS     | 1.803439428                | 2.056562571            |
| <b>TINAG</b>    | 3.103591924         | 1.888654027                      | 2.28E-13    | 3.103591924         | 0.508714                    | 8.02E-07    | ECM_GLYCOPROTEINS  | 1.643282401                | 6.100858093            |
| <b>TMPRSS15</b> | 1.453154394         | 0.984701297                      | 7.30E-08    | 1.453154394         | 0.074748                    | 0.000410202 | ECM_REGULATORS     | 1.475731167                | 19.44071272            |
| <b>TSPEAR</b>   | 3.505656295         | 2.613054575                      | 3.86E-17    | 3.505656295         | 2.752282                    | 0.004042314 | ECM_GLYCOPROTEINS  | 1.341593217                | 1.273727145            |
| <b>VWA7</b>     | 6.914300713         | 6.571677298                      | 0.000144315 | 6.914300713         | 6.32681                     | 0.002140942 | ECM_GLYCOPROTEINS  | 1.052136372                | 1.092857335            |

Lung Adenocarcinoma (LUAD)

| Signature genes | Expression in tumor | Expression in rest of Pan-Cancer | P-value     | Expression in tumor | Expression in normal tissue | P-value     | Matrisome category | Fold change vs. Pan-Cancer | Fold change vs. normal |
|-----------------|---------------------|----------------------------------|-------------|---------------------|-----------------------------|-------------|--------------------|----------------------------|------------------------|
| ADAM12          | 8.848474042         | 8.348884303                      | 6.73E-06    | 8.848474042         | 6.561020339                 | 5.45E-19    | ECM_REGULATORS     | 1.059839102                | 1.348642983            |
| ADAM15          | 12.71221254         | 12.12676564                      | 9.63E-44    | 12.71221254         | 11.90235424                 | 3.47E-14    | ECM_REGULATORS     | 1.048277251                | 1.068041859            |
| ADAM19          | 9.638549652         | 8.974371885                      | 3.75E-21    | 9.638549652         | 9.040608475                 | 5.89E-05    | ECM_REGULATORS     | 1.074008273                | 1.066139484            |
| ADAM2           | 0.721807666         | 0.558411265                      | 0.01336353  | 0.721807666         | 0.058111864                 | 0.000674348 | ECM_REGULATORS     | 1.292609427                | 12.4210034             |
| ADAM28          | 9.412993728         | 7.91717527                       | 4.35E-70    | 9.412993728         | 7.675532203                 | 5.25E-19    | ECM_REGULATORS     | 1.188933352                | 1.226363655            |
| ADAM8           | 10.54010592         | 8.731807571                      | 4.33E-126   | 10.54010592         | 8.872135593                 | 3.07E-20    | ECM_REGULATORS     | 1.207093244                | 1.188000996            |
| ADAM9           | 12.65690906         | 11.71973271                      | 5.64E-65    | 12.65690906         | 12.35555424                 | 0.023919962 | ECM_REGULATORS     | 1.079965676                | 1.024390231            |
| ADAMDEC1        | 7.424546864         | 5.936989589                      | 3.77E-36    | 7.424546864         | 5.417447458                 | 5.00E-12    | ECM_REGULATORS     | 1.250557501                | 1.370488025            |
| ADAMTS12        | 9.264763763         | 7.851592077                      | 1.04E-44    | 9.264763763         | 7.958935593                 | 1.02E-11    | ECM_REGULATORS     | 1.179985368                | 1.164070704            |
| ADAMTS14        | 7.163511672         | 6.635430198                      | 7.08E-09    | 7.163511672         | 4.933784746                 | 1.32E-25    | ECM_REGULATORS     | 1.079585115                | 1.451930322            |
| ADAMTS16        | 6.612009059         | 5.034281014                      | 8.16E-44    | 6.612009059         | 4.162805085                 | 3.47E-18    | ECM_REGULATORS     | 1.313396896                | 1.588354229            |
| ADAMTS2         | 9.8477777           | 9.441430027                      | 5.87E-06    | 9.8477777           | 9.341244068                 | 0.002237282 | ECM_REGULATORS     | 1.043038785                | 1.0542255              |
| ADAMTSL5        | 6.40815122          | 6.177318889                      | 0.008268301 | 6.40815122          | 5.471638983                 | 4.99E-06    | ECM_REGULATORS     | 1.037367721                | 1.171157534            |
| AGRN            | 13.64358275         | 13.26079766                      | 1.12E-11    | 13.64358275         | 13.23345085                 | 0.005757839 | BASEMENT_MEMBRANES | 1.028865917                | 1.03099206             |
| AGRN            | 13.64358275         | 13.26079766                      | 1.12E-11    | 13.64358275         | 13.23345085                 | 0.005757839 | ECM_GLYCOPROTEINS  | 1.028865917                | 1.03099206             |
| ANGPTL4         | 9.622597213         | 9.294404527                      | 0.001747439 | 9.622597213         | 8.419622034                 | 7.09E-06    | SECRETED_FACTORS   | 1.035310781                | 1.142877575            |
| ANXA10          | 2.794986237         | 2.250012568                      | 0.000233315 | 2.794986237         | 0.802064407                 | 6.88E-07    | ECM_AFFILIATED     | 1.242209167                | 3.484740394            |
| ASPN            | 9.445250871         | 8.283267336                      | 1.33E-26    | 9.445250871         | 9.046740678                 | 0.045178635 | PROTEOGLYCANS      | 1.14028082                 | 1.04405014             |
| BGN             | 14.02716411         | 13.14403239                      | 2.40E-24    | 14.02716411         | 13.68819153                 | 0.015882831 | PROTEOGLYCANS      | 1.067188797                | 1.024763869            |
| BMP8A           | 4.402228049         | 4.233057469                      | 0.03982155  | 4.402228049         | 2.359913559                 | 4.19E-20    | SECRETED_FACTORS   | 1.039964158                | 1.865419194            |
| BMP8B           | 7.97126446          | 7.785403332                      | 0.012707897 | 7.97126446          | 6.983752542                 | 2.30E-11    | SECRETED_FACTORS   | 1.023873025                | 1.141401333            |
| C1QL2           | 2.574679617         | 1.56304504                       | 1.32E-23    | 2.574679617         | 1.275869492                 | 0.000567784 | ECM_AFFILIATED     | 1.647220362                | 2.017980392            |
| C1QTNF6         | 9.506119512         | 9.358422232                      | 0.013501192 | 9.506119512         | 7.607322034                 | 2.29E-26    | ECM_AFFILIATED     | 1.015782284                | 1.249601301            |
| CBLN3           | 7.112201045         | 6.731921741                      | 1.72E-12    | 7.112201045         | 6.722327119                 | 0.000879314 | SECRETED_FACTORS   | 1.056488967                | 1.057996869            |
| CCL1            | 1.206354704         | 0.585415387                      | 2.29E-45    | 1.206354704         | 0.541835593                 | 9.67E-05    | SECRETED_FACTORS   | 2.060681578                | 2.226422035            |
| CCL19           | 8.519009756         | 6.00968536                       | 3.90E-75    | 8.519009756         | 7.427488136                 | 7.92E-05    | SECRETED_FACTORS   | 1.417546718                | 1.146957033            |
| CCL20           | 8.601482578         | 5.6792485                        | 8.52E-91    | 8.601482578         | 7.528376271                 | 0.000426218 | SECRETED_FACTORS   | 1.514545908                | 1.142541535            |
| CCL22           | 8.14944007          | 5.80571685                       | 3.20E-119   | 8.14944007          | 7.683220339                 | 0.025103088 | SECRETED_FACTORS   | 1.403692305                | 1.06068025             |
| CCL26           | 3.287485889         | 2.992511927                      | 0.000326706 | 3.287485889         | 2.41969661                  | 0.000112071 | SECRETED_FACTORS   | 1.098570689                | 1.358635572            |
| CCL7            | 3.910518467         | 2.122847421                      | 6.23E-93    | 3.910518467         | 2.284505085                 | 5.86E-09    | SECRETED_FACTORS   | 1.842110002                | 1.711757392            |
| CHAD            | 5.165752091         | 4.90545464                       | 0.019617279 | 5.165752091         | 4.662118644                 | 0.049298488 | PROTEOGLYCANS      | 1.05306286                 | 1.108026733            |
| CHRD            | 8.006191115         | 7.648675334                      | 4.13E-05    | 8.006191115         | 7.406262712                 | 0.003901321 | SECRETED_FACTORS   | 1.046742183                | 1.081002852            |
| CHRDL2          | 5.85492108          | 4.721666086                      | 1.36E-19    | 5.85492108          | 5.017574576                 | 0.00065872  | SECRETED_FACTORS   | 1.240011677                | 1.166882722            |
| CILP            | 8.026508537         | 6.874250443                      | 4.75E-18    | 8.026508537         | 6.427998305                 | 4.28E-08    | ECM_GLYCOPROTEINS  | 1.167619452                | 1.248679318            |
| CILP2           | 7.548761847         | 6.195282958                      | 6.08E-35    | 7.548761847         | 4.452372881                 | 3.73E-27    | ECM_GLYCOPROTEINS  | 1.218469261                | 1.695446911            |
| CLCF1           | 8.780628746         | 7.644861121                      | 1.19E-48    | 8.780628746         | 7.854884746                 | 9.94E-08    | SECRETED_FACTORS   | 1.148566155                | 1.117855835            |
| CLEC17A         | 3.594714111         | 2.697537608                      | 1.65E-25    | 3.594714111         | 2.689708475                 | 7.82E-05    | ECM_AFFILIATED     | 1.332590916                | 1.336469787            |
| CLEC2D          | 8.674361498         | 8.138486802                      | 1.56E-21    | 8.674361498         | 8.176230508                 | 0.000419804 | ECM_AFFILIATED     | 1.065844513                | 1.060924284            |
| COCH            | 7.039310627         | 6.334502499                      | 3.49E-11    | 7.039310627         | 4.6993                      | 3.97E-15    | ECM_GLYCOPROTEINS  | 1.111264954                | 1.497948764            |
| COL10A1         | 9.639965331         | 6.53605465                       | 6.25E-86    | 9.639965331         | 5.402659322                 | 4.07E-37    | COLLAGENS          | 1.474890564                | 1.784300056            |
| COL11A1         | 8.63662892          | 7.216588393                      | 6.26E-18    | 8.63662892          | 3.937052542                 | 3.25E-26    | COLLAGENS          | 1.196774494                | 2.193678857            |
| COL17A1         | 8.589133275         | 7.609714255                      | 3.79E-08    | 8.589133275         | 5.95710339                  | 6.13E-12    | COLLAGENS          | 1.128706412                | 1.441830486            |



|         |             |             |             |             |             |             |                    |             |             |
|---------|-------------|-------------|-------------|-------------|-------------|-------------|--------------------|-------------|-------------|
| COL1A1  | 15.6819561  | 14.60099167 | 4.03E-16    | 15.6819561  | 13.11496102 | 6.72E-25    | COLLAGENS          | 1.074033631 | 1.195730287 |
| COL1A2  | 15.33991185 | 14.3746144  | 4.94E-17    | 15.33991185 | 14.19507627 | 8.07E-10    | COLLAGENS          | 1.067152928 | 1.080650188 |
| COL24A1 | 6.400852091 | 5.194934608 | 1.22E-43    | 6.400852091 | 4.852837288 | 8.09E-20    | COLLAGENS          | 1.232133333 | 1.318991697 |
| COL28A1 | 6.814599826 | 5.440382605 | 8.64E-42    | 6.814599826 | 6.16759322  | 0.014323458 | COLLAGENS          | 1.252595694 | 1.104904228 |
| COL3A1  | 15.35310087 | 14.10683089 | 9.19E-23    | 15.35310087 | 13.16751695 | 1.27E-21    | COLLAGENS          | 1.088345142 | 1.165982997 |
| COL5A1  | 12.73341794 | 11.68922889 | 3.43E-23    | 12.73341794 | 11.09924068 | 2.45E-15    | COLLAGENS          | 1.089329164 | 1.147233249 |
| COL5A2  | 12.07339077 | 11.40793507 | 3.70E-12    | 12.07339077 | 10.38746949 | 1.56E-16    | COLLAGENS          | 1.058332704 | 1.162303367 |
| COL6A3  | 14.10555906 | 12.4519153  | 1.42E-44    | 14.10555906 | 13.17073898 | 4.26E-08    | BASEMENT_MEMBRANES | 1.132802362 | 1.070977041 |
| COL6A3  | 14.10555906 | 12.4519153  | 1.42E-44    | 14.10555906 | 13.17073898 | 4.26E-08    | COLLAGENS          | 1.132802362 | 1.070977041 |
| COL9A2  | 8.976551045 | 8.737339028 | 0.010108377 | 8.976551045 | 7.855925424 | 9.54E-07    | COLLAGENS          | 1.027378132 | 1.142647182 |
| COMP    | 8.963234843 | 7.08737953  | 6.36E-30    | 8.963234843 | 6.497016949 | 2.78E-13    | ECM_GLYCOPROTEINS  | 1.264675442 | 1.379592344 |
| CRELD2  | 10.67204808 | 10.36259582 | 6.48E-18    | 10.67204808 | 9.756508475 | 2.29E-14    | ECM_GLYCOPROTEINS  | 1.029862427 | 1.093838858 |
| CRLF1   | 9.252050174 | 6.917476241 | 2.32E-142   | 9.252050174 | 7.502684746 | 3.96E-06    | SECRETED_FACTORS   | 1.337489259 | 1.233165259 |
| CST1    | 6.996181882 | 4.863208286 | 7.57E-34    | 6.996181882 | 1.573347458 | 2.38E-28    | ECM_REGULATORS     | 1.438593922 | 4.446685853 |
| CST2    | 5.005652265 | 3.491917704 | 5.71E-35    | 5.005652265 | 3.155718644 | 1.92E-09    | ECM_REGULATORS     | 1.433496631 | 1.586216273 |
| CST4    | 2.511594774 | 2.116840844 | 0.000322177 | 2.511594774 | 0.19489661  | 4.02E-13    | ECM_REGULATORS     | 1.186482574 | 12.88680584 |
| CSTB    | 13.12585784 | 12.62397843 | 1.45E-19    | 13.12585784 | 12.86257966 | 0.04338464  | ECM_REGULATORS     | 1.039756041 | 1.020468536 |
| CSTL1   | 0.852194425 | 0.539763865 | 9.06E-14    | 0.852194425 | 0.082801695 | 2.52E-06    | ECM_REGULATORS     | 1.578828224 | 10.29199252 |
| CTHRC1  | 10.32879547 | 8.906081078 | 1.29E-38    | 10.32879547 | 6.903474576 | 1.76E-36    | ECM_GLYCOPROTEINS  | 1.1597464   | 1.496173464 |
| CTSA    | 13.15958031 | 12.798058   | 7.07E-19    | 13.15958031 | 12.58433729 | 1.02E-10    | ECM_REGULATORS     | 1.028248216 | 1.04571103  |
| CTSK    | 10.83321341 | 10.28276675 | 8.02E-10    | 10.83321341 | 10.12259661 | 5.65E-05    | ECM_REGULATORS     | 1.053530988 | 1.070201039 |
| CXCL10  | 9.284108188 | 8.267030059 | 2.27E-18    | 9.284108188 | 8.647608475 | 0.009759792 | SECRETED_FACTORS   | 1.123028237 | 1.073604132 |
| CXCL13  | 8.705944599 | 6.042532066 | 2.96E-77    | 8.705944599 | 5.421954237 | 2.44E-20    | SECRETED_FACTORS   | 1.440777559 | 1.605683895 |
| CXCL9   | 10.56689251 | 8.780968916 | 1.82E-44    | 10.56689251 | 9.821430508 | 0.007066611 | SECRETED_FACTORS   | 1.203385709 | 1.075901571 |
| ECM1    | 10.37943258 | 10.00734346 | 1.72E-05    | 10.37943258 | 9.675513559 | 0.000750012 | ECM_GLYCOPROTEINS  | 1.037181608 | 1.072752626 |
| EGF     | 7.34174547  | 5.35711905  | 4.21E-58    | 7.34174547  | 5.913491525 | 1.83E-08    | SECRETED_FACTORS   | 1.370465245 | 1.241524646 |
| EGLN3   | 9.967910453 | 9.514325809 | 9.01E-06    | 9.967910453 | 7.926094915 | 5.60E-16    | ECM_REGULATORS     | 1.047673861 | 1.257606748 |
| EPYC    | 3.026194599 | 2.527657405 | 4.03E-05    | 3.026194599 | 0.858572881 | 3.65E-11    | PROTEOGLYCANS      | 1.197232898 | 3.524679925 |
| EYS     | 5.352576481 | 4.18147638  | 1.37E-81    | 5.352576481 | 4.084064407 | 1.39E-08    | ECM_GLYCOPROTEINS  | 1.280068568 | 1.310600409 |
| FGB     | 5.894201742 | 2.873140865 | 3.60E-51    | 5.894201742 | 2.491511864 | 1.46E-07    | ECM_GLYCOPROTEINS  | 2.051483731 | 2.365712894 |
| FGF19   | 2.094317944 | 1.779890069 | 0.005757324 | 2.094317944 | 0.086684746 | 1.68E-08    | SECRETED_FACTORS   | 1.176655784 | 24.16016712 |
| FGL1    | 6.417988153 | 2.661060758 | 2.18E-126   | 6.417988153 | 2.872713559 | 2.11E-12    | ECM_GLYCOPROTEINS  | 2.411815714 | 2.234120465 |
| FNDC1   | 9.255183275 | 8.057008489 | 6.92E-19    | 9.255183275 | 7.543559322 | 9.72E-12    | ECM_GLYCOPROTEINS  | 1.148712117 | 1.22689872  |
| GREM1   | 9.412007491 | 7.803377768 | 3.55E-26    | 9.412007491 | 5.534950847 | 5.70E-27    | ECM_AFFILIATED     | 1.206145309 | 1.700468125 |
| HABP2   | 7.927193554 | 4.248317993 | 6.39E-104   | 7.927193554 | 6.662459322 | 0.000659886 | ECM_REGULATORS     | 1.865960497 | 1.189829937 |
| HAPLN3  | 8.891849826 | 8.457367485 | 1.76E-08    | 8.891849826 | 7.872386441 | 2.07E-10    | PROTEOGLYCANS      | 1.051373237 | 1.129498646 |
| HPSE    | 8.395077352 | 7.687341837 | 2.24E-26    | 8.395077352 | 8.063440678 | 0.008636253 | ECM_REGULATORS     | 1.092065051 | 1.041128432 |
| HTRA3   | 10.59483031 | 9.087765894 | 4.68E-47    | 10.59483031 | 9.970138983 | 0.000913911 | ECM_REGULATORS     | 1.165834424 | 1.062656231 |
| IBSP    | 3.83315993  | 3.191351938 | 2.44E-08    | 3.83315993  | 1.325101695 | 1.41E-13    | ECM_GLYCOPROTEINS  | 1.201108497 | 2.892728871 |
| IGFBP3  | 12.77350436 | 12.34110359 | 2.30E-06    | 12.77350436 | 10.98132203 | 7.36E-16    | ECM_GLYCOPROTEINS  | 1.035037447 | 1.163202783 |
| IGFBPL1 | 4.897288328 | 3.014307923 | 6.85E-76    | 4.897288328 | 3.627474576 | 5.73E-07    | ECM_GLYCOPROTEINS  | 1.62468084  | 1.350054487 |
| KAZALD1 | 7.843300348 | 7.408597309 | 1.53E-08    | 7.843300348 | 7.289110169 | 0.000226166 | ECM_REGULATORS     | 1.058675485 | 1.076029881 |
| LAMB3   | 13.21871568 | 10.50950965 | 7.47E-112   | 13.21871568 | 12.65810508 | 0.004757765 | BASEMENT_MEMBRANES | 1.257786149 | 1.044288667 |
| LAMB3   | 13.21871568 | 10.50950965 | 7.47E-112   | 13.21871568 | 12.65810508 | 0.004757765 | ECM_GLYCOPROTEINS  | 1.257786149 | 1.044288667 |
| LGI2    | 7.865033624 | 6.633540331 | 1.03E-50    | 7.865033624 | 5.990388136 | 2.44E-16    | ECM_GLYCOPROTEINS  | 1.185646462 | 1.312942241 |
| LMAN1   | 12.61828815 | 12.35524882 | 3.09E-13    | 12.61828815 | 12.12246271 | 4.02E-06    | ECM_AFFILIATED     | 1.021289683 | 1.040901379 |

|        |             |             |             |             |             |             |                    |             |             |
|--------|-------------|-------------|-------------|-------------|-------------|-------------|--------------------|-------------|-------------|
| LOXL1  | 9.530434495 | 9.17058456  | 2.73E-05    | 9.530434495 | 8.644011864 | 7.94E-09    | ECM_REGULATORS     | 1.039239585 | 1.102547595 |
| MEP1A  | 3.116994774 | 2.603808457 | 5.53E-05    | 3.116994774 | 2.22670678  | 7.15E-05    | ECM_REGULATORS     | 1.197090656 | 1.399822735 |
| MEPE   | 1.644044077 | 0.96349417  | 2.69E-25    | 1.644044077 | 0.800840678 | 0.000299754 | ECM_GLYCOPROTEINS  | 1.706335262 | 2.052897813 |
| MFAP2  | 9.8171223   | 8.982083524 | 1.33E-12    | 9.8171223   | 8.560520339 | 3.45E-12    | ECM_GLYCOPROTEINS  | 1.092967158 | 1.146790371 |
| MMP1   | 9.346113763 | 6.655851201 | 4.78E-56    | 9.346113763 | 5.255598305 | 1.57E-24    | ECM_REGULATORS     | 1.404195118 | 1.778315849 |
| MMP10  | 5.364680314 | 4.403483631 | 1.57E-10    | 5.364680314 | 3.274566102 | 3.78E-09    | ECM_REGULATORS     | 1.218280971 | 1.638287378 |
| MMP11  | 10.25023467 | 9.902623033 | 0.004714791 | 10.25023467 | 5.693869492 | 1.11E-36    | ECM_REGULATORS     | 1.035102986 | 1.800222974 |
| MMP12  | 8.371388153 | 5.288873839 | 3.27E-81    | 8.371388153 | 4.774123729 | 1.23E-21    | ECM_REGULATORS     | 1.582829995 | 1.753492081 |
| MMP13  | 6.980947213 | 4.027926599 | 1.93E-68    | 6.980947213 | 2.404969492 | 6.67E-24    | ECM_REGULATORS     | 1.73313665  | 2.902717576 |
| MMP14  | 13.08398066 | 12.88654952 | 0.008714024 | 13.08398066 | 12.22577458 | 7.53E-10    | ECM_REGULATORS     | 1.015320714 | 1.070196459 |
| MMP15  | 11.38420157 | 10.79933345 | 7.00E-19    | 11.38420157 | 10.61801017 | 9.65E-07    | ECM_REGULATORS     | 1.054157797 | 1.072159603 |
| MMP17  | 7.08890331  | 6.563556188 | 1.78E-07    | 7.08890331  | 5.245347458 | 6.51E-15    | ECM_REGULATORS     | 1.080040013 | 1.351464963 |
| MMP7   | 10.23692892 | 8.028083566 | 1.23E-35    | 10.23692892 | 9.245591525 | 0.001139171 | ECM_REGULATORS     | 1.275139806 | 1.107222712 |
| MMP8   | 2.907500871 | 1.844659915 | 8.93E-28    | 2.907500871 | 2.022523729 | 0.000642026 | ECM_REGULATORS     | 1.576171764 | 1.437560821 |
| MMP9   | 10.63465418 | 9.186752173 | 1.50E-32    | 10.63465418 | 8.634183051 | 1.08E-14    | ECM_REGULATORS     | 1.157607605 | 1.231691999 |
| MUC13  | 6.978524042 | 4.715810945 | 1.69E-30    | 6.978524042 | 3.868523729 | 2.66E-09    | ECM_AFFILIATED     | 1.479814209 | 1.803924321 |
| MUC16  | 8.577284146 | 5.006450731 | 1.74E-84    | 8.577284146 | 6.194062712 | 3.47E-07    | ECM_AFFILIATED     | 1.713246491 | 1.38475901  |
| MUC20  | 10.88399268 | 8.842053604 | 2.42E-73    | 10.88399268 | 9.301166102 | 5.47E-11    | ECM_AFFILIATED     | 1.230934936 | 1.170175069 |
| MUC21  | 9.306322648 | 2.022117619 | 0           | 9.306322648 | 7.5981      | 0.000102819 | ECM_AFFILIATED     | 4.602265744 | 1.224822343 |
| MUC22  | 3.45166777  | 0.777409738 | 1.189e-319  | 3.45166777  | 2.673716949 | 0.008153389 | ECM_AFFILIATED     | 4.439959521 | 1.290962295 |
| MUC3A  | 8.787510279 | 6.385170582 | 1.99E-55    | 8.787510279 | 6.213061017 | 3.47E-12    | ECM_AFFILIATED     | 1.376237356 | 1.414360853 |
| MUC4   | 11.03745767 | 6.23558142  | 1.29E-198   | 11.03745767 | 9.481749153 | 7.35E-06    | ECM_AFFILIATED     | 1.770076745 | 1.164074    |
| MUC5AC | 7.14116324  | 2.897735045 | 6.61E-126   | 7.14116324  | 5.402264407 | 0.004306179 | ECM_AFFILIATED     | 2.464394822 | 1.321883326 |
| MUC5B  | 11.57477108 | 5.629958548 | 5.55E-208   | 11.57477108 | 9.071264407 | 1.38E-06    | ECM_AFFILIATED     | 2.055924743 | 1.275982108 |
| MXRA5  | 11.52951516 | 10.94950214 | 1.59E-07    | 11.52951516 | 10.36780339 | 1.36E-08    | ECM_GLYCOPROTEINS  | 1.052971634 | 1.112049942 |
| OVGP1  | 6.652351916 | 6.354716658 | 3.31E-05    | 6.652351916 | 5.599425424 | 1.68E-09    | ECM_AFFILIATED     | 1.046836905 | 1.188041882 |
| P4HA1  | 11.6889507  | 11.05711718 | 8.91E-51    | 11.6889507  | 10.97171186 | 5.90E-11    | ECM_REGULATORS     | 1.057142699 | 1.065371643 |
| P4HA3  | 7.281101394 | 6.291833294 | 3.96E-32    | 7.281101394 | 5.333608475 | 8.40E-23    | ECM_REGULATORS     | 1.157230501 | 1.365136085 |
| PAPLN  | 9.518667944 | 9.165869525 | 3.41E-06    | 9.518667944 | 9.10520678  | 0.005643014 | ECM_GLYCOPROTEINS  | 1.038490447 | 1.045409311 |
| PAPLN  | 9.518667944 | 9.165869525 | 3.41E-06    | 9.518667944 | 9.10520678  | 0.005643014 | BASEMENT_MEMBRANES | 1.038490447 | 1.045409311 |
| PCOLCE | 11.0133331  | 10.53977435 | 1.17E-09    | 11.0133331  | 10.67757797 | 0.029833938 | ECM_GLYCOPROTEINS  | 1.044930635 | 1.031444878 |
| PLAT   | 11.03202143 | 10.73300273 | 0.000841737 | 11.03202143 | 10.45898475 | 0.015789123 | ECM_REGULATORS     | 1.027859743 | 1.05478894  |
| PLAU   | 11.60701829 | 10.42690117 | 2.77E-39    | 11.60701829 | 9.921516949 | 4.90E-13    | ECM_REGULATORS     | 1.113180043 | 1.169883431 |
| PLOD2  | 11.30051063 | 11.10990963 | 0.014903702 | 11.30051063 | 9.97949661  | 7.16E-12    | ECM_REGULATORS     | 1.017155945 | 1.132372811 |
| PLXNA3 | 10.91470401 | 10.72869754 | 9.29E-05    | 10.91470401 | 10.08320339 | 1.44E-09    | ECM_AFFILIATED     | 1.017337283 | 1.082463934 |
| PLXNB3 | 8.855291463 | 8.257915569 | 1.43E-07    | 8.855291463 | 6.314579661 | 1.29E-18    | ECM_AFFILIATED     | 1.072339792 | 1.402356442 |
| PODNL1 | 7.933080662 | 6.498366151 | 8.01E-52    | 7.933080662 | 6.008613559 | 1.02E-15    | PROTEOGLYCANS      | 1.220780805 | 1.320284719 |
| POSTN  | 12.40337927 | 10.65579905 | 9.98E-31    | 12.40337927 | 10.94893051 | 1.52E-11    | ECM_GLYCOPROTEINS  | 1.164002738 | 1.132839345 |
| PRSS1  | 2.587647038 | 2.036197918 | 5.67E-05    | 2.587647038 | 0.859279661 | 2.59E-06    | ECM_REGULATORS     | 1.270822947 | 3.011414276 |
| PRSS2  | 4.882862021 | 2.997010112 | 9.46E-34    | 4.882862021 | 2.269169492 | 2.20E-08    | ECM_REGULATORS     | 1.629244426 | 2.151827812 |
| PXDN   | 11.67322056 | 11.2170192  | 6.52E-09    | 11.67322056 | 11.13572712 | 0.00115538  | ECM_GLYCOPROTEINS  | 1.040670462 | 1.048267476 |
| SDC1   | 14.15729843 | 12.22606245 | 3.77E-68    | 14.15729843 | 13.52462712 | 2.33E-07    | ECM_AFFILIATED     | 1.157960586 | 1.046779206 |
| SEMA3A | 8.497528397 | 6.75711843  | 1.74E-69    | 8.497528397 | 7.798659322 | 0.004310548 | ECM_AFFILIATED     | 1.257566888 | 1.089614002 |
| SEMA4B | 12.38422683 | 11.75074548 | 7.05E-33    | 12.38422683 | 11.02136102 | 4.51E-18    | ECM_AFFILIATED     | 1.053909886 | 1.123656762 |
| SEMA4C | 10.98127491 | 10.75306554 | 1.08E-08    | 10.98127491 | 10.15887288 | 2.03E-12    | ECM_AFFILIATED     | 1.021222727 | 1.080954063 |
| SEMA4D | 10.6511507  | 10.41271202 | 1.18E-06    | 10.6511507  | 10.36877797 | 0.008306744 | ECM_AFFILIATED     | 1.022898806 | 1.027232981 |

|                 |             |             |             |             |             |             |                   |             |             |
|-----------------|-------------|-------------|-------------|-------------|-------------|-------------|-------------------|-------------|-------------|
| <b>SEMA7A</b>   | 8.862530314 | 8.435009856 | 3.92E-09    | 8.862530314 | 8.313266102 | 0.000756518 | ECM_AFFILIATED    | 1.05068405  | 1.066070808 |
| <b>SERPINB4</b> | 2.874089024 | 2.46078551  | 0.009576698 | 2.874089024 | 1.176555932 | 1.92E-05    | ECM_REGULATORS    | 1.167955928 | 2.442798464 |
| <b>SERPINF1</b> | 11.7852716  | 11.2102417  | 4.88E-10    | 11.7852716  | 11.41286441 | 0.029084951 | ECM_REGULATORS    | 1.05129505  | 1.032630476 |
| <b>SERPINH1</b> | 13.05448188 | 12.6377388  | 3.83E-12    | 13.05448188 | 12.06749492 | 1.45E-14    | ECM_REGULATORS    | 1.032976079 | 1.081788886 |
| <b>SPP1</b>     | 12.71463206 | 11.89340338 | 1.19E-09    | 12.71463206 | 8.47020339  | 2.22E-31    | ECM_GLYCOPROTEINS | 1.069049089 | 1.501101151 |
| <b>SRPX2</b>    | 9.109969686 | 7.532673305 | 6.73E-58    | 9.109969686 | 7.412852542 | 2.75E-15    | ECM_GLYCOPROTEINS | 1.209393972 | 1.22894252  |
| <b>ST14</b>     | 13.08375679 | 11.56402765 | 1.00E-41    | 13.08375679 | 11.8177322  | 3.87E-18    | ECM_REGULATORS    | 1.131418671 | 1.107129233 |
| <b>SULF1</b>    | 11.70801376 | 10.9295462  | 2.66E-13    | 11.70801376 | 9.709867797 | 4.30E-19    | ECM_REGULATORS    | 1.071225973 | 1.205785085 |
| <b>THBS2</b>    | 11.89290052 | 11.05818659 | 5.06E-17    | 11.89290052 | 9.532767797 | 2.39E-24    | ECM_GLYCOPROTEINS | 1.075483799 | 1.247581057 |
| <b>TIMP1</b>    | 13.65900174 | 13.02316839 | 7.13E-17    | 13.65900174 | 12.24449831 | 4.53E-18    | ECM_REGULATORS    | 1.048823246 | 1.115521551 |
| <b>TNC</b>      | 12.4145378  | 11.73852488 | 3.88E-11    | 12.4145378  | 11.63503559 | 0.001687767 | ECM_GLYCOPROTEINS | 1.057589257 | 1.066996117 |
| <b>TNFAIP6</b>  | 7.036201742 | 6.401114212 | 5.69E-09    | 7.036201742 | 6.654264407 | 0.033903126 | ECM_GLYCOPROTEINS | 1.099215154 | 1.057397379 |
| <b>VCAN</b>     | 12.39823589 | 11.59335711 | 3.94E-15    | 12.39823589 | 11.20094746 | 6.05E-10    | PROTEOGLYCANS     | 1.06942586  | 1.10689171  |
| <b>WISP1</b>    | 8.288399477 | 7.190848115 | 1.05E-28    | 8.288399477 | 6.434661017 | 4.96E-20    | ECM_GLYCOPROTEINS | 1.152631699 | 1.288086421 |
| <b>WNT1</b>     | 0.908371603 | 0.686474853 | 1.05E-07    | 0.908371603 | 0.610986441 | 0.039426808 | SECRETED_FACTORS  | 1.3232409   | 1.486729561 |
| <b>WNT10A</b>   | 6.541629791 | 5.866096775 | 1.66E-08    | 6.541629791 | 5.545247458 | 6.12E-05    | SECRETED_FACTORS  | 1.11515886  | 1.179682213 |
| <b>WNT10B</b>   | 4.371216551 | 4.158620673 | 0.00933399  | 4.371216551 | 3.514228814 | 9.03E-06    | SECRETED_FACTORS  | 1.051121729 | 1.243862248 |
| <b>WNT16</b>    | 3.005846864 | 2.471660619 | 3.12E-11    | 3.005846864 | 2.36250678  | 0.016777571 | SECRETED_FACTORS  | 1.216124431 | 1.272312482 |
| <b>WNT3</b>     | 8.03024338  | 6.901643086 | 3.42E-53    | 8.03024338  | 6.367279661 | 3.70E-25    | SECRETED_FACTORS  | 1.16352632  | 1.261173344 |
| <b>WNT5B</b>    | 7.792643031 | 7.450610945 | 4.48E-05    | 7.792643031 | 7.360567797 | 0.028023667 | SECRETED_FACTORS  | 1.045906583 | 1.058701346 |
| <b>WNT8B</b>    | 2.032936934 | 1.776435163 | 0.000154055 | 2.032936934 | 1.357922034 | 0.000144436 | SECRETED_FACTORS  | 1.144391293 | 1.497094003 |
| <b>VWA1</b>     | 12.18069303 | 11.50385576 | 5.45E-28    | 12.18069303 | 11.51391356 | 1.25E-06    | ECM_GLYCOPROTEINS | 1.058835688 | 1.057910759 |
| <b>VWDE</b>     | 5.687624913 | 4.057989055 | 1.99E-41    | 5.687624913 | 4.637950847 | 0.000191182 | ECM_GLYCOPROTEINS | 1.401587051 | 1.226322809 |
| <b>ZPLD1</b>    | 2.920290244 | 2.231629151 | 6.39E-14    | 2.920290244 | 0.722018644 | 1.39E-15    | ECM_GLYCOPROTEINS | 1.308591189 | 4.044618886 |

Lung Squamous Cell Carcinoma (LUAD)

| Signature genes | Expression in tumor | Expression in rest of Pan-Cancer | P-value     | Expression in tumor | Expression in normal tissue | P-value     | Matrisome category | Fold change vs. Pan-Cancer | Fold change vs. normal |
|-----------------|---------------------|----------------------------------|-------------|---------------------|-----------------------------|-------------|--------------------|----------------------------|------------------------|
| A2ML1           | 8.646600547         | 4.481047987                      | 3.88E-115   | 8.646600547         | 2.402734                    | 8.99E-29    | ECM_REGULATORS     | 1.929593384                | 3.598650765            |
| ADAM12          | 9.935634489         | 8.348884303                      | 2.76E-44    | 9.935634489         | 7.253842                    | 2.82E-25    | ECM_REGULATORS     | 1.190055357                | 1.369706493            |
| ADAM17          | 11.59019434         | 10.0946329                       | 1.89E-202   | 11.59019434         | 11.251512                   | 0.001617325 | ECM_REGULATORS     | 1.148154119                | 1.030101052            |
| ADAM20          | 2.160307482         | 1.720521954                      | 2.67E-19    | 2.160307482         | 1.830912                    | 0.041962926 | ECM_REGULATORS     | 1.255611692                | 1.179907872            |
| ADAM23          | 9.8278              | 6.705551778                      | 6.90E-152   | 9.8278              | 6.908458                    | 6.61E-12    | ECM_REGULATORS     | 1.465621372                | 1.422575052            |
| ADAM28          | 8.67137135          | 7.91717527                       | 1.44E-18    | 8.67137135          | 7.974716                    | 0.000318447 | ECM_REGULATORS     | 1.095260753                | 1.087358014            |
| ADAMDEC1        | 7.879349453         | 5.936989589                      | 1.08E-57    | 7.879349453         | 5.746754                    | 1.80E-12    | ECM_REGULATORS     | 1.327162417                | 1.371095657            |
| ADAMTS12        | 9.588904745         | 7.851592077                      | 1.96E-63    | 9.588904745         | 8.539328                    | 8.99E-07    | ECM_REGULATORS     | 1.22126884                 | 1.12291093             |
| ADAMTS14        | 7.340764781         | 6.635430198                      | 3.71E-14    | 7.340764781         | 5.62757                     | 2.48E-15    | ECM_REGULATORS     | 1.106298245                | 1.304428871            |
| ADAMTS17        | 7.221102007         | 6.498386492                      | 6.70E-24    | 7.221102007         | 6.727954                    | 0.020029304 | ECM_REGULATORS     | 1.111214609                | 1.073298362            |
| ADAMTS18        | 4.100185401         | 3.840909856                      | 0.011868452 | 4.100185401         | 2.623042                    | 6.14E-06    | ECM_REGULATORS     | 1.067503679                | 1.563141346            |
| ADAMTS20        | 4.408810401         | 1.624489002                      | 4.31E-169   | 4.408810401         | 0.568792                    | 3.28E-24    | ECM_REGULATORS     | 2.713967529                | 7.751182157            |
| ADAMTSL5        | 6.943487591         | 6.177318889                      | 1.09E-17    | 6.943487591         | 5.74168                     | 3.49E-08    | ECM_REGULATORS     | 1.124029327                | 1.209312883            |
| AGRN            | 13.54030584         | 13.26079766                      | 1.16E-06    | 13.54030584         | 13.21525                    | 0.033302707 | BASEMENT_MEMBRANES | 1.02107778                 | 1.024597025            |
| AGRN            | 13.54030584         | 13.26079766                      | 1.16E-06    | 13.54030584         | 13.21525                    | 0.033302707 | ECM_GLYCOPROTEINS  | 1.02107778                 | 1.024597025            |
| ANXA10          | 3.382676095         | 2.250012568                      | 7.10E-14    | 3.382676095         | 1.124568                    | 7.47E-08    | ECM_AFFILIATED     | 1.5034032                  | 3.007978259            |
| ANXA8           | 11.19839507         | 5.352544442                      | 4.82E-199   | 11.19839507         | 9.918826                    | 0.000108298 | ECM_AFFILIATED     | 2.092162932                | 1.129004085            |
| ARTN            | 8.079219891         | 5.385328083                      | 6.18E-179   | 8.079219891         | 3.81504                     | 1.08E-36    | SECRETED_FACTORS   | 1.500227983                | 2.11772875             |
| ASTL            | 2.460307299         | 1.92820977                       | 6.55E-15    | 2.460307299         | 1.79538                     | 0.001139337 | ECM_REGULATORS     | 1.275954171                | 1.370354632            |
| BMP1            | 10.78444763         | 10.64880498                      | 0.005389351 | 10.78444763         | 10.46007                    | 0.012991429 | ECM_REGULATORS     | 1.012737829                | 1.031011038            |
| BMP7            | 10.44977956         | 7.991588991                      | 1.01E-49    | 10.44977956         | 7.370448                    | 2.62E-19    | SECRETED_FACTORS   | 1.307597222                | 1.417794354            |
| C1QTNF6         | 9.893833577         | 9.358422232                      | 1.69E-18    | 9.893833577         | 8.017602                    | 2.90E-25    | ECM_AFFILIATED     | 1.057211711                | 1.234014058            |
| CCL26           | 5.073585219         | 2.992511927                      | 1.42E-130   | 5.073585219         | 2.649104                    | 9.91E-19    | SECRETED_FACTORS   | 1.6954269                  | 1.915208017            |
| CCL7            | 3.754296533         | 2.122847421                      | 7.44E-76    | 3.754296533         | 2.688636                    | 4.29E-05    | SECRETED_FACTORS   | 1.768519252                | 1.39635731             |
| CD109           | 11.66947117         | 9.685100993                      | 2.12E-114   | 11.66947117         | 10.475196                   | 2.81E-09    | ECM_REGULATORS     | 1.20488895                 | 1.114009816            |
| CILP            | 7.870831204         | 6.874250443                      | 2.33E-13    | 7.870831204         | 7.15791                     | 0.021615322 | ECM_GLYCOPROTEINS  | 1.144973008                | 1.099599074            |
| CILP2           | 7.506387774         | 6.195282958                      | 8.13E-32    | 7.506387774         | 5.045382                    | 1.78E-19    | ECM_GLYCOPROTEINS  | 1.211629529                | 1.487773924            |
| CLEC2A          | 0.643396533         | 0.358863609                      | 2.43E-08    | 0.643396533         | 0.043618                    | 0.00644145  | ECM_AFFILIATED     | 1.792872045                | 14.75071147            |
| CLEC2L          | 4.673113321         | 2.600579466                      | 3.43E-74    | 4.673113321         | 1.674224                    | 7.01E-12    | ECM_AFFILIATED     | 1.796950788                | 2.791211523            |
| COCH            | 8.27134854          | 6.334502499                      | 2.90E-69    | 8.27134854          | 5.474966                    | 1.03E-14    | ECM_GLYCOPROTEINS  | 1.305761351                | 1.510757974            |
| COL10A1         | 9.31967135          | 6.53605465                       | 4.69E-67    | 9.31967135          | 6.248992                    | 4.67E-22    | COLLAGENS          | 1.425886387                | 1.491387947            |
| COL11A1         | 9.538168613         | 7.216588393                      | 1.78E-43    | 9.538168613         | 4.435304                    | 1.38E-33    | COLLAGENS          | 1.321700517                | 2.150510678            |
| COL16A1         | 11.03827135         | 10.44124955                      | 1.24E-11    | 11.03827135         | 10.446768                   | 0.004580538 | COLLAGENS          | 1.057179153                | 1.056620703            |
| COL17A1         | 11.5984708          | 7.609714255                      | 9.34E-104   | 11.5984708          | 6.779046                    | 7.83E-27    | COLLAGENS          | 1.524166403                | 1.71092965             |
| COL19A1         | 3.078537956         | 2.565919327                      | 5.57E-07    | 3.078537956         | 2.354778                    | 0.040761256 | COLLAGENS          | 1.199779714                | 1.307358042            |
| COL1A1          | 16.03940182         | 14.60099167                      | 4.07E-26    | 16.03940182         | 14.015766                   | 1.48E-13    | COLLAGENS          | 1.098514552                | 1.14438282             |
| COL1A2          | 15.58816661         | 14.3746144                       | 9.01E-25    | 15.58816661         | 14.877108                   | 0.001906581 | COLLAGENS          | 1.084423287                | 1.047795486            |
| COL24A1         | 6.535150912         | 5.194934608                      | 3.44E-51    | 6.535150912         | 5.455178                    | 1.20E-09    | COLLAGENS          | 1.257985212                | 1.197972076            |
| COL27A1         | 9.998671168         | 9.600441399                      | 5.14E-07    | 9.998671168         | 9.153602                    | 3.48E-05    | COLLAGENS          | 1.04148036                 | 1.092320943            |
| COL2A1          | 4.731746533         | 4.216924634                      | 0.000611432 | 4.731746533         | 2.873426                    | 1.36E-06    | COLLAGENS          | 1.122084681                | 1.646726428            |
| COL3A1          | 15.86105219         | 14.10683089                      | 2.39E-41    | 15.86105219         | 14.058312                   | 8.50E-12    | COLLAGENS          | 1.124352614                | 1.128233047            |

|          |             |             |             |             |           |             |                    |             |             |
|----------|-------------|-------------|-------------|-------------|-----------|-------------|--------------------|-------------|-------------|
| COL4A5   | 11.00072245 | 9.233981548 | 1.55E-64    | 11.00072245 | 10.011668 | 2.46E-05    | COLLAGENS          | 1.191330347 | 1.098790176 |
| COL4A5   | 11.00072245 | 9.233981548 | 1.55E-64    | 11.00072245 | 10.011668 | 2.46E-05    | BASEMENT_MEMBRANES | 1.191330347 | 1.098790176 |
| COL4A6   | 9.060562409 | 6.084243043 | 8.62E-111   | 9.060562409 | 7.154312  | 5.60E-08    | BASEMENT_MEMBRANES | 1.489184825 | 1.26644776  |
| COL4A6   | 9.060562409 | 6.084243043 | 8.62E-111   | 9.060562409 | 7.154312  | 5.60E-08    | COLLAGENS          | 1.489184825 | 1.26644776  |
| COL5A1   | 13.01577391 | 11.68922889 | 9.39E-35    | 13.01577391 | 11.810644 | 1.46E-07    | COLLAGENS          | 1.11348439  | 1.102037612 |
| COL5A2   | 12.5918188  | 11.40793507 | 1.64E-33    | 12.5918188  | 11.118954 | 1.10E-11    | COLLAGENS          | 1.103777215 | 1.13246433  |
| COL7A1   | 12.0410292  | 9.192337939 | 6.19E-131   | 12.0410292  | 7.040214  | 2.94E-40    | COLLAGENS          | 1.309898448 | 1.710321476 |
| CRELD2   | 10.64335967 | 10.36259582 | 8.62E-15    | 10.64335967 | 10.004696 | 4.03E-10    | ECM_GLYCOPROTEINS  | 1.027093969 | 1.06383639  |
| CRISPLD1 | 8.665226095 | 8.102181612 | 3.73E-08    | 8.665226095 | 7.840674  | 0.000131764 | ECM_GLYCOPROTEINS  | 1.069492948 | 1.10516342  |
| CRNN     | 2.342176642 | 1.271700427 | 1.01E-16    | 2.342176642 | 0.924678  | 0.000714504 | SECRETED_FACTORS   | 1.841767599 | 2.532964602 |
| CST1     | 7.341701825 | 4.863208286 | 2.75E-43    | 7.341701825 | 2.290916  | 1.38E-23    | ECM_REGULATORS     | 1.509641659 | 3.204701449 |
| CST11    | 0.338239234 | 0.206593668 | 4.18E-06    | 0.338239234 | 0         | 0.0028002   | ECM_REGULATORS     | 1.637219751 | Inf         |
| CST2     | 4.080574453 | 3.491917704 | 2.38E-06    | 4.080574453 | 3.254296  | 0.007377502 | ECM_REGULATORS     | 1.168576925 | 1.253903902 |
| CST4     | 2.492257299 | 2.116840844 | 0.000793745 | 2.492257299 | 0.094936  | 2.51E-13    | ECM_REGULATORS     | 1.177347511 | 26.2519729  |
| CSTA     | 11.59151241 | 7.376330763 | 1.38E-217   | 11.59151241 | 9.299326  | 8.50E-14    | ECM_REGULATORS     | 1.57144694  | 1.246489521 |
| CSTB     | 13.73386807 | 12.62397843 | 1.58E-83    | 13.73386807 | 13.07272  | 1.74E-05    | ECM_REGULATORS     | 1.087919164 | 1.050574637 |
| CSTL1    | 1.054700547 | 0.539763865 | 1.00E-33    | 1.054700547 | 0.0424    | 3.28E-10    | ECM_REGULATORS     | 1.954003621 | 24.87501291 |
| CTHRC1   | 10.68446241 | 8.906081078 | 3.84E-57    | 10.68446241 | 7.69606   | 8.52E-34    | ECM_GLYCOPROTEINS  | 1.199681691 | 1.388302899 |
| CTSK     | 11.14175584 | 10.28276675 | 8.75E-21    | 11.14175584 | 10.655276 | 0.015407042 | ECM_REGULATORS     | 1.083536767 | 1.04565624  |
| CTSV     | 9.500482117 | 7.28437811  | 2.23E-81    | 9.500482117 | 5.84878   | 1.55E-38    | ECM_REGULATORS     | 1.304226932 | 1.624352791 |
| CXCL10   | 9.611589781 | 8.267030059 | 1.89E-29    | 9.611589781 | 9.058222  | 0.048275056 | SECRETED_FACTORS   | 1.162641204 | 1.06109011  |
| CXCL13   | 9.079429197 | 6.042532066 | 3.70E-95    | 9.079429197 | 6.130736  | 9.74E-15    | SECRETED_FACTORS   | 1.502586846 | 1.480968875 |
| CXCL14   | 10.76109197 | 9.895338473 | 1.12E-07    | 10.76109197 | 7.702888  | 3.00E-16    | SECRETED_FACTORS   | 1.087491044 | 1.397020438 |
| CXCL6    | 7.429093248 | 4.310898089 | 4.68E-106   | 7.429093248 | 6.05043   | 0.000433487 | SECRETED_FACTORS   | 1.723328433 | 1.227862028 |
| DDX26B   | 8.40835     | 8.158415761 | 1.37E-05    | 8.40835     | 8.067562  | 0.013442348 | ECM_GLYCOPROTEINS  | 1.030635144 | 1.042241758 |
| DMP1     | 2.225825365 | 1.386894842 | 3.67E-34    | 2.225825365 | 0.640736  | 6.07E-16    | ECM_GLYCOPROTEINS  | 1.604898437 | 3.473857197 |
| DSPP     | 0.90179854  | 0.544958676 | 1.32E-15    | 0.90179854  | 0.10041   | 4.00E-09    | ECM_GLYCOPROTEINS  | 1.654801694 | 8.981162635 |
| EGLN3    | 11.0053438  | 9.514325809 | 5.89E-46    | 11.0053438  | 8.391256  | 3.01E-23    | ECM_REGULATORS     | 1.156712942 | 1.311525211 |
| EMILIN3  | 6.201634307 | 4.974561559 | 1.33E-27    | 6.201634307 | 4.257484  | 2.03E-07    | ECM_GLYCOPROTEINS  | 1.246669527 | 1.456643009 |
| EPYC     | 2.94842792  | 2.527657405 | 0.000663543 | 2.94842792  | 0.993914  | 7.35E-10    | PROTEOGLYCANS      | 1.166466592 | 2.966481929 |
| F12      | 7.722950365 | 7.239870699 | 1.17E-05    | 7.722950365 | 4.653612  | 2.47E-37    | ECM_REGULATORS     | 1.066724902 | 1.659560437 |
| FAM20B   | 11.70546496 | 11.28599471 | 1.33E-50    | 11.70546496 | 11.462064 | 0.009034253 | ECM_REGULATORS     | 1.037167326 | 1.021235352 |
| FBN2     | 8.654026825 | 7.214706321 | 1.33E-36    | 8.654026825 | 5.714504  | 1.28E-10    | ECM_GLYCOPROTEINS  | 1.199498142 | 1.514396844 |
| FGF11    | 9.319413869 | 7.581973561 | 4.79E-72    | 9.319413869 | 5.181768  | 9.32E-45    | SECRETED_FACTORS   | 1.229154097 | 1.798500795 |
| FGF12    | 7.214895985 | 6.297278665 | 1.87E-18    | 7.214895985 | 6.22049   | 0.000505748 | SECRETED_FACTORS   | 1.145716486 | 1.159859751 |
| FGF19    | 2.867705474 | 1.779890069 | 3.14E-20    | 2.867705474 | 0.319134  | 3.97E-08    | SECRETED_FACTORS   | 1.611169995 | 8.985897693 |
| FGF3     | 0.655310766 | 0.441621676 | 0.000522181 | 0.655310766 | 0.066276  | 0.026133206 | SECRETED_FACTORS   | 1.483873644 | 9.887602849 |
| FNDC1    | 9.342585949 | 8.057008489 | 1.36E-20    | 9.342585949 | 8.008618  | 1.52E-06    | ECM_GLYCOPROTEINS  | 1.159560147 | 1.16656656  |
| FNDC8    | 1.346417336 | 1.185251575 | 0.000270973 | 1.346417336 | 0.902056  | 0.002342554 | ECM_GLYCOPROTEINS  | 1.135975994 | 1.492609479 |
| GPC1     | 13.20194161 | 11.54649143 | 9.85E-132   | 13.20194161 | 10.789932 | 2.96E-26    | ECM_AFFILIATED     | 1.143372573 | 1.223542614 |
| GPC2     | 5.882286679 | 5.581202819 | 0.001243922 | 5.882286679 | 3.24719   | 2.59E-26    | ECM_AFFILIATED     | 1.053946052 | 1.811500614 |
| GREM1    | 10.09896624 | 7.803377768 | 1.65E-49    | 10.09896624 | 6.264874  | 3.18E-29    | ECM_AFFILIATED     | 1.294178821 | 1.611998301 |
| HAPLN3   | 9.618239234 | 8.457367485 | 9.39E-49    | 9.618239234 | 8.514438  | 1.15E-11    | PROTEOGLYCANS      | 1.137261595 | 1.129638766 |
| HPSE     | 8.708708759 | 7.687341837 | 2.44E-50    | 8.708708759 | 8.345318  | 0.015031287 | ECM_REGULATORS     | 1.132863471 | 1.043544267 |
| HRG      | 2.512062774 | 1.764826866 | 2.15E-06    | 2.512062774 | 0.461036  | 3.99E-11    | ECM_REGULATORS     | 1.423404654 | 5.448734532 |
| HTRA3    | 10.83117482 | 9.087765894 | 1.10E-59    | 10.83117482 | 10.447054 | 0.040750311 | ECM_REGULATORS     | 1.191841311 | 1.036768338 |

|        |             |             |             |             |           |             |                    |             |             |
|--------|-------------|-------------|-------------|-------------|-----------|-------------|--------------------|-------------|-------------|
| IBSP   | 4.025513869 | 3.191351938 | 7.54E-13    | 4.025513869 | 1.25143   | 4.80E-24    | ECM_GLYCOPROTEINS  | 1.261381993 | 3.216731154 |
| IGFBP2 | 13.49237664 | 11.45141622 | 4.70E-87    | 13.49237664 | 11.0501   | 1.39E-16    | ECM_GLYCOPROTEINS  | 1.178227774 | 1.22101851  |
| IGFBP3 | 13.43426624 | 12.34110359 | 2.89E-31    | 13.43426624 | 11.424918 | 7.50E-16    | ECM_GLYCOPROTEINS  | 1.088579003 | 1.175874194 |
| IGFBP5 | 13.89259982 | 13.31700634 | 1.90E-08    | 13.89259982 | 13.174706 | 0.000860734 | ECM_GLYCOPROTEINS  | 1.043222438 | 1.05449031  |
| ITIH6  | 3.166669891 | 2.714329856 | 0.000482406 | 3.166669891 | 0.795968  | 4.04E-21    | ECM_REGULATORS     | 1.166648882 | 3.978388441 |
| KCP    | 6.424840511 | 5.963599477 | 9.35E-06    | 6.424840511 | 4.890912  | 3.54E-10    | ECM_GLYCOPROTEINS  | 1.077342725 | 1.313628319 |
| LAMA1  | 8.62599635  | 7.364141068 | 6.39E-25    | 8.62599635  | 6.515078  | 2.02E-09    | ECM_GLYCOPROTEINS  | 1.171351319 | 1.324005077 |
| LAMA1  | 8.62599635  | 7.364141068 | 6.39E-25    | 8.62599635  | 6.515078  | 2.02E-09    | BASEMENT_MEMBRANES | 1.171351319 | 1.324005077 |
| LAMA5  | 12.91348102 | 12.29558791 | 8.90E-23    | 12.91348102 | 12.479082 | 0.008005131 | BASEMENT_MEMBRANES | 1.050253238 | 1.034810174 |
| LAMA5  | 12.91348102 | 12.29558791 | 8.90E-23    | 12.91348102 | 12.479082 | 0.008005131 | ECM_GLYCOPROTEINS  | 1.050253238 | 1.034810174 |
| LAMB3  | 13.66504434 | 10.50950965 | 1.73E-143   | 13.66504434 | 12.649714 | 1.43E-06    | BASEMENT_MEMBRANES | 1.300255178 | 1.080265083 |
| LAMB3  | 13.66504434 | 10.50950965 | 1.73E-143   | 13.66504434 | 12.649714 | 1.43E-06    | ECM_GLYCOPROTEINS  | 1.300255178 | 1.080265083 |
| LAMC2  | 13.53287135 | 9.777165179 | 2.84E-106   | 13.53287135 | 12.485904 | 4.39E-05    | BASEMENT_MEMBRANES | 1.38413038  | 1.083851946 |
| LAMC2  | 13.53287135 | 9.777165179 | 2.84E-106   | 13.53287135 | 12.485904 | 4.39E-05    | ECM_GLYCOPROTEINS  | 1.38413038  | 1.083851946 |
| LGALS7 | 6.138242883 | 2.521967037 | 1.53E-141   | 6.138242883 | 1.662822  | 6.19E-21    | ECM_AFFILIATED     | 2.43391083  | 3.691461193 |
| LGI2   | 7.271919526 | 6.633540331 | 2.13E-14    | 7.271919526 | 6.685724  | 0.011557024 | ECM_GLYCOPROTEINS  | 1.096235066 | 1.087678691 |
| LMAN1  | 12.60747974 | 12.35524882 | 4.30E-12    | 12.60747974 | 12.224118 | 7.03E-06    | ECM_AFFILIATED     | 1.02041488  | 1.031361097 |
| LOXL1  | 10.02550931 | 9.17058456  | 2.25E-22    | 10.02550931 | 9.165316  | 1.10E-07    | ECM_REGULATORS     | 1.093224673 | 1.093853099 |
| LOXL2  | 10.49420985 | 10.1490868  | 8.36E-06    | 10.49420985 | 9.479968  | 4.40E-07    | ECM_REGULATORS     | 1.034005331 | 1.106987898 |
| MFAP1  | 10.44435566 | 10.38744451 | 0.008601781 | 10.44435566 | 10.228088 | 0.000835841 | ECM_GLYCOPROTEINS  | 1.00547884  | 1.021144485 |
| MFAP2  | 10.76625566 | 8.982083524 | 2.94E-49    | 10.76625566 | 9.0782    | 2.74E-18    | ECM_GLYCOPROTEINS  | 1.198636778 | 1.185946075 |
| MMP1   | 11.06820146 | 6.655851201 | 7.54E-139   | 11.06820146 | 6.488356  | 2.61E-28    | ECM_REGULATORS     | 1.66292802  | 1.705856069 |
| MMP10  | 8.922525    | 4.403483631 | 1.16E-178   | 8.922525    | 4.411314  | 3.00E-18    | ECM_REGULATORS     | 2.026242346 | 2.022645633 |
| MMP11  | 11.24844361 | 9.902623033 | 8.78E-27    | 11.24844361 | 6.389998  | 1.59E-41    | ECM_REGULATORS     | 1.135905464 | 1.760320365 |
| MMP12  | 10.36185438 | 5.288873839 | 1.58E-202   | 10.36185438 | 5.287452  | 8.00E-41    | ECM_REGULATORS     | 1.959179722 | 1.959706562 |
| MMP13  | 7.822345803 | 4.027926599 | 2.21E-105   | 7.822345803 | 3.633838  | 9.08E-16    | ECM_REGULATORS     | 1.942027892 | 2.152640212 |
| MMP14  | 13.77446004 | 12.88654952 | 1.18E-30    | 13.77446004 | 12.540866 | 2.52E-17    | ECM_REGULATORS     | 1.068902115 | 1.098365937 |
| MMP20  | 1.20065146  | 0.621304132 | 1.78E-27    | 1.20065146  | 0.07673   | 3.00E-06    | ECM_REGULATORS     | 1.93246978  | 15.64774482 |
| MMP27  | 1.014506569 | 0.790822424 | 0.000173395 | 1.014506569 | 0.583164  | 0.023556332 | ECM_REGULATORS     | 1.282850029 | 1.739659117 |
| MMP3   | 6.709239964 | 4.47830094  | 2.70E-38    | 6.709239964 | 2.545218  | 6.30E-22    | ECM_REGULATORS     | 1.498166393 | 2.636017804 |
| MMP7   | 10.10642318 | 8.028083566 | 1.43E-30    | 10.10642318 | 9.45505   | 0.020689762 | ECM_REGULATORS     | 1.258883654 | 1.068891563 |
| MMP8   | 3.559166606 | 1.844659915 | 4.70E-66    | 3.559166606 | 2.581158  | 0.000465321 | ECM_REGULATORS     | 1.929443242 | 1.378903037 |
| MMP9   | 11.20170766 | 9.186752173 | 1.56E-58    | 11.20170766 | 9.37426   | 5.33E-12    | ECM_REGULATORS     | 1.219332736 | 1.194943138 |
| MUC20  | 10.1498531  | 8.842053604 | 7.33E-30    | 10.1498531  | 9.471318  | 0.022205436 | ECM_AFFILIATED     | 1.14790676  | 1.071641043 |
| MUCL1  | 3.799071168 | 2.585652963 | 2.49E-15    | 3.799071168 | 1.998758  | 1.44E-06    | ECM_AFFILIATED     | 1.469288888 | 1.900715929 |
| MXRA5  | 12.10781825 | 10.94950214 | 1.69E-24    | 12.10781825 | 10.90326  | 5.89E-08    | ECM_GLYCOPROTEINS  | 1.105787103 | 1.110476889 |
| NELL1  | 5.049544708 | 3.183604624 | 9.32E-40    | 5.049544708 | 3.582784  | 0.002912466 | ECM_GLYCOPROTEINS  | 1.586109239 | 1.40939133  |
| NELL2  | 9.280001642 | 7.784212985 | 2.64E-35    | 9.280001642 | 8.542114  | 0.005751805 | ECM_GLYCOPROTEINS  | 1.192156697 | 1.086382322 |
| NTN1   | 9.740960584 | 8.373452995 | 2.99E-38    | 9.740960584 | 9.244002  | 0.029825567 | ECM_GLYCOPROTEINS  | 1.163314655 | 1.053760112 |
| NTN1   | 9.740960584 | 8.373452995 | 2.99E-38    | 9.740960584 | 9.244002  | 0.029825567 | BASEMENT_MEMBRANES | 1.163314655 | 1.053760112 |
| NTN3   | 2.346226277 | 2.122345115 | 0.002222824 | 2.346226277 | 1.454284  | 2.89E-05    | ECM_GLYCOPROTEINS  | 1.105487633 | 1.61332056  |
| NTN3   | 2.346226277 | 2.122345115 | 0.002222824 | 2.346226277 | 1.454284  | 2.89E-05    | BASEMENT_MEMBRANES | 1.105487633 | 1.61332056  |
| OGFOD1 | 10.59556606 | 10.4677929  | 6.54E-09    | 10.59556606 | 10.249286 | 4.13E-08    | ECM_REGULATORS     | 1.012206313 | 1.033785774 |
| OTOG   | 1.545167701 | 1.321034351 | 0.007569108 | 1.545167701 | 0.082344  | 6.90E-09    | ECM_GLYCOPROTEINS  | 1.169665043 | 18.76478797 |
| P4HA1  | 11.94876113 | 11.05711718 | 4.85E-94    | 11.94876113 | 11.087436 | 9.81E-13    | ECM_REGULATORS     | 1.080639821 | 1.077684789 |
| P4HA3  | 6.910732117 | 6.291833294 | 4.17E-13    | 6.910732117 | 6.022376  | 5.78E-06    | ECM_REGULATORS     | 1.09836542  | 1.147509242 |



|           |             |             |             |             |           |             |                   |             |             |
|-----------|-------------|-------------|-------------|-------------|-----------|-------------|-------------------|-------------|-------------|
| PI3       | 10.01309726 | 5.739437608 | 1.91E-99    | 10.01309726 | 6.41362   | 3.61E-13    | ECM_REGULATORS    | 1.744612965 | 1.561223968 |
| PLAT      | 11.46175347 | 10.73300273 | 1.36E-15    | 11.46175347 | 10.873996 | 0.008476133 | ECM_REGULATORS    | 1.067898122 | 1.054051654 |
| PLAU      | 12.33468102 | 10.42690117 | 3.23E-95    | 12.33468102 | 10.292114 | 2.73E-20    | ECM_REGULATORS    | 1.182967098 | 1.198459425 |
| PLOD1     | 12.8454146  | 12.50815465 | 4.02E-15    | 12.8454146  | 12.052784 | 1.73E-10    | ECM_REGULATORS    | 1.026963206 | 1.065763279 |
| PLOD2     | 11.87069945 | 11.10990963 | 1.42E-21    | 11.87069945 | 10.217694 | 1.83E-21    | ECM_REGULATORS    | 1.068478489 | 1.16177872  |
| PLXNA1    | 12.58902974 | 11.44635716 | 2.85E-91    | 12.58902974 | 11.957206 | 2.17E-06    | ECM_AFFILIATED    | 1.099828493 | 1.052840416 |
| PLXNB3    | 9.293770438 | 8.257915569 | 2.56E-19    | 9.293770438 | 6.656892  | 1.07E-29    | ECM_AFFILIATED    | 1.125437813 | 1.396112546 |
| PODNL1    | 7.758440146 | 6.498366151 | 2.61E-39    | 7.758440146 | 6.501072  | 9.55E-10    | PROTEOGLYCANS     | 1.193906278 | 1.193409356 |
| POSTN     | 12.73912372 | 10.65579905 | 5.97E-41    | 12.73912372 | 11.457848 | 2.50E-07    | ECM_GLYCOPROTEINS | 1.195510882 | 1.111825163 |
| PRSS1     | 3.104124453 | 2.036197918 | 2.03E-14    | 3.104124453 | 1.168906  | 8.35E-08    | ECM_REGULATORS    | 1.52447089  | 2.655580904 |
| PRSS2     | 5.38712646  | 2.997010112 | 3.48E-51    | 5.38712646  | 3.314658  | 7.61E-06    | ECM_REGULATORS    | 1.797500261 | 1.625243527 |
| PXDNL     | 4.993241788 | 4.497337266 | 4.58E-08    | 4.993241788 | 4.575702  | 0.029967658 | ECM_GLYCOPROTEINS | 1.110266251 | 1.091251526 |
| SDC1      | 14.79921186 | 12.22606245 | 1.15E-112   | 14.79921186 | 13.461974 | 4.47E-16    | ECM_AFFILIATED    | 1.210464279 | 1.099334456 |
| SEMA3F    | 11.50432518 | 10.60397557 | 1.53E-28    | 11.50432518 | 10.607284 | 5.99E-12    | ECM_AFFILIATED    | 1.084906798 | 1.084568414 |
| SEMA4B    | 13.13464562 | 11.75074548 | 4.95E-139   | 13.13464562 | 11.28714  | 6.24E-23    | ECM_AFFILIATED    | 1.117771264 | 1.163682352 |
| SEMA4C    | 11.07020438 | 10.75306554 | 6.45E-15    | 11.07020438 | 10.403734 | 1.12E-08    | ECM_AFFILIATED    | 1.029492877 | 1.06406069  |
| SEMA4F    | 9.450489599 | 8.601750593 | 1.22E-79    | 9.450489599 | 8.960048  | 3.64E-05    | ECM_AFFILIATED    | 1.098670497 | 1.054736492 |
| SERPINB11 | 4.250412774 | 1.213348105 | 2.05E-156   | 4.250412774 | 2.500328  | 0.00012945  | ECM_REGULATORS    | 3.503044804 | 1.699942077 |
| SERPINB12 | 3.030064964 | 0.6472548   | 2.00E-199   | 3.030064964 | 0.3851    | 1.28E-10    | ECM_REGULATORS    | 4.681409801 | 7.868254904 |
| SERPINB13 | 9.081497993 | 2.003399968 | 0           | 9.081497993 | 2.821118  | 6.89E-26    | ECM_REGULATORS    | 4.533042896 | 3.219113129 |
| SERPINB2  | 7.883534672 | 3.769084495 | 4.03E-140   | 7.883534672 | 5.37378   | 2.01E-08    | ECM_REGULATORS    | 2.091631186 | 1.467037108 |
| SERPINB3  | 9.617741058 | 2.953548105 | 2.16E-252   | 9.617741058 | 5.719938  | 3.86E-13    | ECM_REGULATORS    | 3.256334658 | 1.681441487 |
| SERPINB4  | 7.508500547 | 2.46078551  | 2.21E-197   | 7.508500547 | 2.282844  | 1.61E-21    | ECM_REGULATORS    | 3.051261688 | 3.289099276 |
| SERPINB5  | 11.44991825 | 5.779809963 | 4.03E-149   | 11.44991825 | 4.77262   | 6.36E-47    | ECM_REGULATORS    | 1.981019847 | 2.399084412 |
| SERPINB7  | 6.524130657 | 3.028885542 | 3.06E-138   | 6.524130657 | 2.85953   | 1.88E-17    | ECM_REGULATORS    | 2.153970682 | 2.281539504 |
| SERPINE2  | 11.08869818 | 10.80134688 | 0.005466568 | 11.08869818 | 8.999292  | 9.82E-19    | ECM_REGULATORS    | 1.026603284 | 1.232174506 |
| SERPINH1  | 13.35134416 | 12.6377388  | 2.91E-31    | 13.35134416 | 12.423648 | 1.66E-13    | ECM_REGULATORS    | 1.056466221 | 1.0746718   |
| SERPINI1  | 8.411880109 | 8.004189151 | 3.44E-08    | 8.411880109 | 7.758726  | 0.001055219 | ECM_REGULATORS    | 1.050934698 | 1.084183165 |
| SPOCK3    | 5.51814854  | 3.721253049 | 2.77E-29    | 5.51814854  | 4.162816  | 0.000720377 | PROTEOGLYCANS     | 1.482873771 | 1.325580698 |
| SPP1      | 13.54572299 | 11.89340338 | 5.53E-33    | 13.54572299 | 9.487244  | 1.73E-28    | ECM_GLYCOPROTEINS | 1.1389274   | 1.427782715 |
| SRPX2     | 9.098075547 | 7.532673305 | 3.55E-55    | 9.098075547 | 8.074988  | 3.15E-08    | ECM_GLYCOPROTEINS | 1.207814965 | 1.126698337 |
| ST14      | 12.98226661 | 11.56402765 | 3.65E-35    | 12.98226661 | 11.851808 | 6.59E-19    | ECM_REGULATORS    | 1.122642301 | 1.095382798 |
| SULF1     | 12.15466004 | 10.9295462  | 2.23E-29    | 12.15466004 | 10.294112 | 3.74E-17    | ECM_REGULATORS    | 1.112091921 | 1.180739051 |
| TGM3      | 5.620668978 | 3.957551628 | 1.54E-31    | 5.620668978 | 4.407694  | 0.006882783 | ECM_REGULATORS    | 1.420238952 | 1.275194916 |
| TGM4      | 2.787642701 | 2.008516903 | 1.16E-13    | 2.787642701 | 2.08783   | 0.005902149 | ECM_REGULATORS    | 1.387910998 | 1.33518663  |
| TGM5      | 4.813358577 | 2.888203759 | 1.23E-61    | 4.813358577 | 1.353268  | 1.01E-20    | ECM_REGULATORS    | 1.666557826 | 3.556840609 |
| TGM6      | 0.798854927 | 0.259174704 | 3.54E-36    | 0.798854927 | 0.013962  | 0.000206453 | ECM_REGULATORS    | 3.082302847 | 57.21636778 |
| THBS2     | 12.15564288 | 11.05818659 | 4.30E-27    | 12.15564288 | 10.365326 | 9.17E-14    | ECM_GLYCOPROTEINS | 1.099243785 | 1.172721715 |
| TLL2      | 5.185689416 | 4.938260406 | 0.001887203 | 5.185689416 | 2.881134  | 3.68E-20    | ECM_REGULATORS    | 1.050104488 | 1.799877901 |
| TMPRSS15  | 1.564481387 | 0.974273241 | 2.36E-14    | 1.564481387 | 0.342546  | 1.58E-06    | ECM_REGULATORS    | 1.605793243 | 4.56721546  |
| TNC       | 13.31201953 | 11.73852488 | 1.35E-50    | 13.31201953 | 12.211386 | 7.66E-05    | ECM_GLYCOPROTEINS | 1.134045347 | 1.090131745 |
| TSKU      | 11.7310615  | 10.79481481 | 3.26E-34    | 11.7310615  | 9.818012  | 3.00E-30    | ECM_GLYCOPROTEINS | 1.086731148 | 1.194851004 |
| VCAN      | 12.36162664 | 11.59335711 | 2.17E-13    | 12.36162664 | 11.758308 | 0.002691562 | PROTEOGLYCANS     | 1.066268082 | 1.051309988 |
| WISP1     | 8.824367883 | 7.190848115 | 2.09E-58    | 8.824367883 | 7.348638  | 2.98E-11    | ECM_GLYCOPROTEINS | 1.227166496 | 1.200816789 |
| WNT10A    | 7.135885401 | 5.866096775 | 5.16E-25    | 7.135885401 | 5.978018  | 7.09E-05    | SECRETED_FACTORS  | 1.21646227  | 1.193687507 |
| WNT10B    | 5.424705109 | 4.158620673 | 4.33E-50    | 5.424705109 | 3.643778  | 1.21E-10    | SECRETED_FACTORS  | 1.304448166 | 1.488758401 |

|              |             |             |           |             |           |             |                   |             |             |
|--------------|-------------|-------------|-----------|-------------|-----------|-------------|-------------------|-------------|-------------|
| <b>WNT16</b> | 4.082458577 | 2.471660619 | 2.44E-83  | 4.082458577 | 2.480258  | 3.01E-07    | SECRETED_FACTORS  | 1.651706769 | 1.645981417 |
| <b>WNT3</b>  | 7.473125547 | 6.901643086 | 2.21E-14  | 7.473125547 | 6.459614  | 1.21E-09    | SECRETED_FACTORS  | 1.082803827 | 1.156899708 |
| <b>WNT5A</b> | 11.1535219  | 8.931545478 | 4.00E-107 | 11.1535219  | 9.820158  | 6.40E-08    | SECRETED_FACTORS  | 1.248778493 | 1.135778253 |
| <b>WNT5B</b> | 8.44740438  | 7.450610945 | 4.82E-31  | 8.44740438  | 7.477104  | 9.76E-06    | SECRETED_FACTORS  | 1.133786805 | 1.129769544 |
| <b>WNT7B</b> | 10.98979416 | 6.848191223 | 5.09E-149 | 10.98979416 | 9.483946  | 6.04E-10    | SECRETED_FACTORS  | 1.604773261 | 1.158778652 |
| <b>VWA9</b>  | 10.83498193 | 10.620444   | 5.59E-28  | 10.83498193 | 10.373318 | 5.93E-12    | ECM_GLYCOPROTEINS | 1.020200467 | 1.044504944 |
| <b>VWDE</b>  | 6.359392518 | 4.057989055 | 1.44E-76  | 6.359392518 | 4.935474  | 6.46E-06    | ECM_GLYCOPROTEINS | 1.567129046 | 1.288506943 |
| <b>XCL1</b>  | 6.157655474 | 3.996191618 | 2.88E-133 | 6.157655474 | 5.536504  | 0.000305562 | SECRETED_FACTORS  | 1.540880935 | 1.112192003 |
| <b>ZFP91</b> | 11.88391241 | 11.64715431 | 1.34E-17  | 11.88391241 | 11.69422  | 0.001915432 | SECRETED_FACTORS  | 1.020327549 | 1.01622104  |
| <b>ZP3</b>   | 8.355566971 | 7.77258977  | 4.58E-19  | 8.355566971 | 6.171748  | 3.03E-27    | ECM_GLYCOPROTEINS | 1.075004242 | 1.353841241 |
| <b>ZP4</b>   | 0.917193066 | 0.347357779 | 1.17E-34  | 0.917193066 | 0         | 0.000579378 | ECM_GLYCOPROTEINS | 2.640485175 | Inf         |
| <b>ZPLD1</b> | 2.606076277 | 2.231629151 | 5.86E-05  | 2.606076277 | 1.097334  | 5.00E-09    | ECM_GLYCOPROTEINS | 1.167790928 | 2.374916185 |

**Mesothelioma (MESO)**

| Signature genes | Expression in tumor | Expression in rest of Pan-Cancer | P-value     | Expression in tumor | Expression in normal tissue | P-value     | Matrisome category | Fold change vs. Pan-Cancer | Fold change vs. normal |
|-----------------|---------------------|----------------------------------|-------------|---------------------|-----------------------------|-------------|--------------------|----------------------------|------------------------|
| ADAM15          | 12.71979885         | 12.1620167                       | 1.20E-07    | 12.71979885         | 0.83795                     | 3.56E-108   | ECM_REGULATORS     | 1.045862636                | 15.17966329            |
| ADAM19          | 9.450868966         | 9.009334678                      | 0.010872967 | 9.450868966         | 4.969286364                 | 4.37E-122   | ECM_REGULATORS     | 1.049008534                | 1.901856378            |
| ADAM33          | 8.609277011         | 6.07140516                       | 1.88E-24    | 8.609277011         | 2.576570455                 | 2.26E-11    | ECM_REGULATORS     | 1.418004034                | 3.341370695            |
| ADAM8           | 9.494810345         | 8.89876033                       | 0.001737574 | 9.494810345         | 1.253972727                 | 2.87E-35    | ECM_REGULATORS     | 1.066981242                | 7.57178377             |
| ADAM9           | 12.64007816         | 11.80909606                      | 2.64E-09    | 12.64007816         | 4.8283375                   | 1.43E-29    | ECM_REGULATORS     | 1.070367968                | 2.617894495            |
| ADAMTS17        | 7.317745977         | 6.470935793                      | 1.27E-06    | 7.317745977         | 1.917002273                 | 4.62E-100   | ECM_REGULATORS     | 1.130863636                | 3.817286021            |
| ADAMTS2         | 11.86501264         | 9.426232784                      | 5.02E-29    | 11.86501264         | 7.958089773                 | 9.91E-06    | ECM_REGULATORS     | 1.258722643                | 1.49093727             |
| ADAMTS3         | 9.860437931         | 5.811481354                      | 4.18E-91    | 9.860437931         | 2.823254545                 | 0.014977928 | ECM_REGULATORS     | 1.69671678                 | 3.492578431            |
| ADAMTS4         | 9.555248276         | 9.125549438                      | 0.034234549 | 9.555248276         | 0                           | 0.012047317 | ECM_REGULATORS     | 1.047087448                | Inf                    |
| ADAMTS7         | 9.998666667         | 7.996091801                      | 2.33E-35    | 9.998666667         | 1.104234091                 | 5.26E-107   | ECM_REGULATORS     | 1.250444206                | 9.054843306            |
| ADAMTSL1        | 8.364321839         | 6.790864128                      | 3.23E-13    | 8.364321839         | 1.164730682                 | 2.32E-23    | ECM_REGULATORS     | 1.231702134                | 7.181335539            |
| ADAMTSL4        | 11.30261839         | 8.780658761                      | 6.16E-40    | 11.30261839         | 0.429810227                 | 7.70E-14    | ECM_REGULATORS     | 1.287217588                | 26.29676465            |
| AEBP1           | 14.00148276         | 12.78698765                      | 7.08E-09    | 14.00148276         | 11.84688977                 | 7.85E-153   | ECM_GLYCOPROTEINS  | 1.094978985                | 1.181869928            |
| AGRN            | 14.64297931         | 13.31695538                      | 1.15E-21    | 14.64297931         | 5.316565909                 | 1.63E-38    | ECM_GLYCOPROTEINS  | 1.099574107                | 2.754217583            |
| AGRN            | 14.64297931         | 13.31695538                      | 1.15E-21    | 14.64297931         | 5.316565909                 | 1.63E-38    | BASEMENT_MEMBRANES | 1.099574107                | 2.754217583            |
| ANGPTL1         | 7.123282759         | 5.966124566                      | 1.51E-05    | 7.123282759         | 0.705911364                 | 6.83E-19    | SECRETED_FACTORS   | 1.193954749                | 10.09090252            |
| ANGPTL2         | 10.76874598         | 10.36563627                      | 0.03009494  | 10.76874598         | 10.47743068                 | 3.14E-71    | SECRETED_FACTORS   | 1.038889046                | 1.027804078            |
| ANGPTL7         | 3.823086207         | 2.6243956                        | 2.35E-05    | 3.823086207         | 0.365079545                 | 1.94E-93    | SECRETED_FACTORS   | 1.456749206                | 10.47192661            |
| ANXA1           | 13.83164138         | 12.57241633                      | 1.79E-08    | 13.83164138         | 0.224142045                 | 1.25E-43    | ECM_AFFILIATED     | 1.10015776                 | 61.70926722            |
| ANXA11          | 13.52005057         | 12.81794992                      | 2.47E-10    | 13.52005057         | 13.39536591                 | 2.90E-05    | ECM_AFFILIATED     | 1.054774801                | 1.009308045            |
| ANXA2           | 16.29526437         | 14.47993711                      | 1.55E-28    | 16.29526437         | 0.084206818                 | 2.68E-109   | ECM_AFFILIATED     | 1.125368449                | 193.5147856            |
| ANXA3           | 12.32706667         | 9.217102772                      | 6.43E-28    | 12.32706667         | 3.499820455                 | 0.00044701  | ECM_AFFILIATED     | 1.337412305                | 3.522199732            |
| ANXA4           | 12.81105517         | 11.97875792                      | 3.85E-08    | 12.81105517         | 4.551970455                 | 4.37E-86    | ECM_AFFILIATED     | 1.069481098                | 2.814397699            |
| ANXA5           | 13.88917816         | 13.35678082                      | 1.65E-06    | 13.88917816         | 0.076728409                 | 8.46E-67    | ECM_AFFILIATED     | 1.039859705                | 181.0174136            |
| ANXA8           | 13.834              | 5.723261602                      | 8.13E-65    | 13.834              | 8.312913636                 | 1.41E-71    | ECM_AFFILIATED     | 2.417153183                | 1.664157792            |
| ANXA8L1         | 12.90776552         | 5.756162687                      | 2.29E-66    | 12.90776552         | 11.30016023                 | 1.95E-87    | ECM_AFFILIATED     | 2.242425417                | 1.142263938            |
| ANXA9           | 8.140203448         | 7.45056614                       | 0.001683406 | 8.140203448         | 0.125560227                 | 4.13E-104   | ECM_AFFILIATED     | 1.092561732                | 64.83106653            |
| BDNF            | 8.071434483         | 5.172303512                      | 1.87E-38    | 8.071434483         | 2.182115909                 | 0.000229552 | SECRETED_FACTORS   | 1.560510605                | 3.698902725            |
| BGN             | 15.54251954         | 13.17120109                      | 7.92E-29    | 15.54251954         | 5.793145455                 | 7.14E-49    | PROTEOGLYCANS      | 1.180038133                | 2.682915467            |
| BMP1            | 12.32157241         | 10.58460187                      | 2.37E-51    | 12.32157241         | 9.4256625                   | 1.30E-85    | ECM_REGULATORS     | 1.164103531                | 1.30723675             |
| BMP3            | 4.499948276         | 3.732376391                      | 0.027513127 | 4.499948276         | 2.530544318                 | 4.35E-64    | SECRETED_FACTORS   | 1.205652326                | 1.778253099            |
| C1QA            | 13.32276437         | 11.41637434                      | 7.63E-25    | 13.32276437         | 9.521038636                 | 2.63E-25    | ECM_AFFILIATED     | 1.166987344                | 1.399297375            |
| C1QB            | 13.32633678         | 11.58387838                      | 7.86E-19    | 13.32633678         | 11.57160795                 | 1.51E-29    | ECM_AFFILIATED     | 1.150420985                | 1.151640881            |
| C1QC            | 13.15924598         | 11.42031566                      | 4.33E-20    | 13.15924598         | 6.343613636                 | 7.00E-23    | ECM_AFFILIATED     | 1.152266397                | 2.074408489            |
| C1QTNF1         | 11.90692874         | 9.803957695                      | 6.78E-31    | 11.90692874         | 1.214376136                 | 4.59E-49    | ECM_AFFILIATED     | 1.214502256                | 9.804975888            |
| CCBE1           | 6.332402299         | 4.706428443                      | 2.11E-09    | 6.332402299         | 1.862502273                 | 5.34E-07    | SECRETED_FACTORS   | 1.345479353                | 3.399943394            |
| CCL1            | 0.976931034         | 0.637295008                      | 0.002297226 | 0.976931034         | 0.614193182                 | 8.17E-149   | SECRETED_FACTORS   | 1.532933763                | 1.590592445            |
| CCL11           | 5.831643678         | 4.038724862                      | 5.62E-09    | 5.831643678         | 0.786252273                 | 1.29E-43    | SECRETED_FACTORS   | 1.443931904                | 7.417013445            |
| CCL13           | 5.074767816         | 4.445460024                      | 0.026335718 | 5.074767816         | 2.6249875                   | 6.48E-86    | SECRETED_FACTORS   | 1.141561906                | 1.933254088            |
| CCL14           | 7.567655172         | 6.746117157                      | 0.004187745 | 7.567655172         | 3.622790909                 | 5.85E-32    | SECRETED_FACTORS   | 1.121779388                | 2.088901999            |
| CCL2            | 12.26028506         | 9.299596113                      | 6.79E-44    | 12.26028506         | 11.58556477                 | 6.97E-05    | SECRETED_FACTORS   | 1.318367476                | 1.058238014            |

|          |             |             |             |             |             |             |                    |             |             |
|----------|-------------|-------------|-------------|-------------|-------------|-------------|--------------------|-------------|-------------|
| CCL21    | 8.128348276 | 6.936625582 | 0.002239826 | 8.128348276 | 5.462685227 | 1.07E-06    | SECRETED_FACTORS   | 1.171801502 | 1.487976689 |
| CCL3     | 8.845716092 | 7.421448589 | 1.29E-14    | 8.845716092 | 6.340792045 | 2.23E-76    | SECRETED_FACTORS   | 1.191912332 | 1.395049077 |
| CCL4L2   | 7.513467816 | 6.497752723 | 1.32E-06    | 7.513467816 | 7.208472727 | 3.80E-82    | SECRETED_FACTORS   | 1.156317905 | 1.042310639 |
| CCL5     | 10.42524598 | 9.371459816 | 1.38E-06    | 10.42524598 | 9.316761364 | 9.06E-33    | SECRETED_FACTORS   | 1.112446319 | 1.118977461 |
| CD209    | 7.3384      | 6.724245077 | 0.003663645 | 7.3384      | 4.470389773 | 0.005624516 | ECM_AFFILIATED     | 1.091334405 | 1.641557084 |
| CILP     | 9.709352874 | 6.909578285 | 1.24E-17    | 9.709352874 | 0.229773864 | 9.06E-46    | ECM_GLYCOPROTEINS  | 1.405201949 | 42.256124   |
| CILP2    | 9.42836092  | 6.291889828 | 5.25E-31    | 9.42836092  | 3.601670455 | 1.67E-48    | ECM_GLYCOPROTEINS  | 1.49849428  | 2.617774457 |
| CLEC12B  | 2.289172414 | 1.709411602 | 0.001166542 | 2.289172414 | 1.214805682 | 4.66E-15    | ECM_AFFILIATED     | 1.339158112 | 1.884393898 |
| CLEC4A   | 6.9565      | 6.127433465 | 9.38E-10    | 6.9565      | 0.693794318 | 2.85E-24    | ECM_AFFILIATED     | 1.135304045 | 10.02674686 |
| COL10A1  | 8.368842529 | 6.885885606 | 0.000183149 | 8.368842529 | 4.158871591 | 7.79E-26    | COLLAGENS          | 1.21536183  | 2.01228683  |
| COL11A1  | 11.38752299 | 7.376679647 | 8.49E-23    | 11.38752299 | 4.648151136 | 5.67E-100   | COLLAGENS          | 1.543719334 | 2.449903769 |
| COL11A2  | 6.44463908  | 5.977837806 | 0.04487258  | 6.44463908  | 3.157593182 | 4.22E-109   | COLLAGENS          | 1.078088648 | 2.040997275 |
| COL12A1  | 12.97835977 | 11.23249695 | 2.39E-10    | 12.97835977 | 6.947123864 | 2.76E-112   | COLLAGENS          | 1.155429628 | 1.868163002 |
| COL13A1  | 7.132173563 | 6.351330091 | 9.34E-05    | 7.132173563 | 4.500606818 | 0.001629923 | COLLAGENS          | 1.122941724 | 1.584713762 |
| COL14A1  | 11.99126322 | 9.908622593 | 4.46E-19    | 11.99126322 | 0.121203409 | 1.68E-63    | COLLAGENS          | 1.210184676 | 98.93503251 |
| COL15A1  | 11.0362977  | 10.43055367 | 0.010617429 | 11.0362977  | 7.035285227 | 3.76E-72    | COLLAGENS          | 1.058074005 | 1.568706505 |
| COL15A1  | 11.0362977  | 10.43055367 | 0.010617429 | 11.0362977  | 7.035285227 | 3.76E-72    | BASEMENT_MEMBRANES | 1.058074005 | 1.568706505 |
| COL16A1  | 11.69893563 | 10.40352338 | 6.03E-10    | 11.69893563 | 2.086480682 | 1.74E-107   | COLLAGENS          | 1.124516686 | 5.607018428 |
| COL18A1  | 14.02407701 | 12.86523985 | 3.82E-13    | 14.02407701 | 4.852423864 | 4.68E-70    | COLLAGENS          | 1.090075053 | 2.890117889 |
| COL18A1  | 14.02407701 | 12.86523985 | 3.82E-13    | 14.02407701 | 4.852423864 | 4.68E-70    | BASEMENT_MEMBRANES | 1.090075053 | 2.890117889 |
| COL1A1   | 18.11817471 | 14.62013411 | 5.34E-27    | 18.11817471 | 5.928756818 | 2.31E-145   | COLLAGENS          | 1.239261869 | 3.0559821   |
| COL1A2   | 17.09245057 | 14.38451312 | 4.69E-22    | 17.09245057 | 7.728581818 | 7.33E-73    | COLLAGENS          | 1.188253675 | 2.211589523 |
| COL21A1  | 6.592688506 | 6.098003966 | 0.036863303 | 6.592688506 | 5.823370455 | 8.86E-59    | COLLAGENS          | 1.081122371 | 1.132108726 |
| COL3A1   | 17.24964253 | 14.15126581 | 2.51E-23    | 17.24964253 | 4.069794318 | 3.19E-21    | COLLAGENS          | 1.218946966 | 4.238455602 |
| COL4A2   | 13.92467816 | 13.39872327 | 0.007080911 | 13.92467816 | 5.313918182 | 5.05E-11    | COLLAGENS          | 1.039254105 | 2.620416364 |
| COL4A2   | 13.92467816 | 13.39872327 | 0.007080911 | 13.92467816 | 5.313918182 | 5.05E-11    | BASEMENT_MEMBRANES | 1.039254105 | 2.620416364 |
| COL4A5   | 11.00118851 | 9.299093587 | 9.38E-12    | 11.00118851 | 6.1588875   | 8.94E-25    | COLLAGENS          | 1.183038799 | 1.786229819 |
| COL4A5   | 11.00118851 | 9.299093587 | 9.38E-12    | 11.00118851 | 6.1588875   | 8.94E-25    | BASEMENT_MEMBRANES | 1.183038799 | 1.786229819 |
| COL4A6   | 8.278477011 | 6.169130328 | 6.40E-11    | 8.278477011 | 4.933819318 | 2.11E-13    | COLLAGENS          | 1.341919618 | 1.677904373 |
| COL4A6   | 8.278477011 | 6.169130328 | 6.40E-11    | 8.278477011 | 4.933819318 | 2.11E-13    | BASEMENT_MEMBRANES | 1.341919618 | 1.677904373 |
| COL5A1   | 14.43998736 | 11.71228787 | 2.38E-26    | 14.43998736 | 12.67630568 | 8.01E-47    | COLLAGENS          | 1.232892115 | 1.139132151 |
| COL5A2   | 13.6010931  | 11.41711507 | 1.21E-20    | 13.6010931  | 6.819744318 | 2.56E-95    | COLLAGENS          | 1.191289833 | 1.994369945 |
| COL5A3   | 10.30551494 | 9.395735251 | 3.53E-06    | 10.30551494 | 5.696418182 | 3.91E-39    | COLLAGENS          | 1.096829005 | 1.80912191  |
| COL6A1   | 15.76334943 | 13.11534005 | 4.42E-50    | 15.76334943 | 14.33658523 | 5.87E-75    | BASEMENT_MEMBRANES | 1.201901695 | 1.09951911  |
| COL6A1   | 15.76334943 | 13.11534005 | 4.42E-50    | 15.76334943 | 14.33658523 | 5.87E-75    | COLLAGENS          | 1.201901695 | 1.09951911  |
| COL6A2   | 15.75881034 | 13.17268439 | 7.11E-34    | 15.75881034 | 11.82396818 | 4.08E-92    | COLLAGENS          | 1.1963249   | 1.332785246 |
| COL6A2   | 15.75881034 | 13.17268439 | 7.11E-34    | 15.75881034 | 11.82396818 | 4.08E-92    | BASEMENT_MEMBRANES | 1.1963249   | 1.332785246 |
| COL6A3   | 14.27122414 | 12.53777336 | 2.69E-09    | 14.27122414 | 12.88514318 | 2.37E-55    | COLLAGENS          | 1.138258264 | 1.107572026 |
| COL6A3   | 14.27122414 | 12.53777336 | 2.69E-09    | 14.27122414 | 12.88514318 | 2.37E-55    | BASEMENT_MEMBRANES | 1.138258264 | 1.107572026 |
| COL8A1   | 11.92575287 | 9.753171152 | 2.99E-14    | 11.92575287 | 10.4492     | 3.67E-49    | COLLAGENS          | 1.222756444 | 1.141307744 |
| COMP     | 9.762024138 | 7.228315785 | 4.43E-10    | 9.762024138 | 8.0084125   | 2.41E-95    | ECM_GLYCOPROTEINS  | 1.35052541  | 1.218971193 |
| CRELD1   | 10.73991609 | 10.24479204 | 1.97E-07    | 10.73991609 | 6.756992045 | 3.03E-67    | ECM_GLYCOPROTEINS  | 1.048329342 | 1.589452233 |
| CRIM1    | 13.66764713 | 11.35632036 | 1.01E-55    | 13.66764713 | 0.195836364 | 7.59E-190   | ECM_GLYCOPROTEINS  | 1.203527788 | 69.79116071 |
| CRISPLD1 | 9.351166667 | 8.091082074 | 3.19E-07    | 9.351166667 | 6.08975     | 2.12E-11    | ECM_GLYCOPROTEINS  | 1.155737463 | 1.535558384 |
| CRLF1    | 7.6224      | 7.088001401 | 0.01984563  | 7.6224      | 6.768884091 | 2.11E-92    | SECRETED_FACTORS   | 1.075394821 | 1.126094035 |
| CSF1     | 12.28516092 | 10.54940643 | 5.40E-38    | 12.28516092 | 1.706475    | 2.73E-05    | SECRETED_FACTORS   | 1.164535749 | 7.199144974 |

|        |             |             |             |             |             |            |                    |             |             |
|--------|-------------|-------------|-------------|-------------|-------------|------------|--------------------|-------------|-------------|
| CST7   | 7.777955172 | 7.028249852 | 0.000407107 | 7.777955172 | 5.448784091 | 1.44E-105  | ECM_REGULATORS     | 1.106670272 | 1.427466209 |
| CTGF   | 12.65613793 | 11.95918097 | 0.000838164 | 12.65613793 | 0.140071591 | 3.56E-19   | ECM_GLYCOPROTEINS  | 1.058277984 | 90.35478107 |
| CTHRC1 | 10.84582989 | 9.016966032 | 2.02E-11    | 10.84582989 | 7.952111364 | 1.29E-88   | ECM_GLYCOPROTEINS  | 1.202824747 | 1.363893108 |
| CTSF   | 11.42059425 | 10.89944704 | 0.001726588 | 11.42059425 | 4.0361375   | 6.26E-103  | ECM_REGULATORS     | 1.047814097 | 2.829585031 |
| CTSK   | 11.2007908  | 10.30976458 | 4.69E-05    | 11.2007908  | 1.001173864 | 4.17E-16   | ECM_REGULATORS     | 1.086425467 | 11.18765802 |
| CTSL   | 12.86513793 | 11.83880246 | 1.28E-14    | 12.86513793 | 0.687885227 | 2.70E-22   | ECM_REGULATORS     | 1.086692508 | 18.70244835 |
| CTSZ   | 13.53369425 | 12.82270553 | 1.95E-09    | 13.53369425 | 6.65405     | 5.59E-139  | ECM_REGULATORS     | 1.055447637 | 2.0339033   |
| CXCL6  | 6.151895402 | 4.550276884 | 5.00E-06    | 6.151895402 | 0.363067045 | 1.38E-50   | SECRETED_FACTORS   | 1.35198265  | 16.94424068 |
| CYR61  | 13.13840805 | 11.49950018 | 2.23E-14    | 13.13840805 | 10.858025   | 4.72E-27   | ECM_GLYCOPROTEINS  | 1.142519922 | 1.210018217 |
| DCN    | 14.29005747 | 11.96756789 | 2.19E-16    | 14.29005747 | 8.570943182 | 4.79E-125  | PROTEOGLYCANS      | 1.194065294 | 1.667267787 |
| DDX26B | 9.298098851 | 8.155626825 | 2.01E-16    | 9.298098851 | 1.648797727 | 3.52E-93   | ECM_GLYCOPROTEINS  | 1.140083902 | 5.639320516 |
| DPT    | 8.139389655 | 6.713021369 | 6.08E-05    | 8.139389655 | 7.7318875   | 1.24E-70   | ECM_GLYCOPROTEINS  | 1.212477841 | 1.052704098 |
| EBI3   | 7.126397701 | 6.0419632   | 1.51E-10    | 7.126397701 | 1.269811364 | 9.26E-07   | SECRETED_FACTORS   | 1.179483798 | 5.612170363 |
| ECM2   | 9.315887356 | 8.08043748  | 5.10E-11    | 9.315887356 | 7.371207955 | 4.82E-100  | ECM_GLYCOPROTEINS  | 1.152893934 | 1.263820993 |
| EDIL3  | 10.83222414 | 9.241769376 | 3.95E-11    | 10.83222414 | 9.7754875   | 7.38E-14   | ECM_GLYCOPROTEINS  | 1.172094184 | 1.108100659 |
| EFEMP1 | 15.31970575 | 10.41146057 | 2.00E-83    | 15.31970575 | 7.888103409 | 3.94E-144  | ECM_GLYCOPROTEINS  | 1.47142715  | 1.942127905 |
| EFEMP2 | 12.85555402 | 10.38304768 | 3.93E-55    | 12.85555402 | 3.0062375   | 1.25E-81   | ECM_GLYCOPROTEINS  | 1.238129152 | 4.276293547 |
| EGFLAM | 8.055070115 | 7.591237816 | 0.014406632 | 8.055070115 | 6.383727273 | 0.01132365 | ECM_GLYCOPROTEINS  | 1.06110101  | 1.261813008 |
| EGLN1  | 11.41983908 | 11.21746294 | 0.012667456 | 11.41983908 | 7.600998864 | 2.19E-90   | ECM_REGULATORS     | 1.018041168 | 1.502412944 |
| EGLN2  | 12.07905747 | 11.41629852 | 1.71E-20    | 12.07905747 | 9.702230682 | 1.64E-23   | ECM_REGULATORS     | 1.058053751 | 1.244977353 |
| ELN    | 11.20726782 | 9.982076421 | 3.58E-07    | 11.20726782 | 10.14081705 | 5.99E-71   | ECM_GLYCOPROTEINS  | 1.122739132 | 1.105164186 |
| EPYC   | 5.831597701 | 2.525688802 | 2.20E-28    | 5.831597701 | 1.913973864 | 5.18E-73   | PROTEOGLYCANS      | 2.308913789 | 3.046853362 |
| F13A1  | 11.38796437 | 9.151014296 | 1.38E-23    | 11.38796437 | 10.69367727 | 7.65E-47   | ECM_REGULATORS     | 1.24444832  | 1.064925009 |
| F7     | 4.745442529 | 3.88701325  | 0.007710956 | 4.745442529 | 0.098905682 | 3.29E-81   | ECM_REGULATORS     | 1.220845473 | 47.97947339 |
| FAM20A | 10.9235092  | 8.5285566   | 4.73E-25    | 10.9235092  | 5.639498864 | 2.30E-40   | ECM_REGULATORS     | 1.2808157   | 1.936964518 |
| FAM20B | 11.75446437 | 11.29748278 | 2.19E-11    | 11.75446437 | 1.810592045 | 7.04E-14   | ECM_REGULATORS     | 1.040449859 | 6.492055677 |
| FAM20C | 11.55032069 | 10.6391928  | 2.78E-10    | 11.55032069 | 2.013855682 | 1.46E-114  | ECM_REGULATORS     | 1.085638818 | 5.735426224 |
| FBLN1  | 13.02265287 | 11.54336361 | 5.27E-09    | 13.02265287 | 5.178522727 | 1.61E-08   | ECM_GLYCOPROTEINS  | 1.128150625 | 2.514742825 |
| FBLN5  | 10.33012069 | 9.870161158 | 0.013194561 | 10.33012069 | 8.263398864 | 3.70E-130  | ECM_GLYCOPROTEINS  | 1.046601015 | 1.250105539 |
| FCN1   | 7.720111494 | 6.375246369 | 1.27E-08    | 7.720111494 | 4.508817045 | 2.34E-74   | ECM_AFFILIATED     | 1.210951083 | 1.712225494 |
| FGF1   | 7.973445977 | 7.14805734  | 0.002752051 | 7.973445977 | 4.498592045 | 7.26E-85   | SECRETED_FACTORS   | 1.115470344 | 1.77243144  |
| FGF2   | 9.142921839 | 7.775464473 | 8.54E-10    | 9.142921839 | 0.318039773 | 3.31E-93   | SECRETED_FACTORS   | 1.175868255 | 28.74773102 |
| FGL2   | 10.1488069  | 9.575530002 | 0.001971321 | 10.1488069  | 0.014686364 | 2.81E-35   | ECM_GLYCOPROTEINS  | 1.059868947 | 691.0360623 |
| FMOD   | 12.42850575 | 10.31520491 | 5.77E-17    | 12.42850575 | 6.794548864 | 2.10E-36   | PROTEOGLYCANS      | 1.204872405 | 1.829187779 |
| FN1    | 16.35575517 | 15.10008369 | 6.85E-07    | 16.35575517 | 3.210990909 | 5.44E-27   | ECM_GLYCOPROTEINS  | 1.083156591 | 5.093678442 |
| FNDC1  | 11.02737931 | 8.123307567 | 2.42E-18    | 11.02737931 | 0.142098864 | 1.70E-83   | ECM_GLYCOPROTEINS  | 1.357498681 | 77.6035714  |
| FRAS1  | 11.67537471 | 8.373052279 | 4.29E-35    | 11.67537471 | 8.400604545 | 9.67E-97   | ECM_GLYCOPROTEINS  | 1.394398879 | 1.389825536 |
| GAS6   | 13.57455517 | 11.69314578 | 1.55E-34    | 13.57455517 | 7.357082955 | 2.46E-184  | ECM_GLYCOPROTEINS  | 1.160898481 | 1.845100192 |
| GPC6   | 9.426437931 | 8.393325049 | 1.56E-05    | 9.426437931 | 2.636935227 | 6.17E-11   | ECM_AFFILIATED     | 1.123087439 | 3.574770375 |
| HAPLN3 | 9.346833333 | 8.507890854 | 1.20E-05    | 9.346833333 | 8.379421591 | 1.21E-05   | PROTEOGLYCANS      | 1.098607574 | 1.115450897 |
| HSPG2  | 13.77207356 | 13.33531073 | 0.005933004 | 13.77207356 | 3.715952273 | 6.69E-54   | PROTEOGLYCANS      | 1.032752355 | 3.706203027 |
| HSPG2  | 13.77207356 | 13.33531073 | 0.005933004 | 13.77207356 | 3.715952273 | 6.69E-54   | BASEMENT_MEMBRANES | 1.032752355 | 3.706203027 |
| HTRA1  | 13.81848851 | 11.76162011 | 4.73E-25    | 13.81848851 | 4.689118182 | 1.65E-72   | ECM_REGULATORS     | 1.174879683 | 2.9469269   |
| HTRA4  | 5.671916092 | 3.38490515  | 1.70E-28    | 5.671916092 | 1.250257955 | 1.17E-62   | ECM_REGULATORS     | 1.675649934 | 4.536596685 |
| IBSP   | 4.599722989 | 3.259130357 | 1.93E-06    | 4.599722989 | 3.661544318 | 3.75E-09   | ECM_GLYCOPROTEINS  | 1.411334462 | 1.256224857 |
| IGFBP2 | 12.52543563 | 11.58790818 | 0.000202354 | 12.52543563 | 3.308595455 | 1.84E-36   | ECM_GLYCOPROTEINS  | 1.080905668 | 3.785725938 |

|         |             |             |             |             |             |             |                    |             |             |
|---------|-------------|-------------|-------------|-------------|-------------|-------------|--------------------|-------------|-------------|
| IGFBP4  | 14.73150575 | 13.41177671 | 3.66E-12    | 14.73150575 | 12.13285568 | 2.39E-167   | ECM_GLYCOPROTEINS  | 1.098400761 | 1.214182888 |
| IGFBP5  | 14.08746782 | 13.2982347  | 0.001315802 | 14.08746782 | 0.933857955 | 2.22E-85    | ECM_GLYCOPROTEINS  | 1.059348713 | 15.08523619 |
| ITIH3   | 5.991982759 | 5.105618104 | 0.00363797  | 5.991982759 | 0.263054545 | 3.96E-46    | ECM_REGULATORS     | 1.173605749 | 22.77848021 |
| ITLN1   | 14.82886667 | 2.786346429 | 4.49E-293   | 14.82886667 | 10.01529432 | 4.30E-77    | ECM_AFFILIATED     | 5.321975227 | 1.480622156 |
| ITLN2   | 9.374154023 | 1.992356215 | 2.40E-184   | 9.374154023 | 2.077495455 | 3.55E-85    | ECM_AFFILIATED     | 4.705059241 | 4.512238042 |
| LAMA4   | 12.55048506 | 10.84677364 | 8.63E-21    | 12.55048506 | 4.796089773 | 2.04E-16    | ECM_GLYCOPROTEINS  | 1.157070801 | 2.616816126 |
| LAMA4   | 12.55048506 | 10.84677364 | 8.63E-21    | 12.55048506 | 4.796089773 | 2.04E-16    | BASEMENT_MEMBRANES | 1.157070801 | 2.616816126 |
| LAMA5   | 13.50438276 | 12.33664821 | 1.76E-14    | 13.50438276 | 5.271243182 | 1.29E-63    | BASEMENT_MEMBRANES | 1.094655738 | 2.561897126 |
| LAMA5   | 13.50438276 | 12.33664821 | 1.76E-14    | 13.50438276 | 5.271243182 | 1.29E-63    | ECM_GLYCOPROTEINS  | 1.094655738 | 2.561897126 |
| LAMB1   | 13.53588966 | 12.18350672 | 2.15E-14    | 13.53588966 | 6.506263636 | 1.60E-48    | ECM_GLYCOPROTEINS  | 1.111001124 | 2.080439775 |
| LAMB1   | 13.53588966 | 12.18350672 | 2.15E-14    | 13.53588966 | 6.506263636 | 1.60E-48    | BASEMENT_MEMBRANES | 1.111001124 | 2.080439775 |
| LAMB2   | 13.49917586 | 12.68118825 | 9.29E-10    | 13.49917586 | 6.199969318 | 1.06E-42    | BASEMENT_MEMBRANES | 1.064504019 | 2.177297204 |
| LAMB2   | 13.49917586 | 12.68118825 | 9.29E-10    | 13.49917586 | 6.199969318 | 1.06E-42    | ECM_GLYCOPROTEINS  | 1.064504019 | 2.177297204 |
| LAMC1   | 13.68217931 | 12.75481789 | 5.24E-11    | 13.68217931 | 1.8319125   | 1.98E-90    | ECM_GLYCOPROTEINS  | 1.072706755 | 7.468795213 |
| LAMC1   | 13.68217931 | 12.75481789 | 5.24E-11    | 13.68217931 | 1.8319125   | 1.98E-90    | BASEMENT_MEMBRANES | 1.072706755 | 7.468795213 |
| LAMC2   | 11.86013908 | 10.1747368  | 6.32E-05    | 11.86013908 | 3.909002273 | 2.78E-39    | ECM_GLYCOPROTEINS  | 1.165645787 | 3.034057863 |
| LAMC2   | 11.86013908 | 10.1747368  | 6.32E-05    | 11.86013908 | 3.909002273 | 2.78E-39    | BASEMENT_MEMBRANES | 1.165645787 | 3.034057863 |
| LGALS1  | 14.11412644 | 12.62419549 | 6.71E-24    | 14.11412644 | 9.332195455 | 1.17E-116   | ECM_AFFILIATED     | 1.118021853 | 1.512412219 |
| LGALS12 | 6.720454023 | 3.081854844 | 8.68E-48    | 6.720454023 | 0.125365909 | 8.96E-71    | ECM_AFFILIATED     | 2.180652355 | 53.60671072 |
| LOX     | 12.35414943 | 9.449353137 | 1.85E-38    | 12.35414943 | 1.688184091 | 1.35E-130   | ECM_REGULATORS     | 1.307406893 | 7.318010809 |
| LOXL1   | 11.35404023 | 9.147083573 | 1.45E-26    | 11.35404023 | 9.193948864 | 3.39E-151   | ECM_REGULATORS     | 1.241274351 | 1.234947072 |
| LOXL2   | 11.55769195 | 10.10354265 | 3.64E-15    | 11.55769195 | 1.558902273 | 7.57E-136   | ECM_REGULATORS     | 1.143924696 | 7.413993909 |
| LOXL4   | 8.863649425 | 7.786948204 | 1.68E-05    | 8.863649425 | 2.124920455 | 4.24E-207   | ECM_REGULATORS     | 1.138269986 | 4.171285286 |
| LTBP2   | 12.68084943 | 11.22602588 | 2.10E-12    | 12.68084943 | 6.822564773 | 7.59E-188   | ECM_GLYCOPROTEINS  | 1.129593817 | 1.858663105 |
| LTBP3   | 13.21348276 | 12.14308736 | 4.03E-16    | 13.21348276 | 9.146761364 | 2.53E-102   | ECM_GLYCOPROTEINS  | 1.088148538 | 1.444607794 |
| LTBP4   | 12.51565632 | 11.52975097 | 8.69E-10    | 12.51565632 | 1.134201136 | 1.97E-28    | ECM_GLYCOPROTEINS  | 1.085509683 | 11.03477674 |
| LUM     | 13.90188621 | 11.57994423 | 3.72E-12    | 13.90188621 | 10.18142727 | 2.77E-129   | PROTEOGLYCANS      | 1.20051409  | 1.365416246 |
| MATN2   | 11.84732069 | 10.27346922 | 7.09E-16    | 11.84732069 | 3.5017      | 1.74E-214   | ECM_GLYCOPROTEINS  | 1.153195716 | 3.383305449 |
| MFAP2   | 11.51305862 | 9.030276431 | 1.06E-17    | 11.51305862 | 1.199613636 | 4.29E-46    | ECM_GLYCOPROTEINS  | 1.274939777 | 9.597305559 |
| MFAP4   | 11.16551954 | 9.690583159 | 1.88E-08    | 11.16551954 | 5.583082955 | 1.16E-18    | ECM_GLYCOPROTEINS  | 1.152203057 | 1.999884227 |
| MFAP5   | 9.809078161 | 6.666390677 | 3.74E-19    | 9.809078161 | 7.282652273 | 2.10E-72    | ECM_GLYCOPROTEINS  | 1.471422639 | 1.346910136 |
| MGP     | 13.09517586 | 11.79634638 | 4.71E-06    | 13.09517586 | 9.700438636 | 4.87E-12    | ECM_GLYCOPROTEINS  | 1.110104387 | 1.349957085 |
| MMP14   | 14.65203678 | 12.86918534 | 1.56E-22    | 14.65203678 | 4.339971591 | 2.77E-66    | ECM_REGULATORS     | 1.138536465 | 3.376067441 |
| MMP15   | 11.65534713 | 10.81978352 | 2.77E-07    | 11.65534713 | 4.612923864 | 7.05E-103   | ECM_REGULATORS     | 1.077225538 | 2.526672339 |
| MMP16   | 7.988442529 | 6.777905624 | 1.41E-05    | 7.988442529 | 0.242132955 | 5.95E-79    | ECM_REGULATORS     | 1.178600437 | 32.99196734 |
| MMP19   | 9.386417241 | 7.922748925 | 1.65E-15    | 9.386417241 | 9.199939773 | 0.001024833 | ECM_REGULATORS     | 1.184742484 | 1.020269423 |
| MMP2    | 13.74835632 | 12.20003146 | 2.90E-13    | 13.74835632 | 11.88949318 | 2.24E-123   | ECM_REGULATORS     | 1.126911546 | 1.156345028 |
| MMP23B  | 8.9408      | 5.775458603 | 3.14E-63    | 8.9408      | 2.105089773 | 8.84E-05    | ECM_REGULATORS     | 1.548067541 | 4.247229793 |
| MMP24   | 11.48173793 | 6.957151529 | 1.13E-67    | 11.48173793 | 0.241529545 | 1.52E-119   | ECM_REGULATORS     | 1.650350418 | 47.53761247 |
| MMRN2   | 10.34814483 | 9.701514246 | 3.47E-05    | 10.34814483 | 4.095342045 | 2.55E-76    | ECM_GLYCOPROTEINS  | 1.066652542 | 2.526808436 |
| MUC12   | 6.228290805 | 5.014356679 | 0.000241394 | 6.228290805 | 3.365229545 | 6.76E-115   | ECM_AFFILIATED     | 1.242091699 | 1.850777405 |
| MUC16   | 9.814417241 | 5.366460468 | 2.95E-22    | 9.814417241 | 3.793965909 | 5.11E-12    | ECM_AFFILIATED     | 1.828843667 | 2.586849085 |
| MXRA5   | 13.37446552 | 10.98854985 | 1.62E-18    | 13.37446552 | 2.138310227 | 2.32E-22    | ECM_GLYCOPROTEINS  | 1.217127437 | 6.254689028 |
| NGLY1   | 10.21227471 | 9.973720018 | 0.000142784 | 10.21227471 | 7.918786364 | 5.30E-62    | ECM_REGULATORS     | 1.023918327 | 1.289626244 |
| NID2    | 9.585683908 | 9.147420373 | 0.033383755 | 9.585683908 | 7.775701136 | 5.06E-144   | ECM_GLYCOPROTEINS  | 1.047911162 | 1.232774221 |
| NID2    | 9.585683908 | 9.147420373 | 0.033383755 | 9.585683908 | 7.775701136 | 5.06E-144   | BASEMENT_MEMBRANES | 1.047911162 | 1.232774221 |



|          |             |             |             |             |             |             |                    |             |             |
|----------|-------------|-------------|-------------|-------------|-------------|-------------|--------------------|-------------|-------------|
| NPNT     | 12.00386552 | 10.22070788 | 7.51E-10    | 12.00386552 | 7.904952273 | 1.10E-14    | BASEMENT_MEMBRANES | 1.174465179 | 1.51852473  |
| NPNT     | 12.00386552 | 10.22070788 | 7.51E-10    | 12.00386552 | 7.904952273 | 1.10E-14    | ECM_GLYCOPROTEINS  | 1.174465179 | 1.51852473  |
| NTN1     | 9.499257471 | 8.409457429 | 1.84E-05    | 9.499257471 | 9.140754545 | 1.38E-34    | ECM_GLYCOPROTEINS  | 1.129592194 | 1.039220277 |
| NTN1     | 9.499257471 | 8.409457429 | 1.84E-05    | 9.499257471 | 9.140754545 | 1.38E-34    | BASEMENT_MEMBRANES | 1.129592194 | 1.039220277 |
| NTNG1    | 8.503358621 | 4.205837165 | 2.19E-41    | 8.503358621 | 2.505509091 | 1.48E-115   | ECM_GLYCOPROTEINS  | 2.021799297 | 3.393864605 |
| NTNG1    | 8.503358621 | 4.205837165 | 2.19E-41    | 8.503358621 | 2.505509091 | 1.48E-115   | BASEMENT_MEMBRANES | 2.021799297 | 3.393864605 |
| OGFOD1   | 10.75006782 | 10.46929272 | 1.45E-07    | 10.75006782 | 2.750610227 | 4.89E-21    | ECM_REGULATORS     | 1.026818917 | 3.908248326 |
| OGN      | 10.37584138 | 6.087930929 | 1.94E-35    | 10.37584138 | 7.816123864 | 8.43E-22    | PROTEOGLYCANS      | 1.704329681 | 1.327491933 |
| OIT3     | 3.852302299 | 3.291471675 | 0.026687521 | 3.852302299 | 0.97745     | 6.62E-22    | ECM_GLYCOPROTEINS  | 1.170389017 | 3.941175813 |
| P4HA1    | 12.04572644 | 11.1256326  | 6.33E-18    | 12.04572644 | 11.69698409 | 9.18E-156   | ECM_REGULATORS     | 1.082700362 | 1.029814723 |
| P4HTM    | 10.83038621 | 10.31171631 | 0.000229574 | 10.83038621 | 9.048806818 | 8.07E-59    | ECM_REGULATORS     | 1.050299085 | 1.196885559 |
| PCOLCE   | 13.57034598 | 10.49021485 | 5.69E-63    | 13.57034598 | 0.029690909 | 0.00134824  | ECM_GLYCOPROTEINS  | 1.293619451 | 457.0539061 |
| PLAU     | 11.70922989 | 10.56399114 | 4.76E-07    | 11.70922989 | 11.31137727 | 5.73E-15    | ECM_REGULATORS     | 1.108409665 | 1.035172782 |
| PLOD1    | 12.85816782 | 12.48732833 | 0.000293399 | 12.85816782 | 11.82298409 | 4.19E-33    | ECM_REGULATORS     | 1.029697264 | 1.087556891 |
| PLOD2    | 13.60498276 | 11.12241915 | 1.63E-37    | 13.60498276 | 12.19945    | 4.93E-38    | ECM_REGULATORS     | 1.223203565 | 1.115212797 |
| PLXDC2   | 13.07348621 | 10.86537647 | 1.14E-37    | 13.07348621 | 0.061589773 | 2.40E-119   | ECM_AFFILIATED     | 1.203224411 | 212.2671611 |
| PLXNA1   | 12.09596322 | 11.50490271 | 1.83E-05    | 12.09596322 | 5.021021591 | 8.22E-18    | ECM_AFFILIATED     | 1.051374663 | 2.409064171 |
| PLXNA2   | 11.24911149 | 10.52806114 | 2.63E-07    | 11.24911149 | 3.247742045 | 2.87E-18    | ECM_AFFILIATED     | 1.068488428 | 3.463671479 |
| PODN     | 11.19254023 | 8.873205929 | 3.01E-22    | 11.19254023 | 8.389872727 | 1.45E-182   | PROTEOGLYCANS      | 1.261386281 | 1.334053637 |
| PODNL1   | 8.048456322 | 6.619169051 | 1.34E-09    | 8.048456322 | 4.977126136 | 2.30E-75    | PROTEOGLYCANS      | 1.215931526 | 1.617089079 |
| POMZP3   | 9.273391954 | 8.760404765 | 3.23E-07    | 9.273391954 | 1.451835227 | 3.05E-135   | ECM_GLYCOPROTEINS  | 1.058557476 | 6.387358414 |
| POSTN    | 12.90072414 | 10.78360275 | 1.59E-08    | 12.90072414 | 8.4119375   | 1.89E-79    | ECM_GLYCOPROTEINS  | 1.196327835 | 1.533621016 |
| PRG2     | 2.845818391 | 1.924254963 | 8.07E-06    | 2.845818391 | 0.027786364 | 5.15E-19    | PROTEOGLYCANS      | 1.478919606 | 102.4178057 |
| PRG4     | 13.71763908 | 4.920917463 | 2.07E-161   | 13.71763908 | 0.0715      | 2.05E-54    | PROTEOGLYCANS      | 2.7876182   | 191.855092  |
| PXDN     | 12.94000575 | 11.20015499 | 2.27E-19    | 12.94000575 | 0.502647727 | 3.58E-195   | ECM_GLYCOPROTEINS  | 1.155341668 | 25.74368697 |
| RSPO1    | 10.59541379 | 3.309434964 | 3.23E-137   | 10.59541379 | 1.812540909 | 9.86E-51    | ECM_GLYCOPROTEINS  | 3.201577885 | 5.845613602 |
| RSPO2    | 3.275208046 | 2.629827457 | 0.026511173 | 3.275208046 | 2.923955682 | 2.56E-08    | ECM_GLYCOPROTEINS  | 1.245407959 | 1.120129168 |
| RSPO4    | 5.333187356 | 4.21821029  | 0.000163598 | 5.333187356 | 1.403763636 | 3.21E-67    | ECM_GLYCOPROTEINS  | 1.264324676 | 3.79920609  |
| SBSPON   | 10.08631494 | 7.103059767 | 3.53E-37    | 10.08631494 | 8.265506818 | 2.85E-32    | ECM_GLYCOPROTEINS  | 1.419995787 | 1.220289955 |
| SEMA3B   | 12.44383678 | 9.540702269 | 1.95E-41    | 12.44383678 | 4.055819318 | 8.92E-50    | ECM_AFFILIATED     | 1.304289394 | 3.068143772 |
| SEMA3C   | 13.34428621 | 10.02105688 | 4.38E-33    | 13.34428621 | 0.316580682 | 1.87E-119   | ECM_AFFILIATED     | 1.331624635 | 42.15129657 |
| SEMA3D   | 7.090629885 | 6.29984337  | 0.004607781 | 7.090629885 | 1.392293182 | 3.55E-63    | ECM_AFFILIATED     | 1.12552479  | 5.092770673 |
| SEMA4C   | 11.23955517 | 10.76626554 | 2.03E-06    | 11.23955517 | 7.172706818 | 0.001276973 | ECM_AFFILIATED     | 1.043960427 | 1.566989347 |
| SEMA4D   | 10.94853908 | 10.46967319 | 5.50E-05    | 10.94853908 | 1.698551136 | 3.16E-103   | ECM_AFFILIATED     | 1.04573838  | 6.445810695 |
| SEMA4F   | 8.949625287 | 8.683718804 | 0.013778805 | 8.949625287 | 8.810028409 | 7.64E-97    | ECM_AFFILIATED     | 1.030621268 | 1.015845225 |
| SEMA5A   | 11.54457241 | 9.713686415 | 3.94E-17    | 11.54457241 | 6.311929545 | 1.41E-154   | ECM_AFFILIATED     | 1.188485187 | 1.82900844  |
| SEMA6D   | 8.458024138 | 7.753381778 | 0.002122948 | 8.458024138 | 2.064331818 | 1.30E-73    | ECM_AFFILIATED     | 1.090881938 | 4.097221224 |
| SERPINB1 | 12.05479195 | 11.57368539 | 0.002432743 | 12.05479195 | 6.3805125   | 6.64E-103   | ECM_REGULATORS     | 1.041569003 | 1.889314057 |
| SERPINB6 | 12.13586552 | 11.87827023 | 0.009026437 | 12.13586552 | 1.951163636 | 1.41E-21    | ECM_REGULATORS     | 1.021686262 | 6.21980919  |
| SERPINB7 | 7.31267931  | 3.192043903 | 2.89E-33    | 7.31267931  | 0.551915909 | 6.73E-05    | ECM_REGULATORS     | 2.290908124 | 13.24962588 |
| SERPINB8 | 9.453072414 | 8.783433268 | 2.86E-07    | 9.453072414 | 6.214178409 | 9.21E-13    | ECM_REGULATORS     | 1.076238884 | 1.521210334 |
| SERPINB9 | 10.92015747 | 9.2790309   | 5.37E-31    | 10.92015747 | 6.230551136 | 5.93E-26    | ECM_REGULATORS     | 1.176864005 | 1.752679214 |
| SERPINE1 | 12.62652414 | 10.72367076 | 2.38E-15    | 12.62652414 | 4.090814773 | 6.38E-53    | ECM_REGULATORS     | 1.177444219 | 3.08655484  |
| SERPINE2 | 11.42031609 | 10.72609572 | 0.005717899 | 11.42031609 | 8.017265909 | 2.67E-53    | ECM_REGULATORS     | 1.06472256  | 1.424465176 |
| SERPING1 | 14.91494138 | 12.87465213 | 6.11E-26    | 14.91494138 | 10.41882273 | 3.33E-87    | ECM_REGULATORS     | 1.15847335  | 1.43153807  |
| SERPINH1 | 14.72437011 | 12.62998523 | 3.13E-47    | 14.72437011 | 5.440107955 | 7.48E-80    | ECM_REGULATORS     | 1.165826392 | 2.706631971 |

|        |             |             |             |             |             |             |                   |             |             |
|--------|-------------|-------------|-------------|-------------|-------------|-------------|-------------------|-------------|-------------|
| SLIT2  | 10.58404138 | 8.224777841 | 3.30E-24    | 10.58404138 | 3.686559091 | 6.52E-12    | ECM_GLYCOPROTEINS | 1.2868483   | 2.870981074 |
| SLIT3  | 12.37143678 | 9.665665647 | 6.19E-28    | 12.37143678 | 1.751048864 | 0.001159739 | ECM_GLYCOPROTEINS | 1.279936347 | 7.06515794  |
| SMOC2  | 11.02795057 | 9.329549546 | 3.65E-12    | 11.02795057 | 7.158918182 | 6.19E-90    | ECM_GLYCOPROTEINS | 1.182045341 | 1.54044931  |
| SPARC  | 16.96448851 | 15.0976259  | 1.40E-27    | 16.96448851 | 6.178789773 | 3.13E-132   | ECM_GLYCOPROTEINS | 1.123652727 | 2.745600535 |
| SPOCK1 | 10.04520345 | 9.29634631  | 0.012344158 | 10.04520345 | 0.083861364 | 3.11E-59    | PROTEOGLYCANS     | 1.08055392  | 119.7834499 |
| SPOCK2 | 14.0195977  | 10.6692275  | 3.92E-48    | 14.0195977  | 0.104305682 | 3.68E-40    | PROTEOGLYCANS     | 1.314021817 | 134.4087633 |
| SPON1  | 10.11785977 | 9.49423014  | 0.042295002 | 10.11785977 | 5.324669318 | 4.84E-59    | ECM_GLYCOPROTEINS | 1.065685118 | 1.900185564 |
| SPON2  | 11.07854368 | 10.28166109 | 0.001107953 | 11.07854368 | 5.291855682 | 1.30E-11    | ECM_GLYCOPROTEINS | 1.077505238 | 2.093508278 |
| SRGN   | 11.88916782 | 10.93118557 | 1.81E-09    | 11.88916782 | 3.626101136 | 3.61E-07    | PROTEOGLYCANS     | 1.087637543 | 3.278774466 |
| SRPX   | 9.232768966 | 8.084828522 | 1.83E-06    | 9.232768966 | 5.828085227 | 3.19E-23    | ECM_GLYCOPROTEINS | 1.141986987 | 1.584185647 |
| SRPX2  | 8.36175977  | 7.652218054 | 0.003614801 | 8.36175977  | 0.447057955 | 5.98E-12    | ECM_GLYCOPROTEINS | 1.092723667 | 18.70397268 |
| SSPO   | 7.347136782 | 5.560898905 | 5.40E-16    | 7.347136782 | 2.583748864 | 2.09E-36    | ECM_GLYCOPROTEINS | 1.321213873 | 2.843595554 |
| SULF1  | 14.45171034 | 10.97815528 | 8.92E-40    | 14.45171034 | 7.992345455 | 1.65E-12    | ECM_REGULATORS    | 1.316406079 | 1.808193906 |
| SULF2  | 12.93065977 | 11.7754912  | 1.03E-10    | 12.93065977 | 8.803554545 | 1.11E-15    | ECM_REGULATORS    | 1.098099396 | 1.46879987  |
| SVEP1  | 10.48504483 | 8.154217453 | 4.15E-25    | 10.48504483 | 7.204344318 | 1.02E-16    | ECM_GLYCOPROTEINS | 1.285843171 | 1.455378084 |
| TGFBI  | 14.87025057 | 12.24063272 | 1.07E-34    | 14.87025057 | 0.331004545 | 7.14E-82    | ECM_GLYCOPROTEINS | 1.214826956 | 44.9246114  |
| TGM1   | 11.5793046  | 6.321878562 | 5.88E-69    | 11.5793046  | 11.41854091 | 0.000450036 | ECM_REGULATORS    | 1.831624016 | 1.01407918  |
| THBS2  | 14.00004483 | 11.08485729 | 1.10E-32    | 14.00004483 | 2.990764773 | 3.60E-190   | ECM_GLYCOPROTEINS | 1.262988279 | 4.681091925 |
| THBS3  | 12.23914483 | 9.812401105 | 2.07E-113   | 12.23914483 | 5.484704545 | 2.01E-73    | ECM_GLYCOPROTEINS | 1.247313955 | 2.231504856 |
| TIMP1  | 15.54036667 | 13.0121327  | 6.18E-42    | 15.54036667 | 10.69748068 | 4.13E-49    | ECM_REGULATORS    | 1.194298201 | 1.452712758 |
| TIMP2  | 15.08115057 | 13.25271185 | 1.20E-36    | 15.08115057 | 7.864988636 | 9.28E-89    | ECM_REGULATORS    | 1.137967138 | 1.917504433 |
| TIMP3  | 14.05314368 | 13.18876945 | 1.37E-05    | 14.05314368 | 10.76498864 | 1.72E-09    | ECM_REGULATORS    | 1.065538657 | 1.305449003 |
| TNXB   | 13.48152529 | 9.390344732 | 4.53E-87    | 13.48152529 | 9.466342045 | 9.41E-85    | ECM_GLYCOPROTEINS | 1.435679485 | 1.424153619 |
| VCAN   | 13.09112414 | 11.61817348 | 5.05E-09    | 13.09112414 | 0.205842045 | 3.90E-13    | PROTEOGLYCANS     | 1.126779882 | 63.59791125 |
| WNT10A | 9.30503908  | 6.003330702 | 3.90E-29    | 9.30503908  | 6.650735227 | 3.13E-16    | SECRETED_FACTORS  | 1.549979427 | 1.399099312 |
| WNT2B  | 11.87002759 | 7.527508613 | 1.18E-132   | 11.87002759 | 9.662820455 | 1.63E-14    | SECRETED_FACTORS  | 1.576886616 | 1.228422658 |
| WNT3   | 8.876863218 | 6.97752722  | 3.35E-25    | 8.876863218 | 0.864421591 | 4.05E-61    | SECRETED_FACTORS  | 1.272207609 | 10.26913639 |
| WNT4   | 8.857716092 | 7.011031117 | 1.12E-14    | 8.857716092 | 5.422438636 | 1.23E-83    | SECRETED_FACTORS  | 1.263397059 | 1.633529983 |
| WNT7B  | 8.170763218 | 7.311771892 | 0.026959202 | 8.170763218 | 1.833001136 | 3.92E-13    | SECRETED_FACTORS  | 1.117480597 | 4.457587645 |
| WNT9A  | 9.501265517 | 6.908381876 | 1.02E-28    | 9.501265517 | 1.376176136 | 1.21E-60    | SECRETED_FACTORS  | 1.375324307 | 6.904105707 |
| VTN    | 11.91651954 | 5.223164966 | 2.63E-68    | 11.91651954 | 5.340589773 | 3.01E-17    | ECM_GLYCOPROTEINS | 2.281474856 | 2.231311531 |
| XCL2   | 5.018388506 | 3.469792591 | 6.87E-15    | 5.018388506 | 0.949342045 | 5.17E-08    | SECRETED_FACTORS  | 1.44630792  | 5.286175336 |
| ZP3    | 8.422656322 | 7.805067729 | 0.000105855 | 8.422656322 | 6.596473864 | 2.11E-11    | ECM_GLYCOPROTEINS | 1.079126615 | 1.276842218 |
| ZPLD1  | 3.164602299 | 2.273493173 | 9.35E-05    | 3.164602299 | 1.234010227 | 8.26E-118   | ECM_GLYCOPROTEINS | 1.391955928 | 2.564486281 |

Ovarian serous cystadenocarcinoma (OV)

| Signature genes | Expression in tumor | Expression in rest of Pan-Cancer | P-value     | Expression in tumor | Expression in normal tissue | P-value     | Matrisome category | Fold change vs. Pan-Cancer | Fold change vs. normal |
|-----------------|---------------------|----------------------------------|-------------|---------------------|-----------------------------|-------------|--------------------|----------------------------|------------------------|
| ADAM15          | 12.48514379         | 12.14891079                      | 2.95E-12    | 12.48514379         | 0.83795                     | 7.50E-187   | ECM_REGULATORS     | 1.02767598                 | 14.89962861            |
| ADAM28          | 8.990647073         | 7.972306027                      | 3.06E-26    | 8.990647073         | 0.294375                    | 4.94E-145   | ECM_REGULATORS     | 1.127734816                | 30.54147626            |
| ADAM32          | 6.490762061         | 4.516453379                      | 7.39E-121   | 6.490762061         | 3.996519318                 | 7.40E-19    | ECM_REGULATORS     | 1.437136956                | 1.624103762            |
| ADAM33          | 7.501688993         | 6.098849371                      | 3.55E-33    | 7.501688993         | 2.576570455                 | 5.03E-45    | ECM_REGULATORS     | 1.230017096                | 2.911501597            |
| ADAM8           | 9.895855738         | 8.835672108                      | 1.31E-33    | 9.895855738         | 1.253972727                 | 1.04E-36    | ECM_REGULATORS     | 1.119989019                | 7.891603639            |
| ADAMTS17        | 7.097877986         | 6.469939052                      | 5.79E-15    | 7.097877986         | 1.917002273                 | 3.35E-15    | ECM_REGULATORS     | 1.097054845                | 3.702592369            |
| ADAMTS3         | 6.319719438         | 5.853245323                      | 5.66E-07    | 6.319719438         | 2.823254545                 | 2.66E-39    | ECM_REGULATORS     | 1.079694954                | 2.238451878            |
| ADAMTS6         | 5.994201405         | 5.745067502                      | 0.004412245 | 5.994201405         | 0                           | 5.32E-07    | ECM_REGULATORS     | 1.043364835                | Inf                    |
| ADAMTS7         | 8.4660363           | 8.034459517                      | 1.29E-08    | 8.4660363           | 1.104234091                 | 5.44E-205   | ECM_REGULATORS     | 1.053715721                | 7.666885463            |
| ADAMTS9         | 9.294612412         | 8.977638991                      | 0.000394246 | 9.294612412         | 5.987080682                 | 0.017371379 | ECM_REGULATORS     | 1.035306991                | 1.552444823            |
| AGRN            | 14.71028829         | 13.22559015                      | 3.64E-120   | 14.71028829         | 5.316565909                 | 6.31E-220   | BASEMENT_MEMBRANES | 1.1122595                  | 2.76687782             |
| AGRN            | 14.71028829         | 13.22559015                      | 3.64E-120   | 14.71028829         | 5.316565909                 | 6.31E-220   | ECM_GLYCOPROTEINS  | 1.1122595                  | 2.76687782             |
| AMH             | 5.300237471         | 4.810524026                      | 4.11E-05    | 5.300237471         | 0.357515909                 | 7.70E-110   | SECRETED_FACTORS   | 1.101800436                | 14.82517934            |
| ANXA1           | 12.8387733          | 12.58123836                      | 0.012056242 | 12.8387733          | 0.224142045                 | 4.86E-06    | ECM_AFFILIATED     | 1.020469761                | 57.27962942            |
| ANXA11          | 13.72866932         | 12.7730452                       | 3.64E-80    | 13.72866932         | 13.39536591                 | 3.51E-93    | ECM_AFFILIATED     | 1.074815685                | 1.024881994            |
| ANXA13          | 4.642310773         | 3.967160166                      | 5.07E-05    | 4.642310773         | 0.0342625                   | 7.55E-284   | ECM_AFFILIATED     | 1.170184862                | 135.4924706            |
| ANXA3           | 10.84480375         | 9.076169795                      | 1.75E-40    | 10.84480375         | 3.499820455                 | 3.36E-16    | ECM_AFFILIATED     | 1.194865675                | 3.098674314            |
| ANXA9           | 7.895020609         | 7.391378034                      | 7.39E-07    | 7.895020609         | 0.125560227                 | 1.30E-113   | ECM_AFFILIATED     | 1.068139199                | 62.87835551            |
| ARTN            | 7.537910539         | 5.393294866                      | 2.99E-90    | 7.537910539         | 0.296636364                 | 1.18E-136   | SECRETED_FACTORS   | 1.397644803                | 25.41128285            |
| ASTL            | 4.293822482         | 1.822395333                      | 1.50E-245   | 4.293822482         | 3.903072727                 | 1.64e-318   | ECM_REGULATORS     | 2.356142164                | 1.100113368            |
| BGN             | 13.58052763         | 13.22805289                      | 0.000364603 | 13.58052763         | 5.793145455                 | 4.31E-116   | PROTEOGLYCANS      | 1.026646003                | 2.344240748            |
| BMP1            | 10.92875902         | 10.62568557                      | 3.27E-08    | 10.92875902         | 9.4256625                   | 4.66E-194   | ECM_REGULATORS     | 1.028522719                | 1.159468527            |
| BMP3            | 4.07574918          | 3.637397748                      | 0.005978949 | 4.07574918          | 2.530544318                 | 2.76E-137   | SECRETED_FACTORS   | 1.120512373                | 1.610621537            |
| BMP7            | 10.76211382         | 7.891825122                      | 2.08E-54    | 10.76211382         | 8.190473864                 | 3.19E-187   | SECRETED_FACTORS   | 1.363704042                | 1.313979386            |
| BTC             | 8.428602342         | 6.360064255                      | 8.78E-72    | 8.428602342         | 1.7589625                   | 3.00E-56    | SECRETED_FACTORS   | 1.325238552                | 4.791803317            |
| C1QA            | 11.7279555          | 11.46953003                      | 0.002884938 | 11.7279555          | 9.521038636                 | 6.10E-87    | ECM_AFFILIATED     | 1.022531479                | 1.23179371             |
| C1QB            | 12.45649087         | 11.60875435                      | 1.54E-20    | 12.45649087         | 11.57160795                 | 7.85E-13    | ECM_AFFILIATED     | 1.073025623                | 1.076470177            |
| C1QC            | 12.39126581         | 11.44195078                      | 3.62E-27    | 12.39126581         | 6.343613636                 | 1.04E-59    | ECM_AFFILIATED     | 1.082967935                | 1.953344973            |
| C1QTNF3         | 8.530044262         | 7.913812125                      | 1.45E-10    | 8.530044262         | 2.171843182                 | 1.58E-17    | ECM_AFFILIATED     | 1.077867926                | 3.927559933            |
| C1QTNF9         | 2.91544637          | 2.234241751                      | 2.19E-17    | 2.91544637          | 2.696727273                 | 6.52E-45    | ECM_AFFILIATED     | 1.304892977                | 1.081105383            |
| CCBE1           | 5.069017564         | 4.744636242                      | 0.009695747 | 5.069017564         | 1.862502273                 | 1.82E-45    | SECRETED_FACTORS   | 1.068368007                | 2.721616848            |
| CCL11           | 5.451006557         | 3.992449848                      | 5.45E-25    | 5.451006557         | 0.786252273                 | 2.56E-65    | SECRETED_FACTORS   | 1.365328749                | 6.93289768             |
| CCL20           | 6.977606792         | 5.934170637                      | 6.14E-10    | 6.977606792         | 5.353228409                 | 5.87E-76    | SECRETED_FACTORS   | 1.175835212                | 1.30343902             |
| CCL28           | 10.06684098         | 7.860008797                      | 9.50E-80    | 10.06684098         | 9.537213636                 | 7.34E-209   | SECRETED_FACTORS   | 1.28076714                 | 1.055532713            |
| CCL3            | 7.773451756         | 7.42891946                       | 5.43E-05    | 7.773451756         | 6.340792045                 | 1.97E-199   | SECRETED_FACTORS   | 1.046377175                | 1.225943337            |
| CILP2           | 9.421063934         | 6.188143638                      | 3.87E-150   | 9.421063934         | 3.601670455                 | 6.14E-106   | ECM_GLYCOPROTEINS  | 1.522437824                | 2.615748457            |
| CLCF1           | 10.0505096          | 7.586128267                      | 7.16E-179   | 10.0505096          | 7.252020455                 | 1.09E-71    | SECRETED_FACTORS   | 1.324853634                | 1.385890962            |
| CLEC11A         | 10.35459321         | 8.441903297                      | 2.47E-158   | 10.35459321         | 4.235623864                 | 3.84E-84    | ECM_AFFILIATED     | 1.226570934                | 2.444644176            |
| CLEC18C         | 4.881362295         | 3.382231341                      | 7.51E-30    | 4.881362295         | 4.195159091                 | 3.03E-115   | ECM_AFFILIATED     | 1.44323726                 | 1.163570246            |
| CLEC4E          | 5.711822482         | 5.393684253                      | 0.000880143 | 5.711822482         | 4.371936364                 | 2.58E-42    | ECM_AFFILIATED     | 1.058983473                | 1.306474296            |
| COL10A1         | 8.56577096          | 6.825529769                      | 1.19E-21    | 8.56577096          | 4.158871591                 | 6.09E-79    | COLLAGENS          | 1.254960604                | 2.059638239            |
| COL11A1         | 9.036805855         | 7.396753967                      | 3.54E-18    | 9.036805855         | 4.648151136                 | 1.75E-181   | COLLAGENS          | 1.221725894                | 1.944172121            |

|         |             |             |             |             |             |             |                    |             |             |
|---------|-------------|-------------|-------------|-------------|-------------|-------------|--------------------|-------------|-------------|
| COL11A2 | 6.672815691 | 5.946932295 | 1.28E-11    | 6.672815691 | 3.157593182 | 1.52E-164   | COLLAGENS          | 1.122060141 | 2.113260102 |
| COL12A1 | 12.09792014 | 11.25151982 | 3.06E-11    | 12.09792014 | 6.947123864 | 5.02E-277   | COLLAGENS          | 1.075225422 | 1.741428594 |
| COL13A1 | 7.876257143 | 6.311790513 | 1.84E-64    | 7.876257143 | 4.500606818 | 2.56E-17    | COLLAGENS          | 1.247864156 | 1.750043374 |
| COL18A1 | 13.93399906 | 12.81815479 | 3.27E-53    | 13.93399906 | 4.852423864 | 4.53E-101   | COLLAGENS          | 1.087051865 | 2.871554393 |
| COL18A1 | 13.93399906 | 12.81815479 | 3.27E-53    | 13.93399906 | 4.852423864 | 4.53E-101   | BASEMENT_MEMBRANES | 1.087051865 | 2.871554393 |
| COL1A1  | 16.64154965 | 14.65339649 | 2.67E-39    | 16.64154965 | 5.928756818 | 1.19E-213   | COLLAGENS          | 1.135678657 | 2.806920601 |
| COL1A2  | 15.60984754 | 14.44426474 | 7.72E-19    | 15.60984754 | 7.728581818 | 2.30E-108   | COLLAGENS          | 1.080695198 | 2.019755747 |
| COL25A1 | 5.066418735 | 3.819856331 | 9.31E-27    | 5.066418735 | 3.960978409 | 1.30E-81    | COLLAGENS          | 1.32633751  | 1.279082644 |
| COL3A1  | 14.88629157 | 14.24504373 | 1.09E-05    | 14.88629157 | 4.069794318 | 0.000299101 | COLLAGENS          | 1.045015505 | 3.657750344 |
| COL4A5  | 9.838145667 | 9.243899087 | 3.77E-07    | 9.838145667 | 6.1588875   | 1.10E-42    | BASEMENT_MEMBRANES | 1.064285273 | 1.597390059 |
| COL4A5  | 9.838145667 | 9.243899087 | 3.77E-07    | 9.838145667 | 6.1588875   | 1.10E-42    | COLLAGENS          | 1.064285273 | 1.597390059 |
| COL6A2  | 13.69983934 | 13.26451559 | 1.80E-05    | 13.69983934 | 11.82396818 | 5.83E-199   | COLLAGENS          | 1.032818669 | 1.158649882 |
| COL6A2  | 13.69983934 | 13.26451559 | 1.80E-05    | 13.69983934 | 11.82396818 | 5.83E-199   | BASEMENT_MEMBRANES | 1.032818669 | 1.158649882 |
| COL6A3  | 13.04769977 | 12.61917087 | 0.001570708 | 13.04769977 | 12.88514318 | 7.01E-138   | COLLAGENS          | 1.033958562 | 1.012615815 |
| COL6A3  | 13.04769977 | 12.61917087 | 0.001570708 | 13.04769977 | 12.88514318 | 7.01E-138   | BASEMENT_MEMBRANES | 1.033958562 | 1.012615815 |
| COL9A2  | 10.4104548  | 8.640044349 | 2.13E-64    | 10.4104548  | 9.830579545 | 2.42E-35    | COLLAGENS          | 1.204907565 | 1.058986884 |
| COMP    | 8.877429274 | 7.174488322 | 1.04E-19    | 8.877429274 | 8.0084125   | 1.85E-241   | ECM_GLYCOPROTEINS  | 1.237360614 | 1.108512989 |
| CPAMD8  | 9.748430445 | 7.514284355 | 1.44E-85    | 9.748430445 | 3.203618182 | 2.18E-212   | ECM_REGULATORS     | 1.297319876 | 3.042943913 |
| CRELD1  | 10.35396136 | 10.23590371 | 0.007239613 | 10.35396136 | 6.756992045 | 2.00E-139   | ECM_GLYCOPROTEINS  | 1.011533681 | 1.532332921 |
| CSF1    | 11.84504098 | 10.53760739 | 2.40E-97    | 11.84504098 | 1.706475    | 0.0190492   | SECRETED_FACTORS   | 1.124073098 | 6.941233234 |
| CSH1    | 0.407759953 | 0.227973823 | 2.10E-05    | 0.407759953 | 0.2683125   | 1.92E-68    | SECRETED_FACTORS   | 1.788626201 | 1.519720301 |
| CST7    | 7.279537237 | 7.026111891 | 0.009672354 | 7.279537237 | 5.448784091 | 6.40E-233   | ECM_REGULATORS     | 1.036069073 | 1.335992969 |
| CSTL1   | 1.240477986 | 0.550957741 | 4.73E-46    | 1.240477986 | 1.133457955 | 2.39E-200   | ECM_REGULATORS     | 2.251493885 | 1.094419057 |
| CTGF    | 12.25030351 | 11.970925   | 0.003653573 | 12.25030351 | 0.140071591 | 1.66E-06    | ECM_GLYCOPROTEINS  | 1.023338089 | 87.45744539 |
| CTHRC1  | 10.50398337 | 9.014697656 | 2.90E-32    | 10.50398337 | 7.952111364 | 5.82E-133   | ECM_GLYCOPROTEINS  | 1.165206397 | 1.320904964 |
| CTSA    | 13.02873607 | 12.80799154 | 1.93E-06    | 13.02873607 | 0.294693182 | 5.18E-86    | ECM_REGULATORS     | 1.017234906 | 44.21118936 |
| CTSB    | 15.42844309 | 15.22466902 | 0.001114148 | 15.42844309 | 10.11695114 | 5.66E-219   | ECM_REGULATORS     | 1.013384466 | 1.525009154 |
| CTSF    | 11.82877073 | 10.87263265 | 1.64E-36    | 11.82877073 | 4.0361375   | 7.97E-232   | ECM_REGULATORS     | 1.087939886 | 2.930715499 |
| CXCL3   | 5.973495785 | 5.303557102 | 3.00E-07    | 5.973495785 | 4.897975    | 0.010572939 | SECRETED_FACTORS   | 1.126318746 | 1.219584784 |
| CXCL6   | 5.054540281 | 4.524416213 | 0.001015238 | 5.054540281 | 0.363067045 | 4.95E-134   | SECRETED_FACTORS   | 1.117169607 | 13.92178206 |
| CXCL8   | 8.522983138 | 8.017859619 | 0.000315103 | 8.522983138 | 7.288136364 | 1.38E-72    | SECRETED_FACTORS   | 1.062999796 | 1.169432447 |
| CYR61   | 11.85251686 | 11.52534416 | 0.000940609 | 11.85251686 | 10.858025   | 4.26E-91    | ECM_GLYCOPROTEINS  | 1.02838724  | 1.091590493 |
| DCN     | 12.79317119 | 12.01249609 | 3.77E-09    | 12.79317119 | 8.570943182 | 3.72E-290   | PROTEOGLYCANS      | 1.064988583 | 1.492621165 |
| DDX26B  | 8.360422717 | 8.162516518 | 0.001945433 | 8.360422717 | 1.648797727 | 5.87E-103   | ECM_GLYCOPROTEINS  | 1.024245733 | 5.070617565 |
| EFEMP2  | 11.7654459  | 10.38452637 | 1.84E-79    | 11.7654459  | 3.0062375   | 3.64E-110   | ECM_GLYCOPROTEINS  | 1.132978576 | 3.913678111 |
| EGFL8   | 7.777307728 | 7.638513687 | 0.038435086 | 7.777307728 | 7.413967045 | 5.62E-41    | SECRETED_FACTORS   | 1.018170294 | 1.049007593 |
| EGFLAM  | 8.494968618 | 7.595239631 | 8.18E-25    | 8.494968618 | 6.383727273 | 4.08E-23    | ECM_GLYCOPROTEINS  | 1.118459592 | 1.330722359 |
| EGLN1   | 11.35399461 | 11.20512424 | 6.46E-05    | 11.35399461 | 7.600998864 | 2.53E-66    | ECM_REGULATORS     | 1.013285919 | 1.493750337 |
| EMID1   | 10.46482108 | 7.99631111  | 9.13E-171   | 10.46482108 | 8.202040909 | 1.74E-161   | ECM_GLYCOPROTEINS  | 1.308706094 | 1.275880137 |
| EPYC    | 5.904547775 | 2.419148752 | 4.47E-144   | 5.904547775 | 1.913973864 | 7.57E-109   | PROTEOGLYCANS      | 2.440754323 | 3.084967819 |
| ESM1    | 8.079577752 | 7.674007447 | 0.001203474 | 8.079577752 | 6.248171591 | 1.16E-127   | PROTEOGLYCANS      | 1.052849871 | 1.293110734 |
| FAM20A  | 10.39689578 | 8.4744243   | 2.12E-73    | 10.39689578 | 5.639498864 | 1.07E-126   | ECM_REGULATORS     | 1.226855703 | 1.843585048 |
| FAM20C  | 10.86873934 | 10.67585045 | 0.003956992 | 10.86873934 | 2.013855682 | 3.19E-166   | ECM_REGULATORS     | 1.018067778 | 5.396980252 |
| FBLN1   | 12.29278103 | 11.54563504 | 1.60E-10    | 12.29278103 | 5.178522727 | 2.30E-68    | ECM_GLYCOPROTEINS  | 1.06471242  | 2.37380073  |
| FBLN5   | 10.73922108 | 9.85804377  | 6.85E-25    | 10.73922108 | 8.263398864 | 5.86E-274   | ECM_GLYCOPROTEINS  | 1.08938663  | 1.299613059 |
| FBN3    | 8.621191335 | 4.011001157 | 1.09E-167   | 8.621191335 | 5.654632955 | 2.92E-119   | ECM_GLYCOPROTEINS  | 2.1493864   | 1.524624393 |

|         |             |             |             |             |             |             |                    |             |             |
|---------|-------------|-------------|-------------|-------------|-------------|-------------|--------------------|-------------|-------------|
| FCN1    | 6.726763232 | 6.401334771 | 0.002908352 | 6.726763232 | 4.508817045 | 2.33E-222   | ECM_AFFILIATED     | 1.050837594 | 1.491913104 |
| FGF12   | 7.513144965 | 6.254173793 | 5.78E-27    | 7.513144965 | 2.663564773 | 5.42E-143   | SECRETED_FACTORS   | 1.201300957 | 2.820710441 |
| FGF17   | 4.41496534  | 3.041329129 | 4.98E-37    | 4.41496534  | 3.023728409 | 8.10E-11    | SECRETED_FACTORS   | 1.451656546 | 1.460106446 |
| FGF3    | 1.912965105 | 0.352845323 | 1.40E-128   | 1.912965105 | 0.704777273 | 1.38E-245   | SECRETED_FACTORS   | 5.421540212 | 2.714283192 |
| FMOD    | 11.88809859 | 10.27177107 | 1.37E-43    | 11.88809859 | 6.794548864 | 3.77E-75    | PROTEOGLYCANS      | 1.157356264 | 1.749652381 |
| FNDC1   | 9.600284778 | 8.140779241 | 2.93E-21    | 9.600284778 | 0.142098864 | 4.48E-211   | ECM_GLYCOPROTEINS  | 1.179283272 | 67.56060205 |
| FRAS1   | 9.537160422 | 8.321466934 | 5.05E-23    | 9.537160422 | 8.400604545 | 1.42E-169   | ECM_GLYCOPROTEINS  | 1.146091248 | 1.135294534 |
| GAS6    | 13.41380141 | 11.6797751  | 3.07E-136   | 13.41380141 | 7.357082955 | 0           | ECM_GLYCOPROTEINS  | 1.148464015 | 1.823249988 |
| GPC4    | 10.34589438 | 9.904581849 | 5.16E-05    | 10.34589438 | 0.904875    | 8.01E-57    | ECM_AFFILIATED     | 1.044556402 | 11.4335067  |
| GPC5    | 4.01459274  | 2.882405702 | 1.18E-19    | 4.01459274  | 2.522506818 | 2.78E-293   | ECM_AFFILIATED     | 1.392792395 | 1.591509173 |
| HAPLN1  | 6.266915457 | 5.175917735 | 2.16E-13    | 6.266915457 | 0.216446591 | 7.07E-48    | PROTEOGLYCANS      | 1.210783435 | 28.95363438 |
| HAPLN3  | 9.951475176 | 8.43607989  | 6.45E-69    | 9.951475176 | 8.379421591 | 6.96E-14    | PROTEOGLYCANS      | 1.179632638 | 1.187608842 |
| HSPG2   | 13.8345363  | 13.3520807  | 5.08E-11    | 13.8345363  | 3.715952273 | 1.25E-96    | BASEMENT_MEMBRANES | 1.036133364 | 3.723012376 |
| HSPG2   | 13.8345363  | 13.3520807  | 5.08E-11    | 13.8345363  | 3.715952273 | 1.25E-96    | PROTEOGLYCANS      | 1.036133364 | 3.723012376 |
| HYAL2   | 11.67794941 | 11.12761848 | 2.94E-45    | 11.67794941 | 1.068781818 | 1.87E-110   | ECM_REGULATORS     | 1.049456309 | 10.926411   |
| HYAL3   | 8.296868852 | 7.050463809 | 1.83E-140   | 8.296868852 | 0.793639773 | 3.69E-168   | ECM_REGULATORS     | 1.176783411 | 10.45419992 |
| IBSP    | 5.127900703 | 3.200376563 | 2.15E-49    | 5.127900703 | 3.661544318 | 3.34E-22    | ECM_GLYCOPROTEINS  | 1.60228042  | 1.400474843 |
| IGFBP2  | 14.77849578 | 11.38359689 | 6.42E-197   | 14.77849578 | 3.308595455 | 2.26E-125   | ECM_GLYCOPROTEINS  | 1.298227259 | 4.466697723 |
| IGFBP7  | 13.84322201 | 13.38459881 | 4.92E-13    | 13.84322201 | 3.753894318 | 8.33E-66    | ECM_GLYCOPROTEINS  | 1.034264994 | 3.687696254 |
| IGSF10  | 8.022576347 | 5.921321195 | 3.41E-62    | 8.022576347 | 6.493828409 | 2.43E-51    | ECM_GLYCOPROTEINS  | 1.354862552 | 1.235415512 |
| IMPG2   | 7.325644496 | 3.689035166 | 0           | 7.325644496 | 0.720606818 | 3.48E-94    | PROTEOGLYCANS      | 1.98578874  | 10.16593836 |
| ITIH5   | 9.616670492 | 9.139512622 | 1.88E-05    | 9.616670492 | 6.149601136 | 1.49E-89    | ECM_REGULATORS     | 1.05220824  | 1.56378768  |
| ITIH6   | 3.217039344 | 2.710970495 | 0.000450531 | 3.217039344 | 2.437770455 | 2.48E-220   | ECM_REGULATORS     | 1.186674422 | 1.319664589 |
| KAZALD1 | 8.061175644 | 7.345047088 | 7.37E-17    | 8.061175644 | 4.251143182 | 8.24E-50    | ECM_REGULATORS     | 1.097498157 | 1.896237153 |
| KY      | 3.736312178 | 3.150563931 | 1.14E-07    | 3.736312178 | 2.282142045 | 3.45E-210   | ECM_REGULATORS     | 1.18591854  | 1.637195277 |
| LAMA5   | 14.21761265 | 12.23349818 | 2.30E-181   | 14.21761265 | 5.271243182 | 1.32E-117   | BASEMENT_MEMBRANES | 1.162187008 | 2.697202947 |
| LAMA5   | 14.21761265 | 12.23349818 | 2.30E-181   | 14.21761265 | 5.271243182 | 1.32E-117   | ECM_GLYCOPROTEINS  | 1.162187008 | 2.697202947 |
| LAMB2   | 13.05291335 | 12.69586931 | 8.37E-09    | 13.05291335 | 6.199969318 | 3.90E-109   | ECM_GLYCOPROTEINS  | 1.028122851 | 2.105319023 |
| LAMB2   | 13.05291335 | 12.69586931 | 8.37E-09    | 13.05291335 | 6.199969318 | 3.90E-109   | BASEMENT_MEMBRANES | 1.028122851 | 2.105319023 |
| LAMB3   | 11.2414377  | 10.80988009 | 0.002379016 | 11.2414377  | 5.342407955 | 0.021209709 | BASEMENT_MEMBRANES | 1.039922516 | 2.104189309 |
| LAMB3   | 11.2414377  | 10.80988009 | 0.002379016 | 11.2414377  | 5.342407955 | 0.021209709 | ECM_GLYCOPROTEINS  | 1.039922516 | 2.104189309 |
| LAMC1   | 13.46229813 | 12.75514809 | 2.62E-27    | 13.46229813 | 1.8319125   | 1.93E-155   | BASEMENT_MEMBRANES | 1.055440362 | 7.348767    |
| LAMC1   | 13.46229813 | 12.75514809 | 2.62E-27    | 13.46229813 | 1.8319125   | 1.93E-155   | ECM_GLYCOPROTEINS  | 1.055440362 | 7.348767    |
| LAMC2   | 12.14237049 | 9.999060248 | 1.48E-28    | 12.14237049 | 3.909002273 | 4.81E-64    | ECM_GLYCOPROTEINS  | 1.214351168 | 3.106258233 |
| LAMC2   | 12.14237049 | 9.999060248 | 1.48E-28    | 12.14237049 | 3.909002273 | 4.81E-64    | BASEMENT_MEMBRANES | 1.214351168 | 3.106258233 |
| LAMC3   | 8.385036066 | 7.744194998 | 3.52E-10    | 8.385036066 | 5.444       | 5.32E-10    | ECM_GLYCOPROTEINS  | 1.082751153 | 1.540234399 |
| LAMC3   | 8.385036066 | 7.744194998 | 3.52E-10    | 8.385036066 | 5.444       | 5.32E-10    | BASEMENT_MEMBRANES | 1.082751153 | 1.540234399 |
| LGALS1  | 13.08060422 | 12.6650971  | 2.89E-09    | 13.08060422 | 9.332195455 | 4.32E-208   | ECM_AFFILIATED     | 1.032807259 | 1.401664194 |
| LGALS9  | 11.9534096  | 10.8248943  | 4.06E-55    | 11.9534096  | 8.188831818 | 2.77E-32    | ECM_AFFILIATED     | 1.104251854 | 1.459720979 |
| LOX     | 9.938874941 | 9.511695292 | 4.31E-05    | 9.938874941 | 1.688184091 | 1.16E-315   | ECM_REGULATORS     | 1.04491099  | 5.887317026 |
| LOXL1   | 10.98252319 | 9.145221246 | 5.24E-80    | 10.98252319 | 9.193948864 | 8.00E-314   | ECM_REGULATORS     | 1.200902951 | 1.194538206 |
| LOXL4   | 8.863853396 | 7.771169947 | 1.96E-21    | 8.863853396 | 2.124920455 | 7.34E-248   | ECM_REGULATORS     | 1.140607329 | 4.171381275 |
| LRG1    | 8.839179625 | 8.301315179 | 0.00027813  | 8.839179625 | 0.161159091 | 5.04E-128   | ECM_GLYCOPROTEINS  | 1.064792679 | 54.84753963 |
| LTBP2   | 12.37901124 | 11.20731689 | 8.13E-35    | 12.37901124 | 6.822564773 | 7.90E-323   | ECM_GLYCOPROTEINS  | 1.104547267 | 1.814421944 |
| LTBP3   | 13.44267728 | 12.11826726 | 2.81E-108   | 13.44267728 | 9.146761364 | 1.37E-161   | ECM_GLYCOPROTEINS  | 1.109290379 | 1.469665245 |
| LTBP4   | 12.11983513 | 11.5422021  | 6.88E-15    | 12.11983513 | 1.134201136 | 2.58E-06    | ECM_GLYCOPROTEINS  | 1.050045305 | 10.68578997 |

|               |             |             |             |             |             |             |                    |             |             |
|---------------|-------------|-------------|-------------|-------------|-------------|-------------|--------------------|-------------|-------------|
| <b>MATN2</b>  | 10.86944379 | 10.28373041 | 7.84E-11    | 10.86944379 | 3.5017      | 0           | ECM_GLYCOPROTEINS  | 1.056955342 | 3.104047689 |
| <b>MFAP2</b>  | 11.74334918 | 8.950824838 | 3.18E-99    | 11.74334918 | 1.199613636 | 2.37E-56    | ECM_GLYCOPROTEINS  | 1.31198514  | 9.789276167 |
| <b>MFAP5</b>  | 9.402893208 | 6.656987033 | 9.81E-63    | 9.402893208 | 7.282652273 | 1.26E-216   | ECM_GLYCOPROTEINS  | 1.412484832 | 1.291135819 |
| <b>MFGE8</b>  | 13.30270937 | 11.69517655 | 8.41E-111   | 13.30270937 | 9.285703409 | 5.37E-268   | ECM_GLYCOPROTEINS  | 1.137452633 | 1.432601148 |
| <b>MMP11</b>  | 11.54939953 | 9.873782752 | 6.74E-33    | 11.54939953 | 1.070275    | 1.03E-17    | ECM_REGULATORS     | 1.169703631 | 10.79105794 |
| <b>MMP15</b>  | 11.29674473 | 10.75782345 | 8.90E-13    | 11.29674473 | 4.612923864 | 3.96E-206   | ECM_REGULATORS     | 1.050095755 | 2.448933706 |
| <b>MMP2</b>   | 12.66078244 | 12.24848089 | 3.70E-05    | 12.66078244 | 11.88949318 | 0           | ECM_REGULATORS     | 1.033661443 | 1.0648715   |
| <b>MMP23B</b> | 8.574217564 | 5.699775852 | 1.28E-243   | 8.574217564 | 2.105089773 | 4.17E-11    | ECM_REGULATORS     | 1.504307851 | 4.073088794 |
| <b>MMP24</b>  | 8.38033185  | 6.904115077 | 1.18E-34    | 8.38033185  | 0.241529545 | 5.77E-284   | ECM_REGULATORS     | 1.213816942 | 34.69692221 |
| <b>MMP7</b>   | 11.56676323 | 8.038498569 | 2.52E-70    | 11.56676323 | 11.35431364 | 1.54E-207   | ECM_REGULATORS     | 1.438920855 | 1.018710915 |
| <b>MUC1</b>   | 14.39931756 | 10.67021314 | 1.38E-118   | 14.39931756 | 4.323046591 | 1.54E-108   | ECM_AFFILIATED     | 1.349487342 | 3.330826366 |
| <b>MUC15</b>  | 6.271611007 | 4.596114418 | 9.74E-17    | 6.271611007 | 4.302838636 | 3.57E-25    | ECM_AFFILIATED     | 1.364546318 | 1.457551988 |
| <b>MUC16</b>  | 14.49132834 | 4.797925548 | 0           | 14.49132834 | 3.793965909 | 1.13E-33    | ECM_AFFILIATED     | 3.020332057 | 3.819572628 |
| <b>MUC20</b>  | 11.46670867 | 8.894625619 | 2.39E-88    | 11.46670867 | 5.420503409 | 2.26E-278   | ECM_AFFILIATED     | 1.289172716 | 2.115432424 |
| <b>MUC4</b>   | 8.354538642 | 6.646361627 | 3.60E-19    | 8.354538642 | 6.610771591 | 1.49E-51    | ECM_AFFILIATED     | 1.25700934  | 1.26377663  |
| <b>MUC5AC</b> | 3.784044731 | 3.154161932 | 0.002186994 | 3.784044731 | 3.622044318 | 0.001068024 | ECM_AFFILIATED     | 1.199698941 | 1.044726237 |
| <b>MUC5B</b>  | 8.774392037 | 5.923638474 | 7.67E-37    | 8.774392037 | 0.0289625   | 1.32E-58    | ECM_AFFILIATED     | 1.48125043  | 302.9569974 |
| <b>MXRA5</b>  | 12.50287166 | 10.98856956 | 2.74E-33    | 12.50287166 | 2.138310227 | 1.17E-29    | ECM_GLYCOPROTEINS  | 1.137807027 | 5.847080327 |
| <b>NGLY1</b>  | 10.28084169 | 9.957309619 | 2.13E-29    | 10.28084169 | 7.918786364 | 2.14E-109   | ECM_REGULATORS     | 1.032491916 | 1.298285017 |
| <b>NOV</b>    | 9.136040749 | 7.974512064 | 7.89E-33    | 9.136040749 | 8.679488636 | 1.79E-138   | ECM_GLYCOPROTEINS  | 1.145655142 | 1.052601269 |
| <b>NTN1</b>   | 10.05322623 | 8.348553653 | 5.94E-48    | 10.05322623 | 9.140754545 | 1.16E-06    | BASEMENT_MEMBRANES | 1.204187773 | 1.099824547 |
| <b>NTN1</b>   | 10.05322623 | 8.348553653 | 5.94E-48    | 10.05322623 | 9.140754545 | 1.16E-06    | ECM_GLYCOPROTEINS  | 1.204187773 | 1.099824547 |
| <b>NTN4</b>   | 10.05788361 | 9.74494795  | 0.002660868 | 10.05788361 | 0.432769318 | 1.71E-66    | BASEMENT_MEMBRANES | 1.032112604 | 23.24075017 |
| <b>NTN4</b>   | 10.05788361 | 9.74494795  | 0.002660868 | 10.05788361 | 0.432769318 | 1.71E-66    | ECM_GLYCOPROTEINS  | 1.032112604 | 23.24075017 |
| <b>NTN5</b>   | 4.996707963 | 3.628190138 | 1.67E-71    | 4.996707963 | 2.335186364 | 3.88E-17    | ECM_GLYCOPROTEINS  | 1.377190217 | 2.139746977 |
| <b>NTN5</b>   | 4.996707963 | 3.628190138 | 1.67E-71    | 4.996707963 | 2.335186364 | 3.88E-17    | BASEMENT_MEMBRANES | 1.377190217 | 2.139746977 |
| <b>NTNG1</b>  | 5.248816628 | 4.263854495 | 3.47E-11    | 5.248816628 | 2.505509091 | 2.39E-207   | BASEMENT_MEMBRANES | 1.231002754 | 2.094910231 |
| <b>NTNG1</b>  | 5.248816628 | 4.263854495 | 3.47E-11    | 5.248816628 | 2.505509091 | 2.39E-207   | ECM_GLYCOPROTEINS  | 1.231002754 | 2.094910231 |
| <b>OGFOD1</b> | 10.5195548  | 10.46721055 | 0.033215536 | 10.5195548  | 2.750610227 | 1.54E-90    | ECM_REGULATORS     | 1.005000783 | 3.824444008 |
| <b>OVGP1</b>  | 7.427050117 | 6.236974432 | 6.63E-52    | 7.427050117 | 6.919146591 | 5.56E-304   | ECM_AFFILIATED     | 1.190809775 | 1.073405516 |
| <b>PLAT</b>   | 11.42578103 | 10.77696345 | 2.18E-10    | 11.42578103 | 10.77925227 | 2.07E-80    | ECM_REGULATORS     | 1.060204118 | 1.059978999 |
| <b>PLXDC2</b> | 11.69932436 | 10.88319747 | 4.40E-25    | 11.69932436 | 0.061589773 | 2.52E-272   | ECM_AFFILIATED     | 1.074989624 | 189.9556345 |
| <b>PLXNA1</b> | 11.93970703 | 11.50542314 | 7.38E-12    | 11.93970703 | 5.021021591 | 5.84E-11    | ECM_AFFILIATED     | 1.037746016 | 2.377943773 |
| <b>PLXNA3</b> | 11.90166721 | 10.68557464 | 2.67E-113   | 11.90166721 | 8.4293625   | 3.41E-21    | ECM_AFFILIATED     | 1.113806941 | 1.411929694 |
| <b>PLXNB2</b> | 14.00893934 | 13.66575592 | 2.00E-15    | 14.00893934 | 6.501055682 | 1.60E-84    | ECM_AFFILIATED     | 1.025112656 | 2.154871459 |
| <b>PODNL1</b> | 8.589643091 | 6.57862844  | 2.37E-77    | 8.589643091 | 4.977126136 | 3.87E-148   | PROTEOGLYCANS      | 1.305689046 | 1.72582387  |
| <b>POMZP3</b> | 9.178620609 | 8.756252394 | 5.56E-20    | 9.178620609 | 1.451835227 | 7.35E-216   | ECM_GLYCOPROTEINS  | 1.048236185 | 6.322081485 |
| <b>PXDN</b>   | 12.30886628 | 11.23052421 | 2.04E-33    | 12.30886628 | 0.502647727 | 0           | ECM_GLYCOPROTEINS  | 1.096018854 | 24.48805716 |
| <b>PXDNL</b>  | 5.193834426 | 4.528682305 | 3.65E-11    | 5.193834426 | 2.552178409 | 4.11E-139   | ECM_GLYCOPROTEINS  | 1.146875421 | 2.035059308 |
| <b>RSPO1</b>  | 8.564930445 | 3.104684801 | 0           | 8.564930445 | 1.812540909 | 7.62E-103   | ECM_GLYCOPROTEINS  | 2.758711751 | 4.725372212 |
| <b>RSPO3</b>  | 7.648325761 | 5.651119978 | 5.89E-59    | 7.648325761 | 7.129190909 | 1.40E-33    | ECM_GLYCOPROTEINS  | 1.353417693 | 1.0728182   |
| <b>RSPO4</b>  | 7.476433724 | 4.043109953 | 1.12E-146   | 7.476433724 | 1.403763636 | 1.05E-105   | ECM_GLYCOPROTEINS  | 1.849178927 | 5.325991876 |
| <b>SBSPON</b> | 9.176945199 | 7.029450954 | 9.91E-87    | 9.176945199 | 8.265506818 | 2.90E-24    | ECM_GLYCOPROTEINS  | 1.30549957  | 1.110270114 |
| <b>SDC3</b>   | 12.44861593 | 11.85881039 | 9.51E-15    | 12.44861593 | 10.3619375  | 2.73E-118   | ECM_AFFILIATED     | 1.049735641 | 1.201379175 |
| <b>SEMA3B</b> | 11.47289344 | 9.45391739  | 5.03E-93    | 11.47289344 | 4.055819318 | 1.65E-107   | ECM_AFFILIATED     | 1.213559731 | 2.828748655 |
| <b>SEMA3C</b> | 10.50545831 | 10.05694137 | 0.000473095 | 10.50545831 | 0.316580682 | 7.78E-87    | ECM_AFFILIATED     | 1.044597749 | 33.18414204 |



|          |             |             |             |             |             |             |                   |             |             |
|----------|-------------|-------------|-------------|-------------|-------------|-------------|-------------------|-------------|-------------|
| SEMA3E   | 6.613915457 | 5.110393121 | 1.06E-20    | 6.613915457 | 1.547186364 | 7.54E-66    | ECM_AFFILIATED    | 1.294208743 | 4.274802061 |
| SEMA3F   | 11.979774   | 10.55742698 | 2.94E-56    | 11.979774   | 5.262152273 | 1.11E-165   | ECM_AFFILIATED    | 1.13472478  | 2.276592045 |
| SEMA4A   | 10.02389391 | 9.707560846 | 9.19E-05    | 10.02389391 | 5.029613636 | 9.62E-24    | ECM_AFFILIATED    | 1.032586256 | 1.992974935 |
| SEMA4C   | 11.45498876 | 10.742427   | 2.46E-55    | 11.45498876 | 7.172706818 | 0.001062539 | ECM_AFFILIATED    | 1.066331543 | 1.597024533 |
| SEMA4D   | 10.58986745 | 10.42550944 | 0.003379259 | 10.58986745 | 1.698551136 | 3.40E-145   | ECM_AFFILIATED    | 1.015764986 | 6.234647412 |
| SEMA4F   | 8.842200468 | 8.659497007 | 0.00032161  | 8.842200468 | 8.810028409 | 3.22E-238   | ECM_AFFILIATED    | 1.021098623 | 1.003651754 |
| SEMA5B   | 8.764908431 | 6.812674584 | 4.39E-62    | 8.764908431 | 1.245409091 | 1.27E-66    | ECM_AFFILIATED    | 1.286559093 | 7.037774571 |
| SEMA6D   | 9.093357377 | 7.733087804 | 9.48E-39    | 9.093357377 | 2.064331818 | 8.61E-99    | ECM_AFFILIATED    | 1.175902512 | 4.404988237 |
| SERPINA5 | 9.75081897  | 6.262222677 | 1.79E-75    | 9.75081897  | 0.026001136 | 3.99E-05    | ECM_REGULATORS    | 1.557085954 | 375.0151083 |
| SERPINB2 | 6.052825761 | 3.895233046 | 6.79E-32    | 6.052825761 | 3.463939773 | 2.80E-66    | ECM_REGULATORS    | 1.553905938 | 1.747381929 |
| SERPINB9 | 9.808486417 | 9.255728713 | 3.59E-17    | 9.808486417 | 6.230551136 | 9.11E-19    | ECM_REGULATORS    | 1.059720603 | 1.574256627 |
| SERPING1 | 14.44445925 | 12.83354895 | 1.85E-73    | 14.44445925 | 10.41882273 | 1.21E-233   | ECM_REGULATORS    | 1.125523369 | 1.386381132 |
| SERPINH1 | 13.75354707 | 12.63424212 | 9.96E-61    | 13.75354707 | 5.440107955 | 7.11E-172   | ECM_REGULATORS    | 1.088592964 | 2.528175394 |
| SLIT2    | 9.078046838 | 8.231706209 | 4.75E-15    | 9.078046838 | 3.686559091 | 3.86E-74    | ECM_GLYCOPROTEINS | 1.102814727 | 2.462471539 |
| SLIT3    | 10.3958918  | 9.712318679 | 2.49E-09    | 10.3958918  | 1.751048864 | 2.25E-13    | ECM_GLYCOPROTEINS | 1.070382073 | 5.936951286 |
| SLPI     | 14.4749377  | 9.350146459 | 4.35E-156   | 14.4749377  | 6.950823864 | 2.02E-09    | ECM_REGULATORS    | 1.54809743  | 2.08247799  |
| SMOC2    | 9.715422951 | 9.331990381 | 0.000694413 | 9.715422951 | 7.158918182 | 1.34E-184   | ECM_GLYCOPROTEINS | 1.041087973 | 1.357107695 |
| SNED1    | 9.375377752 | 9.168028551 | 0.007314321 | 9.375377752 | 2.744521591 | 1.24E-277   | ECM_GLYCOPROTEINS | 1.022616553 | 3.41603352  |
| SPOCK2   | 12.80686909 | 10.58218176 | 4.45E-99    | 12.80686909 | 0.104305682 | 0.001727572 | PROTEOGLYCANS     | 1.210229552 | 122.782085  |
| SPON1    | 14.56326745 | 9.212814702 | 0           | 14.56326745 | 5.324669318 | 3.90E-102   | ECM_GLYCOPROTEINS | 1.580762006 | 2.735055752 |
| SRPX2    | 7.945938407 | 7.697606859 | 0.028750269 | 7.945938407 | 0.447057955 | 5.88E-22    | ECM_GLYCOPROTEINS | 1.032260877 | 17.77384414 |
| SSPO     | 7.035513583 | 5.474774412 | 1.74E-53    | 7.035513583 | 2.583748864 | 3.24E-110   | ECM_GLYCOPROTEINS | 1.285078262 | 2.722986619 |
| ST14     | 13.31902553 | 11.62216987 | 1.56E-40    | 13.31902553 | 7.75235     | 6.41E-135   | ECM_REGULATORS    | 1.146001623 | 1.718062978 |
| SULF1    | 11.54973583 | 11.01650899 | 1.22E-05    | 11.54973583 | 7.992345455 | 2.75E-72    | ECM_REGULATORS    | 1.048402524 | 1.445099677 |
| THBS3    | 11.11961569 | 9.793048874 | 1.95E-157   | 11.11961569 | 5.484704545 | 5.47E-56    | ECM_GLYCOPROTEINS | 1.135460043 | 2.027386452 |
| THSD4    | 12.47778759 | 9.59101531  | 2.35E-148   | 12.47778759 | 0.623610227 | 0.000289088 | ECM_GLYCOPROTEINS | 1.300987141 | 20.00895278 |
| TIMP1    | 14.12874778 | 13.01716283 | 5.34E-38    | 14.12874778 | 10.69748068 | 2.90E-45    | ECM_REGULATORS    | 1.085393795 | 1.320754689 |
| TSPEAR   | 3.154500937 | 2.618330875 | 3.50E-07    | 3.154500937 | 0.246639773 | 2.09E-158   | ECM_GLYCOPROTEINS | 1.204775518 | 12.78991179 |
| WFIKKN1  | 5.423455269 | 5.017183685 | 4.63E-07    | 5.423455269 | 0.677475    | 0.00598092  | SECRETED_FACTORS  | 1.080976024 | 8.005395431 |
| WFIKKN2  | 3.403708899 | 2.330780469 | 6.92E-27    | 3.403708899 | 1.607265909 | 1.46E-237   | SECRETED_FACTORS  | 1.46033011  | 2.117701172 |
| WISP3    | 7.103237237 | 3.981010653 | 2.71E-202   | 7.103237237 | 2.821670455 | 2.42E-18    | ECM_GLYCOPROTEINS | 1.784279886 | 2.517387254 |
| WNT10A   | 10.31926628 | 5.772225994 | 1.44E-256   | 10.31926628 | 6.650735227 | 1.19E-96    | SECRETED_FACTORS  | 1.787744674 | 1.551597819 |
| WNT11    | 8.695292506 | 5.859420272 | 4.20E-129   | 8.695292506 | 2.8379625   | 6.74E-40    | SECRETED_FACTORS  | 1.483985122 | 3.063920861 |
| WNT2     | 6.356818501 | 5.529834111 | 2.21E-08    | 6.356818501 | 4.862244318 | 1.95E-05    | SECRETED_FACTORS  | 1.149549584 | 1.307383604 |
| WNT6     | 7.818470492 | 3.640180793 | 0           | 7.818470492 | 3.036595455 | 1.35E-186   | SECRETED_FACTORS  | 2.147824775 | 2.574748796 |
| WNT9A    | 7.697771194 | 6.88970344  | 4.97E-14    | 7.697771194 | 1.376176136 | 6.00E-124   | SECRETED_FACTORS  | 1.11728629  | 5.593594447 |
| VWA1     | 12.79596159 | 11.46398755 | 3.10E-81    | 12.79596159 | 9.995514773 | 4.20E-177   | ECM_GLYCOPROTEINS | 1.116187673 | 1.280170345 |
| VWA2     | 6.978196721 | 5.53905211  | 2.49E-21    | 6.978196721 | 3.028419318 | 8.01E-88    | ECM_GLYCOPROTEINS | 1.25981785  | 2.30423729  |
| VWA3A    | 5.838096956 | 2.750141213 | 2.22E-175   | 5.838096956 | 1.233936364 | 3.11E-33    | ECM_GLYCOPROTEINS | 2.122835339 | 4.731278798 |
| VWA7     | 7.94507822  | 6.533085856 | 1.54E-56    | 7.94507822  | 2.859077273 | 1.55E-18    | ECM_GLYCOPROTEINS | 1.216129467 | 2.778895938 |
| VWA9     | 10.7910993  | 10.61640365 | 1.01E-14    | 10.7910993  | 0           | 3.42E-08    | ECM_GLYCOPROTEINS | 1.016455256 | Inf         |
| VWCE     | 8.201612881 | 5.711136161 | 1.02E-124   | 8.201612881 | 7.819661364 | 1.29E-58    | ECM_GLYCOPROTEINS | 1.436073778 | 1.04884502  |
| VWDE     | 6.007568852 | 4.160367421 | 5.18E-40    | 6.007568852 | 0.554190909 | 2.82E-65    | ECM_GLYCOPROTEINS | 1.443999591 | 10.84025153 |
| XCL2     | 4.22536089  | 3.451260562 | 3.25E-17    | 4.22536089  | 0.949342045 | 2.95E-07    | SECRETED_FACTORS  | 1.224294954 | 4.450830878 |
| ZP3      | 9.301655738 | 7.719755915 | 4.79E-105   | 9.301655738 | 6.596473864 | 1.69E-11    | ECM_GLYCOPROTEINS | 1.204915782 | 1.41009514  |

**Pancreatic Adenocarcinoma (PAAD)**

| Signature genes | Expression in tumor | Expression in rest of Pan-Cancer | P-value     | Expression in tumor | Expression in normal tissue | P-value     | Matrisome category | Fold change vs. Pan-Cancer | Fold change vs. normal |
|-----------------|---------------------|----------------------------------|-------------|---------------------|-----------------------------|-------------|--------------------|----------------------------|------------------------|
| ADAM15          | 12.47848361         | 12.16121957                      | 1.22E-05    | 12.47848361         | 11.6925                     | 0.021874399 | ECM_REGULATORS     | 1.026088176                | 1.067221177            |
| ANXA10          | 10.25956066         | 2.19835954                       | 3.56E-229   | 10.25956066         | 6.01345                     | 0.005978883 | ECM_AFFILIATED     | 4.666916612                | 1.706102263            |
| ANXA13          | 7.964411475         | 3.905186782                      | 8.71E-60    | 7.964411475         | 4.871275                    | 0.00754829  | ECM_AFFILIATED     | 2.039444442                | 1.634974719            |
| AREG            | 9.449830055         | 6.979811355                      | 1.37E-24    | 9.449830055         | 6.7669                      | 0.002946447 | SECRETED_FACTORS   | 1.353880438                | 1.396478455            |
| BTC             | 7.506886885         | 6.44669637                       | 1.33E-09    | 7.506886885         | 6.16245                     | 0.004663966 | SECRETED_FACTORS   | 1.164454855                | 1.218165971            |
| CCL15           | 5.696214754         | 2.678599631                      | 7.29E-33    | 5.696214754         | 3.000075                    | 0.020529667 | SECRETED_FACTORS   | 2.126564451                | 1.898690784            |
| COL17A1         | 11.72529727         | 7.803316101                      | 1.73E-36    | 11.72529727         | 7.194725                    | 0.00271202  | COLLAGENS          | 1.502604421                | 1.629707497            |
| CST4            | 5.105444809         | 2.105719187                      | 3.75E-57    | 5.105444809         | 2.9555                      | 0.046154684 | ECM_REGULATORS     | 2.424561091                | 1.727438609            |
| CTSE            | 13.51801257         | 4.862236995                      | 1.02E-152   | 13.51801257         | 10.150975                   | 0.035408968 | ECM_REGULATORS     | 2.780204375                | 1.331695977            |
| DMBT1           | 11.3447694          | 5.089390596                      | 6.77E-87    | 11.3447694          | 7.027675                    | 0.010792403 | ECM_GLYCOPROTEINS  | 2.229101733                | 1.614299096            |
| EREG            | 6.938223497         | 4.273947118                      | 4.80E-25    | 6.938223497         | 3.007625                    | 0.00387164  | SECRETED_FACTORS   | 1.623376075                | 2.306877851            |
| F12             | 7.891927322         | 7.222801504                      | 0.000281678 | 7.891927322         | 5.991525                    | 0.005490922 | ECM_REGULATORS     | 1.09264076                 | 1.31718174             |
| LAMA3           | 12.65140328         | 9.789260025                      | 2.76E-47    | 12.65140328         | 10.421375                   | 0.004360101 | BASEMENT_MEMBRANES | 1.292375853                | 1.213985993            |
| LAMA3           | 12.65140328         | 9.789260025                      | 2.76E-47    | 12.65140328         | 10.421375                   | 0.004360101 | ECM_GLYCOPROTEINS  | 1.292375853                | 1.213985993            |
| MMP28           | 10.03943825         | 7.18999178                       | 1.55E-66    | 10.03943825         | 8.128275                    | 0.007583901 | ECM_REGULATORS     | 1.396307334                | 1.235125319            |
| MMP3            | 6.17977377          | 4.550021031                      | 1.64E-08    | 6.17977377          | 3.7135                      | 0.021260895 | ECM_REGULATORS     | 1.35818576                 | 1.664137275            |
| MUC1            | 14.19635902         | 10.81774834                      | 2.95E-43    | 14.19635902         | 11.121575                   | 0.002960313 | ECM_AFFILIATED     | 1.312321064                | 1.276470196            |
| MUC13           | 11.98540492         | 4.689187539                      | 4.03E-106   | 11.98540492         | 8.1559                      | 0.000651207 | ECM_AFFILIATED     | 2.555966214                | 1.469537993            |
| MUC17           | 8.533389071         | 1.449220468                      | 3.23E-169   | 8.533389071         | 4.063075                    | 0.031406015 | ECM_AFFILIATED     | 5.88826149                 | 2.100229277            |
| MUC4            | 10.1772306          | 6.66719145                       | 1.38E-34    | 10.1772306          | 6.927825                    | 0.019157022 | ECM_AFFILIATED     | 1.526464431                | 1.469036906            |
| MUC5AC          | 11.6032153          | 3.069593129                      | 2.55E-173   | 11.6032153          | 5.1649                      | 0.002076761 | ECM_AFFILIATED     | 3.780049933                | 2.246551782            |
| MUC5B           | 12.25629235         | 5.980757735                      | 5.79E-77    | 12.25629235         | 8.151925                    | 0.007962225 | ECM_AFFILIATED     | 2.049287547                | 1.503484435            |
| NDNF            | 7.559861202         | 5.602530134                      | 5.48E-18    | 7.559861202         | 5.53135                     | 0.032435725 | ECM_GLYCOPROTEINS  | 1.349365558                | 1.366729858            |
| P4HA2           | 11.43687541         | 10.69032027                      | 2.73E-12    | 11.43687541         | 10.6788                     | 0.021159716 | ECM_REGULATORS     | 1.069834684                | 1.07098882             |
| PI3             | 8.870198907         | 5.892774864                      | 1.59E-18    | 8.870198907         | 6.222275                    | 0.042465057 | ECM_REGULATORS     | 1.505266892                | 1.42555559             |
| PLXNA2          | 11.42138689         | 10.51896031                      | 9.05E-21    | 11.42138689         | 9.95755                     | 0.000128787 | ECM_AFFILIATED     | 1.085790473                | 1.147007736            |
| PRSS12          | 9.131220765         | 6.801189645                      | 1.18E-33    | 9.131220765         | 7.724125                    | 0.036134263 | ECM_REGULATORS     | 1.3425917                  | 1.182168953            |
| PRSS3           | 10.67896612         | 4.432121497                      | 1.01E-111   | 10.67896612         | 7.252875                    | 0.008467159 | ECM_REGULATORS     | 2.409447965                | 1.472376971            |
| REG4            | 10.5203             | 2.644548525                      | 1.16E-176   | 10.5203             | 5.901775                    | 0.026885294 | ECM_AFFILIATED     | 3.978108135                | 1.782565415            |
| SDC1            | 13.45909508         | 12.44859451                      | 1.78E-07    | 13.45909508         | 11.597575                   | 0.005448054 | ECM_AFFILIATED     | 1.081173869                | 1.160509424            |
| SEMA4G          | 10.28006339         | 8.468645953                      | 1.94E-36    | 10.28006339         | 8.635625                    | 0.007155921 | ECM_AFFILIATED     | 1.213896938                | 1.190424942            |
| SERPINB3        | 6.098840437         | 3.342312908                      | 4.81E-16    | 6.098840437         | 2.614575                    | 0.048445434 | ECM_REGULATORS     | 1.824736524                | 2.332631666            |
| SERPINB4        | 4.591914208         | 2.714413956                      | 7.76E-11    | 4.591914208         | 1.7921                      | 0.038341617 | ECM_REGULATORS     | 1.69167794                 | 2.562309139            |
| SERPINB5        | 10.00606831         | 5.996560472                      | 2.04E-27    | 10.00606831         | 4.419725                    | 7.75E-05    | ECM_REGULATORS     | 1.668634604                | 2.263957216            |
| SFTA2           | 8.554688525         | 3.041460899                      | 6.77E-96    | 8.554688525         | 5.757675                    | 0.030760845 | ECM_AFFILIATED     | 2.812690615                | 1.485788712            |
| SLPI            | 12.15946612         | 9.593511694                      | 4.43E-18    | 12.15946612         | 9.547225                    | 0.004292805 | ECM_REGULATORS     | 1.267467691                | 1.273612607            |
| TINAG           | 4.450571585         | 1.897891246                      | 7.82E-25    | 4.450571585         | 1.072075                    | 0.007613601 | ECM_GLYCOPROTEINS  | 2.345008753                | 4.151362157            |
| WNT7B           | 9.150920219         | 7.192302019                      | 6.03E-13    | 9.150920219         | 6.636525                    | 0.006511436 | SECRETED_FACTORS   | 1.272321462                | 1.378872259            |
| VWA3B           | 4.756512022         | 3.223021254                      | 2.51E-19    | 4.756512022         | 2.997125                    | 0.014354663 | ECM_GLYCOPROTEINS  | 1.475792943                | 1.587024906            |

**Pheochromocytoma and paraganglioma (PCPG)**

| Signature genes | Expression in tumor | Expression in rest of Pan-Cancer | P-value     | Expression in tumor | Expression in normal tissue | P-value     | Matrisome category | Fold change vs. Pan-Cancer | Fold change vs. normal |
|-----------------|---------------------|----------------------------------|-------------|---------------------|-----------------------------|-------------|--------------------|----------------------------|------------------------|
| ADAM23          | 10.15726919         | 6.750581499                      | 3.40E-65    | 10.15726919         | 7.9768                      | 0.001439183 | ECM_REGULATORS     | 1.504650998                | 1.273351368            |
| ADAM29          | 2.209852432         | 0.994209406                      | 6.25E-30    | 2.209852432         | 0                           | 0.026336233 | ECM_REGULATORS     | 2.222723321                | Inf                    |
| ADAMTS13        | 7.369545405         | 7.01204008                       | 0.000323348 | 7.369545405         | 5.7199                      | 0.001653674 | ECM_REGULATORS     | 1.050984495                | 1.288404588            |
| ADAMTS19        | 8.063711351         | 2.179762464                      | 1.17E-207   | 8.063711351         | 3.587333333                 | 0.001795953 | ECM_REGULATORS     | 3.699353249                | 2.247828847            |
| ADAMTS9         | 9.734160541         | 8.997890245                      | 3.98E-08    | 9.734160541         | 8.578733333                 | 0.044308842 | ECM_REGULATORS     | 1.081826992                | 1.134685059            |
| AMH             | 6.411084865         | 4.821796758                      | 7.88E-19    | 6.411084865         | 2.881466667                 | 0.00096161  | SECRETED_FACTORS   | 1.329604956                | 2.224938063            |
| ANGPT2          | 9.136489189         | 8.567633062                      | 1.25E-06    | 9.136489189         | 4.7242                      | 2.22E-05    | SECRETED_FACTORS   | 1.066395949                | 1.933975951            |
| ANXA6           | 13.59219568         | 12.23052098                      | 1.84E-50    | 13.59219568         | 12.90676667                 | 0.007946362 | ECM_AFFILIATED     | 1.111334153                | 1.053106175            |
| BCAN            | 9.391909189         | 4.482181285                      | 1.91E-56    | 9.391909189         | 6.0429                      | 0.016060788 | PROTEOGLYCANS      | 2.095388069                | 1.554205628            |
| BMP7            | 12.03806703         | 7.957072209                      | 2.50E-49    | 12.03806703         | 6.358666667                 | 2.90E-05    | SECRETED_FACTORS   | 1.512876434                | 1.893174726            |
| BMP8B           | 9.906523784         | 7.758192273                      | 3.05E-65    | 9.906523784         | 5.561533333                 | 8.85E-06    | SECRETED_FACTORS   | 1.276911352                | 1.781257648            |
| BMPER           | 6.454091351         | 5.058993768                      | 1.86E-16    | 6.454091351         | 4.6716                      | 0.043513461 | ECM_GLYCOPROTEINS  | 1.275765824                | 1.38155907             |
| C1QL1           | 11.22214757         | 5.801038827                      | 5.38E-130   | 11.22214757         | 6.225066667                 | 0.001613579 | ECM_AFFILIATED     | 1.934506543                | 1.802735323            |
| C1QL4           | 4.840688108         | 3.566869113                      | 7.43E-10    | 4.840688108         | 1.721166667                 | 0.012588041 | ECM_AFFILIATED     | 1.357125242                | 2.812445884            |
| C1QTNF9         | 2.57108973          | 2.270456455                      | 0.013058798 | 2.57108973          | 0.7714                      | 0.024787353 | ECM_AFFILIATED     | 1.132410941                | 3.333017539            |
| CBLN1           | 8.552329189         | 3.918867463                      | 6.05E-121   | 8.552329189         | 4.221                       | 0.002228238 | SECRETED_FACTORS   | 2.182347137                | 2.026138164            |
| CLEC4F          | 3.626871892         | 3.280324267                      | 0.012425641 | 3.626871892         | 0.716166667                 | 0.008184551 | ECM_AFFILIATED     | 1.105644319                | 5.064284699            |
| COL11A2         | 6.850741081         | 5.97384306                       | 4.67E-08    | 6.850741081         | 4.613066667                 | 0.008344912 | COLLAGENS          | 1.146789598                | 1.485073071            |
| COL21A1         | 6.988367027         | 6.140055465                      | 2.63E-07    | 6.988367027         | 5.0952                      | 0.043785709 | COLLAGENS          | 1.138160244                | 1.371558924            |
| COL22A1         | 11.1239173          | 6.463970763                      | 2.41E-117   | 11.1239173          | 5.7366                      | 2.67E-05    | COLLAGENS          | 1.720910831                | 1.93911329             |
| COL4A1          | 13.74791946         | 13.18093568                      | 5.59E-05    | 13.74791946         | 12.03913333                 | 0.025130509 | COLLAGENS          | 1.043015442                | 1.141935975            |
| COL4A1          | 13.74791946         | 13.18093568                      | 5.59E-05    | 13.74791946         | 12.03913333                 | 0.025130509 | BASEMENT_MEMBRANES | 1.043015442                | 1.141935975            |
| COL9A1          | 4.643000541         | 3.953880654                      | 0.001198299 | 4.643000541         | 2.156766667                 | 0.024410971 | COLLAGENS          | 1.174289501                | 2.152759783            |
| COLQ            | 7.247843243         | 6.257493273                      | 8.00E-26    | 7.247843243         | 5.992666667                 | 0.043031221 | BASEMENT_MEMBRANES | 1.158266246                | 1.209452093            |
| COLQ            | 7.247843243         | 6.257493273                      | 8.00E-26    | 7.247843243         | 5.992666667                 | 0.043031221 | ECM_GLYCOPROTEINS  | 1.158266246                | 1.209452093            |
| CRELD1          | 11.62089405         | 10.22388406                      | 2.03E-102   | 11.62089405         | 10.69396667                 | 0.011900322 | ECM_GLYCOPROTEINS  | 1.136641807                | 1.086677602            |
| CSPG5           | 7.322000541         | 6.030864978                      | 9.68E-12    | 7.322000541         | 3.8906                      | 5.94E-07    | ECM_AFFILIATED     | 1.214087957                | 1.881972071            |
| EGFLAM          | 11.88806162         | 7.551577655                      | 4.60E-254   | 11.88806162         | 8.518166667                 | 0.001140655 | ECM_GLYCOPROTEINS  | 1.574248742                | 1.395612705            |
| ELN             | 11.19355027         | 10.03016328                      | 5.01E-12    | 11.19355027         | 9.377833333                 | 0.034166501 | ECM_GLYCOPROTEINS  | 1.115988839                | 1.193617958            |
| ESM1            | 9.778595676         | 7.66373014                       | 9.23E-30    | 9.778595676         | 7.1215                      | 0.031357189 | PROTEOGLYCANS      | 1.275957725                | 1.37310899             |
| FGF1            | 9.605981622         | 7.082217501                      | 1.08E-40    | 9.605981622         | 5.486666667                 | 0.000279715 | SECRETED_FACTORS   | 1.356352247                | 1.750786444            |
| FGF14           | 10.42451081         | 5.495114065                      | 1.92E-164   | 10.42451081         | 5.5986                      | 5.85E-09    | SECRETED_FACTORS   | 1.89705085                 | 1.861985284            |
| FGF2            | 9.134366486         | 7.79258444                       | 2.05E-18    | 9.134366486         | 7.6043                      | 0.015685606 | SECRETED_FACTORS   | 1.17218704                 | 1.201210695            |
| FRAS1           | 8.939234595         | 8.390863269                      | 0.002989113 | 8.939234595         | 6.105133333                 | 0.003690267 | ECM_GLYCOPROTEINS  | 1.065353386                | 1.464216112            |
| GAS6            | 12.86997784         | 11.71689571                      | 3.26E-27    | 12.86997784         | 11.86096667                 | 0.004534005 | ECM_GLYCOPROTEINS  | 1.098411914                | 1.085069894            |
| HMCN2           | 7.629457297         | 6.346645117                      | 1.35E-13    | 7.629457297         | 4.795066667                 | 0.008732534 | ECM_GLYCOPROTEINS  | 1.202124454                | 1.591105573            |
| HTRA1           | 12.72659568         | 11.80214542                      | 1.87E-11    | 12.72659568         | 11.42356667                 | 0.031086826 | ECM_REGULATORS     | 1.078329001                | 1.114064989            |
| IGFBPL1         | 7.894916757         | 3.089620899                      | 3.90E-169   | 7.894916757         | 2.154766667                 | 2.75E-10    | ECM_GLYCOPROTEINS  | 2.555302743                | 3.663931171            |
| LOXL3           | 10.43425297         | 7.800972054                      | 2.24E-132   | 10.43425297         | 8.027633333                 | 0.001143281 | ECM_REGULATORS     | 1.337558051                | 1.299791924            |
| MMP15           | 11.6785427          | 10.77564726                      | 1.13E-15    | 11.6785427          | 9.0148                      | 4.34E-09    | ECM_REGULATORS     | 1.083790367                | 1.295485502            |
| MMP16           | 8.547111892         | 6.812869103                      | 2.31E-19    | 8.547111892         | 5.834133333                 | 0.001287375 | ECM_REGULATORS     | 1.254553957                | 1.465018265            |
| MMP17           | 7.673587027         | 6.575559765                      | 1.12E-10    | 7.673587027         | 4.764433333                 | 0.007934962 | ECM_REGULATORS     | 1.166986128                | 1.610598048            |

|          |             |             |             |             |             |             |                    |             |             |
|----------|-------------|-------------|-------------|-------------|-------------|-------------|--------------------|-------------|-------------|
| MMP24    | 9.015028649 | 6.919515463 | 1.66E-31    | 9.015028649 | 5.904566667 | 2.68E-06    | ECM_REGULATORS     | 1.302841029 | 1.526789205 |
| MUC12    | 5.636061081 | 4.994126509 | 0.004612188 | 5.636061081 | 1.6878      | 0.010214098 | ECM_AFFILIATED     | 1.128537908 | 3.339294396 |
| NELL1    | 5.143024865 | 3.295989652 | 1.78E-14    | 5.143024865 | 1.549133333 | 0.047639032 | ECM_GLYCOPROTEINS  | 1.560388656 | 3.319936867 |
| NELL2    | 9.887304865 | 7.804519588 | 2.59E-25    | 9.887304865 | 6.0374      | 0.011320177 | ECM_GLYCOPROTEINS  | 1.26686912  | 1.637675964 |
| NTN3     | 2.813151351 | 2.098356416 | 5.05E-09    | 2.813151351 | 0.677933333 | 0.010389194 | ECM_GLYCOPROTEINS  | 1.34064515  | 4.149598807 |
| NTN3     | 2.813151351 | 2.098356416 | 5.05E-09    | 2.813151351 | 0.677933333 | 0.010389194 | BASEMENT_MEMBRANES | 1.34064515  | 4.149598807 |
| NTNG1    | 8.858544865 | 4.220461551 | 3.66E-98    | 8.858544865 | 3.365066667 | 0.000235649 | BASEMENT_MEMBRANES | 2.09895168  | 2.63250204  |
| NTNG1    | 8.858544865 | 4.220461551 | 3.66E-98    | 8.858544865 | 3.365066667 | 0.000235649 | ECM_GLYCOPROTEINS  | 2.09895168  | 2.63250204  |
| P4HA2    | 11.47875568 | 10.68942327 | 1.07E-13    | 11.47875568 | 8.288166667 | 8.03E-09    | ECM_REGULATORS     | 1.073842376 | 1.384957149 |
| P4HTM    | 12.76905459 | 10.26358265 | 2.13E-154   | 12.76905459 | 11.442      | 0.000262902 | ECM_REGULATORS     | 1.244112804 | 1.115980999 |
| PARM1    | 14.17438595 | 10.00073266 | 4.20E-138   | 14.17438595 | 11.3275     | 1.86E-05    | ECM_AFFILIATED     | 1.417334752 | 1.251325177 |
| PLOD3    | 11.96138757 | 11.68413105 | 0.000385585 | 11.96138757 | 10.75793333 | 0.000129464 | ECM_REGULATORS     | 1.023729323 | 1.111866675 |
| PLXDC1   | 9.237015676 | 8.821530489 | 7.93E-05    | 9.237015676 | 7.1762      | 0.005854972 | ECM_AFFILIATED     | 1.047098991 | 1.287173668 |
| PLXNA2   | 11.29858811 | 10.52099029 | 5.84E-16    | 11.29858811 | 7.984566667 | 3.97E-07    | ECM_AFFILIATED     | 1.073909185 | 1.415053387 |
| PLXNA3   | 12.38694108 | 10.70751952 | 6.05E-97    | 12.38694108 | 9.941233333 | 2.37E-09    | ECM_AFFILIATED     | 1.156845062 | 1.246016532 |
| PLXNA4   | 9.218675676 | 6.903955669 | 8.57E-35    | 9.218675676 | 6.601233333 | 0.032718968 | ECM_AFFILIATED     | 1.33527446  | 1.396508078 |
| PLXNC1   | 11.77124324 | 9.625073238 | 5.95E-72    | 11.77124324 | 8.9879      | 0.000252737 | ECM_AFFILIATED     | 1.222977005 | 1.309676703 |
| POMZP3   | 8.984627568 | 8.770460571 | 0.00201205  | 8.984627568 | 8.0697      | 0.017954048 | ECM_GLYCOPROTEINS  | 1.024419128 | 1.113378139 |
| PRSS3    | 10.25086703 | 4.438596418 | 1.05E-97    | 10.25086703 | 4.5678      | 2.23E-05    | ECM_REGULATORS     | 2.309483914 | 2.244158463 |
| PXDNL    | 4.879395135 | 4.525718948 | 0.019049931 | 4.879395135 | 1.191       | 0.000143555 | ECM_GLYCOPROTEINS  | 1.078148067 | 4.096889282 |
| RSPO4    | 7.830937838 | 4.132178548 | 7.23E-75    | 7.830937838 | 3.5728      | 0.011418238 | ECM_GLYCOPROTEINS  | 1.895111198 | 2.191820935 |
| SDC2     | 12.40801514 | 11.08943676 | 8.31E-19    | 12.40801514 | 9.746033333 | 1.73E-05    | ECM_AFFILIATED     | 1.118903999 | 1.273134896 |
| SEMA3G   | 9.77027027  | 8.245383178 | 3.24E-36    | 9.77027027  | 7.9428      | 0.012954564 | ECM_AFFILIATED     | 1.184938293 | 1.230078848 |
| SEMA4F   | 9.897177838 | 8.64873478  | 1.56E-61    | 9.897177838 | 7.4915      | 7.67E-06    | ECM_AFFILIATED     | 1.144349791 | 1.321120982 |
| SEMA5B   | 7.747103243 | 6.875239711 | 8.04E-07    | 7.747103243 | 6.275633333 | 0.039707245 | ECM_AFFILIATED     | 1.126812092 | 1.234473531 |
| SEMA6C   | 10.22548216 | 8.340432867 | 1.32E-86    | 10.22548216 | 7.028133333 | 1.89E-09    | ECM_AFFILIATED     | 1.226013365 | 1.45493571  |
| SEMA6D   | 9.26345027  | 7.734931101 | 3.03E-22    | 9.26345027  | 6.0081      | 1.60E-06    | ECM_AFFILIATED     | 1.197612513 | 1.541826912 |
| SERPINE2 | 11.39018649 | 10.72928134 | 0.000131694 | 11.39018649 | 8.789033333 | 0.013229428 | ECM_REGULATORS     | 1.061598268 | 1.295954408 |
| SERPINI1 | 10.84008162 | 7.954987905 | 1.71E-125   | 10.84008162 | 7.8606      | 2.79E-06    | ECM_REGULATORS     | 1.362677323 | 1.379039974 |
| SFTPC    | 4.442125405 | 2.577904349 | 4.26E-10    | 4.442125405 | 2.310866667 | 0.039079345 | ECM_AFFILIATED     | 1.723153696 | 1.92227681  |
| SFTPD    | 6.90176     | 5.259608979 | 8.59E-14    | 6.90176     | 2.418933333 | 3.92E-11    | ECM_AFFILIATED     | 1.312219222 | 2.853224562 |
| SLIT3    | 13.37917622 | 9.668866259 | 2.86E-106   | 13.37917622 | 11.43516667 | 0.007124135 | ECM_GLYCOPROTEINS  | 1.383737851 | 1.17000273  |
| SPOCK2   | 14.14896054 | 10.60871472 | 1.01E-112   | 14.14896054 | 10.583      | 0.000102788 | PROTEOGLYCANS      | 1.333711097 | 1.336951766 |
| SPOCK3   | 11.90596919 | 3.707118016 | 1.65E-216   | 11.90596919 | 6.974433333 | 0.000318986 | PROTEOGLYCANS      | 3.211650975 | 1.707087676 |
| TECTA    | 7.924528108 | 5.122050447 | 6.88E-155   | 7.924528108 | 6.03        | 8.13E-06    | ECM_GLYCOPROTEINS  | 1.547139801 | 1.314183766 |
| THBS3    | 10.26385081 | 9.852804514 | 6.32E-08    | 10.26385081 | 8.5171      | 4.49E-06    | ECM_GLYCOPROTEINS  | 1.04171871  | 1.205087508 |
| TLL2     | 6.556991892 | 4.882329344 | 5.76E-36    | 6.556991892 | 1.8899      | 6.51E-05    | ECM_REGULATORS     | 1.34300483  | 3.46949145  |
| TNR      | 10.0256827  | 3.439133799 | 7.72E-148   | 10.0256827  | 5.1753      | 0.000275786 | ECM_GLYCOPROTEINS  | 2.915176695 | 1.937217688 |
| WFIKKN1  | 5.993617838 | 5.01520065  | 4.90E-16    | 5.993617838 | 3.023966667 | 1.31E-05    | SECRETED_FACTORS   | 1.195090337 | 1.982038329 |
| WNT10A   | 6.717854054 | 5.955984663 | 0.000201986 | 6.717854054 | 0.9246      | 0.000316304 | SECRETED_FACTORS   | 1.127916614 | 7.265686842 |
| WNT6     | 6.908831351 | 3.787265065 | 3.09E-87    | 6.908831351 | 3.946366667 | 0.008433014 | SECRETED_FACTORS   | 1.824227043 | 1.75068156  |
| WNT8B    | 3.780857297 | 1.750456843 | 6.69E-70    | 3.780857297 | 1.090333333 | 0.022372075 | SECRETED_FACTORS   | 2.159926028 | 3.467615987 |
| VWA3A    | 3.748077838 | 2.928454397 | 1.95E-06    | 3.748077838 | 1.369266667 | 0.027707901 | ECM_GLYCOPROTEINS  | 1.279882603 | 2.737288455 |
| VWA5B1   | 5.173526486 | 1.851240827 | 2.30E-91    | 5.173526486 | 0.762466667 | 0.000686614 | ECM_GLYCOPROTEINS  | 2.794626399 | 6.785249392 |
| VWA7     | 8.472305946 | 6.558491642 | 2.39E-46    | 8.472305946 | 3.6214      | 1.14E-06    | ECM_GLYCOPROTEINS  | 1.291807081 | 2.339511224 |
| VWDE     | 6.871858919 | 4.220677286 | 1.19E-36    | 6.871858919 | 2.9824      | 0.007764324 | ECM_GLYCOPROTEINS  | 1.62814128  | 2.304137245 |

|            |             |             |          |             |             |            |                   |            |             |
|------------|-------------|-------------|----------|-------------|-------------|------------|-------------------|------------|-------------|
| <b>VWF</b> | 13.35014973 | 12.18628817 | 1.73E-24 | 13.35014973 | 10.47066667 | 0.00078012 | ECM_GLYCOPROTEINS | 1.09550583 | 1.275004749 |
|------------|-------------|-------------|----------|-------------|-------------|------------|-------------------|------------|-------------|

**Prostate Adenocarcinoma (PRAD)**

| Signature genes | Expression in tumor | Expression in rest of Pan-Cancer | P-value     | Expression in tumor | Expression in normal tissue | P-value     | Matrisome category | Fold change vs. Pan-Cancer | Fold change vs. normal |
|-----------------|---------------------|----------------------------------|-------------|---------------------|-----------------------------|-------------|--------------------|----------------------------|------------------------|
| ADAM15          | 12.56629069         | 12.14472699                      | 4.29E-23    | 12.56629069         | 12.10831538                 | 5.83E-10    | ECM_REGULATORS     | 1.034711665                | 1.037823206            |
| ADAM2           | 4.134672993         | 0.362217648                      | 0           | 4.134672993         | 1.482911538                 | 4.51E-12    | ECM_REGULATORS     | 11.41488555                | 2.78821284             |
| ADAM21          | 3.768488504         | 2.877626653                      | 2.41E-43    | 3.768488504         | 2.338698077                 | 1.19E-09    | ECM_REGULATORS     | 1.309582152                | 1.611361698            |
| ADAM7           | 4.150734854         | 0.313866194                      | 0           | 4.150734854         | 3.165875                    | 0.020582095 | ECM_REGULATORS     | 13.22453624                | 1.311086146            |
| ADAMTS13        | 7.540296533         | 6.989568397                      | 6.54E-21    | 7.540296533         | 7.038532692                 | 3.25E-05    | ECM_REGULATORS     | 1.078792867                | 1.071288131            |
| AMELY           | 1.977266058         | 0.168306882                      | 0           | 1.977266058         | 1.52765                     | 0.010309323 | ECM_GLYCOPROTEINS  | 11.74798104                | 1.294318763            |
| ANGPTL3         | 3.583137409         | 2.322680441                      | 1.76E-19    | 3.583137409         | 1.687676923                 | 8.37E-09    | SECRETED_FACTORS   | 1.542673433                | 2.123118092            |
| ANXA3           | 11.4790792          | 9.036710645                      | 7.77E-98    | 11.4790792          | 11.05941346                 | 0.002989247 | ECM_AFFILIATED     | 1.270271855                | 1.037946473            |
| ANXA5           | 13.67889854         | 13.36582211                      | 4.81E-12    | 13.67889854         | 13.50140192                 | 0.006753936 | ECM_AFFILIATED     | 1.023423656                | 1.013146532            |
| BGLAP           | 4.259316423         | 4.091953305                      | 0.008138452 | 4.259316423         | 3.490090385                 | 6.72E-05    | ECM_GLYCOPROTEINS  | 1.040900544                | 1.220402899            |
| BMP6            | 7.630523905         | 6.598832126                      | 7.14E-42    | 7.630523905         | 6.952392308                 | 0.000753369 | SECRETED_FACTORS   | 1.156344602                | 1.097539317            |
| BMP8A           | 4.591429015         | 4.232100533                      | 1.52E-05    | 4.591429015         | 3.990276923                 | 0.000348302 | SECRETED_FACTORS   | 1.084905469                | 1.150654229            |
| C17orf58        | 9.141172263         | 8.740792132                      | 1.65E-24    | 9.141172263         | 8.603959615                 | 1.04E-07    | ECM_REGULATORS     | 1.045805932                | 1.062437839            |
| C1QTNF9         | 3.549381752         | 2.205537056                      | 8.72E-80    | 3.549381752         | 3.056867308                 | 0.006489066 | ECM_AFFILIATED     | 1.609304973                | 1.161117378            |
| C1QTNF9B        | 4.549483394         | 2.16900492                       | 1.07E-245   | 4.549483394         | 3.625119231                 | 0.000765292 | SECRETED_FACTORS   | 2.09749796                 | 1.254988624            |
| CBLN3           | 7.151815876         | 6.728865872                      | 6.54E-15    | 7.151815876         | 6.919782692                 | 0.014634176 | SECRETED_FACTORS   | 1.062856061                | 1.03353186             |
| CHRD            | 8.505031204         | 7.603469806                      | 6.79E-25    | 8.505031204         | 7.650155769                 | 2.87E-07    | SECRETED_FACTORS   | 1.118572365                | 1.111746148            |
| CLEC19A         | 0.479589051         | 0.233499255                      | 5.87E-21    | 0.479589051         | 0.218098077                 | 0.004490824 | ECM_AFFILIATED     | 2.053921115                | 2.198960476            |
| COL12A1         | 11.61680091         | 11.28133064                      | 0.002908034 | 11.61680091         | 11.17878462                 | 0.032141244 | COLLAGENS          | 1.029736765                | 1.039182819            |
| COL26A1         | 8.418630109         | 4.616069192                      | 1.53E-214   | 8.418630109         | 7.593005769                 | 6.46E-05    | COLLAGENS          | 1.823766014                | 1.10873485             |
| COL28A1         | 7.639440876         | 5.460073659                      | 4.27E-100   | 7.639440876         | 6.907826923                 | 0.000477008 | COLLAGENS          | 1.39914612                 | 1.105910869            |
| COL2A1          | 7.128061861         | 4.01038687                       | 3.66E-99    | 7.128061861         | 5.250392308                 | 0.000418909 | COLLAGENS          | 1.77740006                 | 1.35762462             |
| COL8A1          | 10.06752664         | 9.77603274                       | 0.012559713 | 10.06752664         | 9.683448077                 | 0.032960878 | COLLAGENS          | 1.029817198                | 1.039663409            |
| COL9A2          | 11.81276861         | 8.581879525                      | 2.55E-275   | 11.81276861         | 10.63039808                 | 1.16E-05    | COLLAGENS          | 1.376478029                | 1.111225424            |
| COLEC12         | 11.44653285         | 8.34171468                       | 1.08E-218   | 11.44653285         | 10.26007115                 | 1.45E-13    | ECM_AFFILIATED     | 1.372203832                | 1.115638739            |
| COMP            | 9.557698358         | 7.104933444                      | 1.04E-49    | 9.557698358         | 7.236878846                 | 5.44E-12    | ECM_GLYCOPROTEINS  | 1.34521997                 | 1.320693432            |
| CRELD1          | 11.41088631         | 10.18444042                      | 2.54E-229   | 11.41088631         | 11.17338077                 | 0.000253054 | ECM_GLYCOPROTEINS  | 1.120423494                | 1.021256373            |
| CRELD2          | 11.05154106         | 10.35796178                      | 5.20E-82    | 11.05154106         | 10.53314423                 | 8.37E-08    | ECM_GLYCOPROTEINS  | 1.066960981                | 1.049215772            |
| CSPG5           | 6.38787281          | 6.035213482                      | 0.001676539 | 6.38787281          | 5.442238462                 | 2.46E-09    | ECM_AFFILIATED     | 1.058433613                | 1.173758345            |
| CST2            | 6.21092354          | 3.461879706                      | 4.79E-111   | 6.21092354          | 3.768309615                 | 6.92E-11    | ECM_REGULATORS     | 1.794089936                | 1.648198841            |
| CXCL11          | 7.332879562         | 6.430271868                      | 1.31E-14    | 7.332879562         | 5.970665385                 | 3.42E-08    | SECRETED_FACTORS   | 1.140368512                | 1.228151151            |
| EGF             | 7.954211131         | 5.399798551                      | 4.98E-94    | 7.954211131         | 7.319434615                 | 0.004546676 | SECRETED_FACTORS   | 1.473057014                | 1.086724802            |
| ELFN2           | 1.661190876         | 1.092207828                      | 7.22E-17    | 1.661190876         | 0.613257692                 | 8.90E-09    | ECM_AFFILIATED     | 1.520947601                | 2.708797455            |
| FAM20C          | 10.87980985         | 10.66803229                      | 0.000357648 | 10.87980985         | 10.54674038                 | 0.000186006 | ECM_REGULATORS     | 1.019851605                | 1.031580323            |
| FBLN7           | 7.832843066         | 7.265773589                      | 1.60E-13    | 7.832843066         | 7.60685                     | 0.045782132 | ECM_GLYCOPROTEINS  | 1.078046676                | 1.029709152            |
| FGF13           | 10.25233339         | 7.112633575                      | 7.04E-241   | 10.25233339         | 9.548055769                 | 5.04E-09    | SECRETED_FACTORS   | 1.441425779                | 1.073761365            |
| FGF17           | 3.781531569         | 3.084250689                      | 4.51E-13    | 3.781531569         | 3.041359615                 | 0.000711838 | SECRETED_FACTORS   | 1.226077887                | 1.243368772            |
| FGF22           | 4.087429197         | 2.386718292                      | 1.00E-158   | 4.087429197         | 3.379028846                 | 1.40E-05    | SECRETED_FACTORS   | 1.712572955                | 1.209646139            |
| FGL1            | 4.632033394         | 2.752218875                      | 3.45E-32    | 4.632033394         | 2.796446154                 | 1.01E-07    | ECM_GLYCOPROTEINS  | 1.683017814                | 1.656399995            |
| FMOD            | 12.54958923         | 10.22524725                      | 7.62E-114   | 12.54958923         | 12.08655                    | 0.025292538 | PROTEOGLYCANS      | 1.227314013                | 1.03831029             |
| FNDC8           | 1.531914416         | 1.155008381                      | 9.93E-18    | 1.531914416         | 1.012915385                 | 3.90E-05    | ECM_GLYCOPROTEINS  | 1.326323203                | 1.512381428            |
| GRIFIN          | 0.356318978         | 0.180962139                      | 3.34E-13    | 0.356318978         | 0.113598077                 | 0.007913077 | ECM_AFFILIATED     | 1.969025013                | 3.136663822            |

|           |             |             |             |             |             |             |                    |             |             |
|-----------|-------------|-------------|-------------|-------------|-------------|-------------|--------------------|-------------|-------------|
| HPX       | 6.061289234 | 4.92717544  | 1.36E-16    | 6.061289234 | 4.853032692 | 6.20E-13    | ECM_AFFILIATED     | 1.230175241 | 1.24896938  |
| HYAL3     | 7.789852007 | 7.072909508 | 5.04E-59    | 7.789852007 | 7.439005769 | 0.000124884 | ECM_REGULATORS     | 1.10136458  | 1.047163055 |
| IGFBP2    | 13.1865135  | 11.47178885 | 6.96E-63    | 13.1865135  | 12.61118654 | 8.09E-06    | ECM_GLYCOPROTEINS  | 1.149473171 | 1.045620368 |
| IMPG1     | 2.899341058 | 2.702249432 | 0.003208785 | 2.899341058 | 2.289076923 | 0.001186588 | PROTEOGLYCANS      | 1.072936134 | 1.266598352 |
| MMP10     | 6.957133942 | 4.567359392 | 2.91E-51    | 6.957133942 | 5.136382692 | 6.33E-10    | ECM_REGULATORS     | 1.523228926 | 1.354481229 |
| MMP26     | 4.537673905 | 0.223018302 | 0           | 4.537673905 | 1.963844231 | 1.98E-17    | ECM_REGULATORS     | 20.34664362 | 2.310607855 |
| MUC2      | 5.850437044 | 2.835298702 | 2.88E-70    | 5.850437044 | 4.459536538 | 6.60E-05    | ECM_AFFILIATED     | 2.063428816 | 1.31189351  |
| NGLY1     | 10.34824635 | 9.952478398 | 8.01E-55    | 10.34824635 | 10.10415192 | 5.02E-06    | ECM_REGULATORS     | 1.039765769 | 1.024157834 |
| NTN5      | 4.677058577 | 3.6458902   | 1.12E-51    | 4.677058577 | 4.105321154 | 0.001417172 | BASEMENT_MEMBRANES | 1.282830343 | 1.139267405 |
| NTN5      | 4.677058577 | 3.6458902   | 1.12E-51    | 4.677058577 | 4.105321154 | 0.001417172 | ECM_GLYCOPROTEINS  | 1.282830343 | 1.139267405 |
| OGFOD2    | 9.273159124 | 9.05689676  | 1.06E-13    | 9.273159124 | 8.968367308 | 2.85E-05    | ECM_REGULATORS     | 1.023878197 | 1.033985207 |
| OVGP1     | 7.824262956 | 6.235019901 | 2.80E-108   | 7.824262956 | 7.207419231 | 8.65E-05    | ECM_AFFILIATED     | 1.254889813 | 1.085584549 |
| P4HA3     | 7.429637044 | 6.320355277 | 2.09E-39    | 7.429637044 | 6.980713462 | 0.012567498 | ECM_REGULATORS     | 1.175509401 | 1.064309126 |
| P4HTM     | 11.41305967 | 10.24684042 | 3.83E-95    | 11.41305967 | 10.85587885 | 4.05E-15    | ECM_REGULATORS     | 1.113812571 | 1.051325262 |
| PCSK6     | 9.762374818 | 9.09198687  | 5.03E-11    | 9.762374818 | 8.078165385 | 1.48E-21    | ECM_REGULATORS     | 1.073733933 | 1.2084891   |
| PLXNA3    | 11.13156971 | 10.71539893 | 4.02E-18    | 11.13156971 | 10.58356923 | 1.81E-10    | ECM_AFFILIATED     | 1.03883857  | 1.051778419 |
| PLXNB2    | 14.09927755 | 13.66023837 | 1.24E-30    | 14.09927755 | 13.95608269 | 0.022355217 | ECM_AFFILIATED     | 1.032139936 | 1.010260391 |
| PLXNB3    | 10.58575438 | 8.221180139 | 6.01E-97    | 10.58575438 | 9.696528846 | 4.68E-14    | ECM_AFFILIATED     | 1.287619806 | 1.091705552 |
| PXDN      | 11.87006752 | 11.23308719 | 1.17E-15    | 11.87006752 | 11.20007308 | 2.62E-07    | ECM_GLYCOPROTEINS  | 1.056705723 | 1.059820542 |
| REG4      | 6.733936131 | 2.564085512 | 2.19E-142   | 6.733936131 | 5.875882692 | 0.005435371 | ECM_AFFILIATED     | 2.626252557 | 1.146029709 |
| SEMA4A    | 11.20312664 | 9.642025475 | 3.93E-108   | 11.20312664 | 10.9995     | 0.007196581 | ECM_AFFILIATED     | 1.161905937 | 1.018512354 |
| SERPINA11 | 5.804103832 | 2.231528997 | 2.81E-126   | 5.804103832 | 3.795336538 | 1.58E-07    | ECM_REGULATORS     | 2.600953804 | 1.529272509 |
| SERPINB6  | 13.22095328 | 11.80610427 | 2.39E-290   | 13.22095328 | 12.768975   | 2.97E-07    | ECM_REGULATORS     | 1.119840464 | 1.035396599 |
| SFTPA2    | 10.35024635 | 3.910794839 | 1.37E-232   | 10.35024635 | 8.824530769 | 1.04E-06    | ECM_AFFILIATED     | 2.646583822 | 1.172894811 |
| SLIT1     | 8.22922354  | 5.280612647 | 6.49E-116   | 8.22922354  | 5.680530769 | 2.56E-18    | ECM_GLYCOPROTEINS  | 1.558384243 | 1.44867159  |
| SMOC2     | 11.8738542  | 9.225192917 | 1.61E-159   | 11.8738542  | 11.49413654 | 0.002439051 | ECM_GLYCOPROTEINS  | 1.28711175  | 1.033035771 |
| SPOCK1    | 13.64525201 | 9.115664866 | 5.92e-323   | 13.64525201 | 12.75562885 | 7.36E-07    | PROTEOGLYCANS      | 1.496901456 | 1.069743575 |
| SPON2     | 14.29966898 | 10.10096099 | 0           | 14.29966898 | 12.26757115 | 2.79E-10    | ECM_GLYCOPROTEINS  | 1.415674112 | 1.165647935 |
| SSPO      | 7.194232847 | 5.460666385 | 6.48E-84    | 7.194232847 | 5.804007692 | 7.04E-12    | ECM_GLYCOPROTEINS  | 1.317464269 | 1.239528482 |
| ST14      | 13.29507026 | 11.63454864 | 3.03E-49    | 13.29507026 | 12.62860577 | 3.55E-14    | ECM_REGULATORS     | 1.142723338 | 1.052774194 |
| TECTB     | 1.510285401 | 0.862595251 | 7.07E-24    | 1.510285401 | 0.963417308 | 0.016485497 | ECM_GLYCOPROTEINS  | 1.75086218  | 1.567633661 |
| TGM2      | 13.40505931 | 12.0307264  | 2.41E-63    | 13.40505931 | 13.08545385 | 0.049005623 | ECM_REGULATORS     | 1.114235239 | 1.024424484 |
| TGM3      | 7.792613504 | 3.787472724 | 9.14E-186   | 7.792613504 | 5.371325    | 1.06E-16    | ECM_REGULATORS     | 2.057470528 | 1.450780488 |
| TGM6      | 0.391103467 | 0.268784918 | 0.003624613 | 0.391103467 | 0.150478846 | 0.017392387 | ECM_REGULATORS     | 1.45507966  | 2.59905945  |
| THBS4     | 10.49291095 | 7.79211316  | 1.75E-109   | 10.49291095 | 8.660148077 | 3.61E-12    | ECM_GLYCOPROTEINS  | 1.346606592 | 1.211631817 |
| TLL2      | 6.334877555 | 4.833412567 | 4.45E-81    | 6.334877555 | 5.997759615 | 0.029956531 | ECM_REGULATORS     | 1.310642836 | 1.056207311 |
| WFIKKN1   | 5.670917883 | 4.997258618 | 3.41E-21    | 5.670917883 | 4.839794231 | 1.36E-06    | SECRETED_FACTORS   | 1.134805764 | 1.171727064 |
| WNT10B    | 4.504440876 | 4.221638565 | 0.000795608 | 4.504440876 | 3.694890385 | 7.26E-07    | SECRETED_FACTORS   | 1.066988755 | 1.219100002 |
| WNT7B     | 9.522419708 | 7.099890572 | 3.58E-52    | 9.522419708 | 9.185626923 | 0.029049445 | SECRETED_FACTORS   | 1.341206545 | 1.036665193 |
| WNT8B     | 3.562463321 | 1.688342399 | 4.35E-171   | 3.562463321 | 3.150292308 | 0.01341573  | SECRETED_FACTORS   | 2.110036047 | 1.1308358   |
| ZP1       | 4.488258029 | 1.994551615 | 1.25E-239   | 4.488258029 | 3.036090385 | 1.34E-08    | ECM_GLYCOPROTEINS  | 2.250259154 | 1.478301849 |
| ZP3       | 8.536071898 | 7.755730315 | 3.12E-33    | 8.536071898 | 7.248788462 | 3.40E-14    | ECM_GLYCOPROTEINS  | 1.100614842 | 1.177586012 |



**Rectum Adenocarcinoma (READ)**

| Signature genes | Expression in tumor | Expression in rest of Pan-Cancer | P-value     | Expression in tumor | Expression in normal tissue | P-value     | Matrisome category | Fold change vs. Pan-Cancer | Fold change vs. normal |
|-----------------|---------------------|----------------------------------|-------------|---------------------|-----------------------------|-------------|--------------------|----------------------------|------------------------|
| ACAN            | 8.121383495         | 6.323319026                      | 4.39E-14    | 8.121383495         | 4.5152                      | 5.36E-10    | PROTEOGLYCANS      | 1.284354539                | 1.798676359            |
| ADAMTS12        | 8.976704854         | 7.868232738                      | 1.90E-06    | 8.976704854         | 6.25624                     | 1.72E-06    | ECM_REGULATORS     | 1.140879427                | 1.434840232            |
| ADAMTS14        | 7.777338835         | 6.534747141                      | 2.43E-09    | 7.777338835         | 6.35842                     | 0.000155491 | ECM_REGULATORS     | 1.190151458                | 1.223155884            |
| ADAMTS2         | 9.875135922         | 9.391779411                      | 0.018401857 | 9.875135922         | 7.97738                     | 0.000365197 | ECM_REGULATORS     | 1.051465914                | 1.23789213             |
| ADAMTSL5        | 7.255732039         | 6.033847598                      | 5.07E-10    | 7.255732039         | 6.23908                     | 0.000935168 | ECM_REGULATORS     | 1.202505022                | 1.162949031            |
| AGT             | 9.451233981         | 8.416494983                      | 0.004526609 | 9.451233981         | 7.08583                     | 6.47E-06    | ECM_REGULATORS     | 1.122941795                | 1.333821723            |
| AMELX           | 2.64708835          | 0.194335534                      | 6.29E-252   | 2.64708835          | 0.11755                     | 2.29E-05    | ECM_GLYCOPROTEINS  | 13.62122665                | 22.518829              |
| ANXA3           | 11.47964563         | 8.926245599                      | 1.13E-21    | 11.47964563         | 10.30756                    | 4.52E-06    | ECM_AFFILIATED     | 1.286055319                | 1.11371126             |
| ANXA4           | 13.23804854         | 11.82699493                      | 2.91E-25    | 13.23804854         | 12.90817                    | 0.033980463 | ECM_AFFILIATED     | 1.119307873                | 1.025555795            |
| AREG            | 11.25790291         | 6.670819537                      | 6.37E-48    | 11.25790291         | 10.0434                     | 0.026168835 | SECRETED_FACTORS   | 1.687634158                | 1.120925475            |
| BMP4            | 10.89172427         | 7.75824932                       | 9.47E-62    | 10.89172427         | 9.50031                     | 0.002082775 | SECRETED_FACTORS   | 1.403889437                | 1.146459881            |
| BMP7            | 9.837092233         | 7.932301201                      | 5.28E-07    | 9.837092233         | 8.0239                      | 0.002984458 | SECRETED_FACTORS   | 1.240130951                | 1.225973932            |
| CCL20           | 10.43490388         | 5.551004688                      | 4.54E-52    | 10.43490388         | 8.93931                     | 0.00264275  | SECRETED_FACTORS   | 1.879822567                | 1.167305294            |
| CCL24           | 8.813801942         | 2.305375744                      | 3.47E-210   | 8.813801942         | 7.60971                     | 0.027168822 | SECRETED_FACTORS   | 3.823152024                | 1.158230989            |
| COL10A1         | 7.721826214         | 6.694443984                      | 0.005019957 | 7.721826214         | 2.16437                     | 9.59E-07    | COLLAGENS          | 1.153467896                | 3.567701555            |
| COL11A1         | 8.975939806         | 7.317275999                      | 1.52E-05    | 8.975939806         | 4.44583                     | 1.60E-07    | COLLAGENS          | 1.22667777                 | 2.018957046            |
| COL12A1         | 12.51784175         | 11.1207018                       | 5.55E-08    | 12.51784175         | 11.27396                    | 0.006744425 | COLLAGENS          | 1.125634153                | 1.110332283            |
| COL1A1          | 15.60103883         | 14.56758602                      | 0.000803474 | 15.60103883         | 13.49192                    | 0.000170636 | COLLAGENS          | 1.07094194                 | 1.156324588            |
| COL1A2          | 15.23048738         | 14.3745589                       | 0.001435371 | 15.23048738         | 14.13734                    | 0.024545588 | COLLAGENS          | 1.059544678                | 1.077323413            |
| COL4A1          | 13.68104563         | 13.10463265                      | 0.002643182 | 13.68104563         | 12.41511                    | 0.000737651 | COLLAGENS          | 1.043985436                | 1.101967331            |
| COL4A1          | 13.68104563         | 13.10463265                      | 0.002643182 | 13.68104563         | 12.41511                    | 0.000737651 | BASEMENT_MEMBRANES | 1.043985436                | 1.101967331            |
| COL5A1          | 12.7487699          | 11.66527755                      | 9.19E-06    | 12.7487699          | 11.41928                    | 0.002752162 | COLLAGENS          | 1.092881832                | 1.11642502             |
| COL5A2          | 12.24646117         | 11.39125581                      | 0.000123375 | 12.24646117         | 10.88569                    | 0.001757219 | COLLAGENS          | 1.075075599                | 1.125005504            |
| COL9A3          | 8.705231068         | 6.830510682                      | 9.21E-14    | 8.705231068         | 6.76355                     | 0.00176223  | COLLAGENS          | 1.274462697                | 1.287080168            |
| CSF2            | 3.044507767         | 1.948265976                      | 4.79E-07    | 3.044507767         | 1.07041                     | 0.000920983 | SECRETED_FACTORS   | 1.562675633                | 2.844244511            |
| CSF3            | 4.945138835         | 2.809586086                      | 3.72E-14    | 4.945138835         | 3.2849                      | 0.026547626 | SECRETED_FACTORS   | 1.760095147                | 1.505415335            |
| CST1            | 8.289738835         | 4.675118846                      | 2.47E-20    | 8.289738835         | 2.1563                      | 1.70E-08    | ECM_REGULATORS     | 1.773161091                | 3.844427415            |
| CST2            | 4.538435922         | 3.474976626                      | 0.000155135 | 4.538435922         | 1.00058                     | 9.63E-07    | ECM_REGULATORS     | 1.306033511                | 4.535805155            |
| CST4            | 2.991103883         | 2.050409364                      | 0.000179375 | 2.991103883         | 0.37357                     | 0.000220894 | ECM_REGULATORS     | 1.458783761                | 8.006809657            |
| CSTL1           | 1.114260194         | 0.510782866                      | 4.90E-11    | 1.114260194         | 0                           | 0.001501164 | ECM_REGULATORS     | 2.181475279                | Inf                    |
| CTSV            | 9.022127184         | 7.231072045                      | 9.79E-12    | 9.022127184         | 7.6191                      | 0.00094036  | ECM_REGULATORS     | 1.247688742                | 1.184146052            |
| CXCL1           | 10.30440291         | 6.556732015                      | 1.62E-32    | 10.30440291         | 8.08621                     | 6.20E-05    | SECRETED_FACTORS   | 1.571576036                | 1.274317995            |
| CXCL11          | 7.212341748         | 6.342739488                      | 0.001063379 | 7.212341748         | 4.78896                     | 8.75E-05    | SECRETED_FACTORS   | 1.137101999                | 1.506035078            |
| CXCL2           | 8.884470874         | 6.828612117                      | 3.19E-16    | 8.884470874         | 7.1593                      | 0.000476769 | SECRETED_FACTORS   | 1.301065388                | 1.240969211            |
| CXCL3           | 9.6049              | 4.889910098                      | 6.54E-94    | 9.6049              | 7.42962                     | 1.45E-05    | SECRETED_FACTORS   | 1.964228341                | 1.292784826            |
| CXCL5           | 7.498083495         | 4.732781069                      | 2.21E-18    | 7.498083495         | 4.50304                     | 0.003513402 | SECRETED_FACTORS   | 1.584286994                | 1.665115898            |
| CXCL6           | 5.950331068         | 4.336360895                      | 6.17E-07    | 5.950331068         | 4.65486                     | 0.049647524 | SECRETED_FACTORS   | 1.372194615                | 1.278305055            |
| CXCL8           | 9.977666019         | 7.779989041                      | 1.05E-15    | 9.977666019         | 7.32096                     | 0.000264803 | SECRETED_FACTORS   | 1.282478159                | 1.362890389            |
| EPYC            | 3.355069903         | 2.536326265                      | 0.003234883 | 3.355069903         | 0.37402                     | 0.001558463 | PROTEOGLYCANS      | 1.322806908                | 8.970295447            |
| F12             | 8.619692233         | 7.100190636                      | 1.05E-09    | 8.619692233         | 7.77414                     | 0.024367298 | ECM_REGULATORS     | 1.214008563                | 1.108764729            |
| F2              | 3.100887379         | 2.08297719                       | 0.003869562 | 3.100887379         | 0.84363                     | 0.005895919 | ECM_REGULATORS     | 1.48868043                 | 3.675648541            |
| F7              | 4.950301942         | 3.873236448                      | 0.000364096 | 4.950301942         | 2.71598                     | 0.00172469  | ECM_REGULATORS     | 1.278078942                | 1.82265773             |

|                 |             |             |             |             |          |             |                    |             |             |
|-----------------|-------------|-------------|-------------|-------------|----------|-------------|--------------------|-------------|-------------|
| <b>FGF18</b>    | 5.941838835 | 4.782199904 | 4.22E-07    | 5.941838835 | 3.92801  | 7.18E-06    | SECRETED_FACTORS   | 1.242490685 | 1.512684243 |
| <b>FGF19</b>    | 4.928401942 | 1.643065402 | 4.15E-38    | 4.928401942 | 0.7498   | 1.63E-05    | SECRETED_FACTORS   | 2.999516596 | 6.572955377 |
| <b>FGF20</b>    | 2.666450485 | 1.844686926 | 6.89E-06    | 2.666450485 | 0.66708  | 0.029385049 | SECRETED_FACTORS   | 1.445475895 | 3.997197466 |
| <b>FGF23</b>    | 1.0403      | 0.469638924 | 9.46E-08    | 1.0403      | 0.07043  | 0.048989808 | SECRETED_FACTORS   | 2.215106002 | 14.77069431 |
| <b>FGF4</b>     | 1.201363107 | 0.406171312 | 4.61E-08    | 1.201363107 | 0.24826  | 0.011443495 | SECRETED_FACTORS   | 2.957774398 | 4.839132791 |
| <b>LAMC2</b>    | 12.39525922 | 9.831347513 | 6.97E-11    | 12.39525922 | 11.55936 | 0.005519794 | ECM_GLYCOPROTEINS  | 1.26078945  | 1.072313625 |
| <b>LAMC2</b>    | 12.39525922 | 9.831347513 | 6.97E-11    | 12.39525922 | 11.55936 | 0.005519794 | BASEMENT_MEMBRANES | 1.26078945  | 1.072313625 |
| <b>LOXL2</b>    | 10.8055301  | 10.07428463 | 3.11E-05    | 10.8055301  | 9.27297  | 6.24E-05    | ECM_REGULATORS     | 1.072585349 | 1.165271763 |
| <b>MMP1</b>     | 9.842854369 | 6.627750723 | 3.27E-16    | 9.842854369 | 6.36902  | 8.99E-05    | ECM_REGULATORS     | 1.48509725  | 1.545426827 |
| <b>MMP10</b>    | 5.890628155 | 4.533528019 | 0.000210496 | 5.890628155 | 3.1467   | 0.000606095 | ECM_REGULATORS     | 1.299347469 | 1.872001829 |
| <b>MMP11</b>    | 11.32738252 | 9.858270961 | 2.86E-07    | 11.32738252 | 7.73634  | 2.58E-08    | ECM_REGULATORS     | 1.149023249 | 1.464178478 |
| <b>MMP20</b>    | 1.184235922 | 0.592134173 | 3.78E-07    | 1.184235922 | 0.19067  | 0.018847858 | ECM_REGULATORS     | 1.999945243 | 6.210918982 |
| <b>MMP3</b>     | 9.020161165 | 4.142292602 | 6.47E-40    | 9.020161165 | 4.97275  | 2.72E-05    | ECM_REGULATORS     | 2.177577016 | 1.813918087 |
| <b>MMP7</b>     | 9.135129126 | 8.135262776 | 0.01469889  | 9.135129126 | 3.79349  | 1.09E-08    | ECM_REGULATORS     | 1.122905231 | 2.408106816 |
| <b>MMP8</b>     | 2.446820388 | 1.926423533 | 0.021713963 | 2.446820388 | 0.32454  | 0.000617017 | ECM_REGULATORS     | 1.270136264 | 7.539349197 |
| <b>MMP9</b>     | 10.14470097 | 9.293933642 | 0.003084157 | 10.14470097 | 9.02294  | 0.038340081 | ECM_REGULATORS     | 1.091540069 | 1.124323222 |
| <b>OVGP1</b>    | 7.375123301 | 6.287084938 | 8.34E-11    | 7.375123301 | 6.13266  | 0.000145768 | ECM_AFFILIATED     | 1.173059275 | 1.20259778  |
| <b>PLOD3</b>    | 12.61662621 | 11.61495715 | 3.72E-22    | 12.61662621 | 11.3423  | 8.06E-08    | ECM_REGULATORS     | 1.086239583 | 1.112351658 |
| <b>PODNL1</b>   | 7.089570874 | 6.538444441 | 0.013002392 | 7.089570874 | 5.7042   | 0.000324086 | PROTEOGLYCANS      | 1.084290145 | 1.242868566 |
| <b>PRSS2</b>    | 4.21358835  | 2.974642102 | 0.000368052 | 4.21358835  | 1.02447  | 0.003754459 | ECM_REGULATORS     | 1.416502626 | 4.112944595 |
| <b>REG1A</b>    | 8.111842718 | 2.150232005 | 1.82E-63    | 8.111842718 | 2.76355  | 0.000375585 | ECM_AFFILIATED     | 3.77254301  | 2.935297975 |
| <b>REG1B</b>    | 5.031982524 | 0.604387787 | 1.16E-111   | 5.031982524 | 1.36788  | 0.005630639 | ECM_AFFILIATED     | 8.3257515   | 3.678672489 |
| <b>REG3A</b>    | 6.186950485 | 0.691989679 | 1.39E-119   | 6.186950485 | 1.66069  | 0.001777828 | ECM_AFFILIATED     | 8.940813242 | 3.725530042 |
| <b>SDC4</b>     | 13.36613495 | 12.80251828 | 0.001357438 | 13.36613495 | 12.6837  | 0.003653586 | ECM_AFFILIATED     | 1.044023891 | 1.053804091 |
| <b>SERPINA4</b> | 3.886332039 | 2.266563977 | 3.19E-06    | 3.886332039 | 0.25052  | 1.30E-05    | ECM_REGULATORS     | 1.714635932 | 15.51306099 |
| <b>SERPINB5</b> | 9.847217476 | 5.535738191 | 5.12E-19    | 9.847217476 | 8.4504   | 0.026939751 | ECM_REGULATORS     | 1.778844507 | 1.165296019 |
| <b>SERPINE2</b> | 11.52373301 | 10.74347755 | 0.001017733 | 11.52373301 | 10.41633 | 0.003728025 | ECM_REGULATORS     | 1.072625968 | 1.106314125 |
| <b>SFTA2</b>    | 4.850459223 | 2.87030541  | 1.75E-08    | 4.850459223 | 0.84392  | 9.01E-07    | ECM_AFFILIATED     | 1.689875651 | 5.747534391 |
| <b>SPON2</b>    | 10.77283689 | 10.24663644 | 0.024005815 | 10.77283689 | 9.83802  | 0.004386635 | ECM_GLYCOPROTEINS  | 1.051353482 | 1.095020837 |
| <b>SRPX2</b>    | 9.234133981 | 7.587607153 | 8.55E-13    | 9.234133981 | 6.94982  | 1.97E-05    | ECM_GLYCOPROTEINS  | 1.217002119 | 1.328686783 |
| <b>SULF2</b>    | 12.57878058 | 11.71216418 | 1.99E-07    | 12.57878058 | 11.95181 | 0.021577686 | ECM_REGULATORS     | 1.07399285  | 1.052458212 |
| <b>TGFBI</b>    | 14.52063592 | 12.17238885 | 5.21E-32    | 14.52063592 | 11.6497  | 2.44E-09    | ECM_GLYCOPROTEINS  | 1.192915877 | 1.246438614 |
| <b>TSPEAR</b>   | 4.275168932 | 2.483923895 | 3.45E-18    | 4.275168932 | 2.73338  | 0.018454626 | ECM_GLYCOPROTEINS  | 1.721135233 | 1.564059491 |
| <b>WNT11</b>    | 8.472060194 | 5.899689413 | 1.01E-27    | 8.472060194 | 7.02067  | 0.024158487 | SECRETED_FACTORS   | 1.436018    | 1.206731009 |
| <b>WNT2</b>     | 7.47143301  | 5.44718666  | 1.39E-11    | 7.47143301  | 2.96796  | 5.57E-10    | SECRETED_FACTORS   | 1.371613179 | 2.517363108 |
| <b>VWA2</b>     | 8.569839806 | 5.360233535 | 1.40E-26    | 8.569839806 | 4.93176  | 4.92E-09    | ECM_GLYCOPROTEINS  | 1.598781051 | 1.737683871 |
| <b>ZP3</b>      | 8.856968932 | 7.783635916 | 1.93E-13    | 8.856968932 | 7.40735  | 1.90E-05    | ECM_GLYCOPROTEINS  | 1.137896097 | 1.195700073 |

## Sarcoma (SARC)

| Signature genes | Expression in tumor | Expression in rest of Pan-Cancer | P-value   | Expression in tumor | Expression in normal tissue | P-value     | Matrisome category | Fold change vs. Pan-Cancer | Fold change vs. normal |
|-----------------|---------------------|----------------------------------|-----------|---------------------|-----------------------------|-------------|--------------------|----------------------------|------------------------|
| ADAM12          | 10.89949015         | 8.386105051                      | 3.56E-56  | 10.89949015         | 7.22335                     | 0.032551242 | ECM_REGULATORS     | 1.299708278                | 1.50892455             |
| ADAMTS6         | 7.747486742         | 5.717910971                      | 3.51E-76  | 7.747486742         | 5.252                       | 0.030436854 | ECM_REGULATORS     | 1.354950572                | 1.475149799            |
| ADAMTS7         | 10.10905682         | 7.996091801                      | 2.51E-111 | 10.10905682         | 7.2841                      | 0.004434144 | ECM_REGULATORS     | 1.26424972                 | 1.387825101            |
| AMH             | 6.441102652         | 4.809554736                      | 2.85E-27  | 6.441102652         | 2.6229                      | 0.019732308 | SECRETED_FACTORS   | 1.339230554                | 2.455717965            |
| ANXA5           | 14.19035417         | 13.35678082                      | 1.95E-38  | 14.19035417         | 13.12465                    | 0.033891719 | ECM_AFFILIATED     | 1.062408252                | 1.081198673            |
| BGLAP           | 4.464993561         | 4.085882626                      | 2.50E-05  | 4.464993561         | 2.1235                      | 0.028093098 | ECM_GLYCOPROTEINS  | 1.092785567                | 2.102657669            |
| BMP1            | 12.16980303         | 10.58460187                      | 4.13E-122 | 12.16980303         | 10.2758                     | 0.019172888 | ECM_REGULATORS     | 1.149764835                | 1.184316844            |
| COL1A1          | 18.04303598         | 14.62013411                      | 1.35E-73  | 18.04303598         | 14.808                      | 0.037129863 | COLLAGENS          | 1.234122468                | 1.218465423            |
| COL1A2          | 17.71674394         | 14.38451312                      | 1.04E-92  | 17.71674394         | 15.02                       | 0.04974141  | COLLAGENS          | 1.231654057                | 1.179543538            |
| COL5A1          | 14.92131023         | 11.71228787                      | 4.24E-102 | 14.92131023         | 11.7459                     | 0.017398671 | COLLAGENS          | 1.273987661                | 1.270342011            |
| COL5A2          | 14.23705114         | 11.41711507                      | 2.59E-95  | 14.23705114         | 11.2083                     | 0.004779968 | COLLAGENS          | 1.246991999                | 1.270223953            |
| COL5A3          | 11.24105492         | 9.395735251                      | 3.29E-58  | 11.24105492         | 8.33285                     | 0.041100551 | COLLAGENS          | 1.196399709                | 1.349004833            |
| COL6A1          | 16.40835038         | 13.11534005                      | 8.46E-218 | 16.40835038         | 14.443                      | 0.015269077 | COLLAGENS          | 1.25108082                 | 1.136076326            |
| COL6A1          | 16.40835038         | 13.11534005                      | 8.46E-218 | 16.40835038         | 14.443                      | 0.015269077 | BASEMENT_MEMBRANES | 1.25108082                 | 1.136076326            |
| COL6A2          | 16.65895303         | 13.17268439                      | 4.64E-172 | 16.65895303         | 14.4729                     | 0.008329954 | COLLAGENS          | 1.264658936                | 1.151044575            |
| COL6A2          | 16.65895303         | 13.17268439                      | 4.64E-172 | 16.65895303         | 14.4729                     | 0.008329954 | BASEMENT_MEMBRANES | 1.264658936                | 1.151044575            |
| COL6A3          | 15.57116515         | 12.53777336                      | 4.14E-72  | 15.57116515         | 13.26485                    | 0.044087104 | BASEMENT_MEMBRANES | 1.241940231                | 1.173866659            |
| COL6A3          | 15.57116515         | 12.53777336                      | 4.14E-72  | 15.57116515         | 13.26485                    | 0.044087104 | COLLAGENS          | 1.241940231                | 1.173866659            |
| CTHRC1          | 10.79435            | 9.016966032                      | 2.63E-29  | 10.79435            | 7.6714                      | 0.047271785 | ECM_GLYCOPROTEINS  | 1.197115522                | 1.407089971            |
| FBLN7           | 9.52141553          | 7.237631285                      | 1.00E-98  | 9.52141553          | 6.77405                     | 0.023423373 | ECM_GLYCOPROTEINS  | 1.315543049                | 1.405572077            |
| FBN1            | 13.91629318         | 11.06802929                      | 4.49E-134 | 13.91629318         | 11.3717                     | 0.042504217 | ECM_GLYCOPROTEINS  | 1.257341557                | 1.223765416            |
| FBN2            | 10.41097576         | 7.095961652                      | 3.40E-95  | 10.41097576         | 6.4834                      | 0.022199914 | ECM_GLYCOPROTEINS  | 1.467169112                | 1.605789517            |
| FN1             | 17.24498068         | 15.10008369                      | 1.02E-48  | 17.24498068         | 14.47775                    | 0.013909119 | ECM_GLYCOPROTEINS  | 1.142045371                | 1.191136791            |
| GPC2            | 6.51081553          | 5.548603374                      | 2.53E-13  | 6.51081553          | 3.4904                      | 0.006192393 | ECM_AFFILIATED     | 1.173415199                | 1.865349396            |
| HAPLN3          | 9.578815152         | 8.507890854                      | 5.42E-22  | 9.578815152         | 7.12765                     | 0.02616298  | PROTEOGLYCANS      | 1.12587424                 | 1.343895274            |
| LAMA4           | 13.19065265         | 10.84677364                      | 5.35E-108 | 13.19065265         | 11.42485                    | 0.048149884 | ECM_GLYCOPROTEINS  | 1.216089972                | 1.15455806             |
| LAMA4           | 13.19065265         | 10.84677364                      | 5.35E-108 | 13.19065265         | 11.42485                    | 0.048149884 | BASEMENT_MEMBRANES | 1.216089972                | 1.15455806             |
| LAMC1           | 14.19221288         | 12.75481789                      | 9.61E-69  | 14.19221288         | 12.84435                    | 0.047868988 | ECM_GLYCOPROTEINS  | 1.112694278                | 1.104938193            |
| LAMC1           | 14.19221288         | 12.75481789                      | 9.61E-69  | 14.19221288         | 12.84435                    | 0.047868988 | BASEMENT_MEMBRANES | 1.112694278                | 1.104938193            |
| LGALS1          | 14.94000682         | 12.62419549                      | 1.07E-157 | 14.94000682         | 13.10245                    | 0.015439831 | ECM_AFFILIATED     | 1.18344229                 | 1.140245284            |
| LOXL2           | 12.28161061         | 10.10354265                      | 4.11E-91  | 12.28161061         | 9.8336                      | 0.028835334 | ECM_REGULATORS     | 1.215574678                | 1.24894348             |
| MFAP2           | 11.8167822          | 9.030276431                      | 8.70E-62  | 11.8167822          | 9.1491                      | 0.044804588 | ECM_GLYCOPROTEINS  | 1.308573695                | 1.291578647            |
| MMP14           | 15.24377083         | 12.86918534                      | 3.17E-110 | 15.24377083         | 12.4847                     | 0.002533468 | ECM_REGULATORS     | 1.184517157                | 1.220996166            |
| NTN3            | 2.861985985         | 2.082597484                      | 3.01E-14  | 2.861985985         | 0                           | 0.024550644 | BASEMENT_MEMBRANES | 1.374238664                | Inf                    |
| NTN3            | 2.861985985         | 2.082597484                      | 3.01E-14  | 2.861985985         | 0                           | 0.024550644 | ECM_GLYCOPROTEINS  | 1.374238664                | Inf                    |
| PLOD3           | 12.31404697         | 11.6684407                       | 8.07E-23  | 12.31404697         | 11.1919                     | 0.040302748 | ECM_REGULATORS     | 1.055329267                | 1.100264206            |
| PLXNA1          | 11.93235492         | 11.50490271                      | 7.92E-08  | 11.93235492         | 9.99535                     | 0.003418437 | ECM_AFFILIATED     | 1.037153918                | 1.193790605            |
| PLXND1          | 12.96534848         | 11.83478347                      | 5.30E-57  | 12.96534848         | 11.57105                    | 0.023035923 | ECM_AFFILIATED     | 1.095528998                | 1.120498873            |
| PXDN            | 13.25719356         | 11.20015499                      | 3.20E-75  | 13.25719356         | 11.33015                    | 0.029560636 | ECM_GLYCOPROTEINS  | 1.183661616                | 1.170081028            |
| SERPINH1        | 14.63516136         | 12.62998523                      | 1.80E-124 | 14.63516136         | 12.57145                    | 0.00503397  | ECM_REGULATORS     | 1.158763142                | 1.164158579            |
| TIMP2           | 15.46104886         | 13.25271185                      | 9.76E-151 | 15.46104886         | 14.0228                     | 0.023940154 | ECM_REGULATORS     | 1.16663284                 | 1.102565027            |
| VCAN            | 13.49171932         | 11.61817348                      | 1.13E-37  | 13.49171932         | 10.5325                     | 0.027976219 | PROTEOGLYCANS      | 1.16125993                 | 1.280960771            |

**Stomach Adenocarcinoma (STAD)**

| Signature genes | Expression in tumor | Expression in rest of Pan-Cancer | P-value     | Expression in tumor | Expression in normal tissue | P-value     | Matrisome category | Fold change vs. Pan-Cancer | Fold change vs. normal |
|-----------------|---------------------|----------------------------------|-------------|---------------------|-----------------------------|-------------|--------------------|----------------------------|------------------------|
| ACAN            | 8.278879556         | 6.323319026                      | 8.86E-64    | 8.278879556         | 4.600433333                 | 9.35E-27    | PROTEOGLYCANS      | 1.309261722                | 1.799586899            |
| ADAM10          | 12.388144           | 12.04475783                      | 5.17E-22    | 12.388144           | 11.46264444                 | 5.49E-14    | ECM_REGULATORS     | 1.02850918                 | 1.080740492            |
| ADAM12          | 8.847993556         | 8.421758121                      | 0.000639662 | 8.847993556         | 5.682261111                 | 2.50E-21    | ECM_REGULATORS     | 1.050611218                | 1.557125479            |
| ADAM30          | 0.736926889         | 0.122202466                      | 7.03E-121   | 0.736926889         | 0.242536111                 | 0.040059193 | ECM_REGULATORS     | 6.03037658                 | 3.038421312            |
| ADAM8           | 10.00042489         | 8.821557749                      | 8.80E-43    | 10.00042489         | 8.363797222                 | 4.78E-12    | ECM_REGULATORS     | 1.133634804                | 1.195679979            |
| ADAM9           | 13.004724           | 11.71561116                      | 2.79E-96    | 13.004724           | 12.33549167                 | 7.09E-05    | ECM_REGULATORS     | 1.110033768                | 1.054252587            |
| ADAMDEC1        | 8.29156             | 5.850329943                      | 3.60E-79    | 8.29156             | 5.992755556                 | 3.81E-10    | ECM_REGULATORS     | 1.417280748                | 1.383597232            |
| ADAMTS12        | 9.685602222         | 7.868232738                      | 3.47E-58    | 9.685602222         | 6.703233333                 | 2.55E-23    | ECM_REGULATORS     | 1.230975563                | 1.444914975            |
| ADAMTS14        | 8.340000444         | 6.534747141                      | 3.46E-71    | 8.340000444         | 6.090702778                 | 1.21E-20    | ECM_REGULATORS     | 1.2762545                  | 1.369300186            |
| ADAMTS18        | 4.399408889         | 3.841406452                      | 7.46E-07    | 4.399408889         | 1.812333333                 | 5.52E-14    | ECM_REGULATORS     | 1.145259931                | 2.427483293            |
| ADAMTS2         | 10.93916133         | 9.391779411                      | 2.39E-54    | 10.93916133         | 8.483675                    | 4.98E-19    | ECM_REGULATORS     | 1.164759185                | 1.289436634            |
| ADAMTS4         | 10.26293044         | 9.106498629                      | 2.26E-36    | 10.26293044         | 9.804319444                 | 0.030943719 | ECM_REGULATORS     | 1.126989731                | 1.046776424            |
| ADAMTS6         | 6.972587333         | 5.681847736                      | 8.00E-51    | 6.972587333         | 5.693872222                 | 4.09E-08    | ECM_REGULATORS     | 1.227168988                | 1.224577416            |
| ADAMTS7         | 9.007179778         | 8.00658547                       | 6.33E-41    | 9.007179778         | 7.857366667                 | 2.44E-09    | ECM_REGULATORS     | 1.124971414                | 1.146335682            |
| ADAMTS9         | 9.756672667         | 8.971298469                      | 7.25E-19    | 9.756672667         | 8.892827778                 | 1.82E-05    | ECM_REGULATORS     | 1.087542979                | 1.097139505            |
| ADAMTSL2        | 8.415504            | 8.196535852                      | 0.009711787 | 8.415504            | 7.401125                    | 3.46E-06    | ECM_REGULATORS     | 1.026714718                | 1.137057407            |
| AEBP1           | 13.21165            | 12.81990476                      | 4.19E-05    | 13.21165            | 12.73315833                 | 0.046740666 | ECM_GLYCOPROTEINS  | 1.030557578                | 1.037578396            |
| AGRN            | 13.67810778         | 13.28611182                      | 4.52E-10    | 13.67810778         | 12.150275                   | 2.95E-16    | BASEMENT_MEMBRANES | 1.029504189                | 1.125744708            |
| AGRN            | 13.67810778         | 13.28611182                      | 4.52E-10    | 13.67810778         | 12.150275                   | 2.95E-16    | ECM_GLYCOPROTEINS  | 1.029504189                | 1.125744708            |
| AGT             | 10.06237956         | 8.416494983                      | 7.73E-21    | 10.06237956         | 8.559566667                 | 1.57E-05    | ECM_REGULATORS     | 1.195554631                | 1.175571141            |
| AMELX           | 1.047598889         | 0.194335534                      | 6.80E-124   | 1.047598889         | 0.123505556                 | 0.000113839 | ECM_GLYCOPROTEINS  | 5.390670813                | 8.482200531            |
| AMH             | 5.983361333         | 4.78537348                       | 1.11E-24    | 5.983361333         | 3.845486111                 | 4.06E-08    | SECRETED_FACTORS   | 1.250343648                | 1.555944076            |
| ANGPT2          | 8.988419333         | 8.572867687                      | 7.50E-08    | 8.988419333         | 7.270194444                 | 2.98E-16    | SECRETED_FACTORS   | 1.048472887                | 1.23633823             |
| ANXA13          | 8.118077111         | 3.513948788                      | 6.63E-201   | 8.118077111         | 6.114466667                 | 0.000117569 | ECM_AFFILIATED     | 2.310243433                | 1.327683599            |
| ANXA2           | 15.21144378         | 14.42235591                      | 2.45E-26    | 15.21144378         | 14.64078889                 | 0.000602821 | ECM_AFFILIATED     | 1.054712827                | 1.038977059            |
| ANXA4           | 13.40527578         | 11.82699493                      | 3.37E-124   | 13.40527578         | 12.352425                   | 9.78E-09    | ECM_AFFILIATED     | 1.133447326                | 1.085234339            |
| ANXA9           | 7.681538667         | 7.394649341                      | 0.004400053 | 7.681538667         | 6.813055556                 | 0.001951112 | ECM_AFFILIATED     | 1.03879688                 | 1.127473364            |
| ASPN            | 10.49579844         | 8.261593676                      | 1.41E-75    | 10.49579844         | 9.095838889                 | 1.20E-05    | PROTEOGLYCANS      | 1.270432662                | 1.153912088            |
| ASTL            | 2.499896667         | 1.883944398                      | 1.82E-16    | 2.499896667         | 1.901575                    | 0.022822351 | ECM_REGULATORS     | 1.32694822                 | 1.314645316            |
| BDNF            | 5.546703111         | 5.227870663                      | 0.001870225 | 5.546703111         | 5.011527778                 | 0.019961389 | SECRETED_FACTORS   | 1.060987057                | 1.106788859            |
| BGN             | 13.84422956         | 13.22871855                      | 2.06E-10    | 13.84422956         | 11.46079167                 | 8.30E-20    | PROTEOGLYCANS      | 1.046528392                | 1.207964507            |
| BMP1            | 10.882524           | 10.62402635                      | 1.59E-06    | 10.882524           | 9.590019444                 | 2.81E-18    | ECM_REGULATORS     | 1.02433142                 | 1.13477601             |
| BMP8A           | 7.135248222         | 4.035349936                      | 5.70E-269   | 7.135248222         | 5.140386111                 | 1.31E-14    | SECRETED_FACTORS   | 1.768185742                | 1.388076317            |
| BMP8B           | 8.574716222         | 7.691986097                      | 2.31E-26    | 8.574716222         | 8.096230556                 | 0.02546795  | SECRETED_FACTORS   | 1.114759714                | 1.059099807            |
| C1QB            | 12.45423289         | 11.63344026                      | 4.62E-20    | 12.45423289         | 11.96248889                 | 0.043090101 | ECM_AFFILIATED     | 1.070554591                | 1.041107165            |
| C1QC            | 12.16901911         | 11.46874185                      | 5.16E-16    | 12.16901911         | 11.65993333                 | 0.029118777 | ECM_AFFILIATED     | 1.061059641                | 1.043661123            |
| C1QTNF5         | 9.951939556         | 9.320140306                      | 2.89E-15    | 9.951939556         | 9.348008333                 | 0.00247881  | ECM_AFFILIATED     | 1.067788599                | 1.064605336            |
| C1QTNF8         | 0.637034            | 0.303833429                      | 1.83E-16    | 0.637034            | 0.184544444                 | 0.013611429 | ECM_AFFILIATED     | 2.096655401                | 3.451927268            |
| CCL15           | 7.275021778         | 2.223574734                      | 1.49E-244   | 7.275021778         | 4.281536111                 | 2.07E-10    | SECRETED_FACTORS   | 3.271768502                | 1.699161607            |
| CCL18           | 9.123665556         | 6.923515264                      | 1.12E-41    | 9.123665556         | 7.521652778                 | 3.98E-05    | SECRETED_FACTORS   | 1.317779366                | 1.212986803            |
| CCL20           | 9.637511111         | 5.551004688                      | 5.41E-148   | 9.637511111         | 7.533080556                 | 3.32E-06    | SECRETED_FACTORS   | 1.736174198                | 1.279358563            |
| CCL22           | 7.707134889         | 5.887581409                      | 2.34E-56    | 7.707134889         | 6.867469444                 | 0.003011668 | SECRETED_FACTORS   | 1.309049396                | 1.122267081            |

|         |             |             |             |             |             |             |                    |             |             |
|---------|-------------|-------------|-------------|-------------|-------------|-------------|--------------------|-------------|-------------|
| CCL26   | 4.449234889 | 3.004064052 | 7.58E-53    | 4.449234889 | 3.557566667 | 0.0055161   | SECRETED_FACTORS   | 1.481071912 | 1.250639919 |
| CCL3L3  | 5.978905556 | 5.520878763 | 8.70E-07    | 5.978905556 | 4.094302778 | 2.60E-08    | SECRETED_FACTORS   | 1.082962661 | 1.46029883  |
| CCL4    | 8.670872889 | 7.670621992 | 7.83E-34    | 8.670872889 | 7.705441667 | 0.000166742 | SECRETED_FACTORS   | 1.130400233 | 1.125292133 |
| CCL4L2  | 7.397370889 | 6.472151775 | 1.37E-22    | 7.397370889 | 5.884366667 | 4.55E-06    | SECRETED_FACTORS   | 1.142953865 | 1.257122696 |
| CCL7    | 2.993413111 | 2.256527657 | 2.15E-13    | 2.993413111 | 0.602138889 | 2.98E-11    | SECRETED_FACTORS   | 1.326557244 | 4.971300088 |
| CLCF1   | 8.466583333 | 7.683445344 | 3.46E-19    | 8.466583333 | 7.924052778 | 0.004851927 | SECRETED_FACTORS   | 1.101925367 | 1.068466298 |
| CLEC12A | 5.365190889 | 5.125828423 | 0.021386655 | 5.365190889 | 4.759672222 | 0.021714527 | ECM_AFFILIATED     | 1.046697323 | 1.127218564 |
| CLEC19A | 0.755869333 | 0.215233557 | 3.02E-83    | 0.755869333 | 0.34615     | 0.0234625   | ECM_AFFILIATED     | 3.511856355 | 2.183646781 |
| CLEC4A  | 6.372682    | 6.157361533 | 0.000444025 | 6.372682    | 5.747713889 | 0.001288989 | ECM_AFFILIATED     | 1.0349696   | 1.108733337 |
| CLEC4C  | 1.358348    | 1.146013977 | 0.001811117 | 1.358348    | 0.820880556 | 0.024102345 | ECM_AFFILIATED     | 1.185280482 | 1.654745006 |
| CLEC4E  | 6.200654667 | 5.399081813 | 9.80E-18    | 6.200654667 | 5.540661111 | 0.021048406 | ECM_AFFILIATED     | 1.148464661 | 1.119118196 |
| CLEC6A  | 2.161366889 | 1.388828189 | 6.59E-25    | 2.161366889 | 1.268141667 | 0.001362805 | ECM_AFFILIATED     | 1.556252175 | 1.704357601 |
| CLEC7A  | 8.015342222 | 7.78728395  | 0.007319763 | 8.015342222 | 7.28485     | 0.000402668 | ECM_AFFILIATED     | 1.029285984 | 1.100275534 |
| CNTF    | 4.351806889 | 4.014342028 | 1.95E-07    | 4.351806889 | 3.767913889 | 0.00138598  | SECRETED_FACTORS   | 1.0840648   | 1.154964529 |
| COCH    | 7.461280222 | 6.377181409 | 6.96E-19    | 7.461280222 | 6.107552778 | 0.000284567 | ECM_GLYCOPROTEINS  | 1.169996546 | 1.221648096 |
| COL10A1 | 8.806952222 | 6.694443984 | 1.68E-32    | 8.806952222 | 2.843163889 | 1.56E-26    | COLLAGENS          | 1.315561418 | 3.097588661 |
| COL11A1 | 7.916312889 | 7.317275999 | 0.001265841 | 7.916312889 | 2.879758333 | 1.71E-19    | COLLAGENS          | 1.081866106 | 2.748950423 |
| COL12A1 | 13.06926    | 11.1207018  | 2.63E-55    | 13.06926    | 11.40725278 | 4.92E-11    | COLLAGENS          | 1.175218996 | 1.145697413 |
| COL15A1 | 12.49456422 | 10.32914512 | 5.53E-91    | 12.49456422 | 11.86424722 | 0.003117688 | COLLAGENS          | 1.209641657 | 1.053127433 |
| COL15A1 | 12.49456422 | 10.32914512 | 5.53E-91    | 12.49456422 | 11.86424722 | 0.003117688 | BASEMENT_MEMBRANES | 1.209641657 | 1.053127433 |
| COL1A1  | 16.64813133 | 14.56758602 | 2.66E-44    | 16.64813133 | 13.83975278 | 2.43E-20    | COLLAGENS          | 1.142820184 | 1.20292115  |
| COL1A2  | 15.78739756 | 14.3745589  | 1.04E-27    | 15.78739756 | 13.98214444 | 2.27E-12    | COLLAGENS          | 1.098287444 | 1.129111319 |
| COL27A1 | 10.41805889 | 9.554815529 | 1.51E-23    | 10.41805889 | 9.362458333 | 5.29E-06    | COLLAGENS          | 1.090346418 | 1.112748225 |
| COL3A1  | 15.90301956 | 14.11161066 | 7.60E-36    | 15.90301956 | 13.97098889 | 6.14E-13    | COLLAGENS          | 1.126945743 | 1.138288756 |
| COL4A1  | 14.312298   | 13.10463265 | 8.31E-39    | 14.312298   | 12.67856389 | 3.70E-15    | BASEMENT_MEMBRANES | 1.092155605 | 1.128857978 |
| COL4A1  | 14.312298   | 13.10463265 | 8.31E-39    | 14.312298   | 12.67856389 | 3.70E-15    | COLLAGENS          | 1.092155605 | 1.128857978 |
| COL4A2  | 14.33370444 | 13.38834677 | 5.52E-26    | 14.33370444 | 13.50583611 | 3.76E-05    | BASEMENT_MEMBRANES | 1.070610486 | 1.061297081 |
| COL4A2  | 14.33370444 | 13.38834677 | 5.52E-26    | 14.33370444 | 13.50583611 | 3.76E-05    | COLLAGENS          | 1.070610486 | 1.061297081 |
| COL5A1  | 13.50273756 | 11.66527755 | 1.64E-54    | 13.50273756 | 12.01277222 | 6.80E-10    | COLLAGENS          | 1.157515327 | 1.124031764 |
| COL5A2  | 12.74541111 | 11.39125581 | 2.49E-36    | 12.74541111 | 10.85533333 | 1.39E-16    | COLLAGENS          | 1.118876735 | 1.17411513  |
| COL5A3  | 9.881122667 | 9.425908801 | 4.62E-07    | 9.881122667 | 8.778491667 | 1.01E-07    | COLLAGENS          | 1.048293897 | 1.125605974 |
| COL6A3  | 14.51064333 | 12.4598605  | 8.50E-54    | 14.51064333 | 13.19758056 | 7.39E-08    | COLLAGENS          | 1.164591155 | 1.099492689 |
| COL6A3  | 14.51064333 | 12.4598605  | 8.50E-54    | 14.51064333 | 13.19758056 | 7.39E-08    | BASEMENT_MEMBRANES | 1.164591155 | 1.099492689 |
| COL7A1  | 9.744857111 | 9.209955931 | 3.87E-05    | 9.744857111 | 7.794313889 | 2.76E-10    | COLLAGENS          | 1.058078582 | 1.250252075 |
| COL8A1  | 10.79210911 | 9.734282292 | 4.42E-16    | 10.79210911 | 8.962394444 | 3.22E-08    | COLLAGENS          | 1.108670243 | 1.204154668 |
| COL9A1  | 6.450487111 | 3.736297098 | 1.38E-87    | 6.450487111 | 5.324941667 | 0.004205413 | COLLAGENS          | 1.726438488 | 1.211372352 |
| CRLF3   | 9.634607778 | 8.988405963 | 8.11E-53    | 9.634607778 | 9.116372222 | 3.03E-07    | SECRETED_FACTORS   | 1.071892816 | 1.056846687 |
| CSF2    | 3.302427111 | 1.948265976 | 4.62E-37    | 3.302427111 | 0.944919444 | 1.38E-10    | SECRETED_FACTORS   | 1.695059685 | 3.494929785 |
| CSH2    | 0.594325778 | 0.421791061 | 0.00155685  | 0.594325778 | 0           | 0.005088807 | SECRETED_FACTORS   | 1.409052569 | Inf         |
| CST1    | 9.709013556 | 4.675118846 | 2.64E-150   | 9.709013556 | 2.778716667 | 5.69E-29    | ECM_REGULATORS     | 2.076741549 | 3.494063886 |
| CST2    | 5.754231778 | 3.474976626 | 5.65E-62    | 5.754231778 | 2.942344444 | 1.26E-11    | ECM_REGULATORS     | 1.655905175 | 1.955662189 |
| CST4    | 3.510344444 | 2.050409364 | 1.58E-32    | 3.510344444 | 0.336883333 | 6.17E-13    | ECM_REGULATORS     | 1.71202127  | 10.4200597  |
| CSTL1   | 1.122179556 | 0.510782866 | 2.11E-40    | 1.122179556 | 0.398558333 | 0.001680396 | ECM_REGULATORS     | 2.196979639 | 2.815596769 |
| CTHRC1  | 9.938579333 | 9.01501605  | 1.02E-13    | 9.938579333 | 6.815844444 | 4.43E-24    | ECM_GLYCOPROTEINS  | 1.102447215 | 1.45815818  |
| CTSA    | 13.68244667 | 12.74033457 | 7.01E-98    | 13.68244667 | 12.935775   | 1.10E-07    | ECM_REGULATORS     | 1.073947203 | 1.057721448 |
| CTSC    | 12.74138356 | 12.11148266 | 4.42E-17    | 12.74138356 | 11.80356389 | 4.84E-10    | ECM_REGULATORS     | 1.05200857  | 1.079452246 |

|         |             |             |             |             |             |             |                    |             |             |
|---------|-------------|-------------|-------------|-------------|-------------|-------------|--------------------|-------------|-------------|
| CTSD    | 15.30379733 | 15.17742801 | 0.015206619 | 15.30379733 | 14.86923333 | 0.001033208 | ECM_REGULATORS     | 1.008326136 | 1.029225717 |
| CTSH    | 12.65691889 | 12.1334887  | 3.32E-14    | 12.65691889 | 11.99398889 | 0.000511006 | ECM_REGULATORS     | 1.043139298 | 1.055271854 |
| CTSK    | 11.20556733 | 10.28017202 | 4.85E-20    | 11.20556733 | 10.68377222 | 0.010118662 | ECM_REGULATORS     | 1.090017493 | 1.04883997  |
| CTSS    | 12.70831622 | 11.2836481  | 5.68E-83    | 12.70831622 | 11.78918056 | 1.83E-06    | ECM_REGULATORS     | 1.126259532 | 1.077964339 |
| CTSV    | 8.511077778 | 7.231072045 | 8.96E-24    | 8.511077778 | 6.710436111 | 6.55E-08    | ECM_REGULATORS     | 1.177014656 | 1.268334522 |
| CXCL1   | 10.35122733 | 6.556732015 | 1.83E-133   | 10.35122733 | 7.379027778 | 1.01E-13    | SECRETED_FACTORS   | 1.578717463 | 1.40279013  |
| CXCL10  | 9.251250444 | 8.345707122 | 5.19E-12    | 9.251250444 | 7.073405556 | 6.91E-10    | SECRETED_FACTORS   | 1.108504086 | 1.307891987 |
| CXCL11  | 7.910064444 | 6.342739488 | 6.47E-34    | 7.910064444 | 5.419202778 | 2.20E-11    | SECRETED_FACTORS   | 1.247105365 | 1.459636181 |
| CXCL13  | 8.765910889 | 6.191608355 | 2.11E-55    | 8.765910889 | 7.303997222 | 0.001084193 | SECRETED_FACTORS   | 1.415772831 | 1.20015255  |
| CXCL2   | 9.360149778 | 6.828612117 | 1.53E-94    | 9.360149778 | 8.613730556 | 0.014581648 | SECRETED_FACTORS   | 1.370725063 | 1.086654582 |
| CXCL3   | 9.554197556 | 4.889910098 | 0           | 9.554197556 | 7.287705556 | 2.74E-09    | SECRETED_FACTORS   | 1.953859553 | 1.311002137 |
| CXCL5   | 9.53692     | 4.732781069 | 1.67E-200   | 9.53692     | 7.111666667 | 0.000316455 | SECRETED_FACTORS   | 2.015077364 | 1.341024607 |
| CXCL6   | 6.366538222 | 4.336360895 | 4.18E-38    | 6.366538222 | 3.777161111 | 5.06E-09    | SECRETED_FACTORS   | 1.468175361 | 1.685535256 |
| CXCL8   | 10.433952   | 7.779989041 | 2.64E-87    | 10.433952   | 7.613883333 | 7.65E-12    | SECRETED_FACTORS   | 1.341126825 | 1.370385064 |
| CXCL9   | 10.74646378 | 8.857239179 | 2.95E-39    | 10.74646378 | 8.282894444 | 6.14E-11    | SECRETED_FACTORS   | 1.213297232 | 1.297428556 |
| DMBT1   | 11.99001533 | 4.525549118 | 0           | 11.99001533 | 10.16876944 | 0.012122999 | ECM_GLYCOPROTEINS  | 2.649405635 | 1.179101896 |
| DMP1    | 2.035884889 | 1.378079634 | 1.36E-19    | 2.035884889 | 0.480102778 | 8.27E-07    | ECM_GLYCOPROTEINS  | 1.477334719 | 4.24051887  |
| DSPP    | 1.123386667 | 0.492041358 | 3.27E-49    | 1.123386667 | 0.292394444 | 0.000736743 | ECM_GLYCOPROTEINS  | 2.28311431  | 3.842024662 |
| EGFL6   | 6.883437333 | 5.7928      | 2.16E-13    | 6.883437333 | 4.733863889 | 1.99E-11    | SECRETED_FACTORS   | 1.18827464  | 1.454084337 |
| ELFN1   | 7.415106889 | 6.692110066 | 1.82E-15    | 7.415106889 | 6.562619444 | 1.25E-06    | ECM_AFFILIATED     | 1.108037198 | 1.129900484 |
| EMILIN2 | 9.602762444 | 9.320936395 | 0.000151632 | 9.602762444 | 8.726152778 | 2.61E-07    | ECM_GLYCOPROTEINS  | 1.030235809 | 1.100457749 |
| EPYC    | 2.809829111 | 2.536326265 | 0.042743585 | 2.809829111 | 0.821438889 | 8.07E-06    | PROTEOGLYCANS      | 1.107834252 | 3.420618562 |
| EYS     | 5.382029111 | 4.186296216 | 1.29E-67    | 5.382029111 | 4.80965     | 0.001866105 | ECM_GLYCOPROTEINS  | 1.285630264 | 1.119006396 |
| F12     | 7.983059778 | 7.100190636 | 2.32E-13    | 7.983059778 | 6.4057      | 6.84E-07    | ECM_REGULATORS     | 1.124344428 | 1.246243155 |
| F2      | 2.588225333 | 2.08297719  | 0.002941795 | 2.588225333 | 1.707352778 | 0.028329502 | ECM_REGULATORS     | 1.242560574 | 1.51592885  |
| FASLG   | 5.173983778 | 4.123316518 | 1.53E-27    | 5.173983778 | 4.484719444 | 0.012744792 | SECRETED_FACTORS   | 1.254811207 | 1.15369174  |
| FBN1    | 12.23087289 | 11.07984782 | 1.87E-36    | 12.23087289 | 11.70960833 | 0.032306184 | ECM_GLYCOPROTEINS  | 1.103884556 | 1.044515968 |
| FBN2    | 7.556540444 | 7.144258567 | 0.001216384 | 7.556540444 | 6.754675    | 0.002738049 | ECM_GLYCOPROTEINS  | 1.057708141 | 1.118712661 |
| FGF18   | 6.339259556 | 4.782199904 | 1.43E-44    | 6.339259556 | 5.788811111 | 0.044051313 | SECRETED_FACTORS   | 1.325594848 | 1.095088341 |
| FGF19   | 3.034992    | 1.643065402 | 4.96E-29    | 3.034992    | 0.393547222 | 8.85E-08    | SECRETED_FACTORS   | 1.847152278 | 7.711887745 |
| FGF20   | 2.316928444 | 1.844686926 | 1.48E-07    | 2.316928444 | 1.284263889 | 0.0120597   | SECRETED_FACTORS   | 1.256000903 | 1.804090627 |
| FGF23   | 1.570236889 | 0.469638924 | 8.85E-89    | 1.570236889 | 0.893605556 | 0.044880985 | SECRETED_FACTORS   | 3.34349818  | 1.757192398 |
| FGF3    | 0.985761556 | 0.3792103   | 1.18E-21    | 0.985761556 | 0.169688889 | 0.014830767 | SECRETED_FACTORS   | 2.599511554 | 5.809228654 |
| FGF4    | 1.301984889 | 0.406171312 | 4.31E-36    | 1.301984889 | 0.777297222 | 0.046871838 | SECRETED_FACTORS   | 3.205506769 | 1.675015492 |
| FNDC1   | 10.21330578 | 8.021472757 | 8.65E-48    | 10.21330578 | 6.933008333 | 1.44E-14    | ECM_GLYCOPROTEINS  | 1.27324571  | 1.473142002 |
| FNDC8   | 1.37334     | 1.161960077 | 1.24E-05    | 1.37334     | 0.842011111 | 0.005747283 | ECM_GLYCOPROTEINS  | 1.181916683 | 1.631023608 |
| HABP2   | 8.261086889 | 4.336069366 | 1.56E-95    | 8.261086889 | 6.897988889 | 0.019524205 | ECM_REGULATORS     | 1.905201737 | 1.197608031 |
| HAPLN3  | 9.011324    | 8.519183557 | 1.74E-08    | 9.011324    | 7.544372222 | 5.29E-12    | PROTEOGLYCANS      | 1.057768499 | 1.194443187 |
| HMCN1   | 9.091628444 | 8.682149989 | 0.000178737 | 9.091628444 | 8.467694444 | 0.033291012 | ECM_GLYCOPROTEINS  | 1.047163255 | 1.073684048 |
| HMCN1   | 9.091628444 | 8.682149989 | 0.000178737 | 9.091628444 | 8.467694444 | 0.033291012 | BASEMENT_MEMBRANES | 1.047163255 | 1.073684048 |
| HPSE    | 8.955951333 | 7.671407813 | 9.42E-67    | 8.955951333 | 7.741355556 | 6.83E-09    | ECM_REGULATORS     | 1.167445605 | 1.156897041 |
| HSPG2   | 14.97598978 | 13.25809189 | 2.48E-130   | 14.97598978 | 14.51063056 | 0.019386653 | PROTEOGLYCANS      | 1.129573539 | 1.032070227 |
| HSPG2   | 14.97598978 | 13.25809189 | 2.48E-130   | 14.97598978 | 14.51063056 | 0.019386653 | BASEMENT_MEMBRANES | 1.129573539 | 1.032070227 |
| HTRA3   | 10.85178089 | 9.118383418 | 9.67E-49    | 10.85178089 | 10.22499167 | 0.013140961 | ECM_REGULATORS     | 1.190099208 | 1.061299729 |
| HTRA4   | 3.934204222 | 3.38454054  | 4.68E-09    | 3.934204222 | 1.358152778 | 2.83E-18    | ECM_REGULATORS     | 1.162404225 | 2.896731713 |
| HYAL4   | 1.894647556 | 1.270187372 | 2.67E-13    | 1.894647556 | 1.178613889 | 0.012489327 | ECM_REGULATORS     | 1.491628398 | 1.60752183  |

|               |             |             |             |             |             |             |                    |             |             |
|---------------|-------------|-------------|-------------|-------------|-------------|-------------|--------------------|-------------|-------------|
| <b>IBSP</b>   | 3.688607111 | 3.204938584 | 0.000153379 | 3.688607111 | 0.204741667 | 1.69E-15    | ECM_GLYCOPROTEINS  | 1.150913509 | 18.01590839 |
| <b>IGFBP1</b> | 3.393523111 | 3.017202849 | 0.023932315 | 3.393523111 | 0.921875    | 1.84E-07    | ECM_GLYCOPROTEINS  | 1.12472488  | 3.681109815 |
| <b>IGFBP3</b> | 12.84558    | 12.42794167 | 6.25E-05    | 12.84558    | 11.58416944 | 8.76E-09    | ECM_GLYCOPROTEINS  | 1.033604787 | 1.108890893 |
| <b>IGFBP7</b> | 14.015228   | 13.4033764  | 8.28E-23    | 14.015228   | 13.37991944 | 0.000902061 | ECM_GLYCOPROTEINS  | 1.045649065 | 1.047482241 |
| <b>IMPG1</b>  | 3.517167333 | 2.643124979 | 1.26E-32    | 3.517167333 | 2.164197222 | 5.70E-09    | PROTEOGLYCANS      | 1.330685216 | 1.625160266 |
| <b>KCP</b>    | 6.559173333 | 5.94710912  | 9.85E-08    | 6.559173333 | 5.566794444 | 0.000110822 | ECM_GLYCOPROTEINS  | 1.102917939 | 1.178267565 |
| <b>LAMA3</b>  | 11.85473089 | 9.61444257  | 3.10E-68    | 11.85473089 | 10.91919444 | 0.000760023 | ECM_GLYCOPROTEINS  | 1.233012814 | 1.085678156 |
| <b>LAMA3</b>  | 11.85473089 | 9.61444257  | 3.10E-68    | 11.85473089 | 10.91919444 | 0.000760023 | BASEMENT_MEMBRANES | 1.233012814 | 1.085678156 |
| <b>LAMA5</b>  | 13.15700356 | 12.30493433 | 1.31E-36    | 13.15700356 | 12.47625278 | 0.002165853 | ECM_GLYCOPROTEINS  | 1.069246141 | 1.054563721 |
| <b>LAMA5</b>  | 13.15700356 | 12.30493433 | 1.31E-36    | 13.15700356 | 12.47625278 | 0.002165853 | BASEMENT_MEMBRANES | 1.069246141 | 1.054563721 |
| <b>LAMB1</b>  | 12.69907889 | 12.17469109 | 1.11E-10    | 12.69907889 | 11.81490833 | 9.44E-09    | ECM_GLYCOPROTEINS  | 1.043071959 | 1.07483516  |
| <b>LAMB1</b>  | 12.69907889 | 12.17469109 | 1.11E-10    | 12.69907889 | 11.81490833 | 9.44E-09    | BASEMENT_MEMBRANES | 1.043071959 | 1.07483516  |
| <b>LAMB3</b>  | 12.75482422 | 10.59206818 | 4.29E-55    | 12.75482422 | 11.19830556 | 4.78E-08    | ECM_GLYCOPROTEINS  | 1.204186379 | 1.13899591  |
| <b>LAMB3</b>  | 12.75482422 | 10.59206818 | 4.29E-55    | 12.75482422 | 11.19830556 | 4.78E-08    | BASEMENT_MEMBRANES | 1.204186379 | 1.13899591  |
| <b>LAMC1</b>  | 13.27702556 | 12.78046788 | 1.71E-14    | 13.27702556 | 12.90646389 | 0.041783618 | BASEMENT_MEMBRANES | 1.038852856 | 1.028711324 |
| <b>LAMC1</b>  | 13.27702556 | 12.78046788 | 1.71E-14    | 13.27702556 | 12.90646389 | 0.041783618 | ECM_GLYCOPROTEINS  | 1.038852856 | 1.028711324 |
| <b>LAMC2</b>  | 12.40610222 | 9.831347513 | 4.91E-42    | 12.40610222 | 10.18286111 | 5.52E-14    | BASEMENT_MEMBRANES | 1.261892351 | 1.218331674 |
| <b>LAMC2</b>  | 12.40610222 | 9.831347513 | 4.91E-42    | 12.40610222 | 10.18286111 | 5.52E-14    | ECM_GLYCOPROTEINS  | 1.261892351 | 1.218331674 |
| <b>LGALS2</b> | 8.024652222 | 5.195708291 | 9.57E-98    | 8.024652222 | 6.975825    | 0.015234767 | ECM_AFFILIATED     | 1.544477052 | 1.150351711 |
| <b>LGALS4</b> | 13.34649756 | 4.772168591 | 0           | 13.34649756 | 11.476125   | 0.000123982 | ECM_AFFILIATED     | 2.79673639  | 1.162979451 |
| <b>LGALS8</b> | 11.67006911 | 11.28158572 | 2.06E-19    | 11.67006911 | 11.18103056 | 7.80E-07    | ECM_AFFILIATED     | 1.034435176 | 1.043738236 |
| <b>LGALS9</b> | 12.45254667 | 10.7310062  | 2.93E-136   | 12.45254667 | 11.70815    | 0.000319805 | ECM_AFFILIATED     | 1.160426752 | 1.063579359 |
| <b>LOX</b>    | 10.39019089 | 9.477059811 | 6.34E-19    | 10.39019089 | 9.126238889 | 3.76E-09    | ECM_REGULATORS     | 1.096351727 | 1.138496484 |
| <b>LOXL1</b>  | 10.46247156 | 9.197010938 | 1.18E-39    | 10.46247156 | 9.898422222 | 0.003246313 | ECM_REGULATORS     | 1.137594771 | 1.056983762 |
| <b>LOXL2</b>  | 11.24972867 | 10.07428463 | 1.46E-43    | 11.24972867 | 9.805772222 | 3.32E-13    | ECM_REGULATORS     | 1.116677668 | 1.14725576  |
| <b>LTBP2</b>  | 11.99744933 | 11.2331707  | 2.87E-16    | 11.99744933 | 11.34945556 | 0.003094461 | ECM_GLYCOPROTEINS  | 1.068037659 | 1.057094702 |
| <b>LUM</b>    | 13.825864   | 11.42934962 | 1.43E-55    | 13.825864   | 12.93931944 | 0.000267376 | PROTEOGLYCANS      | 1.209680731 | 1.068515547 |
| <b>MATN3</b>  | 7.007406667 | 6.493302349 | 2.07E-06    | 7.007406667 | 5.030638889 | 1.55E-09    | ECM_GLYCOPROTEINS  | 1.079174554 | 1.392945672 |
| <b>MFAP2</b>  | 9.757172    | 9.073903157 | 3.13E-07    | 9.757172    | 7.861247222 | 8.36E-12    | ECM_GLYCOPROTEINS  | 1.075300434 | 1.241173534 |
| <b>MMP1</b>   | 10.780812   | 6.627750723 | 7.17E-104   | 10.780812   | 7.7176      | 1.44E-10    | ECM_REGULATORS     | 1.626617    | 1.396912512 |
| <b>MMP10</b>  | 5.874649333 | 4.533528019 | 3.21E-14    | 5.874649333 | 3.301372222 | 4.46E-10    | ECM_REGULATORS     | 1.29582288  | 1.779456825 |
| <b>MMP11</b>  | 11.03384422 | 9.858270961 | 2.06E-17    | 11.03384422 | 7.622777778 | 1.60E-20    | ECM_REGULATORS     | 1.119247408 | 1.44748339  |
| <b>MMP12</b>  | 9.484455778 | 5.270708918 | 4.38E-118   | 9.484455778 | 6.371233333 | 4.41E-10    | ECM_REGULATORS     | 1.799464916 | 1.48863733  |
| <b>MMP14</b>  | 13.32404622 | 12.90987096 | 1.11E-06    | 13.32404622 | 12.34501944 | 1.11E-09    | ECM_REGULATORS     | 1.032082061 | 1.079305406 |
| <b>MMP15</b>  | 12.28964956 | 10.64786643 | 2.23E-113   | 12.28964956 | 11.66650833 | 0.001560212 | ECM_REGULATORS     | 1.154188929 | 1.05341283  |
| <b>MMP19</b>  | 8.931064444 | 7.890906824 | 3.67E-35    | 8.931064444 | 8.414872222 | 0.007063884 | ECM_REGULATORS     | 1.131817248 | 1.061342847 |
| <b>MMP3</b>   | 7.836351111 | 4.142292602 | 2.57E-93    | 7.836351111 | 4.33435     | 8.51E-10    | ECM_REGULATORS     | 1.891790818 | 1.807964542 |
| <b>MMP7</b>   | 9.637948222 | 8.135262776 | 3.92E-14    | 9.637948222 | 6.045947222 | 2.73E-10    | ECM_REGULATORS     | 1.184712589 | 1.594117161 |
| <b>MMP8</b>   | 2.553130667 | 1.926423533 | 1.32E-08    | 2.553130667 | 0.400688889 | 1.90E-09    | ECM_REGULATORS     | 1.325321573 | 6.37185292  |
| <b>MMP9</b>   | 10.09875089 | 9.293933642 | 6.57E-09    | 10.09875089 | 7.727013889 | 3.43E-12    | ECM_REGULATORS     | 1.086595975 | 1.306940952 |
| <b>MUC1</b>   | 13.74801689 | 10.66424837 | 1.82E-82    | 13.74801689 | 12.69809444 | 0.00287361  | ECM_AFFILIATED     | 1.289168857 | 1.082683465 |
| <b>MUC12</b>  | 8.543143556 | 4.426734354 | 1.46E-258   | 8.543143556 | 6.098691667 | 7.50E-06    | ECM_AFFILIATED     | 1.929897498 | 1.400815785 |
| <b>MUC13</b>  | 13.34371733 | 3.871153997 | 0           | 13.34371733 | 10.29103333 | 4.26E-10    | ECM_AFFILIATED     | 3.446961125 | 1.296635323 |
| <b>MUC17</b>  | 11.16074044 | 0.657567474 | 0           | 11.16074044 | 9.240544444 | 0.007719749 | ECM_AFFILIATED     | 16.97276839 | 1.207801176 |
| <b>MUC3A</b>  | 12.06082533 | 5.869215593 | 0           | 12.06082533 | 9.356169444 | 1.73E-07    | ECM_AFFILIATED     | 2.054929682 | 1.289077267 |
| <b>MUC5B</b>  | 10.54449444 | 5.562827041 | 4.52E-123   | 10.54449444 | 8.696797222 | 0.006640958 | ECM_AFFILIATED     | 1.895528005 | 1.212457204 |



|                 |             |             |             |             |             |             |                    |             |             |
|-----------------|-------------|-------------|-------------|-------------|-------------|-------------|--------------------|-------------|-------------|
| <b>MXRA5</b>    | 13.03528978 | 10.90338756 | 1.34E-66    | 13.03528978 | 11.52289722 | 1.84E-10    | ECM_GLYCOPROTEINS  | 1.195526592 | 1.131251067 |
| <b>NGLY1</b>    | 10.07889067 | 9.959465731 | 2.38E-05    | 10.07889067 | 9.881375    | 0.025173668 | ECM_REGULATORS     | 1.011991099 | 1.019988682 |
| <b>NID2</b>     | 10.52273889 | 9.115427105 | 3.38E-50    | 10.52273889 | 9.176313889 | 3.99E-09    | ECM_GLYCOPROTEINS  | 1.154387915 | 1.146728307 |
| <b>NID2</b>     | 10.52273889 | 9.115427105 | 3.38E-50    | 10.52273889 | 9.176313889 | 3.99E-09    | BASEMENT_MEMBRANES | 1.154387915 | 1.146728307 |
| <b>NTNG2</b>    | 6.394661778 | 5.95492044  | 1.25E-05    | 6.394661778 | 5.967911111 | 0.0361571   | BASEMENT_MEMBRANES | 1.07384504  | 1.071507544 |
| <b>NTNG2</b>    | 6.394661778 | 5.95492044  | 1.25E-05    | 6.394661778 | 5.967911111 | 0.0361571   | ECM_GLYCOPROTEINS  | 1.07384504  | 1.071507544 |
| <b>OGFOD1</b>   | 10.62352556 | 10.45417434 | 1.94E-12    | 10.62352556 | 10.36175278 | 0.001127894 | ECM_REGULATORS     | 1.016199387 | 1.025263368 |
| <b>OIT3</b>     | 4.744170222 | 3.162342453 | 3.20E-44    | 4.744170222 | 3.593138889 | 0.000161971 | ECM_GLYCOPROTEINS  | 1.500207613 | 1.320341453 |
| <b>OTOG</b>     | 1.654464667 | 1.291497704 | 8.42E-05    | 1.654464667 | 0.418186111 | 4.02E-05    | ECM_GLYCOPROTEINS  | 1.281043444 | 3.956287937 |
| <b>PCOLCE</b>   | 11.01975444 | 10.58468347 | 6.65E-07    | 11.01975444 | 10.57139167 | 0.032211444 | ECM_GLYCOPROTEINS  | 1.041103825 | 1.042412843 |
| <b>PLAU</b>     | 11.13289267 | 10.53550347 | 7.81E-09    | 11.13289267 | 9.424855556 | 1.45E-14    | ECM_REGULATORS     | 1.056702483 | 1.181226874 |
| <b>PLOD3</b>    | 12.31784178 | 11.61495715 | 4.79E-44    | 12.31784178 | 10.86550556 | 1.97E-17    | ECM_REGULATORS     | 1.060515473 | 1.133664855 |
| <b>PLXDC1</b>   | 9.546927333 | 8.810221397 | 1.42E-26    | 9.546927333 | 8.699297222 | 8.15E-07    | ECM_AFFILIATED     | 1.083619458 | 1.097436619 |
| <b>PLXNA1</b>   | 12.011132   | 11.47403255 | 2.64E-18    | 12.011132   | 10.83508056 | 1.93E-14    | ECM_AFFILIATED     | 1.046809999 | 1.108541089 |
| <b>PLXNA3</b>   | 11.22321533 | 10.69586156 | 2.48E-23    | 11.22321533 | 10.233925   | 1.22E-09    | ECM_AFFILIATED     | 1.049304468 | 1.096667733 |
| <b>PLXNB1</b>   | 11.99301667 | 11.84458584 | 0.013241308 | 11.99301667 | 11.44999722 | 0.000518602 | ECM_AFFILIATED     | 1.012531534 | 1.04742529  |
| <b>PLXNB2</b>   | 14.38407889 | 13.6445309  | 5.78E-70    | 14.38407889 | 14.07644167 | 0.015299843 | ECM_AFFILIATED     | 1.054201056 | 1.021854758 |
| <b>PLXND1</b>   | 12.19908733 | 11.89022243 | 1.91E-08    | 12.19908733 | 11.29818333 | 1.12E-07    | ECM_AFFILIATED     | 1.025976377 | 1.079738837 |
| <b>PODNL1</b>   | 7.686152222 | 6.538444441 | 9.91E-27    | 7.686152222 | 6.407372222 | 8.55E-08    | PROTEOGLYCANS      | 1.175532237 | 1.199579477 |
| <b>POSTN</b>    | 12.85119822 | 10.68835551 | 1.23E-36    | 12.85119822 | 12.23900278 | 0.017231599 | ECM_GLYCOPROTEINS  | 1.20235505  | 1.050020043 |
| <b>PRSS3</b>    | 10.78949444 | 3.83222702  | 0           | 10.78949444 | 10.00613611 | 0.018032004 | ECM_REGULATORS     | 2.815463277 | 1.078287795 |
| <b>PXDN</b>     | 11.63657644 | 11.25497626 | 1.74E-05    | 11.63657644 | 10.57374722 | 1.58E-07    | ECM_GLYCOPROTEINS  | 1.033905019 | 1.100515853 |
| <b>REG4</b>     | 11.38451    | 1.936207302 | 0           | 11.38451    | 9.385597222 | 0.006036422 | ECM_AFFILIATED     | 5.879799124 | 1.212976621 |
| <b>SDC1</b>     | 13.06162622 | 12.36422045 | 4.77E-08    | 13.06162622 | 12.29052222 | 0.006301894 | ECM_AFFILIATED     | 1.056405155 | 1.062739726 |
| <b>SDC4</b>     | 13.43246667 | 12.80251828 | 1.11E-13    | 13.43246667 | 12.87870833 | 0.001041967 | ECM_AFFILIATED     | 1.049205037 | 1.042997971 |
| <b>SEMA4D</b>   | 10.76442178 | 10.40990058 | 1.56E-10    | 10.76442178 | 10.40602778 | 0.010007144 | ECM_AFFILIATED     | 1.034056156 | 1.034441    |
| <b>SEMA4G</b>   | 11.26400133 | 8.233080251 | 7.46E-261   | 11.26400133 | 9.982061111 | 4.39E-07    | ECM_AFFILIATED     | 1.368139383 | 1.128424401 |
| <b>SEMA5A</b>   | 9.894536667 | 9.681341964 | 0.031243534 | 9.894536667 | 9.446891667 | 0.037005266 | ECM_AFFILIATED     | 1.022021193 | 1.047385427 |
| <b>SEMA6B</b>   | 9.286624889 | 8.793950223 | 7.45E-12    | 9.286624889 | 8.677583333 | 0.000576141 | ECM_AFFILIATED     | 1.056024273 | 1.070185619 |
| <b>SEMA7A</b>   | 8.918727556 | 8.475128954 | 5.19E-08    | 8.918727556 | 8.173902778 | 0.00071903  | ECM_AFFILIATED     | 1.052341221 | 1.091122295 |
| <b>SERPINA1</b> | 13.24141467 | 11.79513816 | 1.08E-19    | 13.24141467 | 11.41300833 | 1.60E-05    | ECM_REGULATORS     | 1.122616326 | 1.160203715 |
| <b>SERPINA4</b> | 7.145585778 | 2.266563977 | 5.91E-176   | 7.145585778 | 5.688380556 | 0.010469421 | ECM_REGULATORS     | 3.15260714  | 1.256172246 |
| <b>SERPINB5</b> | 10.87661533 | 5.535738191 | 6.80E-114   | 10.87661533 | 8.913827778 | 3.41E-05    | ECM_REGULATORS     | 1.964799446 | 1.220195813 |
| <b>SERPINB9</b> | 10.28189844 | 9.199020844 | 7.86E-64    | 10.28189844 | 9.604122222 | 0.000315752 | ECM_REGULATORS     | 1.117716616 | 1.070571387 |
| <b>SERPINE1</b> | 11.28036733 | 10.74768977 | 8.95E-07    | 11.28036733 | 9.449688889 | 1.17E-10    | ECM_REGULATORS     | 1.049562052 | 1.193728965 |
| <b>SERPINH1</b> | 12.93389489 | 12.68452609 | 0.000241792 | 12.93389489 | 11.48178333 | 2.92E-19    | ECM_REGULATORS     | 1.019659291 | 1.126470907 |
| <b>SPON2</b>    | 11.24789489 | 10.24663644 | 4.49E-19    | 11.24789489 | 10.39352778 | 3.58E-06    | ECM_GLYCOPROTEINS  | 1.097715817 | 1.08220184  |
| <b>SRPX2</b>    | 8.381263333 | 7.587607153 | 7.22E-13    | 8.381263333 | 7.791197222 | 0.007089993 | ECM_GLYCOPROTEINS  | 1.104599008 | 1.075734973 |
| <b>ST14</b>     | 13.45612822 | 11.48217639 | 1.93E-57    | 13.45612822 | 11.97865556 | 2.56E-09    | ECM_REGULATORS     | 1.171914432 | 1.123342111 |
| <b>SULF1</b>    | 12.53068556 | 10.89942983 | 7.41E-43    | 12.53068556 | 10.20347778 | 5.49E-14    | ECM_REGULATORS     | 1.149664318 | 1.228079859 |
| <b>SULF2</b>    | 12.58987444 | 11.71216418 | 1.57E-27    | 12.58987444 | 11.63905556 | 2.74E-06    | ECM_REGULATORS     | 1.074940058 | 1.0816921   |
| <b>TGFBI</b>    | 12.73359622 | 12.17238885 | 4.56E-09    | 12.73359622 | 12.04849722 | 0.001356618 | ECM_GLYCOPROTEINS  | 1.046104949 | 1.05686178  |
| <b>TGM2</b>     | 13.53918311 | 12.01897952 | 3.01E-62    | 13.53918311 | 12.86103889 | 0.002707094 | ECM_REGULATORS     | 1.126483583 | 1.052728573 |
| <b>THBS1</b>    | 13.651726   | 12.14261519 | 1.69E-44    | 13.651726   | 13.06033889 | 0.019802709 | ECM_GLYCOPROTEINS  | 1.12428219  | 1.045281146 |
| <b>THBS2</b>    | 11.84119689 | 11.11429101 | 6.90E-11    | 11.84119689 | 9.501916667 | 4.49E-12    | ECM_GLYCOPROTEINS  | 1.065402812 | 1.246190353 |
| <b>TIMP1</b>    | 14.20954578 | 13.01940428 | 3.94E-44    | 14.20954578 | 12.64195    | 5.20E-14    | ECM_REGULATORS     | 1.091412899 | 1.123999524 |

|                |             |             |             |             |             |             |                   |             |             |
|----------------|-------------|-------------|-------------|-------------|-------------|-------------|-------------------|-------------|-------------|
| <b>TINAG</b>   | 4.209975333 | 1.575004602 | 1.56E-66    | 4.209975333 | 2.8214      | 0.008594082 | ECM_GLYCOPROTEINS | 2.672992401 | 1.492158267 |
| <b>TINAGL1</b> | 12.17423156 | 10.44053464 | 1.33E-69    | 12.17423156 | 11.448325   | 3.95E-06    | ECM_GLYCOPROTEINS | 1.166054419 | 1.063407228 |
| <b>TNFAIP6</b> | 7.438055333 | 6.456752307 | 1.44E-15    | 7.438055333 | 6.621619444 | 0.002266519 | ECM_GLYCOPROTEINS | 1.1519809   | 1.123298522 |
| <b>TSPEAR</b>  | 4.212367556 | 2.483923895 | 6.05E-66    | 4.212367556 | 3.134252778 | 0.001647062 | ECM_GLYCOPROTEINS | 1.695852101 | 1.343978248 |
| <b>VCAN</b>    | 12.61271044 | 11.6322721  | 1.53E-17    | 12.61271044 | 10.87264167 | 1.47E-11    | PROTEOGLYCANS     | 1.084286057 | 1.160041031 |
| <b>WISP1</b>   | 8.431896222 | 7.255730357 | 7.08E-26    | 8.431896222 | 6.486747222 | 4.82E-11    | ECM_GLYCOPROTEINS | 1.16210165  | 1.299865084 |
| <b>WISP3</b>   | 5.613243333 | 4.021015402 | 6.87E-56    | 5.613243333 | 4.527647222 | 0.00216102  | ECM_GLYCOPROTEINS | 1.395976581 | 1.239770472 |
| <b>WNT2</b>    | 7.018146667 | 5.44718666  | 2.64E-27    | 7.018146667 | 2.896480556 | 1.10E-23    | SECRETED_FACTORS  | 1.288398416 | 2.42299112  |
| <b>WNT5A</b>   | 10.14453956 | 8.979624458 | 9.63E-26    | 10.14453956 | 9.235061111 | 5.89E-05    | SECRETED_FACTORS  | 1.12972871  | 1.098481042 |
| <b>WNT8B</b>   | 2.700165111 | 1.719004804 | 5.38E-39    | 2.700165111 | 1.233094444 | 8.72E-08    | SECRETED_FACTORS  | 1.570772289 | 2.189747203 |
| <b>VWA1</b>    | 12.42854844 | 11.49001339 | 1.06E-41    | 12.42854844 | 12.0278     | 0.020532188 | ECM_GLYCOPROTEINS | 1.081682677 | 1.033318516 |
| <b>VWA3B</b>   | 4.741314444 | 3.140936735 | 1.10E-46    | 4.741314444 | 4.147102778 | 0.03969392  | ECM_GLYCOPROTEINS | 1.509522428 | 1.143283564 |
| <b>VWA9</b>    | 10.68596133 | 10.61265181 | 0.000920595 | 10.68596133 | 10.06440278 | 5.35E-12    | ECM_GLYCOPROTEINS | 1.006907748 | 1.061758116 |
| <b>ZFP91</b>   | 12.10707911 | 11.61588412 | 7.68E-59    | 12.10707911 | 11.845475   | 0.001936904 | SECRETED_FACTORS  | 1.042286492 | 1.022084729 |

Testicular germ cell tumor (TGCT)

| Signature genes | Expression in tumor | Expression in rest of Pan-Cancer | P-value     | Expression in tumor | Expression in normal tissue | P-value     | Matrisome category | Fold change vs. Pan-Cancer | Fold change vs. normal |
|-----------------|---------------------|----------------------------------|-------------|---------------------|-----------------------------|-------------|--------------------|----------------------------|------------------------|
| A2M             | 14.48974416         | 14.10091615                      | 0.00758076  | 14.48974416         | 13.23631932                 | 4.83E-45    | ECM_REGULATORS     | 1.027574662                | 1.094695875            |
| ADAM18          | 3.024779221         | 0.43062132                       | 4.62E-148   | 3.024779221         | 2.958575                    | 1.83E-05    | ECM_REGULATORS     | 7.024220771                | 1.022377064            |
| ADAM19          | 10.25900455         | 9.039341063                      | 2.94E-20    | 10.25900455         | 4.969286364                 | 2.22E-156   | ECM_REGULATORS     | 1.134928362                | 2.064482462            |
| ADAM20          | 1.945568831         | 1.723510404                      | 0.014221359 | 1.945568831         | 1.8749125                   | 2.85E-108   | ECM_REGULATORS     | 1.128840782                | 1.037685135            |
| ADAM32          | 5.908311688         | 4.611716375                      | 4.31E-20    | 5.908311688         | 3.996519318                 | 4.18E-48    | ECM_REGULATORS     | 1.28115244                 | 1.478364351            |
| ADAM33          | 8.422316234         | 6.14895825                       | 4.30E-32    | 8.422316234         | 2.576570455                 | 5.79E-22    | ECM_REGULATORS     | 1.369714331                | 3.268808823            |
| ADAM8           | 9.723261039         | 8.866244305                      | 2.52E-09    | 9.723261039         | 1.253972727                 | 1.89E-19    | ECM_REGULATORS     | 1.096660627                | 7.75396532             |
| ADAMDEC1        | 9.192250649         | 6.074119259                      | 2.64E-44    | 9.192250649         | 8.603455682                 | 8.74E-125   | ECM_REGULATORS     | 1.513347081                | 1.068437032            |
| ADAMTS3         | 7.165530519         | 5.8464072                        | 6.38E-18    | 7.165530519         | 2.823254545                 | 0.000575951 | ECM_REGULATORS     | 1.225629737                | 2.538039133            |
| ADAMTS6         | 6.497740909         | 5.759757718                      | 3.19E-07    | 6.497740909         | 0                           | 1.36E-13    | ECM_REGULATORS     | 1.128127471                | Inf                    |
| ADAMTS7         | 9.56698961          | 8.043525123                      | 1.62E-34    | 9.56698961          | 1.104234091                 | 8.94E-99    | ECM_REGULATORS     | 1.189402589                | 8.663914372            |
| ADAMTSL4        | 10.14736299         | 8.819841914                      | 6.84E-20    | 10.14736299         | 0.429810227                 | 1.21E-14    | ECM_REGULATORS     | 1.150515291                | 23.60893795            |
| ADAMTSL5        | 6.944474026         | 6.219341179                      | 9.28E-06    | 6.944474026         | 0.935293182                 | 1.14E-81    | ECM_REGULATORS     | 1.116593193                | 7.424916765            |
| AMH             | 7.377821429         | 4.812156818                      | 3.25E-39    | 7.377821429         | 0.357515909                 | 2.03E-50    | SECRETED_FACTORS   | 1.533163134                | 20.6363444             |
| ANGPT1          | 8.72602987          | 7.111320236                      | 2.66E-22    | 8.72602987          | 2.541519318                 | 4.23E-12    | SECRETED_FACTORS   | 1.227061865                | 3.433391125            |
| ANGPTL5         | 1.757477922         | 1.363457321                      | 0.001276508 | 1.757477922         | 0.079918182                 | 3.05E-93    | SECRETED_FACTORS   | 1.288986384                | 21.99096479            |
| ANXA3           | 9.805933766         | 9.154774867                      | 0.002751325 | 9.805933766         | 3.499820455                 | 0.015956503 | ECM_AFFILIATED     | 1.071127789                | 2.801839092            |
| ANXA6           | 13.35774416         | 12.23810033                      | 4.16E-29    | 13.35774416         | 0.067611364                 | 2.12E-73    | ECM_AFFILIATED     | 1.091488368                | 197.5665545            |
| BCAN            | 7.665983117         | 4.52263364                       | 2.84E-20    | 7.665983117         | 1.5822                      | 6.80E-97    | PROTEOGLYCANS      | 1.695026334                | 4.845141649            |
| BMP7            | 9.124014286         | 8.012745776                      | 0.00025648  | 9.124014286         | 8.190473864                 | 8.68E-83    | SECRETED_FACTORS   | 1.138687604                | 1.113978805            |
| BMP8A           | 4.776299351         | 4.243046569                      | 0.00052084  | 4.776299351         | 1.973632955                 | 3.18E-05    | SECRETED_FACTORS   | 1.125676863                | 2.420054519            |
| C1QA            | 12.68443312         | 11.45343086                      | 4.46E-18    | 12.68443312         | 9.521038636                 | 2.60E-36    | ECM_AFFILIATED     | 1.107478909                | 1.332253087            |
| C1QB            | 12.62134675         | 11.61465161                      | 1.88E-11    | 12.62134675         | 11.57160795                 | 3.03E-13    | ECM_AFFILIATED     | 1.086674588                | 1.090716761            |
| C1QC            | 12.45674091         | 11.45251726                      | 3.57E-12    | 12.45674091         | 6.343613636                 | 3.19E-30    | ECM_AFFILIATED     | 1.087685845                | 1.963666393            |
| C1QTNF9         | 2.757572727         | 2.268579096                      | 0.000224449 | 2.757572727         | 2.696727273                 | 1.50E-06    | ECM_AFFILIATED     | 1.21555062                 | 1.022562702            |
| CCL1            | 1.805602597         | 0.617419046                      | 3.26E-46    | 1.805602597         | 0.614193182                 | 1.14E-147   | SECRETED_FACTORS   | 2.924436183                | 2.939795899            |
| CCL11           | 4.696264935         | 4.024827146                      | 0.00380168  | 4.696264935         | 0.786252273                 | 2.22E-98    | SECRETED_FACTORS   | 1.166824006                | 5.972974703            |
| CCL13           | 5.433473377         | 4.47403663                       | 8.39E-06    | 5.433473377         | 2.6249875                   | 1.38E-122   | SECRETED_FACTORS   | 1.214445438                | 2.069904476            |
| CCL14           | 7.354714286         | 6.785299197                      | 0.00858529  | 7.354714286         | 3.622790909                 | 1.40E-08    | SECRETED_FACTORS   | 1.083918936                | 2.030123866            |
| CCL17           | 4.19380974          | 3.627146966                      | 0.000855451 | 4.19380974          | 3.565842045                 | 6.18E-70    | SECRETED_FACTORS   | 1.156228237                | 1.176106425            |
| CCL18           | 8.031631169         | 7.071676086                      | 0.000405161 | 8.031631169         | 5.106510227                 | 2.71E-16    | SECRETED_FACTORS   | 1.135746472                | 1.57282191             |
| CCL19           | 9.996823377         | 6.208006281                      | 9.31E-49    | 9.996823377         | 9.1442125                   | 0.011567302 | SECRETED_FACTORS   | 1.610311415                | 1.093240492            |
| CCL21           | 8.31929026          | 6.894106697                      | 1.30E-06    | 8.31929026          | 5.462685227                 | 0.000736408 | SECRETED_FACTORS   | 1.206724907                | 1.522930558            |
| CCL24           | 4.441853247         | 2.725102874                      | 3.11E-17    | 4.441853247         | 0.097161364                 | 1.98E-106   | SECRETED_FACTORS   | 1.629976354                | 45.71625058            |
| CCL3            | 8.740666883         | 7.417444943                      | 2.71E-21    | 8.740666883         | 6.340792045                 | 4.14E-108   | SECRETED_FACTORS   | 1.178393227                | 1.378481871            |
| CCL5            | 10.88066818         | 9.357343501                      | 2.56E-20    | 10.88066818         | 9.316761364                 | 4.49E-25    | SECRETED_FACTORS   | 1.162794567                | 1.167859491            |
| CILP2           | 8.859505844         | 6.300295248                      | 1.49E-35    | 8.859505844         | 3.601670455                 | 4.78E-72    | ECM_GLYCOPROTEINS  | 1.406204867                | 2.459832446            |
| CLEC11A         | 9.082371429         | 8.517372438                      | 2.05E-06    | 9.082371429         | 4.235623864                 | 1.35E-37    | ECM_AFFILIATED     | 1.066334893                | 2.144281863            |
| CLEC12A         | 6.706621429         | 5.078986045                      | 6.95E-21    | 6.706621429         | 3.044089773                 | 1.97E-05    | ECM_AFFILIATED     | 1.32046463                 | 2.203161513            |
| CLEC12B         | 3.705198052         | 1.676101665                      | 4.61E-52    | 3.705198052         | 1.214805682                 | 2.53E-13    | ECM_AFFILIATED     | 2.210604601                | 3.050033522            |
| CLEC17A         | 3.622554545         | 2.780440172                      | 2.03E-07    | 3.622554545         | 2.599748864                 | 1.27E-158   | ECM_AFFILIATED     | 1.302870884                | 1.393424802            |

|          |             |             |             |             |             |             |                    |             |             |
|----------|-------------|-------------|-------------|-------------|-------------|-------------|--------------------|-------------|-------------|
| CLEC18C  | 4.618565584 | 3.427894406 | 3.83E-08    | 4.618565584 | 4.195159091 | 1.32E-37    | ECM_AFFILIATED     | 1.347347683 | 1.100927399 |
| CLEC1A   | 7.807029221 | 6.223547285 | 6.73E-41    | 7.807029221 | 1.579334091 | 0.035132149 | ECM_AFFILIATED     | 1.254433985 | 4.94324112  |
| CLEC4A   | 6.925666883 | 6.136338653 | 1.35E-14    | 6.925666883 | 0.693794318 | 3.01E-14    | ECM_AFFILIATED     | 1.128631791 | 9.982305565 |
| CLEC4E   | 7.142075974 | 5.377278622 | 1.99E-29    | 7.142075974 | 4.371936364 | 2.42E-06    | ECM_AFFILIATED     | 1.328195259 | 1.633618466 |
| CLEC9A   | 6.874375325 | 3.469250285 | 2.65E-100   | 6.874375325 | 1.9509875   | 1.74E-84    | ECM_AFFILIATED     | 1.981516108 | 3.523536324 |
| COCH     | 8.265304545 | 6.447597242 | 4.29E-19    | 8.265304545 | 4.182827273 | 1.92E-114   | ECM_GLYCOPROTEINS  | 1.281920107 | 1.97600905  |
| COL11A2  | 6.844648701 | 5.976564638 | 7.76E-07    | 6.844648701 | 3.157593182 | 2.99E-106   | COLLAGENS          | 1.145248001 | 2.167679086 |
| COL13A1  | 7.537797403 | 6.362314633 | 1.08E-14    | 7.537797403 | 4.500606818 | 2.26E-05    | COLLAGENS          | 1.184757095 | 1.67484024  |
| COL14A1  | 10.38097013 | 9.990020255 | 0.030178546 | 10.38097013 | 0.121203409 | 2.58E-27    | COLLAGENS          | 1.039134042 | 85.6491596  |
| COL15A1  | 10.85463117 | 10.47485168 | 0.033959411 | 10.85463117 | 7.035285227 | 1.66E-13    | COLLAGENS          | 1.036256312 | 1.542884306 |
| COL15A1  | 10.85463117 | 10.47485168 | 0.033959411 | 10.85463117 | 7.035285227 | 1.66E-13    | BASEMENT_MEMBRANES | 1.036256312 | 1.542884306 |
| COL17A1  | 10.92392403 | 7.826266738 | 6.43E-20    | 10.92392403 | 3.388855682 | 0.012760561 | COLLAGENS          | 1.395802672 | 3.223484578 |
| COL1A1   | 15.55602792 | 14.72309046 | 0.00078358  | 15.55602792 | 5.928756818 | 1.29E-135   | COLLAGENS          | 1.056573548 | 2.623826276 |
| COL1A2   | 15.54163117 | 14.47520346 | 6.84E-07    | 15.54163117 | 7.728581818 | 1.89E-42    | COLLAGENS          | 1.073672726 | 2.010929241 |
| COL21A1  | 7.019368831 | 6.14213844  | 1.15E-06    | 7.019368831 | 5.823370455 | 5.76E-111   | COLLAGENS          | 1.142821657 | 1.205379065 |
| COL25A1  | 4.638569481 | 3.886852269 | 9.66E-05    | 4.638569481 | 3.960978409 | 2.96E-42    | COLLAGENS          | 1.193399995 | 1.17106659  |
| COL3A1   | 14.95189286 | 14.25650017 | 0.00347231  | 14.95189286 | 4.069794318 | 1.91E-05    | COLLAGENS          | 1.048777237 | 3.673869412 |
| COL4A1   | 13.79657662 | 13.18191152 | 6.57E-05    | 13.79657662 | 8.029746591 | 2.51E-34    | COLLAGENS          | 1.046629437 | 1.718183316 |
| COL4A1   | 13.79657662 | 13.18191152 | 6.57E-05    | 13.79657662 | 8.029746591 | 2.51E-34    | BASEMENT_MEMBRANES | 1.046629437 | 1.718183316 |
| COL4A2   | 14.20705195 | 13.44157649 | 2.50E-07    | 14.20705195 | 5.313918182 | 0.038483001 | BASEMENT_MEMBRANES | 1.056948339 | 2.673554892 |
| COL4A2   | 14.20705195 | 13.44157649 | 2.50E-07    | 14.20705195 | 5.313918182 | 0.038483001 | COLLAGENS          | 1.056948339 | 2.673554892 |
| COL4A5   | 9.769585065 | 9.278673773 | 0.010480589 | 9.769585065 | 6.1588875   | 6.11E-11    | COLLAGENS          | 1.052907485 | 1.586258081 |
| COL4A5   | 9.769585065 | 9.278673773 | 0.010480589 | 9.769585065 | 6.1588875   | 6.11E-11    | BASEMENT_MEMBRANES | 1.052907485 | 1.586258081 |
| COL4A6   | 8.706823377 | 6.14074324  | 1.57E-25    | 8.706823377 | 4.933819318 | 2.50E-27    | BASEMENT_MEMBRANES | 1.417877777 | 1.764722787 |
| COL4A6   | 8.706823377 | 6.14074324  | 1.57E-25    | 8.706823377 | 4.933819318 | 2.50E-27    | COLLAGENS          | 1.417877777 | 1.764722787 |
| COL5A3   | 9.952461039 | 9.44224444  | 0.000677925 | 9.952461039 | 5.696418182 | 1.12E-07    | COLLAGENS          | 1.054035521 | 1.747143682 |
| COL6A2   | 14.32705909 | 13.26632556 | 1.55E-10    | 14.32705909 | 11.82396818 | 2.30E-125   | COLLAGENS          | 1.079956845 | 1.21169635  |
| COL6A2   | 14.32705909 | 13.26632556 | 1.55E-10    | 14.32705909 | 11.82396818 | 2.30E-125   | BASEMENT_MEMBRANES | 1.079956845 | 1.21169635  |
| COL6A3   | 13.28428247 | 12.61874339 | 0.002642124 | 13.28428247 | 12.88514318 | 4.74E-74    | BASEMENT_MEMBRANES | 1.052742104 | 1.030976706 |
| COL6A3   | 13.28428247 | 12.61874339 | 0.002642124 | 13.28428247 | 12.88514318 | 4.74E-74    | COLLAGENS          | 1.052742104 | 1.030976706 |
| COMP     | 8.168780519 | 7.219158037 | 0.002025102 | 8.168780519 | 8.0084125   | 1.24E-113   | ECM_GLYCOPROTEINS  | 1.131541999 | 1.020024945 |
| CPAMD8   | 8.765424675 | 7.626237433 | 1.81E-09    | 8.765424675 | 3.203618182 | 9.88E-116   | ECM_REGULATORS     | 1.149377364 | 2.736101551 |
| CRELD2   | 10.55531429 | 10.39180375 | 0.015376245 | 10.55531429 | 0.708672727 | 8.59E-09    | ECM_GLYCOPROTEINS  | 1.015734567 | 14.89448356 |
| CRISPLD1 | 9.315064935 | 8.097706832 | 7.13E-11    | 9.315064935 | 6.08975     | 0.020098427 | ECM_GLYCOPROTEINS  | 1.150333684 | 1.529630106 |
| CRLF1    | 9.099877922 | 7.059624756 | 9.68E-32    | 9.099877922 | 6.768884091 | 2.74E-69    | SECRETED_FACTORS   | 1.289003061 | 1.344368998 |
| CSF2     | 2.905978571 | 2.068880074 | 3.33E-06    | 2.905978571 | 0.905110227 | 1.73E-19    | SECRETED_FACTORS   | 1.404614317 | 3.210634997 |
| CSH1     | 3.801808442 | 0.184485919 | 0           | 3.801808442 | 0.2683125   | 4.55E-65    | SECRETED_FACTORS   | 20.60758059 | 14.16933032 |
| CST7     | 8.23276039  | 7.014861792 | 2.81E-14    | 8.23276039  | 5.448784091 | 7.55E-89    | ECM_REGULATORS     | 1.173616906 | 1.51093533  |
| CST9L    | 1.132381818 | 0.272094774 | 2.55E-29    | 1.132381818 | 0.871779545 | 3.02E-275   | ECM_REGULATORS     | 4.161718365 | 1.298931392 |
| CTHRC1   | 9.485818182 | 9.070787506 | 0.044383233 | 9.485818182 | 7.952111364 | 2.02E-98    | ECM_GLYCOPROTEINS  | 1.045754646 | 1.192867875 |
| CTSC     | 12.69650065 | 12.15492012 | 1.23E-05    | 12.69650065 | 9.98955     | 5.08E-117   | ECM_REGULATORS     | 1.044556486 | 1.270978237 |
| CTSL     | 12.64565844 | 11.86333242 | 9.53E-15    | 12.64565844 | 0.687885227 | 8.83E-34    | ECM_REGULATORS     | 1.065944879 | 18.38338423 |
| CTSS     | 11.73688571 | 11.41590601 | 0.010865798 | 11.73688571 | 0.254202273 | 5.16E-157   | ECM_REGULATORS     | 1.028116884 | 46.17144288 |
| CXCL13   | 8.162095455 | 6.319954466 | 1.81E-11    | 8.162095455 | 6.927760227 | 5.75E-05    | SECRETED_FACTORS   | 1.291480105 | 1.178172337 |
| CXCL9    | 11.64381364 | 8.922699903 | 7.07E-30    | 11.64381364 | 3.184668182 | 5.85E-10    | SECRETED_FACTORS   | 1.304965287 | 3.656209367 |
| DDX26B   | 8.856307143 | 8.163141895 | 3.36E-11    | 8.856307143 | 1.648797727 | 9.32E-53    | ECM_GLYCOPROTEINS  | 1.084914027 | 5.371372726 |

|                |             |             |             |             |             |           |                    |             |             |
|----------------|-------------|-------------|-------------|-------------|-------------|-----------|--------------------|-------------|-------------|
| <b>EBI3</b>    | 7.230278571 | 6.050194039 | 4.08E-20    | 7.230278571 | 1.269811364 | 5.67E-19  | SECRETED_FACTORS   | 1.195049039 | 5.693978475 |
| <b>EFEMP1</b>  | 11.6112474  | 10.44925799 | 1.77E-09    | 11.6112474  | 7.888103409 | 1.57E-101 | ECM_GLYCOPROTEINS  | 1.111203055 | 1.471994826 |
| <b>EGFL7</b>   | 11.32200909 | 9.73113783  | 1.59E-47    | 11.32200909 | 8.208879545 | 1.48E-42  | SECRETED_FACTORS   | 1.163482553 | 1.379239277 |
| <b>EGFL8</b>   | 8.803781818 | 7.641828307 | 2.72E-26    | 8.803781818 | 7.413967045 | 3.46E-22  | SECRETED_FACTORS   | 1.152051769 | 1.18745899  |
| <b>EGFLAM</b>  | 10.06765455 | 7.591718339 | 7.24E-68    | 10.06765455 | 6.383727273 | 9.38E-08  | ECM_GLYCOPROTEINS  | 1.326136468 | 1.57708093  |
| <b>EGLN2</b>   | 11.93895325 | 11.42198875 | 8.45E-22    | 11.93895325 | 9.702230682 | 1.04E-68  | ECM_REGULATORS     | 1.045260462 | 1.230536939 |
| <b>ELSPBP1</b> | 0.941251299 | 0.46003153  | 1.56E-06    | 0.941251299 | 0.149809091 | 4.71E-69  | ECM_GLYCOPROTEINS  | 2.046058231 | 6.28300521  |
| <b>EMID1</b>   | 8.763759091 | 8.14496787  | 4.54E-05    | 8.763759091 | 8.202040909 | 1.22E-104 | ECM_GLYCOPROTEINS  | 1.075972211 | 1.068485172 |
| <b>F10</b>     | 7.130981169 | 6.183197174 | 5.67E-06    | 7.130981169 | 0.041297727 | 1.06E-56  | ECM_REGULATORS     | 1.153283806 | 172.6724844 |
| <b>F2</b>      | 5.467025974 | 2.072911129 | 5.60E-34    | 5.467025974 | 5.179459091 | 1.32E-08  | ECM_REGULATORS     | 2.637366309 | 1.05552064  |
| <b>FAM20A</b>  | 9.6255      | 8.560326662 | 1.24E-09    | 9.6255      | 5.639498864 | 2.88E-18  | ECM_REGULATORS     | 1.124431389 | 1.706800592 |
| <b>FBLN1</b>   | 13.75817857 | 11.59315023 | 2.79E-29    | 13.75817857 | 5.178522727 | 1.34E-88  | ECM_GLYCOPROTEINS  | 1.18675065  | 2.656776709 |
| <b>FBLN2</b>   | 11.31948182 | 10.23178675 | 1.18E-10    | 11.31948182 | 10.38573636 | 2.27E-42  | ECM_GLYCOPROTEINS  | 1.106305486 | 1.089906524 |
| <b>FBLN5</b>   | 12.06672922 | 9.873761879 | 2.16E-55    | 12.06672922 | 8.263398864 | 3.59E-147 | ECM_GLYCOPROTEINS  | 1.222100489 | 1.460262226 |
| <b>FBN3</b>    | 11.11442727 | 4.14700932  | 1.49E-140   | 11.11442727 | 5.654632955 | 7.67E-48  | ECM_GLYCOPROTEINS  | 2.680106654 | 1.96554354  |
| <b>FCN1</b>    | 8.661434416 | 6.368586596 | 7.00E-38    | 8.661434416 | 4.508817045 | 3.15E-27  | ECM_AFFILIATED     | 1.360024596 | 1.920999306 |
| <b>FGF11</b>   | 8.47735974  | 7.665485048 | 5.41E-06    | 8.47735974  | 0.404869318 | 2.66E-22  | SECRETED_FACTORS   | 1.105913023 | 20.9385087  |
| <b>FGF13</b>   | 10.00445195 | 7.236045505 | 4.79E-54    | 10.00445195 | 2.916180682 | 1.27E-17  | SECRETED_FACTORS   | 1.382585549 | 3.43066944  |
| <b>FGF16</b>   | 3.343573377 | 1.048529498 | 1.43E-74    | 3.343573377 | 2.116503409 | 1.39E-133 | SECRETED_FACTORS   | 3.188821472 | 1.579762812 |
| <b>FGF17</b>   | 6.759304545 | 3.066458337 | 4.00E-97    | 6.759304545 | 3.023728409 | 1.48E-12  | SECRETED_FACTORS   | 2.204270791 | 2.235420524 |
| <b>FGF19</b>   | 6.859064935 | 1.779349231 | 1.34E-122   | 6.859064935 | 5.228060227 | 8.57E-44  | SECRETED_FACTORS   | 3.854816591 | 1.311971293 |
| <b>FGF2</b>    | 8.417274675 | 7.807297242 | 0.000282275 | 8.417274675 | 0.318039773 | 8.55E-71  | SECRETED_FACTORS   | 1.078129142 | 26.46610706 |
| <b>FGF3</b>    | 0.865861688 | 0.433148021 | 0.000102411 | 0.865861688 | 0.704777273 | 1.89E-166 | SECRETED_FACTORS   | 1.998997217 | 1.228560741 |
| <b>FGF4</b>    | 5.919713636 | 0.414717188 | 0           | 5.919713636 | 1.228957955 | 6.81E-158 | SECRETED_FACTORS   | 14.27409766 | 4.816856113 |
| <b>FGL2</b>    | 10.14908701 | 9.58491772  | 5.58E-05    | 10.14908701 | 0.014686364 | 1.15E-24  | ECM_GLYCOPROTEINS  | 1.058860108 | 691.0551355 |
| <b>FNDC7</b>   | 2.672161039 | 0.754637675 | 3.07E-91    | 2.672161039 | 0           | 1.58E-39  | ECM_GLYCOPROTEINS  | 3.540985464 | Inf         |
| <b>FRAS1</b>   | 9.750134416 | 8.380423023 | 1.19E-11    | 9.750134416 | 8.400604545 | 4.99E-144 | ECM_GLYCOPROTEINS  | 1.163441796 | 1.160646756 |
| <b>FREM1</b>   | 7.053040909 | 5.985597532 | 1.92E-07    | 7.053040909 | 0.013803409 | 8.08E-162 | ECM_AFFILIATED     | 1.178335308 | 510.9636947 |
| <b>HAPLN1</b>  | 6.638294805 | 5.239506823 | 1.06E-08    | 6.638294805 | 0.216446591 | 1.02E-24  | PROTEOGLYCANS      | 1.266969398 | 30.66943571 |
| <b>HPX</b>     | 6.620682468 | 4.962082464 | 6.50E-11    | 6.620682468 | 4.147871591 | 5.26E-25  | ECM_AFFILIATED     | 1.334254825 | 1.596163797 |
| <b>HTRA4</b>   | 5.40094026  | 3.348438982 | 1.25E-39    | 5.40094026  | 1.250257955 | 3.08E-82  | ECM_REGULATORS     | 1.612972579 | 4.319860746 |
| <b>HYAL2</b>   | 11.65225065 | 11.15445061 | 1.01E-14    | 11.65225065 | 1.068781818 | 3.21E-92  | ECM_REGULATORS     | 1.044627929 | 10.90236609 |
| <b>HYAL4</b>   | 8.815507792 | 1.19545825  | 0           | 8.815507792 | 3.035072727 | 1.91E-05  | ECM_REGULATORS     | 7.374166175 | 2.904545816 |
| <b>IGFBP2</b>  | 12.5405     | 11.54679975 | 1.87E-07    | 12.5405     | 3.308595455 | 6.41E-95  | ECM_GLYCOPROTEINS  | 1.086058499 | 3.790279039 |
| <b>IGSF10</b>  | 6.967480519 | 5.994378825 | 3.00E-06    | 6.967480519 | 6.493828409 | 3.88E-47  | ECM_GLYCOPROTEINS  | 1.162335702 | 1.072938809 |
| <b>ITLN2</b>   | 6.132425325 | 1.964228414 | 7.34E-103   | 6.132425325 | 2.077495455 | 3.82E-86  | ECM_AFFILIATED     | 3.122053057 | 2.951835736 |
| <b>KNG1</b>    | 5.000430519 | 2.176259595 | 2.04E-19    | 5.000430519 | 3.533275    | 8.59E-151 | ECM_REGULATORS     | 2.29771785  | 1.41523955  |
| <b>LAMA4</b>   | 11.47398247 | 10.91165478 | 5.88E-05    | 11.47398247 | 4.796089773 | 4.31E-32  | ECM_GLYCOPROTEINS  | 1.051534593 | 2.392361905 |
| <b>LAMA4</b>   | 11.47398247 | 10.91165478 | 5.88E-05    | 11.47398247 | 4.796089773 | 4.31E-32  | BASEMENT_MEMBRANES | 1.051534593 | 2.392361905 |
| <b>LAMA5</b>   | 12.66366429 | 12.32682005 | 0.003552334 | 12.66366429 | 5.271243182 | 4.66E-86  | ECM_GLYCOPROTEINS  | 1.027326126 | 2.402405628 |
| <b>LAMA5</b>   | 12.66366429 | 12.32682005 | 0.003552334 | 12.66366429 | 5.271243182 | 4.66E-86  | BASEMENT_MEMBRANES | 1.027326126 | 2.402405628 |
| <b>LAMB1</b>   | 12.60562078 | 12.22750926 | 0.004833951 | 12.60562078 | 6.506263636 | 3.64E-82  | BASEMENT_MEMBRANES | 1.03092302  | 1.937459268 |
| <b>LAMB1</b>   | 12.60562078 | 12.22750926 | 0.004833951 | 12.60562078 | 6.506263636 | 3.64E-82  | ECM_GLYCOPROTEINS  | 1.03092302  | 1.937459268 |
| <b>LAMC1</b>   | 13.81678506 | 12.78352298 | 6.02E-22    | 13.81678506 | 1.8319125   | 1.12E-102 | ECM_GLYCOPROTEINS  | 1.080827647 | 7.542273479 |
| <b>LAMC1</b>   | 13.81678506 | 12.78352298 | 6.02E-22    | 13.81678506 | 1.8319125   | 1.12E-102 | BASEMENT_MEMBRANES | 1.080827647 | 7.542273479 |
| <b>LAMC3</b>   | 10.27522338 | 7.751949405 | 1.30E-51    | 10.27522338 | 5.444       | 1.33E-26  | BASEMENT_MEMBRANES | 1.325501863 | 1.887444003 |

|         |             |             |             |             |             |             |                    |             |             |
|---------|-------------|-------------|-------------|-------------|-------------|-------------|--------------------|-------------|-------------|
| LAMC3   | 10.27522338 | 7.751949405 | 1.30E-51    | 10.27522338 | 5.444       | 1.33E-26    | ECM_GLYCOPROTEINS  | 1.325501863 | 1.887440003 |
| LGALS12 | 4.050072078 | 3.118714613 | 9.41E-07    | 4.050072078 | 0.125365909 | 1.86E-66    | ECM_AFFILIATED     | 1.29863504  | 32.30600813 |
| LGALS16 | 1.215059091 | 0.026903571 | 0           | 1.215059091 | 0.795284091 | 1.94E-118   | ECM_AFFILIATED     | 45.1634873  | 1.527830249 |
| LGALS7  | 3.47269026  | 2.673128898 | 0.002431626 | 3.47269026  | 1.140015909 | 2.69E-64    | ECM_AFFILIATED     | 1.299110665 | 3.046177016 |
| LOXL1   | 9.994736364 | 9.223631424 | 1.37E-06    | 9.994736364 | 9.193948864 | 2.71E-171   | ECM_REGULATORS     | 1.083601014 | 1.087099408 |
| LOXL2   | 12.41042857 | 10.13705281 | 2.10E-58    | 12.41042857 | 1.558902273 | 8.71E-180   | ECM_REGULATORS     | 1.224263975 | 7.961004861 |
| LTBP4   | 12.09105779 | 11.5508213  | 1.07E-05    | 12.09105779 | 1.134201136 | 1.22E-55    | ECM_GLYCOPROTEINS  | 1.046770396 | 10.66041763 |
| MATN3   | 7.07896039  | 6.479670986 | 0.000897942 | 7.07896039  | 6.243238636 | 1.37E-126   | ECM_GLYCOPROTEINS  | 1.092487629 | 1.133860293 |
| MFAP1   | 10.82840519 | 10.3685813  | 2.44E-29    | 10.82840519 | 2.215597727 | 5.97E-122   | ECM_GLYCOPROTEINS  | 1.044347812 | 4.887351644 |
| MFAP2   | 11.00239416 | 9.09298169  | 3.80E-18    | 11.00239416 | 1.199613636 | 1.33E-68    | ECM_GLYCOPROTEINS  | 1.209987497 | 9.171614779 |
| MFAP5   | 7.930794805 | 6.773161405 | 1.93E-05    | 7.930794805 | 7.282652273 | 4.38E-67    | ECM_GLYCOPROTEINS  | 1.170914781 | 1.088998144 |
| MMP15   | 13.1271013  | 10.75676714 | 1.66E-83    | 13.1271013  | 4.612923864 | 1.26E-113   | ECM_REGULATORS     | 1.220357485 | 2.845722515 |
| MMP16   | 7.66576039  | 6.831207403 | 7.81E-05    | 7.66576039  | 0.242132955 | 5.48E-79    | ECM_REGULATORS     | 1.122167713 | 31.65930224 |
| MMP2    | 13.48239091 | 12.25474887 | 5.92E-14    | 13.48239091 | 11.88949318 | 6.34E-175   | ECM_REGULATORS     | 1.100176842 | 1.133975242 |
| MMP23B  | 6.814503247 | 5.812182203 | 4.65E-12    | 6.814503247 | 2.105089773 | 1.22E-22    | ECM_REGULATORS     | 1.172451759 | 3.237155648 |
| MMP24   | 10.41815325 | 6.904890448 | 3.41E-72    | 10.41815325 | 0.241529545 | 7.32E-128   | ECM_REGULATORS     | 1.508807899 | 43.13407383 |
| MMP9    | 12.71395909 | 9.321476019 | 8.67E-50    | 12.71395909 | 10.95604773 | 5.54E-11    | ECM_REGULATORS     | 1.363942692 | 1.160451233 |
| MUC12   | 5.687809091 | 4.995281138 | 0.005228636 | 5.687809091 | 3.365229545 | 2.32E-94    | ECM_AFFILIATED     | 1.138636432 | 1.690169724 |
| MUC16   | 6.727663636 | 5.291437598 | 3.29E-05    | 6.727663636 | 3.793965909 | 4.68E-37    | ECM_AFFILIATED     | 1.271424544 | 1.773253581 |
| MUC3A   | 8.727307792 | 6.431331046 | 8.43E-16    | 8.727307792 | 0.487304545 | 1.73E-78    | ECM_AFFILIATED     | 1.356998688 | 17.90935027 |
| MUC4    | 8.680755195 | 6.699345553 | 2.24E-10    | 8.680755195 | 6.610771591 | 8.08E-25    | ECM_AFFILIATED     | 1.295761672 | 1.313122844 |
| NCAN    | 6.512582468 | 2.406321746 | 3.62E-47    | 6.512582468 | 5.494847727 | 1.96E-168   | PROTEOGLYCANS      | 2.706447082 | 1.185216186 |
| NELL1   | 5.282794805 | 3.299447847 | 5.43E-14    | 5.282794805 | 0.758869318 | 7.33E-38    | ECM_GLYCOPROTEINS  | 1.601114808 | 6.961402548 |
| NGLY1   | 10.1256513  | 9.970886625 | 0.001045832 | 10.1256513  | 7.918786364 | 2.20E-37    | ECM_REGULATORS     | 1.015521656 | 1.278687268 |
| NID2    | 9.877287013 | 9.197347518 | 1.53E-05    | 9.877287013 | 7.775701136 | 2.82E-51    | BASEMENT_MEMBRANES | 1.073927781 | 1.270276061 |
| NID2    | 9.877287013 | 9.197347518 | 1.53E-05    | 9.877287013 | 7.775701136 | 2.82E-51    | ECM_GLYCOPROTEINS  | 1.073927781 | 1.270276061 |
| NTNG1   | 7.672241558 | 4.252056566 | 4.56E-45    | 7.672241558 | 2.505509091 | 1.09E-118   | ECM_GLYCOPROTEINS  | 1.804360182 | 3.062148761 |
| NTNG1   | 7.672241558 | 4.252056566 | 4.56E-45    | 7.672241558 | 2.505509091 | 1.09E-118   | BASEMENT_MEMBRANES | 1.804360182 | 3.062148761 |
| OGFOD1  | 10.80253701 | 10.46312039 | 3.58E-17    | 10.80253701 | 2.750610227 | 6.56E-44    | ECM_REGULATORS     | 1.032439331 | 3.927323801 |
| OIT3    | 4.305724675 | 3.287965518 | 8.75E-08    | 4.305724675 | 0.97745     | 2.02E-27    | ECM_GLYCOPROTEINS  | 1.309540703 | 4.40505875  |
| PCOLCE  | 11.30457013 | 10.57789727 | 5.37E-07    | 11.30457013 | 0.029690909 | 7.99E-06    | ECM_GLYCOPROTEINS  | 1.068697288 | 380.7417986 |
| PCOLCE2 | 8.764474675 | 6.526141798 | 1.45E-25    | 8.764474675 | 2.041115909 | 9.88E-67    | ECM_GLYCOPROTEINS  | 1.342979504 | 4.293962257 |
| PCSK5   | 10.40851364 | 8.323331966 | 1.02E-50    | 10.40851364 | 4.949498864 | 4.07E-87    | ECM_REGULATORS     | 1.250522469 | 2.102942929 |
| PLOD1   | 13.32065325 | 12.5094691  | 6.61E-25    | 13.32065325 | 11.82298409 | 5.28E-83    | ECM_REGULATORS     | 1.064845609 | 1.126674378 |
| PLXNA1  | 11.9026974  | 11.51487167 | 0.000179702 | 11.9026974  | 5.021021591 | 7.01E-60    | ECM_AFFILIATED     | 1.033680421 | 2.370572838 |
| PLXNA2  | 10.8827974  | 10.52951998 | 0.000793112 | 10.8827974  | 3.247742045 | 6.37E-19    | ECM_AFFILIATED     | 1.033551142 | 3.350881089 |
| POMZP3  | 9.193207143 | 8.767994484 | 2.07E-08    | 9.193207143 | 1.451835227 | 1.46E-153   | ECM_GLYCOPROTEINS  | 1.048496    | 6.332128447 |
| PXDN    | 12.77679805 | 11.24386177 | 1.85E-25    | 12.77679805 | 0.502647727 | 4.36E-133   | ECM_GLYCOPROTEINS  | 1.13633539  | 25.41899099 |
| PXDNL   | 6.034985714 | 4.509557428 | 2.09E-20    | 6.034985714 | 2.552178409 | 3.09E-26    | ECM_GLYCOPROTEINS  | 1.338265631 | 2.364641003 |
| RELN    | 7.042130519 | 5.782373909 | 1.90E-07    | 7.042130519 | 0.370898864 | 1.57E-11    | ECM_GLYCOPROTEINS  | 1.217861493 | 18.98665973 |
| RSPO1   | 4.11025974  | 3.350703639 | 0.000678619 | 4.11025974  | 1.812540909 | 1.57E-56    | ECM_GLYCOPROTEINS  | 1.226685551 | 2.267678329 |
| RSPO2   | 3.894609091 | 2.661749598 | 2.49E-08    | 3.894609091 | 2.923955682 | 0.006760204 | ECM_GLYCOPROTEINS  | 1.463176361 | 1.331965842 |
| RSPO3   | 7.631338961 | 5.728923168 | 1.33E-20    | 7.631338961 | 7.129190909 | 0.032197485 | ECM_GLYCOPROTEINS  | 1.332072143 | 1.07043549  |
| RSPO4   | 6.305003247 | 4.166017265 | 6.69E-22    | 6.305003247 | 1.403763636 | 1.43E-68    | ECM_GLYCOPROTEINS  | 1.513436658 | 4.491499198 |
| SDC2    | 11.69209156 | 11.10406254 | 0.000314522 | 11.69209156 | 9.546525    | 5.15E-18    | ECM_AFFILIATED     | 1.052956206 | 1.224748436 |
| SEMA4A  | 10.55910909 | 9.711148921 | 1.39E-10    | 10.55910909 | 5.029613636 | 4.93E-48    | ECM_AFFILIATED     | 1.087318213 | 2.099387717 |

|          |             |             |             |             |             |             |                   |             |             |
|----------|-------------|-------------|-------------|-------------|-------------|-------------|-------------------|-------------|-------------|
| SEMA4C   | 12.31272922 | 10.75931697 | 5.13E-97    | 12.31272922 | 7.172706818 | 0.014044704 | ECM_AFFILIATED    | 1.144378333 | 1.716608462 |
| SEMA4D   | 11.41986688 | 10.42381143 | 1.10E-27    | 11.41986688 | 1.698551136 | 4.82E-102   | ECM_AFFILIATED    | 1.095555782 | 6.723298839 |
| SEMA4F   | 8.99652987  | 8.665903223 | 6.87E-05    | 8.99652987  | 8.810028409 | 1.23E-161   | ECM_AFFILIATED    | 1.038152589 | 1.021169224 |
| SEMA4G   | 8.994888961 | 8.492883635 | 0.001383029 | 8.994888961 | 3.130627273 | 9.88E-135   | ECM_AFFILIATED    | 1.059108937 | 2.873190635 |
| SEMA5B   | 7.800862987 | 6.877054166 | 1.78E-06    | 7.800862987 | 1.245409091 | 1.38E-54    | ECM_AFFILIATED    | 1.134332055 | 6.263695234 |
| SEMA7A   | 10.02117143 | 8.460495403 | 5.07E-31    | 10.02117143 | 7.163461364 | 3.47E-58    | ECM_AFFILIATED    | 1.18446627  | 1.398928663 |
| SERPINA5 | 9.115425974 | 6.423066418 | 1.01E-17    | 9.115425974 | 0.026001136 | 3.74E-13    | ECM_REGULATORS    | 1.419170437 | 350.5779842 |
| SERPINB9 | 11.366      | 9.237187564 | 1.99E-88    | 11.366      | 6.230551136 | 3.88E-06    | ECM_REGULATORS    | 1.230461103 | 1.824236693 |
| SERPINE2 | 11.56234351 | 10.72869835 | 1.05E-05    | 11.56234351 | 8.017265909 | 6.50E-108   | ECM_REGULATORS    | 1.077702358 | 1.442180369 |
| SERPINH1 | 14.13176494 | 12.67646775 | 9.69E-39    | 14.13176494 | 5.440107955 | 1.07E-122   | ECM_REGULATORS    | 1.114803052 | 2.597699357 |
| SLIT1    | 7.076403896 | 5.41022524  | 4.80E-12    | 7.076403896 | 1.756978409 | 4.17E-31    | ECM_GLYCOPROTEINS | 1.307968445 | 4.027598666 |
| SMOC1    | 8.250266234 | 6.990809262 | 4.70E-06    | 8.250266234 | 0.795704545 | 1.16E-14    | ECM_GLYCOPROTEINS | 1.180158967 | 10.36850459 |
| SPAM1    | 2.753737662 | 0.152275283 | 0           | 2.753737662 | 2.439968182 | 9.54E-57    | ECM_REGULATORS    | 18.08394381 | 1.128595726 |
| SPOCK2   | 11.09782597 | 10.66480901 | 0.012711783 | 11.09782597 | 0.104305682 | 1.37E-45    | PROTEOGLYCANS     | 1.040602412 | 106.3971375 |
| SVEP1    | 9.567695455 | 8.193189306 | 1.06E-15    | 9.567695455 | 7.204344318 | 1.11E-37    | ECM_GLYCOPROTEINS | 1.16776204  | 1.328045278 |
| TECTB    | 1.718621429 | 0.884186867 | 2.42E-12    | 1.718621429 | 1.395998864 | 2.53E-93    | ECM_GLYCOPROTEINS | 1.943731005 | 1.231105177 |
| THBS4    | 9.164805844 | 7.914888977 | 3.80E-08    | 9.164805844 | 4.319764773 | 3.31E-09    | ECM_GLYCOPROTEINS | 1.157919697 | 2.121598357 |
| TLL2     | 7.246832468 | 4.877072312 | 3.08E-59    | 7.246832468 | 7.080390909 | 1.82E-06    | ECM_REGULATORS    | 1.485898097 | 1.023507397 |
| TSPEAR   | 5.686031818 | 2.603217952 | 5.58E-72    | 5.686031818 | 0.246639773 | 2.77E-34    | ECM_GLYCOPROTEINS | 2.184231948 | 23.05399391 |
| WFIKKN2  | 4.037857792 | 2.365066883 | 3.99E-24    | 4.037857792 | 1.607265909 | 1.18E-171   | SECRETED_FACTORS  | 1.707291164 | 2.512252496 |
| WNT1     | 1.516121429 | 0.68634775  | 4.57E-26    | 1.516121429 | 1.228228409 | 1.45E-170   | SECRETED_FACTORS  | 2.208969766 | 1.234396972 |
| WNT11    | 6.864704545 | 5.99647208  | 9.52E-06    | 6.864704545 | 2.8379625   | 1.45E-36    | SECRETED_FACTORS  | 1.144790546 | 2.418884867 |
| WNT2B    | 10.22443766 | 7.538313742 | 2.02E-87    | 10.22443766 | 9.662820455 | 8.13E-63    | SECRETED_FACTORS  | 1.356329547 | 1.058121457 |
| WNT3     | 10.65651558 | 6.938683499 | 7.24E-166   | 10.65651558 | 0.864421591 | 1.37E-07    | SECRETED_FACTORS  | 1.535812317 | 12.32791464 |
| WNT6     | 5.314022078 | 3.820398635 | 8.63E-18    | 5.314022078 | 3.036595455 | 6.91E-43    | SECRETED_FACTORS  | 1.390960103 | 1.749993424 |
| WNT8A    | 4.022231818 | 0.2552979   | 0           | 4.022231818 | 1.177968182 | 9.25E-64    | SECRETED_FACTORS  | 15.75505251 | 3.414550478 |
| WNT9A    | 8.621424675 | 6.912866351 | 1.86E-22    | 8.621424675 | 1.376176136 | 2.30E-51    | SECRETED_FACTORS  | 1.247156279 | 6.26476833  |
| VTN      | 7.441898052 | 5.264000174 | 4.70E-14    | 7.441898052 | 5.340589773 | 3.58E-06    | ECM_GLYCOPROTEINS | 1.413734386 | 1.393459968 |
| VWA5B2   | 6.378844805 | 4.469438401 | 6.34E-21    | 6.378844805 | 3.707904545 | 1.86E-12    | ECM_GLYCOPROTEINS | 1.427213943 | 1.720336844 |
| VWA9     | 10.71350325 | 10.62326302 | 0.015060945 | 10.71350325 | 0           | 4.24E-23    | ECM_GLYCOPROTEINS | 1.008494586 | Inf         |
| VWDE     | 5.568891558 | 4.248050131 | 9.51E-09    | 5.568891558 | 0.554190909 | 2.81E-22    | ECM_GLYCOPROTEINS | 1.31092887  | 10.04868804 |
| VWF      | 12.77471104 | 12.19835603 | 3.98E-06    | 12.77471104 | 0.1099125   | 1.99E-107   | ECM_GLYCOPROTEINS | 1.04724858  | 116.2261894 |
| XCL2     | 5.398020779 | 3.46297297  | 5.37E-38    | 5.398020779 | 0.949342045 | 5.81E-29    | SECRETED_FACTORS  | 1.558782245 | 5.686065212 |
| ZP4      | 0.952246104 | 0.354173628 | 1.24E-12    | 0.952246104 | 0.320561364 | 2.82E-50    | ECM_GLYCOPROTEINS | 2.688642034 | 2.97055794  |



**Thyroid Carcinoma (THCA)**

| Signature genes | Expression in tumor | Expression in rest of Pan-Cancer | P-value     | Expression in tumor | Expression in normal tissue | P-value     | Matrisome category | Fold change vs. Pan-Cancer | Fold change vs. normal |
|-----------------|---------------------|----------------------------------|-------------|---------------------|-----------------------------|-------------|--------------------|----------------------------|------------------------|
| ADAMTS10        | 7.94207373          | 7.647687142                      | 7.26E-06    | 7.94207373          | 7.292179661                 | 2.03E-08    | ECM_REGULATORS     | 1.038493545                | 1.089122059            |
| ADAMTS18        | 4.627740806         | 3.805770956                      | 1.58E-16    | 4.627740806         | 2.993918644                 | 4.00E-12    | ECM_REGULATORS     | 1.215979852                | 1.545713613            |
| ADAMTS9         | 10.58527356         | 8.920219221                      | 9.30E-104   | 10.58527356         | 8.627013559                 | 1.50E-21    | ECM_REGULATORS     | 1.186660697                | 1.226991645            |
| ADAMTSL2        | 9.23889282          | 8.130247237                      | 6.65E-51    | 9.23889282          | 8.764137288                 | 0.000348856 | ECM_REGULATORS     | 1.136360624                | 1.054170253            |
| AGRN            | 13.90995289         | 13.26102169                      | 3.25E-31    | 13.90995289         | 13.01676949                 | 7.37E-25    | BASEMENT_MEMBRANES | 1.048935234                | 1.068617901            |
| AGRN            | 13.90995289         | 13.26102169                      | 3.25E-31    | 13.90995289         | 13.01676949                 | 7.37E-25    | ECM_GLYCOPROTEINS  | 1.048935234                | 1.068617901            |
| ANGPT2          | 8.726709632         | 8.569085831                      | 0.02065568  | 8.726709632         | 8.275672881                 | 0.000635881 | SECRETED_FACTORS   | 1.018394471                | 1.05450152             |
| ANGPTL4         | 10.23180981         | 9.264555022                      | 6.60E-21    | 10.23180981         | 9.310684746                 | 3.88E-07    | SECRETED_FACTORS   | 1.104403804                | 1.098932043            |
| ANXA1           | 14.84928196         | 12.46585992                      | 1.44E-163   | 14.84928196         | 13.61248475                 | 9.41E-12    | ECM_AFFILIATED     | 1.191195959                | 1.090857565            |
| ANXA5           | 13.76640333         | 13.36005709                      | 5.50E-20    | 13.76640333         | 13.47913051                 | 3.21E-07    | ECM_AFFILIATED     | 1.030415008                | 1.021312415            |
| BMP1            | 11.40903748         | 10.5945713                       | 1.23E-66    | 11.40903748         | 10.22187797                 | 6.12E-31    | ECM_REGULATORS     | 1.076875803                | 1.116139081            |
| BRINP2          | 4.537763398         | 3.054232069                      | 1.32E-26    | 4.537763398         | 2.061559322                 | 1.32E-13    | SECRETED_FACTORS   | 1.485729733                | 2.201131614            |
| BTC             | 8.721982312         | 6.33524282                       | 7.48E-127   | 8.721982312         | 8.51199322                  | 0.010564049 | SECRETED_FACTORS   | 1.376740018                | 1.024669791            |
| C17orf58        | 8.887916462         | 8.754446864                      | 0.000529672 | 8.887916462         | 8.638189831                 | 5.18E-07    | ECM_REGULATORS     | 1.01524592                 | 1.028909602            |
| C1QL2           | 3.474726445         | 1.509790369                      | 4.34E-87    | 3.474726445         | 2.686062712                 | 0.029043844 | ECM_AFFILIATED     | 2.301462849                | 1.293613299            |
| C1QL4           | 6.383875131         | 3.428420754                      | 1.46E-137   | 6.383875131         | 5.589967797                 | 0.000437004 | ECM_AFFILIATED     | 1.862045411                | 1.142023597            |
| CBLN1           | 7.631945009         | 3.791499889                      | 1.13E-251   | 7.631945009         | 5.57979322                  | 4.55E-10    | SECRETED_FACTORS   | 2.0129092                  | 1.367782767            |
| CBLN4           | 5.488711909         | 3.231295835                      | 1.20E-93    | 5.488711909         | 4.010559322                 | 4.25E-08    | SECRETED_FACTORS   | 1.698610152                | 1.368565197            |
| CCL13           | 5.636687916         | 4.421987354                      | 1.51E-26    | 5.636687916         | 3.876461017                 | 6.47E-08    | SECRETED_FACTORS   | 1.274695621                | 1.454080898            |
| CCL17           | 4.868334501         | 3.564475323                      | 6.70E-48    | 4.868334501         | 3.157930508                 | 1.38E-06    | SECRETED_FACTORS   | 1.365792735                | 1.541621796            |
| CCL18           | 8.113516112         | 7.02659162                       | 3.98E-14    | 8.113516112         | 7.059054237                 | 0.004483402 | SECRETED_FACTORS   | 1.154687301                | 1.149377217            |
| CILP2           | 7.857487741         | 6.250372045                      | 2.51E-49    | 7.857487741         | 7.453645763                 | 0.005172667 | ECM_GLYCOPROTEINS  | 1.257123205                | 1.054180463            |
| CLCF1           | 8.822992995         | 7.649952713                      | 1.96E-53    | 8.822992995         | 8.445545763                 | 0.011664945 | SECRETED_FACTORS   | 1.153339547                | 1.04469187             |
| CLEC14A         | 10.28760648         | 8.945370674                      | 1.02E-103   | 10.28760648         | 9.479788136                 | 2.11E-13    | ECM_AFFILIATED     | 1.150048092                | 1.08521481             |
| CLEC5A          | 6.740581436         | 6.193457221                      | 5.91E-09    | 6.740581436         | 5.995201695                 | 0.000626978 | ECM_AFFILIATED     | 1.088339064                | 1.124329385            |
| COL13A1         | 8.257457793         | 6.271441055                      | 1.40E-137   | 8.257457793         | 5.498889831                 | 2.76E-33    | COLLAGENS          | 1.316676298                | 1.501659071            |
| COL15A1         | 11.12306182         | 10.44342349                      | 7.71E-13    | 11.12306182         | 10.46128136                 | 3.62E-07    | BASEMENT_MEMBRANES | 1.065078117                | 1.063259982            |
| COL15A1         | 11.12306182         | 10.44342349                      | 7.71E-13    | 11.12306182         | 10.46128136                 | 3.62E-07    | COLLAGENS          | 1.065078117                | 1.063259982            |
| COL19A1         | 3.904593695         | 2.498159056                      | 1.93E-46    | 3.904593695         | 2.236208475                 | 2.44E-07    | COLLAGENS          | 1.562988428                | 1.746077676            |
| COL21A1         | 6.928415412         | 6.110485488                      | 1.08E-17    | 6.928415412         | 6.423055932                 | 0.002882797 | COLLAGENS          | 1.133856782                | 1.078678978            |
| COL8A1          | 13.05528459         | 9.603310458                      | 1.50E-208   | 13.05528459         | 11.85196271                 | 5.17E-17    | COLLAGENS          | 1.359456684                | 1.101529334            |
| COL8A2          | 11.2203718          | 8.781896622                      | 9.95E-166   | 11.2203718          | 10.21841864                 | 1.31E-05    | COLLAGENS          | 1.277670677                | 1.098053642            |
| COMP            | 8.388894571         | 7.166548346                      | 6.26E-14    | 8.388894571         | 5.376869492                 | 8.30E-13    | ECM_GLYCOPROTEINS  | 1.170562754                | 1.560181921            |
| CRLF1           | 9.517294571         | 6.949789088                      | 8.60E-176   | 9.517294571         | 7.395266102                 | 1.14E-08    | SECRETED_FACTORS   | 1.369436461                | 1.286944167            |
| CSF2            | 3.803716462         | 1.981982291                      | 1.53E-82    | 3.803716462         | 0.647801695                 | 8.10E-23    | SECRETED_FACTORS   | 1.919147552                | 5.871729716            |
| CST2            | 4.164488792         | 3.573344635                      | 1.21E-06    | 4.164488792         | 0.932377966                 | 1.13E-14    | ECM_REGULATORS     | 1.16543161                 | 4.466524246            |
| CST5            | 3.207081611         | 1.559503187                      | 5.18E-65    | 3.207081611         | 0.418108475                 | 1.07E-16    | ECM_REGULATORS     | 2.056476472                | 7.670453498            |
| CST6            | 10.27843923         | 4.678879942                      | 0           | 10.27843923         | 8.280054237                 | 1.16E-07    | ECM_REGULATORS     | 2.19677345                 | 1.241349264            |
| CTSB            | 18.1948993          | 15.06274782                      | 0           | 18.1948993          | 17.32132712                 | 6.42E-14    | ECM_REGULATORS     | 1.207940245                | 1.050433329            |
| CTSC            | 12.69760438         | 12.13208134                      | 6.55E-18    | 12.69760438         | 11.24594746                 | 3.29E-15    | ECM_REGULATORS     | 1.046613851                | 1.12908267             |
| CTSH            | 13.09107671         | 12.08135141                      | 5.22E-63    | 13.09107671         | 11.19838644                 | 6.78E-21    | ECM_REGULATORS     | 1.083577181                | 1.169014552            |

|         |             |             |             |             |             |             |                    |             |             |
|---------|-------------|-------------|-------------|-------------|-------------|-------------|--------------------|-------------|-------------|
| CTSS    | 11.77595587 | 11.40015797 | 1.82E-08    | 11.77595587 | 10.69974068 | 1.75E-11    | ECM_REGULATORS     | 1.032964271 | 1.100583296 |
| CX3CL1  | 11.68674781 | 10.6105555  | 4.48E-33    | 11.68674781 | 10.5807661  | 1.33E-21    | SECRETED_FACTORS   | 1.101426576 | 1.104527564 |
| CXCL14  | 10.45124326 | 9.898353691 | 0.00046876  | 10.45124326 | 9.258169492 | 0.013666581 | SECRETED_FACTORS   | 1.05585672  | 1.128867134 |
| DHH     | 3.998536778 | 3.105733017 | 3.00E-43    | 3.998536778 | 3.636674576 | 0.009547067 | SECRETED_FACTORS   | 1.287469578 | 1.099503597 |
| DMP1    | 1.797028021 | 1.402916095 | 3.84E-09    | 1.797028021 | 0.583476271 | 6.37E-08    | ECM_GLYCOPROTEINS  | 1.280923376 | 3.079864786 |
| EBI3    | 6.46606007  | 6.044574183 | 6.33E-10    | 6.46606007  | 4.865845763 | 3.53E-11    | SECRETED_FACTORS   | 1.069729624 | 1.328866632 |
| ECM1    | 10.22317023 | 10.03369264 | 0.026251335 | 10.22317023 | 7.827081356 | 6.52E-14    | ECM_GLYCOPROTEINS  | 1.018884133 | 1.306128014 |
| EGFL7   | 10.61128424 | 9.705162697 | 1.15E-54    | 10.61128424 | 10.0956     | 1.72E-05    | SECRETED_FACTORS   | 1.0933649   | 1.051080098 |
| EMILIN2 | 10.41825201 | 9.268787848 | 4.33E-71    | 10.41825201 | 9.040023729 | 1.39E-18    | ECM_GLYCOPROTEINS  | 1.124014508 | 1.152458481 |
| EMILIN3 | 5.347065499 | 4.925947338 | 0.000128167 | 5.347065499 | 3.923171186 | 1.19E-08    | ECM_GLYCOPROTEINS  | 1.085489781 | 1.362944731 |
| ESM1    | 8.377387916 | 7.662091529 | 4.33E-11    | 8.377387916 | 6.454432203 | 7.73E-16    | PROTEOGLYCANS      | 1.093355239 | 1.297927943 |
| FAM20A  | 10.70894291 | 8.45314401  | 1.29E-133   | 10.70894291 | 8.812972881 | 6.00E-12    | ECM_REGULATORS     | 1.266859159 | 1.215133991 |
| FAM20C  | 10.81234483 | 10.67142596 | 0.015464432 | 10.81234483 | 10.06893729 | 1.05E-08    | ECM_REGULATORS     | 1.013205253 | 1.073831778 |
| FBN3    | 9.126610158 | 3.96847264  | 2.07E-280   | 9.126610158 | 8.056616949 | 5.14E-06    | ECM_GLYCOPROTEINS  | 2.29977903  | 1.132809244 |
| FCN3    | 6.738771979 | 5.649724334 | 1.27E-30    | 6.738771979 | 5.534820339 | 7.55E-13    | ECM_AFFILIATED     | 1.1927612   | 1.217523165 |
| FGF1    | 8.654111909 | 7.038787152 | 3.11E-49    | 8.654111909 | 7.4468      | 7.34E-19    | SECRETED_FACTORS   | 1.229489076 | 1.162124927 |
| FGF2    | 8.440933975 | 7.78028332  | 1.12E-13    | 8.440933975 | 7.847550847 | 8.61E-06    | SECRETED_FACTORS   | 1.084913444 | 1.075613798 |
| FGF20   | 3.889862522 | 1.770485085 | 3.21E-152   | 3.889862522 | 2.954781356 | 8.79E-06    | SECRETED_FACTORS   | 2.197060317 | 1.316463742 |
| FN1     | 17.00291454 | 15.05863349 | 2.69E-83    | 17.00291454 | 12.95730339 | 6.45E-23    | ECM_GLYCOPROTEINS  | 1.129114042 | 1.312226319 |
| GAS6    | 13.11575306 | 11.65785705 | 3.43E-125   | 13.11575306 | 12.61871695 | 9.76E-09    | ECM_GLYCOPROTEINS  | 1.125056947 | 1.0393888   |
| GLDN    | 6.474608932 | 6.212625777 | 0.005760986 | 6.474608932 | 4.721613559 | 1.30E-06    | ECM_GLYCOPROTEINS  | 1.042169473 | 1.371270404 |
| GPC4    | 10.24726918 | 9.918893596 | 0.000512691 | 10.24726918 | 9.987601695 | 0.0026541   | ECM_AFFILIATED     | 1.033106069 | 1.025998983 |
| HSPG2   | 13.69084273 | 13.35272191 | 1.07E-07    | 13.69084273 | 13.26746102 | 1.06E-05    | PROTEOGLYCANS      | 1.025322239 | 1.031911284 |
| HSPG2   | 13.69084273 | 13.35272191 | 1.07E-07    | 13.69084273 | 13.26746102 | 1.06E-05    | BASEMENT_MEMBRANES | 1.025322239 | 1.031911284 |
| HYAL2   | 11.86111734 | 11.12148919 | 2.31E-106   | 11.86111734 | 11.16034068 | 1.90E-19    | ECM_REGULATORS     | 1.066504416 | 1.062791691 |
| IGFALS  | 6.073010858 | 4.351310266 | 3.48E-58    | 6.073010858 | 5.670486441 | 0.048261151 | ECM_GLYCOPROTEINS  | 1.395674058 | 1.070985871 |
| IGFBP4  | 14.48250438 | 13.39599055 | 7.08E-47    | 14.48250438 | 14.17847966 | 0.001279866 | ECM_GLYCOPROTEINS  | 1.08110739  | 1.021442688 |
| IGFBP6  | 11.40438722 | 8.669294353 | 3.34E-186   | 11.40438722 | 9.949230508 | 3.08E-07    | ECM_GLYCOPROTEINS  | 1.315491983 | 1.146258216 |
| KCP     | 7.204837478 | 5.899193556 | 9.26E-39    | 7.204837478 | 5.181405085 | 1.76E-18    | ECM_GLYCOPROTEINS  | 1.221325832 | 1.390518085 |
| LAMA5   | 12.9925373  | 12.29371693 | 2.57E-30    | 12.9925373  | 12.53715593 | 4.16E-09    | BASEMENT_MEMBRANES | 1.056843701 | 1.036322542 |
| LAMA5   | 12.9925373  | 12.29371693 | 2.57E-30    | 12.9925373  | 12.53715593 | 4.16E-09    | ECM_GLYCOPROTEINS  | 1.056843701 | 1.036322542 |
| LAMB3   | 11.15101961 | 10.80378306 | 0.004821096 | 11.15101961 | 7.82520678  | 6.20E-21    | ECM_GLYCOPROTEINS  | 1.032140275 | 1.425012773 |
| LAMB3   | 11.15101961 | 10.80378306 | 0.004821096 | 11.15101961 | 7.82520678  | 6.20E-21    | BASEMENT_MEMBRANES | 1.032140275 | 1.425012773 |
| LAMC1   | 13.32744431 | 12.76824901 | 8.28E-23    | 13.32744431 | 12.8864661  | 3.26E-10    | ECM_GLYCOPROTEINS  | 1.04379577  | 1.034220259 |
| LAMC1   | 13.32744431 | 12.76824901 | 8.28E-23    | 13.32744431 | 12.8864661  | 3.26E-10    | BASEMENT_MEMBRANES | 1.04379577  | 1.034220259 |
| LAMC2   | 12.66008511 | 9.975507463 | 3.11E-58    | 12.66008511 | 11.73135085 | 1.10E-14    | BASEMENT_MEMBRANES | 1.269116901 | 1.079166865 |
| LAMC2   | 12.66008511 | 9.975507463 | 3.11E-58    | 12.66008511 | 11.73135085 | 1.10E-14    | ECM_GLYCOPROTEINS  | 1.269116901 | 1.079166865 |
| LGALS13 | 0.862830473 | 0.057909036 | 1.03E-243   | 0.862830473 | 0.226916949 | 0.004495667 | ECM_AFFILIATED     | 14.89975544 | 3.802406458 |
| LGALS3  | 12.93674974 | 12.37384743 | 2.09E-14    | 12.93674974 | 11.01799831 | 9.44E-18    | ECM_AFFILIATED     | 1.045491292 | 1.174147007 |
| LTBP3   | 13.75566252 | 12.08049001 | 9.39E-234   | 13.75566252 | 13.4429322  | 0.001531067 | ECM_GLYCOPROTEINS  | 1.138667597 | 1.023263549 |
| MFGE8   | 12.71976305 | 11.72169367 | 1.07E-56    | 12.71976305 | 11.0242     | 1.94E-23    | ECM_GLYCOPROTEINS  | 1.085147199 | 1.153803727 |
| MMP16   | 8.287093695 | 6.760333068 | 1.20E-42    | 8.287093695 | 6.325005085 | 1.70E-13    | ECM_REGULATORS     | 1.225841037 | 1.310211389 |
| MMRN2   | 10.57418144 | 9.674913271 | 1.09E-47    | 10.57418144 | 10.13646102 | 4.98E-06    | ECM_GLYCOPROTEINS  | 1.092948447 | 1.043182766 |
| MUC20   | 9.319869002 | 9.005013927 | 0.005395907 | 9.319869002 | 8.561118644 | 2.07E-06    | ECM_AFFILIATED     | 1.034964418 | 1.088627478 |
| MUC21   | 6.660997198 | 2.328207352 | 1.52E-175   | 6.660997198 | 1.749169492 | 6.14E-22    | ECM_AFFILIATED     | 2.860998267 | 3.808091343 |
| MXRA5   | 12.12006077 | 10.97968525 | 1.50E-25    | 12.12006077 | 11.6121322  | 0.000403392 | ECM_GLYCOPROTEINS  | 1.103862315 | 1.043741197 |

|          |             |             |             |             |             |             |                    |             |             |
|----------|-------------|-------------|-------------|-------------|-------------|-------------|--------------------|-------------|-------------|
| NELL2    | 11.48074711 | 7.631686729 | 1.74E-252   | 11.48074711 | 10.05358814 | 2.91E-06    | ECM_GLYCOPROTEINS  | 1.504352513 | 1.141955186 |
| OIT3     | 5.302952014 | 3.187741398 | 1.23E-99    | 5.302952014 | 2.403528814 | 2.44E-31    | ECM_GLYCOPROTEINS  | 1.663545235 | 2.206319302 |
| P4HA2    | 11.36333363 | 10.66534336 | 7.63E-30    | 11.36333363 | 9.724889831 | 2.89E-39    | ECM_REGULATORS     | 1.065444706 | 1.16847942  |
| P4HTM    | 11.48474991 | 10.2400072  | 9.70E-113   | 11.48474991 | 11.22337966 | 3.53E-06    | ECM_REGULATORS     | 1.12155682  | 1.023288017 |
| PAPLN    | 11.21737338 | 9.088080436 | 7.59E-185   | 11.21737338 | 10.51503051 | 3.07E-06    | ECM_GLYCOPROTEINS  | 1.234295125 | 1.066794183 |
| PAPLN    | 11.21737338 | 9.088080436 | 7.59E-185   | 11.21737338 | 10.51503051 | 3.07E-06    | BASEMENT_MEMBRANES | 1.234295125 | 1.066794183 |
| PAPPA    | 7.111150263 | 6.717022509 | 3.77E-05    | 7.111150263 | 6.617530508 | 0.015921445 | ECM_REGULATORS     | 1.058675961 | 1.074592743 |
| PCSK5    | 9.363401401 | 8.295824738 | 2.17E-47    | 9.363401401 | 9.068545763 | 0.03129846  | ECM_REGULATORS     | 1.12868843  | 1.032514104 |
| PLAU     | 11.38469037 | 10.54549264 | 2.46E-20    | 11.38469037 | 9.066301695 | 3.96E-18    | ECM_REGULATORS     | 1.079578808 | 1.255714927 |
| PLOD2    | 12.9541697  | 11.05678794 | 2.71E-136   | 12.9541697  | 12.77863898 | 0.011054703 | ECM_REGULATORS     | 1.171603342 | 1.013736261 |
| PLXNA2   | 11.29700946 | 10.49081166 | 1.02E-47    | 11.29700946 | 11.0224339  | 0.00210332  | ECM_AFFILIATED     | 1.076847991 | 1.024910611 |
| PLXNA3   | 11.01710315 | 10.72102504 | 3.19E-10    | 11.01710315 | 10.18190508 | 2.37E-19    | ECM_AFFILIATED     | 1.027616586 | 1.082027682 |
| PLXNA4   | 8.834649037 | 6.83596427  | 1.47E-75    | 8.834649037 | 7.467186441 | 3.27E-10    | ECM_AFFILIATED     | 1.292377884 | 1.183129564 |
| PLXNB1   | 12.56708564 | 11.82785667 | 1.82E-45    | 12.56708564 | 12.18867627 | 5.14E-07    | ECM_AFFILIATED     | 1.06249898  | 1.031045977 |
| PLXNB2   | 14.42938441 | 13.64021125 | 3.62E-100   | 14.42938441 | 13.77036949 | 1.13E-14    | ECM_AFFILIATED     | 1.057856374 | 1.047857461 |
| PLXNC1   | 10.6593613  | 9.605555587 | 7.80E-52    | 10.6593613  | 8.853322034 | 1.55E-16    | ECM_AFFILIATED     | 1.109707939 | 1.203995659 |
| PLXND1   | 12.41944623 | 11.83579492 | 1.49E-32    | 12.41944623 | 11.11547119 | 2.86E-35    | ECM_AFFILIATED     | 1.049312389 | 1.11731172  |
| PRSS1    | 4.343289142 | 1.994286507 | 1.05E-67    | 4.343289142 | 0.812313559 | 3.85E-17    | ECM_REGULATORS     | 2.177866183 | 5.346813545 |
| PRSS2    | 5.757888091 | 3.079281333 | 3.46E-66    | 5.757888091 | 1.628315254 | 1.69E-18    | ECM_REGULATORS     | 1.869880491 | 3.536101548 |
| RSP04    | 8.08866725  | 3.97335598  | 2.49E-282   | 8.08866725  | 6.570837288 | 1.82E-07    | ECM_GLYCOPROTEINS  | 2.035726799 | 1.230994909 |
| SDC4     | 14.36031331 | 12.76898026 | 8.59E-105   | 14.36031331 | 12.49631186 | 7.14E-23    | ECM_AFFILIATED     | 1.124624912 | 1.149164127 |
| SEMA3E   | 6.557032925 | 5.122243505 | 1.96E-24    | 6.557032925 | 5.888342373 | 0.016006297 | ECM_AFFILIATED     | 1.280109569 | 1.113561765 |
| SEMA3F   | 11.46077268 | 10.57641549 | 9.89E-30    | 11.46077268 | 10.2562322  | 1.11E-29    | ECM_AFFILIATED     | 1.083615965 | 1.117444735 |
| SERPINA1 | 14.47703713 | 11.7294482  | 2.14E-87    | 14.47703713 | 11.0922322  | 8.99E-21    | ECM_REGULATORS     | 1.234247074 | 1.305150926 |
| SERPINA2 | 0.17968704  | 0.137456101 | 0.031459902 | 0.17968704  | 0           | 0.000317357 | ECM_REGULATORS     | 1.30723219  | Inf         |
| SERPINB8 | 8.889187215 | 8.776352047 | 0.03048604  | 8.889187215 | 8.597933898 | 0.004159338 | ECM_REGULATORS     | 1.012856728 | 1.033874803 |
| SFTA2    | 4.751644133 | 3.044728953 | 1.83E-28    | 4.751644133 | 3.344011864 | 1.55E-08    | ECM_AFFILIATED     | 1.56061318  | 1.420941171 |
| SFTA3    | 12.81639124 | 1.586582745 | 0           | 12.81639124 | 12.27791017 | 8.65E-07    | ECM_AFFILIATED     | 8.077984765 | 1.043857714 |
| SFTPA1   | 4.847377233 | 2.429937404 | 9.88E-36    | 4.847377233 | 1.790011864 | 2.82E-09    | ECM_AFFILIATED     | 1.994856832 | 2.708014025 |
| SFTPB    | 12.27154378 | 3.639111718 | 0           | 12.27154378 | 9.326594915 | 1.44E-08    | ECM_AFFILIATED     | 3.372126148 | 1.315758205 |
| SLIT1    | 9.332044483 | 5.210268879 | 1.22E-239   | 9.332044483 | 4.686608475 | 1.46E-28    | ECM_GLYCOPROTEINS  | 1.791086929 | 1.99121487  |
| SLPI     | 9.963256567 | 9.619575161 | 0.044624172 | 9.963256567 | 8.101537288 | 6.85E-08    | ECM_REGULATORS     | 1.035727296 | 1.229798273 |
| SPOCK1   | 9.647773555 | 9.335348175 | 0.009055464 | 9.647773555 | 8.057715254 | 2.32E-09    | PROTEOGLYCANS      | 1.033466923 | 1.197333642 |
| SPOCK2   | 12.30760893 | 10.57693546 | 4.97E-80    | 12.30760893 | 10.64100847 | 3.68E-10    | PROTEOGLYCANS      | 1.163627119 | 1.156620537 |
| ST14     | 12.98721629 | 11.64842446 | 9.89E-34    | 12.98721629 | 12.35942034 | 6.86E-14    | ECM_REGULATORS     | 1.114933297 | 1.050794935 |
| TGM1     | 6.916828722 | 6.286314502 | 1.48E-07    | 6.916828722 | 5.839150847 | 3.15E-07    | ECM_REGULATORS     | 1.100299503 | 1.184560718 |
| TIMP1    | 13.64643275 | 13.03192651 | 2.51E-16    | 13.64643275 | 11.38380508 | 4.25E-19    | ECM_REGULATORS     | 1.047153906 | 1.198758469 |
| TINAGL1  | 11.81558949 | 10.54044506 | 1.42E-48    | 11.81558949 | 11.49211695 | 0.000516717 | ECM_GLYCOPROTEINS  | 1.120976337 | 1.028147342 |
| WNT10A   | 6.524623818 | 5.937454296 | 7.88E-07    | 6.524623818 | 4.509754237 | 1.75E-07    | SECRETED_FACTORS   | 1.09889247  | 1.446780351 |
| WNT3     | 7.802292995 | 6.946693294 | 7.66E-32    | 7.802292995 | 6.606927119 | 4.95E-14    | SECRETED_FACTORS   | 1.123166471 | 1.180926148 |
| WNT5A    | 9.616122417 | 9.052331202 | 9.49E-09    | 9.616122417 | 8.976315254 | 1.60E-05    | SECRETED_FACTORS   | 1.062281329 | 1.071277261 |
| WNT8A    | 0.486871103 | 0.300465258 | 5.60E-08    | 0.486871103 | 0.270888136 | 0.010431094 | SECRETED_FACTORS   | 1.620390678 | 1.797314239 |
| WNT9B    | 2.561282312 | 1.97402734  | 5.59E-16    | 2.561282312 | 2.046164407 | 0.002450592 | SECRETED_FACTORS   | 1.2974908   | 1.251748053 |
| VWA1     | 11.64718249 | 11.52490643 | 0.045242187 | 11.64718249 | 10.55708305 | 2.53E-19    | ECM_GLYCOPROTEINS  | 1.010609722 | 1.103257636 |
| VWA5A    | 10.30417128 | 9.624493223 | 1.40E-31    | 10.30417128 | 10.04003559 | 0.000598025 | ECM_GLYCOPROTEINS  | 1.07061962  | 1.026308242 |
| VWA5B2   | 5.427716462 | 4.443911154 | 7.55E-20    | 5.427716462 | 4.663959322 | 1.03E-05    | ECM_GLYCOPROTEINS  | 1.221382758 | 1.163757247 |

|             |             |             |          |             |             |             |                   |             |             |
|-------------|-------------|-------------|----------|-------------|-------------|-------------|-------------------|-------------|-------------|
| <b>VWA7</b> | 8.128580035 | 6.503785629 | 3.15E-98 | 8.128580035 | 7.673132203 | 0.000101397 | ECM_GLYCOPROTEINS | 1.249822872 | 1.059356182 |
| <b>VWF</b>  | 12.68139159 | 12.17949211 | 3.38E-14 | 12.68139159 | 12.32339492 | 0.012134172 | ECM_GLYCOPROTEINS | 1.041208572 | 1.029050167 |

---

**Thymoma (THYM)**

| <b>Signature genes</b> | <b>Expression in tumor</b> | <b>Expression in rest of Pan-Cancer</b> | <b>P-value</b> | <b>Expression in tumor</b> | <b>Expression in normal tissue</b> | <b>P-value</b> | <b>Matrisome category</b> | <b>Fold change vs. Pan-Cancer</b> | <b>Fold change vs. normal</b> |
|------------------------|----------------------------|-----------------------------------------|----------------|----------------------------|------------------------------------|----------------|---------------------------|-----------------------------------|-------------------------------|
| <b>IGFBP2</b>          | 13.22729587                | 11.54194636                             | 4.04E-15       | 13.22729587                | 11.0395                            | 0.023480987    | ECM_GLYCOPROTEINS         | 1.146019523                       | 1.198178891                   |

**Uterine corpus endometrioid carcinoma (UCEC)**

| Signature genes | Expression in tumor | Expression in rest of Pan-Cancer | P-value     | Expression in tumor | Expression in normal tissue | P-value     | Matrisome category | Fold change vs. Pan-Cancer | Fold change vs. normal |
|-----------------|---------------------|----------------------------------|-------------|---------------------|-----------------------------|-------------|--------------------|----------------------------|------------------------|
| ADAM2           | 1.25977451          | 0.555867918                      | 9.12E-11    | 1.25977451          | 0.176886957                 | 0.007768883 | ECM_REGULATORS     | 2.266319874                | 7.121918623            |
| ADAMTS14        | 7.009025            | 6.637393689                      | 0.012339467 | 7.009025            | 5.380973913                 | 1.95E-05    | ECM_REGULATORS     | 1.055990548                | 1.302556956            |
| ADAMTS15        | 9.175752941         | 7.674470536                      | 1.67E-19    | 9.175752941         | 8.121178261                 | 0.017450027 | ECM_REGULATORS     | 1.195620323                | 1.129854886            |
| AGRN            | 13.75570882         | 13.22559015                      | 3.79E-09    | 13.75570882         | 12.39993913                 | 2.23E-09    | BASEMENT_MEMBRANES | 1.040082799                | 1.109336802            |
| AGRN            | 13.75570882         | 13.22559015                      | 3.79E-09    | 13.75570882         | 12.39993913                 | 2.23E-09    | ECM_GLYCOPROTEINS  | 1.040082799                | 1.109336802            |
| AMBN            | 1.137540686         | 0.341289915                      | 6.00E-29    | 1.137540686         | 0.070569565                 | 0.04312775  | ECM_GLYCOPROTEINS  | 3.333062704                | 16.11942319            |
| AMH             | 5.806248529         | 4.810524026                      | 5.68E-09    | 5.806248529         | 3.61996087                  | 5.78E-05    | SECRETED_FACTORS   | 1.206988781                | 1.603953396            |
| ANXA3           | 9.906577451         | 9.076169795                      | 1.36E-05    | 9.906577451         | 9.286073913                 | 0.027298608 | ECM_AFFILIATED     | 1.091493182                | 1.06682087             |
| ARTN            | 6.930994118         | 5.393294866                      | 6.97E-24    | 6.930994118         | 5.172126087                 | 1.42E-09    | SECRETED_FACTORS   | 1.285113143                | 1.340066735            |
| BMP3            | 5.436103431         | 3.637397748                      | 5.29E-15    | 5.436103431         | 4.091126087                 | 0.031072481 | SECRETED_FACTORS   | 1.494503436                | 1.328754801            |
| C1QL4           | 5.277604902         | 3.43054719                       | 1.20E-21    | 5.277604902         | 2.624256522                 | 1.55E-06    | ECM_AFFILIATED     | 1.538414897                | 2.011085753            |
| C1QTNF6         | 9.882488725         | 9.372857133                      | 2.09E-07    | 9.882488725         | 9.2978                      | 0.027416453 | ECM_AFFILIATED     | 1.054373131                | 1.062884631            |
| CCL25           | 2.945980882         | 2.153530357                      | 1.26E-05    | 2.945980882         | 1.777291304                 | 0.004965522 | SECRETED_FACTORS   | 1.367977411                | 1.657567825            |
| CCL28           | 8.281962255         | 7.860008797                      | 0.011459314 | 8.281962255         | 7.433013043                 | 0.017822473 | SECRETED_FACTORS   | 1.053683586                | 1.114213335            |
| CCL7            | 2.698642157         | 2.221031615                      | 0.000923369 | 2.698642157         | 0.983704348                 | 2.93E-05    | SECRETED_FACTORS   | 1.215039956                | 2.743346782            |
| CELA3B          | 0.994448039         | 0.503059487                      | 1.47E-05    | 0.994448039         | 0.277021739                 | 0.010281359 | ECM_REGULATORS     | 1.976800092                | 3.589783395            |
| CILP2           | 7.118513235         | 6.188143638                      | 1.32E-07    | 7.118513235         | 4.789313043                 | 7.82E-07    | ECM_GLYCOPROTEINS  | 1.150347124                | 1.486332835            |
| CLEC18B         | 5.340330882         | 4.364986404                      | 3.05E-07    | 5.340330882         | 3.29926087                  | 9.56E-06    | ECM_AFFILIATED     | 1.223447312                | 1.618644628            |
| COCH            | 6.96695049          | 6.48871872                       | 0.007368587 | 6.96695049          | 5.475704348                 | 0.000370407 | ECM_GLYCOPROTEINS  | 1.073702034                | 1.272338689            |
| COL18A1         | 14.20038775         | 12.81815479                      | 2.75E-40    | 14.20038775         | 13.63617826                 | 0.005368289 | BASEMENT_MEMBRANES | 1.107834004                | 1.041375925            |
| COL18A1         | 14.20038775         | 12.81815479                      | 2.75E-40    | 14.20038775         | 13.63617826                 | 0.005368289 | COLLAGENS          | 1.107834004                | 1.041375925            |
| COL26A1         | 8.344038235         | 4.61903543                       | 3.93E-81    | 8.344038235         | 5.604513043                 | 1.79E-05    | COLLAGENS          | 1.806446034                | 1.488806997            |
| COL9A1          | 5.775592157         | 3.818673772                      | 5.54E-23    | 5.775592157         | 3.733295652                 | 0.007373962 | COLLAGENS          | 1.512460216                | 1.547049228            |
| COL9A2          | 10.62331618         | 8.640044349                      | 4.41E-40    | 10.62331618         | 9.057813043                 | 9.92E-05    | COLLAGENS          | 1.229544172                | 1.17283456             |
| CRELD2          | 10.90774951         | 10.41534795                      | 1.15E-17    | 10.90774951         | 10.19903478                 | 0.000323651 | ECM_GLYCOPROTEINS  | 1.047276535                | 1.069488412            |
| CSPG5           | 7.208827941         | 5.934973549                      | 1.70E-12    | 7.208827941         | 4.663552174                 | 8.94E-10    | ECM_AFFILIATED     | 1.214635227                | 1.545780485            |
| CST6            | 5.639136765         | 4.891841782                      | 0.001542159 | 5.639136765         | 3.41056087                  | 2.35E-05    | ECM_REGULATORS     | 1.152763523                | 1.653433843            |
| CSTB            | 12.95240686         | 12.69972501                      | 0.00659123  | 12.95240686         | 11.57508696                 | 4.48E-11    | ECM_REGULATORS     | 1.01989664                 | 1.118990027            |
| CSTL1           | 0.794610294         | 0.550957741                      | 0.000374308 | 0.794610294         | 0.070821739                 | 0.006068432 | ECM_REGULATORS     | 1.442234557                | 11.21986418            |
| CTSV            | 9.830607353         | 7.273498235                      | 6.91E-43    | 9.830607353         | 6.566747826                 | 5.36E-10    | ECM_REGULATORS     | 1.351565235                | 1.497028303            |
| CXCL3           | 5.983512255         | 5.303557102                      | 0.000316713 | 5.983512255         | 4.622030435                 | 0.008136191 | SECRETED_FACTORS   | 1.128207378                | 1.294563577            |
| CXCL5           | 5.951929412         | 5.052951755                      | 0.000211918 | 5.951929412         | 3.418186957                 | 0.000292262 | SECRETED_FACTORS   | 1.177911387                | 1.741253327            |
| EGFL6           | 7.937783333         | 5.700566873                      | 2.38E-26    | 7.937783333         | 6.408521739                 | 0.001014967 | SECRETED_FACTORS   | 1.392455086                | 1.238629384            |
| EGLN3           | 10.64701225         | 9.586904109                      | 3.93E-10    | 10.64701225         | 9.265617391                 | 7.59E-05    | ECM_REGULATORS     | 1.110578778                | 1.14908827             |
| EMID1           | 10.93848529         | 7.99631111                       | 2.84E-118   | 10.93848529         | 10.09030435                 | 0.039632563 | ECM_GLYCOPROTEINS  | 1.367941435                | 1.084059005            |
| ESM1            | 8.214661765         | 7.674007447                      | 0.002872182 | 8.214661765         | 5.764843478                 | 1.58E-08    | PROTEOGLYCANS      | 1.07045267                 | 1.424958335            |
| FBN2            | 9.191601471         | 7.118162206                      | 1.68E-29    | 9.191601471         | 7.685291304                 | 0.012510179 | ECM_GLYCOPROTEINS  | 1.291288566                | 1.195999098            |
| FGF18           | 9.066966176         | 4.587133837                      | 2.48E-222   | 9.066966176         | 6.553856522                 | 8.90E-08    | SECRETED_FACTORS   | 1.976608161                | 1.383455092            |
| FGF3            | 1.542066667         | 0.352845323                      | 4.85E-41    | 1.542066667         | 0.113369565                 | 0.009915844 | SECRETED_FACTORS   | 4.370375821                | 13.60212208            |
| FGF4            | 1.205833333         | 0.464769136                      | 2.66E-12    | 1.205833333         | 0.084634783                 | 0.02339458  | SECRETED_FACTORS   | 2.594478078                | 14.24749135            |
| FRAS1           | 9.84159902          | 8.321466934                      | 9.45E-18    | 9.84159902          | 8.825286957                 | 0.007026122 | ECM_GLYCOPROTEINS  | 1.182675975                | 1.115159095            |

|         |             |             |             |             |             |             |                    |             |             |
|---------|-------------|-------------|-------------|-------------|-------------|-------------|--------------------|-------------|-------------|
| GPC2    | 6.881244118 | 5.516158391 | 7.90E-20    | 6.881244118 | 5.452595652 | 8.98E-05    | ECM_AFFILIATED     | 1.247470364 | 1.262012545 |
| HAPLN1  | 7.217173039 | 5.175917735 | 2.25E-21    | 7.217173039 | 2.752743478 | 1.40E-14    | PROTEOGLYCANS      | 1.394375531 | 2.621810966 |
| HAPLN3  | 10.69941225 | 8.43607989  | 1.27E-73    | 10.69941225 | 8.978226087 | 6.33E-07    | PROTEOGLYCANS      | 1.268291955 | 1.191706708 |
| HYAL3   | 7.521334314 | 7.050463809 | 1.33E-11    | 7.521334314 | 6.614234783 | 8.31E-06    | ECM_REGULATORS     | 1.066785749 | 1.137143534 |
| IGFBP2  | 13.41750098 | 11.38359689 | 1.16E-36    | 13.41750098 | 12.29811739 | 0.004892505 | ECM_GLYCOPROTEINS  | 1.178669722 | 1.091020727 |
| KAZALD1 | 9.309138725 | 7.345047088 | 4.17E-57    | 9.309138725 | 8.446686957 | 0.026069037 | ECM_REGULATORS     | 1.267403546 | 1.102105331 |
| KCP     | 6.880545098 | 5.905436181 | 4.34E-09    | 6.880545098 | 5.01146087  | 0.000248199 | ECM_GLYCOPROTEINS  | 1.165120558 | 1.372961952 |
| LAMA1   | 9.202537745 | 7.303030205 | 2.95E-22    | 9.202537745 | 7.163873913 | 0.000226808 | ECM_GLYCOPROTEINS  | 1.260098546 | 1.284575616 |
| LAMA1   | 9.202537745 | 7.303030205 | 2.95E-22    | 9.202537745 | 7.163873913 | 0.000226808 | BASEMENT_MEMBRANES | 1.260098546 | 1.284575616 |
| LAMA5   | 13.13214314 | 12.23349818 | 2.12E-20    | 13.13214314 | 12.27125652 | 0.000135433 | BASEMENT_MEMBRANES | 1.073457726 | 1.070154724 |
| LAMA5   | 13.13214314 | 12.23349818 | 2.12E-20    | 13.13214314 | 12.27125652 | 0.000135433 | ECM_GLYCOPROTEINS  | 1.073457726 | 1.070154724 |
| LAMB4   | 3.686614706 | 3.049299148 | 5.68E-07    | 3.686614706 | 2.650082609 | 0.004067901 | BASEMENT_MEMBRANES | 1.209003947 | 1.391131995 |
| LAMB4   | 3.686614706 | 3.049299148 | 5.68E-07    | 3.686614706 | 2.650082609 | 0.004067901 | ECM_GLYCOPROTEINS  | 1.209003947 | 1.391131995 |
| LAMC2   | 11.81622843 | 9.999060248 | 7.58E-11    | 11.81622843 | 10.3531     | 0.00065014  | ECM_GLYCOPROTEINS  | 1.181733897 | 1.141322737 |
| LAMC2   | 11.81622843 | 9.999060248 | 7.58E-11    | 11.81622843 | 10.3531     | 0.00065014  | BASEMENT_MEMBRANES | 1.181733897 | 1.141322737 |
| LGALS14 | 0.891853431 | 0.363141427 | 6.47E-15    | 0.891853431 | 0.179104348 | 0.030346367 | ECM_AFFILIATED     | 2.455939659 | 4.9795186   |
| LGALS7  | 3.358035784 | 2.66306872  | 0.002785256 | 3.358035784 | 1.202713043 | 6.77E-05    | ECM_AFFILIATED     | 1.260964751 | 2.792050691 |
| LGALS9  | 11.59434167 | 10.8248943  | 8.47E-14    | 11.59434167 | 10.73176957 | 0.001530684 | ECM_AFFILIATED     | 1.071081282 | 1.080375571 |
| LOXL1   | 9.91242598  | 9.145221246 | 2.97E-08    | 9.91242598  | 9.456017391 | 0.040403901 | ECM_REGULATORS     | 1.083891326 | 1.048266471 |
| LRG1    | 9.677417647 | 8.301315179 | 1.07E-10    | 9.677417647 | 8.565013043 | 0.020659627 | ECM_GLYCOPROTEINS  | 1.165769211 | 1.129877748 |
| MATN4   | 3.362613725 | 2.522882143 | 1.89E-11    | 3.362613725 | 1.969578261 | 0.000936568 | ECM_GLYCOPROTEINS  | 1.33284614  | 1.707276016 |
| MFAP2   | 11.8549451  | 8.950824838 | 2.39E-53    | 11.8549451  | 10.9845     | 0.020607537 | ECM_GLYCOPROTEINS  | 1.324452809 | 1.079243033 |
| MMP10   | 6.72962451  | 4.640318172 | 6.32E-16    | 6.72962451  | 4.30173913  | 0.001390364 | ECM_REGULATORS     | 1.450250664 | 1.564396237 |
| MMP11   | 12.44240245 | 9.873782752 | 1.82E-37    | 12.44240245 | 11.39246087 | 0.010579988 | ECM_REGULATORS     | 1.260145454 | 1.092161087 |
| MMP12   | 7.007539706 | 5.718196073 | 3.39E-06    | 7.007539706 | 2.976891304 | 3.52E-11    | ECM_REGULATORS     | 1.225480836 | 2.35397903  |
| MMP15   | 11.36485588 | 10.75782345 | 2.07E-08    | 11.36485588 | 9.910326087 | 1.04E-09    | ECM_REGULATORS     | 1.056427068 | 1.146769116 |
| MUC1    | 13.4798201  | 10.67021314 | 3.67E-34    | 13.4798201  | 11.26607391 | 4.44E-07    | ECM_AFFILIATED     | 1.263313106 | 1.196496686 |
| MUC16   | 10.96241912 | 4.797925548 | 1.06E-114   | 10.96241912 | 9.406586957 | 0.008556031 | ECM_AFFILIATED     | 2.284824766 | 1.165398159 |
| MUC20   | 10.0669049  | 8.894625619 | 2.35E-10    | 10.0669049  | 8.74333913  | 0.002719038 | ECM_AFFILIATED     | 1.13179636  | 1.151379896 |
| MUC4    | 7.290420098 | 6.646361627 | 0.019074082 | 7.290420098 | 5.7899      | 0.012720882 | ECM_AFFILIATED     | 1.096903916 | 1.25916166  |
| MUC5AC  | 5.143475    | 3.154161932 | 2.00E-11    | 5.143475    | 1.70486087  | 1.71E-06    | ECM_AFFILIATED     | 1.630694654 | 3.016947067 |
| NGLY1   | 10.09489608 | 9.957309619 | 0.000680384 | 10.09489608 | 9.664343478 | 4.26E-05    | ECM_REGULATORS     | 1.013817634 | 1.044550631 |
| OGFOD2  | 9.398629412 | 9.065212338 | 9.54E-13    | 9.398629412 | 8.88106087  | 0.000633873 | ECM_REGULATORS     | 1.036779842 | 1.058277783 |
| OTOG    | 2.449189706 | 1.231771002 | 2.49E-20    | 2.449189706 | 0.231069565 | 1.02E-06    | ECM_GLYCOPROTEINS  | 1.988348241 | 10.59936086 |
| P4HA1   | 11.55693529 | 11.10732871 | 1.57E-10    | 11.55693529 | 10.88210435 | 4.28E-05    | ECM_REGULATORS     | 1.040478372 | 1.062012909 |
| PI3     | 7.432301471 | 5.777735146 | 3.08E-07    | 7.432301471 | 2.92613913  | 4.94E-09    | ECM_REGULATORS     | 1.286369361 | 2.539968586 |
| PLOD1   | 13.48194216 | 12.50256311 | 2.64E-46    | 13.48194216 | 12.6600087  | 6.24E-06    | ECM_REGULATORS     | 1.078334262 | 1.06492361  |
| PLXNB1  | 12.54746667 | 11.80080558 | 9.76E-19    | 12.54746667 | 11.80721304 | 0.000182058 | ECM_AFFILIATED     | 1.063272044 | 1.062695034 |
| PLXNB2  | 13.84316618 | 13.66575592 | 0.003596769 | 13.84316618 | 13.46838696 | 0.010400115 | ECM_AFFILIATED     | 1.012982104 | 1.027826585 |
| PRSS1   | 3.392787745 | 1.860342269 | 3.56E-13    | 3.392787745 | 0.573565217 | 8.33E-05    | ECM_REGULATORS     | 1.823743836 | 5.915260623 |
| PRSS2   | 5.185112255 | 2.955715686 | 3.46E-19    | 5.185112255 | 1.281695652 | 5.30E-08    | ECM_REGULATORS     | 1.754266244 | 4.045509748 |
| RSPO4   | 4.789696078 | 4.043109953 | 7.59E-05    | 4.789696078 | 3.29873913  | 0.024422621 | ECM_GLYCOPROTEINS  | 1.184656399 | 1.451977828 |
| SEMA3F  | 11.03173235 | 10.55742698 | 0.000230002 | 11.03173235 | 10.24145652 | 0.000326563 | ECM_AFFILIATED     | 1.044926228 | 1.077164398 |
| SEMA4D  | 10.74612059 | 10.42550944 | 6.80E-05    | 10.74612059 | 10.0256913  | 2.92E-06    | ECM_AFFILIATED     | 1.030752565 | 1.071858315 |
| SEMA4F  | 8.855987745 | 8.659497007 | 0.007053614 | 8.855987745 | 8.48786087  | 0.021818293 | ECM_AFFILIATED     | 1.02269078  | 1.043370984 |
| SFTA2   | 5.009406863 | 3.122960166 | 1.89E-13    | 5.009406863 | 3.440447826 | 0.021089012 | ECM_AFFILIATED     | 1.604057239 | 1.456033376 |



|               |             |             |             |             |             |             |                   |             |             |
|---------------|-------------|-------------|-------------|-------------|-------------|-------------|-------------------|-------------|-------------|
| <b>SLPI</b>   | 13.43571029 | 9.350146459 | 7.97E-50    | 13.43571029 | 10.82352609 | 8.95E-06    | ECM_REGULATORS    | 1.436951854 | 1.24134318  |
| <b>SPP1</b>   | 12.42730392 | 11.94316859 | 0.030259761 | 12.42730392 | 9.076826087 | 1.69E-11    | ECM_GLYCOPROTEINS | 1.04053659  | 1.369124384 |
| <b>ST14</b>   | 13.16738873 | 11.62216987 | 4.03E-17    | 13.16738873 | 10.1137087  | 6.47E-15    | ECM_REGULATORS    | 1.13295442  | 1.301934742 |
| <b>TGM3</b>   | 5.601064216 | 3.9904153   | 2.29E-12    | 5.601064216 | 3.809708696 | 0.002393461 | ECM_REGULATORS    | 1.403629395 | 1.470208004 |
| <b>TGM5</b>   | 4.021237255 | 2.949439448 | 1.27E-08    | 4.021237255 | 1.308186957 | 2.63E-07    | ECM_REGULATORS    | 1.363390341 | 3.073901047 |
| <b>TGM7</b>   | 3.607103922 | 0.533153805 | 1.47E-304   | 3.607103922 | 1.219634783 | 1.16E-05    | ECM_REGULATORS    | 6.765597261 | 2.95752792  |
| <b>WNT10A</b> | 6.392014216 | 5.772225994 | 0.000871628 | 6.392014216 | 4.16966087  | 0.000180249 | SECRETED_FACTORS  | 1.107374213 | 1.532981798 |
| <b>WNT3A</b>  | 3.423218137 | 2.756148488 | 0.000405517 | 3.423218137 | 2.221704348 | 0.008000136 | SECRETED_FACTORS  | 1.242029648 | 1.540807237 |
| <b>WNT7A</b>  | 8.431003431 | 3.478866092 | 4.96E-105   | 8.431003431 | 5.876117391 | 0.000917971 | SECRETED_FACTORS  | 2.423491796 | 1.434791525 |
| <b>VWA1</b>   | 12.1498848  | 11.46398755 | 5.26E-12    | 12.1498848  | 11.65517391 | 0.015342231 | ECM_GLYCOPROTEINS | 1.0598306   | 1.042445604 |
| <b>ZP3</b>    | 8.354165196 | 7.719755915 | 8.58E-10    | 8.354165196 | 7.57853913  | 0.005926778 | ECM_GLYCOPROTEINS | 1.082179966 | 1.102345063 |

**Uterine Carcinosarcoma (UCS)**

| Signature genes | Expression in tumor | Expression in rest of Pan-Cancer | P-value     | Expression in tumor | Expression in normal tissue | P-value     | Matrisome category | Fold change vs. Pan-Cancer | Fold change vs. normal |
|-----------------|---------------------|----------------------------------|-------------|---------------------|-----------------------------|-------------|--------------------|----------------------------|------------------------|
| ACAN            | 7.857208772         | 6.486774535                      | 1.84E-05    | 7.857208772         | 5.695634783                 | 9.38E-05    | PROTEOGLYCANS      | 1.211265896                | 1.379514149            |
| ADAM12          | 9.442970175         | 8.45376836                       | 0.003707233 | 9.442970175         | 7.305026087                 | 0.000101758 | ECM_REGULATORS     | 1.11701312                 | 1.29266755             |
| ADAM18          | 0.923198246         | 0.466232387                      | 0.006022229 | 0.923198246         | 0.033043478                 | 0.003379328 | ECM_REGULATORS     | 1.980124656                | 27.93889428            |
| ADAM19          | 9.859257895         | 9.052868667                      | 0.00019911  | 9.859257895         | 8.919530435                 | 0.000189325 | ECM_REGULATORS     | 1.089075547                | 1.105356158            |
| ADAM21          | 4.239205263         | 2.916992167                      | 1.53E-11    | 4.239205263         | 2.62113913                  | 2.95E-05    | ECM_REGULATORS     | 1.453279618                | 1.617314096            |
| ADAM23          | 7.990363158         | 6.804231515                      | 0.000988143 | 7.990363158         | 6.880869565                 | 0.025151768 | ECM_REGULATORS     | 1.174322646                | 1.161243224            |
| ADAMTS12        | 8.879340351         | 8.015026999                      | 0.005520197 | 8.879340351         | 8.016113043                 | 0.01042488  | ECM_REGULATORS     | 1.107836611                | 1.107686519            |
| ADAMTS14        | 7.927517544         | 6.694489942                      | 9.52E-06    | 7.927517544         | 5.380973913                 | 3.94E-08    | ECM_REGULATORS     | 1.184185444                | 1.473249577            |
| ADAMTS15        | 9.476315789         | 7.768265369                      | 4.68E-08    | 9.476315789         | 8.121178261                 | 0.002199085 | ECM_REGULATORS     | 1.219875395                | 1.166864645            |
| ADAMTS17        | 8.175587719         | 6.483051256                      | 5.60E-15    | 8.175587719         | 7.078534783                 | 0.004868359 | ECM_REGULATORS     | 1.261070967                | 1.154983054            |
| ADAMTS20        | 2.683473684         | 1.750250412                      | 0.002409239 | 2.683473684         | 0.429730435                 | 8.21E-06    | ECM_REGULATORS     | 1.533194145                | 6.244551158            |
| ADAMTS7         | 10.60375439         | 8.052027565                      | 4.14E-36    | 10.60375439         | 8.634178261                 | 1.33E-08    | ECM_REGULATORS     | 1.316904879                | 1.228113906            |
| ADAMTSL2        | 8.75067193          | 8.187550441                      | 0.014007598 | 8.75067193          | 7.361986957                 | 3.78E-05    | ECM_REGULATORS     | 1.068777773                | 1.1886291              |
| AMBN            | 1.647994737         | 0.341967584                      | 4.58E-23    | 1.647994737         | 0.070569565                 | 0.000103876 | ECM_GLYCOPROTEINS  | 4.819154839                | 23.35276874            |
| AMELX           | 1.581361404         | 0.312183586                      | 7.52E-26    | 1.581361404         | 0                           | 0.000313026 | ECM_GLYCOPROTEINS  | 5.065485424                | Inf                    |
| AMH             | 6.18262807          | 4.842549482                      | 3.08E-05    | 6.18262807          | 3.61996087                  | 7.34E-08    | SECRETED_FACTORS   | 1.276729973                | 1.707926769            |
| ANGPTL6         | 4.477691228         | 3.967031074                      | 0.016379767 | 4.477691228         | 2.269                       | 7.88E-07    | SECRETED_FACTORS   | 1.128726028                | 1.97342055             |
| ARTN            | 6.427557895         | 5.505518121                      | 0.001378862 | 6.427557895         | 5.172126087                 | 0.000293303 | SECRETED_FACTORS   | 1.167475568                | 1.242730318            |
| ASTL            | 3.431582456         | 1.932187919                      | 2.04E-13    | 3.431582456         | 2.129182609                 | 0.001499684 | ECM_REGULATORS     | 1.776008649                | 1.611690065            |
| BDNF            | 6.504277193         | 5.220632148                      | 4.13E-06    | 6.504277193         | 3.41316087                  | 4.25E-11    | SECRETED_FACTORS   | 1.245879236                | 1.905646245            |
| BGN             | 14.20404211         | 13.2232426                       | 0.000212393 | 14.20404211         | 12.8896                     | 0.000106175 | PROTEOGLYCANS      | 1.07417239                 | 1.101976951            |
| BMP1            | 11.57102982         | 10.63382365                      | 1.65E-10    | 11.57102982         | 10.78095652                 | 0.001204345 | ECM_REGULATORS     | 1.088134447                | 1.073284156            |
| BMP3            | 5.417921053         | 3.680793931                      | 5.08E-05    | 5.417921053         | 4.091126087                 | 0.038653378 | SECRETED_FACTORS   | 1.471943595                | 1.324310456            |
| BMP5            | 6.84017193          | 3.524598715                      | 1.75E-16    | 6.84017193          | 0.718186957                 | 7.69E-11    | SECRETED_FACTORS   | 1.940695234                | 9.524221886            |
| BMP7            | 10.94862632         | 8.013109166                      | 3.51E-09    | 10.94862632         | 7.91606087                  | 1.14E-06    | SECRETED_FACTORS   | 1.366339343                | 1.383090213            |
| C1QL1           | 7.730636842         | 5.886649377                      | 5.44E-06    | 7.730636842         | 4.705247826                 | 2.98E-09    | ECM_AFFILIATED     | 1.313249074                | 1.642981864            |
| C1QL2           | 2.239747368         | 1.613373394                      | 0.042913158 | 2.239747368         | 0.330543478                 | 3.32E-06    | ECM_AFFILIATED     | 1.388238691                | 6.775953893            |
| C1QL4           | 7.521966667         | 3.567848591                      | 1.09E-26    | 7.521966667         | 2.624256522                 | 2.87E-15    | ECM_AFFILIATED     | 2.108263979                | 2.866322939            |
| C1QTNF3         | 9.453675439         | 7.926686692                      | 2.80E-09    | 9.453675439         | 8.301356522                 | 0.002913023 | ECM_AFFILIATED     | 1.192638968                | 1.138810918            |
| C1QTNF6         | 10.25313509         | 9.389791841                      | 2.69E-06    | 10.25313509         | 9.2978                      | 0.001117695 | ECM_AFFILIATED     | 1.091944876                | 1.102748509            |
| CCL25           | 3.101917544         | 2.257443643                      | 0.01395723  | 3.101917544         | 1.777291304                 | 0.004020765 | SECRETED_FACTORS   | 1.374084156                | 1.745306206            |
| CCL7            | 3.455363158         | 2.299664669                      | 2.56E-05    | 3.455363158         | 0.983704348                 | 1.12E-07    | SECRETED_FACTORS   | 1.502550874                | 3.51260332             |
| CELA3A          | 1.789129825         | 0.54098906                       | 3.31E-07    | 1.789129825         | 0.305256522                 | 0.008552786 | ECM_REGULATORS     | 3.307146032                | 5.861069943            |
| CELA3B          | 1.03767193          | 0.521781812                      | 0.014663176 | 1.03767193          | 0.277021739                 | 0.044945948 | ECM_REGULATORS     | 1.98870851                 | 3.745814076            |
| CILP2           | 9.80345614          | 6.318937459                      | 4.40E-25    | 9.80345614          | 4.789313043                 | 3.56E-21    | ECM_GLYCOPROTEINS  | 1.551440603                | 2.046944113            |
| CLEC18A         | 5.695898246         | 4.963214036                      | 0.022607412 | 5.695898246         | 4.195034783                 | 0.003358875 | ECM_AFFILIATED     | 1.147622932                | 1.357771399            |
| CLEC18B         | 5.856829825         | 4.468262128                      | 0.000116954 | 5.856829825         | 3.29926087                  | 1.66E-06    | ECM_AFFILIATED     | 1.310762363                | 1.775194523            |
| CLEC18C         | 4.153394737         | 3.441509923                      | 0.044624202 | 4.153394737         | 2.504004348                 | 0.004341649 | ECM_AFFILIATED     | 1.206852466                | 1.658701088            |
| CLEC4F          | 5.618907018         | 3.273690719                      | 2.87E-21    | 5.618907018         | 4.591465217                 | 0.005283449 | ECM_AFFILIATED     | 1.716382976                | 1.223772097            |
| COCH            | 8.167147368         | 6.465038523                      | 3.32E-07    | 8.167147368         | 5.475704348                 | 3.89E-09    | ECM_GLYCOPROTEINS  | 1.263278995                | 1.491524533            |
| COL11A1         | 9.379336842         | 7.404896405                      | 9.85E-05    | 9.379336842         | 4.596656522                 | 4.76E-08    | COLLAGENS          | 1.266639846                | 2.040469371            |

|          |             |             |             |             |             |             |                    |             |             |
|----------|-------------|-------------|-------------|-------------|-------------|-------------|--------------------|-------------|-------------|
| COL11A2  | 10.02298947 | 5.967268255 | 1.40E-45    | 10.02298947 | 5.935082609 | 2.87E-11    | COLLAGENS          | 1.679661286 | 1.688770003 |
| COL13A1  | 8.551903509 | 6.36770464  | 1.59E-18    | 8.551903509 | 6.571269565 | 1.14E-05    | COLLAGENS          | 1.343011963 | 1.301408111 |
| COL19A1  | 3.872833333 | 2.56764302  | 1.84E-05    | 3.872833333 | 1.078930435 | 3.05E-05    | COLLAGENS          | 1.508322342 | 3.58951162  |
| COL1A1   | 16.86772982 | 14.7236684  | 1.25E-07    | 16.86772982 | 15.53188261 | 0.002901817 | COLLAGENS          | 1.145620057 | 1.08600678  |
| COL22A1  | 8.319963158 | 6.536482608 | 1.15E-06    | 8.319963158 | 6.779047826 | 0.021960001 | COLLAGENS          | 1.272850194 | 1.22730557  |
| COL23A1  | 9.58142807  | 6.574815896 | 9.54E-18    | 9.58142807  | 7.756191304 | 9.91E-06    | COLLAGENS          | 1.457292222 | 1.235326424 |
| COL24A1  | 7.054342105 | 5.321554832 | 9.83E-11    | 7.054342105 | 5.235378261 | 2.70E-05    | COLLAGENS          | 1.325616728 | 1.347436948 |
| COL25A1  | 8.235794737 | 3.874184458 | 7.71E-44    | 8.235794737 | 4.969104348 | 2.61E-09    | COLLAGENS          | 2.125813788 | 1.65740024  |
| COL26A1  | 11.21732281 | 4.779782704 | 2.37E-66    | 11.21732281 | 5.604513043 | 3.25E-22    | COLLAGENS          | 2.346826938 | 2.001480364 |
| COL2A1   | 11.63325263 | 4.132532848 | 7.36E-63    | 11.63325263 | 4.445930435 | 6.87E-16    | COLLAGENS          | 2.815041782 | 2.616606985 |
| COL4A1   | 14.07948246 | 13.18608188 | 0.000391508 | 14.07948246 | 13.23313913 | 0.00317155  | BASEMENT_MEMBRANES | 1.067753301 | 1.063956354 |
| COL4A1   | 14.07948246 | 13.18608188 | 0.000391508 | 14.07948246 | 13.23313913 | 0.00317155  | COLLAGENS          | 1.067753301 | 1.063956354 |
| COL5A2   | 13.3406386  | 11.49619736 | 3.26E-10    | 13.3406386  | 11.48836957 | 3.66E-06    | COLLAGENS          | 1.160439246 | 1.161229931 |
| COL8A2   | 11.04227719 | 8.903040211 | 1.69E-14    | 11.04227719 | 8.581756522 | 2.01E-08    | COLLAGENS          | 1.240281626 | 1.286715274 |
| COL9A1   | 7.178663158 | 3.948480326 | 2.02E-17    | 7.178663158 | 3.733295652 | 1.60E-05    | COLLAGENS          | 1.818082544 | 1.922875611 |
| COL9A2   | 11.34673158 | 8.736522924 | 3.42E-20    | 11.34673158 | 9.057813043 | 1.14E-07    | COLLAGENS          | 1.298769737 | 1.252701013 |
| COL9A3   | 11.05883509 | 6.89508861  | 1.28E-35    | 11.05883509 | 6.691252174 | 2.99E-13    | COLLAGENS          | 1.603871352 | 1.652730281 |
| CRELD2   | 10.68861754 | 10.39259592 | 0.007323398 | 10.68861754 | 10.19903478 | 0.004449481 | ECM_GLYCOPROTEINS  | 1.028483897 | 1.048002852 |
| CRISPLD1 | 10.52219123 | 8.102431429 | 2.32E-15    | 10.52219123 | 9.166808696 | 6.60E-05    | ECM_GLYCOPROTEINS  | 1.298646131 | 1.147857622 |
| CRLF1    | 8.930954386 | 7.079522474 | 8.71E-11    | 8.930954386 | 6.027856522 | 1.71E-08    | SECRETED_FACTORS   | 1.261519321 | 1.481613631 |
| CSH1     | 0.664073684 | 0.235275101 | 0.000162124 | 0.664073684 | 0.033043478 | 0.032308489 | SECRETED_FACTORS   | 2.822541282 | 20.09696676 |
| CSH2     | 0.897173684 | 0.41880372  | 0.001273547 | 0.897173684 | 0.036713043 | 0.003079961 | SECRETED_FACTORS   | 2.142229501 | 24.43746416 |
| CSPG5    | 7.002987719 | 6.048453576 | 0.004957318 | 7.002987719 | 4.663552174 | 1.19E-11    | ECM_AFFILIATED     | 1.157814577 | 1.501642409 |
| CTHRC1   | 11.28251228 | 9.064828389 | 4.95E-11    | 11.28251228 | 7.590926087 | 3.38E-16    | ECM_GLYCOPROTEINS  | 1.244647091 | 1.486315655 |
| CTSV     | 8.884829825 | 7.380766347 | 1.59E-05    | 8.884829825 | 6.566747826 | 2.78E-09    | ECM_REGULATORS     | 1.203781478 | 1.353003048 |
| DSPP     | 0.88294386  | 0.554155829 | 0.013777276 | 0.88294386  | 0.315917391 | 0.022669162 | ECM_GLYCOPROTEINS  | 1.593313312 | 2.794856769 |
| EGFL6    | 9.561731579 | 5.883036999 | 6.34E-20    | 9.561731579 | 6.408521739 | 9.96E-08    | SECRETED_FACTORS   | 1.625305362 | 1.492033884 |
| EGFLAM   | 9.150650877 | 7.619756213 | 6.22E-11    | 9.150650877 | 8.22733913  | 0.013855457 | ECM_GLYCOPROTEINS  | 1.200911239 | 1.112224831 |
| EGLN2    | 11.92390526 | 11.42687881 | 1.80E-08    | 11.92390526 | 11.64072174 | 0.035876436 | ECM_REGULATORS     | 1.043496257 | 1.024326973 |
| ELN      | 13.04074386 | 10.03434578 | 1.89E-23    | 13.04074386 | 11.17933043 | 9.20E-05    | ECM_GLYCOPROTEINS  | 1.299610771 | 1.166504912 |
| ELSPBP1  | 1.233740351 | 0.462908466 | 2.56E-06    | 1.233740351 | 0.042082609 | 0.006816481 | ECM_GLYCOPROTEINS  | 2.665192887 | 29.31710721 |
| EMILIN3  | 9.947429825 | 4.921559415 | 4.16E-50    | 9.947429825 | 8.721282609 | 0.030799971 | ECM_GLYCOPROTEINS  | 2.021194704 | 1.140592533 |
| EPYC     | 5.2868      | 2.56212255  | 2.07E-13    | 5.2868      | 2.319434783 | 2.44E-05    | PROTEOGLYCANS      | 2.063445404 | 2.279348417 |
| ESM1     | 9.577270175 | 7.690784631 | 1.78E-08    | 9.577270175 | 5.764843478 | 8.25E-15    | PROTEOGLYCANS      | 1.245291688 | 1.66132354  |
| FAM20C   | 11.29262982 | 10.67574581 | 0.000592315 | 11.29262982 | 10.43004783 | 0.000712512 | ECM_REGULATORS     | 1.057783693 | 1.082701634 |
| FBLN2    | 12.08138596 | 10.23773861 | 2.47E-11    | 12.08138596 | 10.76645652 | 0.000334305 | ECM_GLYCOPROTEINS  | 1.180083456 | 1.122132053 |
| FBN2     | 12.5241614  | 7.167113298 | 7.04E-55    | 12.5241614  | 7.685291304 | 1.73E-20    | ECM_GLYCOPROTEINS  | 1.747448503 | 1.629627415 |
| FBN3     | 9.5832      | 4.220175139 | 8.44E-32    | 9.5832      | 5.403508696 | 1.70E-10    | ECM_GLYCOPROTEINS  | 2.270806231 | 1.773514311 |
| FGF11    | 9.166450877 | 7.669269674 | 2.94E-07    | 9.166450877 | 6.362547826 | 2.65E-10    | SECRETED_FACTORS   | 1.195218224 | 1.440688719 |
| FGF18    | 8.400885965 | 4.873462493 | 1.53E-31    | 8.400885965 | 6.553856522 | 3.83E-05    | SECRETED_FACTORS   | 1.723802323 | 1.281823295 |
| FGF21    | 1.462912281 | 0.77722977  | 0.011005119 | 1.462912281 | 0.037621739 | 0.000371925 | SECRETED_FACTORS   | 1.882213391 | 38.88475957 |
| FGF23    | 2.501312281 | 0.533258389 | 4.11E-36    | 2.501312281 | 0.319456522 | 9.54E-05    | SECRETED_FACTORS   | 4.690619653 | 7.829898939 |
| FGF3     | 1.104749123 | 0.435866779 | 0.000242216 | 1.104749123 | 0.113369565 | 0.001399844 | SECRETED_FACTORS   | 2.534602721 | 9.744671074 |
| FGF4     | 2.005589474 | 0.48730489  | 2.96E-14    | 2.005589474 | 0.084634783 | 0.000281819 | SECRETED_FACTORS   | 4.115676891 | 23.69698854 |
| FRAS1    | 10.52181754 | 8.388944219 | 1.09E-10    | 10.52181754 | 8.825286957 | 1.37E-05    | ECM_GLYCOPROTEINS  | 1.254248123 | 1.192235176 |
| FREM2    | 9.3833      | 6.670190038 | 3.07E-09    | 9.3833      | 8.082026087 | 0.008886599 | ECM_AFFILIATED     | 1.406751524 | 1.161008378 |

|         |             |             |             |             |             |             |                    |             |             |
|---------|-------------|-------------|-------------|-------------|-------------|-------------|--------------------|-------------|-------------|
| GPC1    | 12.62100175 | 11.58144586 | 5.38E-07    | 12.62100175 | 11.00271739 | 1.38E-09    | ECM_AFFILIATED     | 1.089760459 | 1.147080426 |
| GPC2    | 9.43875614  | 5.553868993 | 3.30E-44    | 9.43875614  | 5.452595652 | 5.86E-23    | ECM_AFFILIATED     | 1.699492039 | 1.731057416 |
| GPC3    | 11.62242982 | 8.029928351 | 5.03E-21    | 11.62242982 | 8.608508696 | 1.32E-07    | ECM_AFFILIATED     | 1.447388982 | 1.350109553 |
| GPC4    | 11.39765789 | 9.928789367 | 4.73E-07    | 11.39765789 | 10.3643087  | 0.001642851 | ECM_AFFILIATED     | 1.147940345 | 1.099702665 |
| GPC5    | 3.718975439 | 2.905175628 | 0.015104549 | 3.718975439 | 1.530782609 | 2.83E-06    | ECM_AFFILIATED     | 1.280120693 | 2.42946021  |
| HAPLN1  | 7.911817544 | 5.245555877 | 2.62E-11    | 7.911817544 | 2.752743478 | 8.23E-14    | PROTEOGLYCANS      | 1.508289632 | 2.87415722  |
| HAPLN3  | 10.02856491 | 8.533685062 | 2.64E-10    | 10.02856491 | 8.978226087 | 0.001823549 | PROTEOGLYCANS      | 1.175174012 | 1.116987344 |
| HAPLN4  | 6.984492982 | 3.58996976  | 2.22E-25    | 6.984492982 | 5.753495652 | 0.014236955 | PROTEOGLYCANS      | 1.945557609 | 1.21395642  |
| HMCN1   | 9.692008772 | 8.672879108 | 0.000625867 | 9.692008772 | 8.312547826 | 8.52E-05    | BASEMENT_MEMBRANES | 1.117507652 | 1.165949234 |
| HMCN1   | 9.692008772 | 8.672879108 | 0.000625867 | 9.692008772 | 8.312547826 | 8.52E-05    | ECM_GLYCOPROTEINS  | 1.117507652 | 1.165949234 |
| HYAL3   | 7.424075439 | 7.10865908  | 0.019266728 | 7.424075439 | 6.614234783 | 0.000597397 | ECM_REGULATORS     | 1.044370725 | 1.122439055 |
| IGFBP2  | 14.45163509 | 11.54559689 | 1.07E-20    | 14.45163509 | 12.29811739 | 2.81E-11    | ECM_GLYCOPROTEINS  | 1.251700992 | 1.175109541 |
| IGFBPL1 | 4.356285965 | 3.167931524 | 0.000169225 | 4.356285965 | 2.789078261 | 0.000420934 | ECM_GLYCOPROTEINS  | 1.37511999  | 1.561908831 |
| KAZALD1 | 10.26487018 | 7.396823854 | 8.09E-35    | 10.26487018 | 8.446686957 | 2.44E-05    | ECM_REGULATORS     | 1.387740249 | 1.215254008 |
| KCP     | 7.840698246 | 5.960061908 | 1.38E-09    | 7.840698246 | 5.01146087  | 3.90E-08    | ECM_GLYCOPROTEINS  | 1.315539732 | 1.564553421 |
| KERA    | 5.632940351 | 1.810448523 | 7.54E-45    | 5.632940351 | 3.165634783 | 0.001546419 | PROTEOGLYCANS      | 3.111350739 | 1.779403102 |
| LAMA1   | 9.717559649 | 7.358067872 | 1.05E-10    | 9.717559649 | 7.163873913 | 3.31E-07    | ECM_GLYCOPROTEINS  | 1.320667303 | 1.356467153 |
| LAMA1   | 9.717559649 | 7.358067872 | 1.05E-10    | 9.717559649 | 7.163873913 | 3.31E-07    | BASEMENT_MEMBRANES | 1.320667303 | 1.356467153 |
| LAMB1   | 13.6392807  | 12.22537678 | 1.15E-10    | 13.6392807  | 12.82277391 | 0.000349834 | ECM_GLYCOPROTEINS  | 1.115653198 | 1.063676299 |
| LAMB1   | 13.6392807  | 12.22537678 | 1.15E-10    | 13.6392807  | 12.82277391 | 0.000349834 | BASEMENT_MEMBRANES | 1.115653198 | 1.063676299 |
| LAMB4   | 3.924826316 | 3.03011628  | 0.000159716 | 3.924826316 | 2.650082609 | 0.003028    | ECM_GLYCOPROTEINS  | 1.295272509 | 1.481020366 |
| LAMB4   | 3.924826316 | 3.03011628  | 0.000159716 | 3.924826316 | 2.650082609 | 0.003028    | BASEMENT_MEMBRANES | 1.295272509 | 1.481020366 |
| LAMC1   | 13.53805263 | 12.7946557  | 2.37E-05    | 13.53805263 | 13.0882     | 0.022559955 | ECM_GLYCOPROTEINS  | 1.058102145 | 1.034370856 |
| LAMC1   | 13.53805263 | 12.7946557  | 2.37E-05    | 13.53805263 | 13.0882     | 0.022559955 | BASEMENT_MEMBRANES | 1.058102145 | 1.034370856 |
| LAMC3   | 10.18789123 | 7.775893365 | 1.37E-18    | 10.18789123 | 8.601456522 | 7.07E-05    | ECM_GLYCOPROTEINS  | 1.310189164 | 1.184437915 |
| LAMC3   | 10.18789123 | 7.775893365 | 1.37E-18    | 10.18789123 | 8.601456522 | 7.07E-05    | BASEMENT_MEMBRANES | 1.310189164 | 1.184437915 |
| LGALS12 | 4.006689474 | 3.127613413 | 0.004685601 | 4.006689474 | 2.579469565 | 0.001226089 | ECM_AFFILIATED     | 1.281069283 | 1.553299767 |
| LGALS14 | 1.104980702 | 0.450484171 | 7.45E-06    | 1.104980702 | 0.179104348 | 0.008532951 | ECM_AFFILIATED     | 2.452873539 | 6.169480055 |
| LGALS7  | 4.074945614 | 2.677273567 | 0.001197882 | 4.074945614 | 1.202713043 | 3.91E-08    | ECM_AFFILIATED     | 1.522050516 | 3.388127896 |
| LGI1    | 4.974812281 | 2.0159821   | 4.91E-17    | 4.974812281 | 3.152165217 | 0.006082818 | ECM_GLYCOPROTEINS  | 2.467686733 | 1.578220663 |
| LOX     | 10.75694211 | 9.513439971 | 8.63E-06    | 10.75694211 | 9.47846087  | 2.99E-05    | ECM_REGULATORS     | 1.130710042 | 1.134882789 |
| LOXL1   | 11.15344561 | 9.224470422 | 1.46E-13    | 11.15344561 | 9.456017391 | 5.92E-08    | ECM_REGULATORS     | 1.209115006 | 1.179507731 |
| LOXL2   | 11.82927544 | 10.16137143 | 6.49E-13    | 11.82927544 | 9.781604348 | 2.60E-09    | ECM_REGULATORS     | 1.164141624 | 1.209338981 |
| LOXL3   | 9.574342105 | 7.837987862 | 5.29E-19    | 9.574342105 | 8.189065217 | 7.16E-08    | ECM_REGULATORS     | 1.221530611 | 1.169161785 |
| MATN3   | 7.748415789 | 6.481585858 | 1.78E-05    | 7.748415789 | 5.832856522 | 1.74E-05    | ECM_GLYCOPROTEINS  | 1.195450613 | 1.328408433 |
| MATN4   | 5.881617544 | 2.576361151 | 1.57E-44    | 5.881617544 | 1.969578261 | 2.01E-07    | ECM_GLYCOPROTEINS  | 2.282916563 | 2.986231957 |
| MFAP2   | 13.34495965 | 9.097937277 | 2.90E-32    | 13.34495965 | 10.9845     | 5.79E-10    | ECM_GLYCOPROTEINS  | 1.466811569 | 1.21489004  |
| MMP10   | 6.455108772 | 4.682603375 | 0.000240637 | 6.455108772 | 4.30173913  | 0.004234195 | ECM_REGULATORS     | 1.378529902 | 1.500581178 |
| MMP14   | 14.00286316 | 12.93796569 | 3.53E-06    | 14.00286316 | 13.44623913 | 0.021650972 | ECM_REGULATORS     | 1.082307953 | 1.041396261 |
| MMP9    | 10.79390351 | 9.363519549 | 0.000142026 | 10.79390351 | 6.786030435 | 8.31E-12    | ECM_REGULATORS     | 1.152761358 | 1.59060641  |
| MXRA5   | 11.79075614 | 11.03768365 | 0.025742054 | 11.79075614 | 10.25813913 | 0.000188782 | ECM_GLYCOPROTEINS  | 1.068227403 | 1.149404974 |
| NCAN    | 3.561282456 | 2.460639233 | 0.018678711 | 3.561282456 | 0.897195652 | 2.17E-06    | PROTEOGLYCANS      | 1.447299713 | 3.969348767 |
| NELL1   | 5.942403509 | 3.314288399 | 1.14E-09    | 5.942403509 | 4.485578261 | 0.029882264 | ECM_GLYCOPROTEINS  | 1.792965124 | 1.324779808 |
| NELL2   | 9.188915789 | 7.833896836 | 0.000163949 | 9.188915789 | 7.346891304 | 0.000493055 | ECM_GLYCOPROTEINS  | 1.1729687   | 1.250721619 |
| NID2    | 10.27370351 | 9.201504602 | 3.07E-05    | 10.27370351 | 9.310926087 | 0.030002765 | BASEMENT_MEMBRANES | 1.116524303 | 1.103402971 |
| NID2    | 10.27370351 | 9.201504602 | 3.07E-05    | 10.27370351 | 9.310926087 | 0.030002765 | ECM_GLYCOPROTEINS  | 1.116524303 | 1.103402971 |

|          |             |             |             |             |             |             |                    |             |             |
|----------|-------------|-------------|-------------|-------------|-------------|-------------|--------------------|-------------|-------------|
| NTN3     | 4.326480702 | 2.098858236 | 2.16E-24    | 4.326480702 | 2.4246      | 1.20E-05    | BASEMENT_MEMBRANES | 2.061349656 | 1.784410089 |
| NTN3     | 4.326480702 | 2.098858236 | 2.16E-24    | 4.326480702 | 2.4246      | 1.20E-05    | ECM_GLYCOPROTEINS  | 2.061349656 | 1.784410089 |
| NTNG1    | 7.342021053 | 4.285669271 | 1.73E-14    | 7.342021053 | 5.066695652 | 3.65E-05    | BASEMENT_MEMBRANES | 1.71315624  | 1.449074813 |
| NTNG1    | 7.342021053 | 4.285669271 | 1.73E-14    | 7.342021053 | 5.066695652 | 3.65E-05    | ECM_GLYCOPROTEINS  | 1.71315624  | 1.449074813 |
| OGFOD2   | 9.278614035 | 9.067047661 | 0.016410923 | 9.278614035 | 8.88106087  | 0.003678405 | ECM_REGULATORS     | 1.023333546 | 1.044764153 |
| OTOG     | 4.2852      | 1.285782167 | 3.26E-33    | 4.2852      | 0.231069565 | 5.16E-15    | ECM_GLYCOPROTEINS  | 3.332757376 | 18.54506454 |
| P4HA1    | 12.14595439 | 11.13278637 | 1.81E-14    | 12.14595439 | 10.88210435 | 1.78E-10    | ECM_REGULATORS     | 1.091007587 | 1.116140224 |
| P4HA2    | 11.13148246 | 10.70100803 | 0.023755406 | 11.13148246 | 10.62626957 | 0.040650546 | ECM_REGULATORS     | 1.040227465 | 1.047543768 |
| P4HA3    | 7.25905614  | 6.373507766 | 0.000558647 | 7.25905614  | 5.673213043 | 0.00019525  | ECM_REGULATORS     | 1.138942072 | 1.279531737 |
| PCOLCE   | 13.6178614  | 10.57201325 | 5.43E-38    | 13.6178614  | 12.19323478 | 0.000123535 | ECM_GLYCOPROTEINS  | 1.288104837 | 1.116837463 |
| PI3      | 7.125812281 | 5.938276826 | 0.049579035 | 7.125812281 | 2.92613913  | 1.17E-09    | ECM_REGULATORS     | 1.199979807 | 2.435226749 |
| PLOD1    | 13.87145088 | 12.51400308 | 5.48E-26    | 13.87145088 | 12.6600087  | 1.09E-09    | ECM_REGULATORS     | 1.108474306 | 1.09569047  |
| PLOD2    | 11.74594211 | 11.15689563 | 0.013752664 | 11.74594211 | 10.61473478 | 1.92E-06    | ECM_REGULATORS     | 1.052796629 | 1.106569532 |
| PLOD3    | 11.99037193 | 11.68737523 | 0.030293077 | 11.99037193 | 11.29513913 | 8.39E-06    | ECM_REGULATORS     | 1.025925128 | 1.061551504 |
| PLXNA1   | 12.25405439 | 11.51655832 | 1.33E-05    | 12.25405439 | 10.75556522 | 1.12E-13    | ECM_AFFILIATED     | 1.064037887 | 1.139322215 |
| PLXNA3   | 11.19935614 | 10.73462003 | 0.00138999  | 11.19935614 | 10.34557826 | 5.73E-07    | ECM_AFFILIATED     | 1.043293206 | 1.082525873 |
| PLXNA4   | 8.678084211 | 6.935316922 | 2.49E-07    | 8.678084211 | 7.595526087 | 0.010902067 | ECM_AFFILIATED     | 1.251288774 | 1.142525759 |
| PROL1    | 1.191154386 | 0.619904631 | 0.015733932 | 1.191154386 | 0.102834783 | 0.007288506 | ECM_AFFILIATED     | 1.921512321 | 11.58318573 |
| PXDN     | 12.92707018 | 11.25729699 | 4.13E-12    | 12.92707018 | 11.6447087  | 0.000939572 | ECM_GLYCOPROTEINS  | 1.148328074 | 1.110123964 |
| REG3G    | 1.877796491 | 0.956257526 | 0.001418898 | 1.877796491 | 0.569430435 | 0.012908459 | ECM_AFFILIATED     | 1.963693293 | 3.297674969 |
| RSPO2    | 4.289392982 | 2.671057814 | 7.78E-06    | 4.289392982 | 1.904308696 | 6.84E-05    | ECM_GLYCOPROTEINS  | 1.605878001 | 2.252467256 |
| RSPO4    | 7.816745614 | 4.17764836  | 1.47E-23    | 7.816745614 | 3.29873913  | 2.09E-12    | ECM_GLYCOPROTEINS  | 1.871087497 | 2.369616179 |
| SEMA3A   | 9.466963158 | 6.917994008 | 5.95E-17    | 9.466963158 | 7.314426087 | 1.91E-07    | ECM_AFFILIATED     | 1.368454952 | 1.29428653  |
| SEMA3F   | 11.55513684 | 10.61948173 | 0.000107924 | 11.55513684 | 10.24145652 | 1.65E-07    | ECM_AFFILIATED     | 1.088107418 | 1.128270849 |
| SEMA4F   | 9.490584211 | 8.666278073 | 1.28E-09    | 9.490584211 | 8.48786087  | 1.76E-06    | ECM_AFFILIATED     | 1.095116511 | 1.118136166 |
| SEMA4G   | 9.053933333 | 8.497229655 | 0.030194132 | 9.053933333 | 7.531878261 | 3.53E-08    | ECM_AFFILIATED     | 1.065515904 | 1.202081741 |
| SEMA5B   | 7.854226316 | 6.885354046 | 0.002202062 | 7.854226316 | 7.134808696 | 0.039862658 | ECM_AFFILIATED     | 1.140714953 | 1.100832083 |
| SEMA6A   | 10.98689649 | 9.584409012 | 1.22E-07    | 10.98689649 | 9.945443478 | 0.000425377 | ECM_AFFILIATED     | 1.146330095 | 1.104716599 |
| SEMA6C   | 10.98434386 | 8.359419559 | 9.78E-53    | 10.98434386 | 9.628904348 | 4.27E-05    | ECM_AFFILIATED     | 1.314007962 | 1.140767782 |
| SEMA7A   | 9.148052632 | 8.479781438 | 0.002508096 | 9.148052632 | 7.6902      | 3.26E-09    | ECM_AFFILIATED     | 1.078807596 | 1.189572785 |
| SERPINE2 | 11.35175965 | 10.73760217 | 0.047278163 | 11.35175965 | 10.41669565 | 0.00592546  | ECM_REGULATORS     | 1.057196893 | 1.089765894 |
| SERPINH1 | 14.72549649 | 12.68675741 | 8.49E-29    | 14.72549649 | 13.41794348 | 4.94E-08    | ECM_REGULATORS     | 1.1606982   | 1.097448094 |
| SLIT1    | 7.813319298 | 5.421693615 | 1.34E-09    | 7.813319298 | 4.235826087 | 1.39E-11    | ECM_GLYCOPROTEINS  | 1.441121512 | 1.844579815 |
| TECTA    | 6.280112281 | 5.16543001  | 6.75E-09    | 6.280112281 | 5.562973913 | 0.00132338  | ECM_GLYCOPROTEINS  | 1.215796607 | 1.128912768 |
| TGFBI    | 13.42976842 | 12.29033827 | 1.90E-05    | 13.42976842 | 11.8961     | 8.96E-05    | ECM_GLYCOPROTEINS  | 1.092709421 | 1.128921951 |
| THBS3    | 11.15468772 | 9.852980566 | 9.50E-22    | 11.15468772 | 10.62878261 | 0.020141688 | ECM_GLYCOPROTEINS  | 1.132113034 | 1.049479336 |
| TLL2     | 7.168792982 | 4.899537795 | 3.06E-21    | 7.168792982 | 5.41983913  | 7.05E-06    | ECM_REGULATORS     | 1.463156992 | 1.32269479  |
| TMPRSS15 | 3.112919298 | 0.988431333 | 4.66E-20    | 3.112919298 | 0.354991304 | 1.81E-06    | ECM_REGULATORS     | 3.149353117 | 8.769001551 |
| TNN      | 5.674526316 | 4.71568373  | 0.001548125 | 5.674526316 | 3.413686957 | 5.39E-05    | ECM_GLYCOPROTEINS  | 1.203330554 | 1.662286668 |
| VCAN     | 13.16881228 | 11.66940803 | 1.53E-06    | 13.16881228 | 11.1748087  | 7.96E-06    | PROTEOGLYCANS      | 1.128490172 | 1.17843738  |
| WIF1     | 8.586461404 | 3.310739837 | 1.73E-31    | 8.586461404 | 6.707052174 | 0.024231345 | SECRETED_FACTORS   | 2.593517409 | 1.280213897 |
| WNT1     | 1.009615789 | 0.69683278  | 0.015227243 | 1.009615789 | 0.480969565 | 0.038646589 | SECRETED_FACTORS   | 1.448863799 | 2.099126145 |
| WNT10A   | 8.242982456 | 5.956999712 | 4.61E-10    | 8.242982456 | 4.16966087  | 5.17E-12    | SECRETED_FACTORS   | 1.383747332 | 1.976895175 |
| WNT10B   | 5.61484386  | 4.228883337 | 5.53E-08    | 5.61484386  | 3.3326      | 1.49E-07    | SECRETED_FACTORS   | 1.32773676  | 1.684823819 |
| WNT11    | 9.542180702 | 5.989914305 | 1.25E-28    | 9.542180702 | 7.272926087 | 6.05E-09    | SECRETED_FACTORS   | 1.593041272 | 1.31201398  |
| WNT16    | 4.596542105 | 2.57407883  | 2.05E-15    | 4.596542105 | 2.654178261 | 0.001484397 | SECRETED_FACTORS   | 1.785703705 | 1.731813636 |

|               |             |             |             |             |             |             |                   |             |             |
|---------------|-------------|-------------|-------------|-------------|-------------|-------------|-------------------|-------------|-------------|
| <b>WNT3A</b>  | 3.784238596 | 2.81083373  | 0.005595722 | 3.784238596 | 2.221704348 | 0.000467444 | SECRETED_FACTORS  | 1.346304677 | 1.703304312 |
| <b>WNT6</b>   | 6.889745614 | 3.82567814  | 4.14E-27    | 6.889745614 | 5.785473913 | 0.002574769 | SECRETED_FACTORS  | 1.800921395 | 1.190869705 |
| <b>VWA5B1</b> | 2.958445614 | 1.904118313 | 0.000372085 | 2.958445614 | 1.954904348 | 0.038024275 | ECM_GLYCOPROTEINS | 1.553708924 | 1.513345457 |
| <b>VWCE</b>   | 8.284540351 | 5.819285762 | 4.78E-18    | 8.284540351 | 6.976134783 | 0.00098745  | ECM_GLYCOPROTEINS | 1.423635252 | 1.187554514 |
| <b>ZP3</b>    | 8.238331579 | 7.794092627 | 0.024350326 | 8.238331579 | 7.57853913  | 0.008767957 | ECM_GLYCOPROTEINS | 1.056996879 | 1.087060638 |
| <b>ZP4</b>    | 0.940426316 | 0.359800355 | 2.55E-05    | 0.940426316 | 0.032817391 | 0.001991142 | ECM_GLYCOPROTEINS | 2.613744826 | 28.65633978 |
| <b>ZPLD1</b>  | 3.399714035 | 2.282818763 | 7.36E-05    | 3.399714035 | 1.582713043 | 0.000831966 | ECM_GLYCOPROTEINS | 1.489261474 | 2.148029328 |

**Supplemental Table 5. Matrisome signatures of different clusters**

| Digestive cluster |                      | Lung cluster |                      | Brain cluster |                      | Ovary-uterine cluster |                      | Hepato-biliary |                      | Kidney cluster |                      |
|-------------------|----------------------|--------------|----------------------|---------------|----------------------|-----------------------|----------------------|----------------|----------------------|----------------|----------------------|
| Gene              | Combined fold change | Gene         | Combined fold change | Gene          | Combined fold change | Gene                  | Combined fold change | Gene           | Combined fold change | Gene           | Combined fold change |
| CST4              | 5,816412831          | CST4         | 10,37565221          | TGM5          | 2,069935439          | LRG1                  | 14,55199482          | TINAG          | 7,303781726          | CTSD           | 1,073098482          |
| FGF19             | 4,170582035          | CSTL1        | 9,67495932           | TIMP4         | 1,868066145          | HAPLN1                | 8,545151079          | REG1A          | 2,963340304          | LAMA5          | 1,044841559          |
| MMP8              | 3,443192746          | FGF19        | 8,983472648          | IGFBP1        | 1,791302152          | ARTN                  | 7,358526882          | MUC13          | 1,859517497          |                |                      |
| CSTL1             | 2,977192129          | CST1         | 2,649905721          | C1QL1         | 1,673409478          | FGF3                  | 6,527080327          | TGM3           | 1,769397839          |                |                      |
| CST1              | 2,691668639          | SERPINB4     | 2,487778839          | MASP1         | 1,585600468          | AMH                   | 4,684480489          | CCL20          | 1,408857744          |                |                      |
| CSF2              | 2,400425804          | ANXA10       | 2,309582755          | GPC2          | 1,482765269          | CSTL1                 | 4,00200292           | VWA7           | 1,164017634          |                |                      |
| COL10A1           | 2,26642653           | ZPLD1        | 2,223979297          | ADAMTS6       | 1,461700642          | MMP11                 | 3,578267027          | ADAMTS10       | 1,1328242            |                |                      |
| MMP3              | 1,946712885          | EPYC         | 2,213715336          | CRISPLD1      | 1,353343022          | HYAL3                 | 3,458728155          | PLOD3          | 1,068117684          |                |                      |
| WNT2              | 1,853459415          | MMP13        | 2,182630583          | SRPX          | 1,340578953          | MFAP2                 | 3,376239287          |                |                      |                |                      |
| CXCL5             | 1,646579182          | IBSP         | 2,142987629          | NTN1          | 1,335922689          | MUC16                 | 2,572531902          |                |                      |                |                      |
| MMP7              | 1,643331075          | PRSS1        | 2,115572254          | FGF11         | 1,27870529           | RSPO4                 | 2,452951258          |                |                      |                |                      |
| SERPINB5          | 1,623642153          | MMP12        | 1,81380209           | C1QTNF5       | 1,230127061          | SEMA4D                | 2,33825582           |                |                      |                |                      |
| MMP10             | 1,604978635          | PRSS2        | 1,800954007          | LOXL3         | 1,22321027           | IGFBP2                | 2,008653858          |                |                      |                |                      |
| CXCL3             | 1,58732163           | MMP10        | 1,726364082          | TNC           | 1,214685107          | MUC1                  | 1,785030875          |                |                      |                |                      |
| MMP1              | 1,534017938          | COL11A1      | 1,715666136          | EFEMP1        | 1,196853558          | MUC5AC                | 1,723016725          |                |                      |                |                      |
| CCL20             | 1,532803253          | CCL7         | 1,679685989          | ANGPTL2       | 1,1946299            | CILP2                 | 1,69371656           |                |                      |                |                      |
| CXCL6             | 1,478013781          | MMP1         | 1,637823764          | ELN           | 1,183893823          | LAMC2                 | 1,660916509          |                |                      |                |                      |
| CXCL1             | 1,475853185          | MMP8         | 1,580519716          | VCAN          | 1,170901467          | ANXA3                 | 1,61296351           |                |                      |                |                      |
| ACAN              | 1,474337055          | COL10A1      | 1,544116239          | SPARC         | 1,170833154          | SLPI                  | 1,577217614          |                |                      |                |                      |
| CXCL8             | 1,378112685          | CCL26        | 1,516960294          | C1QTNF1       | 1,15460882           | COL18A1               | 1,526954047          |                |                      |                |                      |
| CXCL11            | 1,338940378          | CXCL13       | 1,507504294          | MATN3         | 1,150622717          | AGRN                  | 1,50713923           |                |                      |                |                      |
| ADAMTS12          | 1,315657621          | GREM1        | 1,453197639          | ADAMTS9       | 1,144040309          | LAMA5                 | 1,500750601          |                |                      |                |                      |
| MMP11             | 1,3037066            | COL17A1      | 1,451408238          | MATN2         | 1,143677327          | WNT10A                | 1,494924626          |                |                      |                |                      |
| ADAMTS14          | 1,244929158          | WNT16        | 1,446531275          | WNT5A         | 1,13240246           | MMP15                 | 1,425556411          |                |                      |                |                      |
| CTSV              | 1,236292597          | MMP11        | 1,432887947          | CTSO          | 1,096951535          | MUC20                 | 1,421945349          |                |                      |                |                      |
| F12               | 1,217448747          | CILP2        | 1,403329906          | CSF1          | 1,094019679          | BMP3                  | 1,388598037          |                |                      |                |                      |
| LAMC2             | 1,217208795          | VWDE         | 1,370886463          | ADAM17        | 1,067951971          | SEMA3F                | 1,383351863          |                |                      |                |                      |
| PODNL1            | 1,188236036          | CST2         | 1,360548433          | A2M           | 1,065072484          | KAZALD1               | 1,340811047          |                |                      |                |                      |
| ADAMTS2           | 1,165985642          | COCH         | 1,356433261          | PLXNA3        | 1,056452449          | ST14                  | 1,324738441          |                |                      |                |                      |
| MMP9              | 1,157404703          | ADAMDEC1     | 1,3298259            |               |                      | PLXNB2                | 1,305198201          |                |                      |                |                      |
| COL12A1           | 1,142748876          | CTHRC1       | 1,310976114          |               |                      | EMID1                 | 1,259146668          |                |                      |                |                      |
| TGFB1             | 1,140801814          | SPP1         | 1,284215089          |               |                      | MUC4                  | 1,219212887          |                |                      |                |                      |
| COL1A1            | 1,137570347          | WNT10B       | 1,272047636          |               |                      | ESM1                  | 1,210342903          |                |                      |                |                      |
| LOXL2             | 1,122603336          | COL24A1      | 1,251770579          |               |                      | HAPLN3                | 1,206810036          |                |                      |                |                      |
| COL5A2            | 1,120472117          | PLXNB3       | 1,249061648          |               |                      | ZP3                   | 1,199883988          |                |                      |                |                      |
| COL5A1            | 1,118609537          | ADAM12       | 1,242060984          |               |                      | CXCL3                 | 1,192168622          |                |                      |                |                      |
| COL1A2            | 1,086289128          | ADAMTS14     | 1,235560638          |               |                      | LGALS9                | 1,178857422          |                |                      |                |                      |
| COL4A1            | 1,083935558          | PODNL1       | 1,232095289          |               |                      | COL9A2                | 1,166568295          |                |                      |                |                      |
| PLOD3             | 1,083291096          | WISP1        | 1,217175351          |               |                      | FRAS1                 | 1,144805213          |                |                      |                |                      |



|       |             |          |             |  |  |        |             |  |  |  |
|-------|-------------|----------|-------------|--|--|--------|-------------|--|--|--|
| SPON2 | 1,079291706 | MMP9     | 1,20089387  |  |  | LOXL1  | 1,131899739 |  |  |  |
|       |             | EGLN3    | 1,19337969  |  |  | CCL28  | 1,126049193 |  |  |  |
|       |             | SRPX2    | 1,193212449 |  |  | VWA1   | 1,124658555 |  |  |  |
|       |             | P4HA3    | 1,192060312 |  |  | NGLY1  | 1,097286299 |  |  |  |
|       |             | MMP7     | 1,177534434 |  |  | SEMA4F | 1,022703035 |  |  |  |
|       |             | WNT10A   | 1,176247712 |  |  |        |             |  |  |  |
|       |             | FNDC1    | 1,175434386 |  |  |        |             |  |  |  |
|       |             | ADAMTS12 | 1,17205896  |  |  |        |             |  |  |  |
|       |             | LAMB3    | 1,170648769 |  |  |        |             |  |  |  |
|       |             | LGI2     | 1,170625615 |  |  |        |             |  |  |  |
|       |             | PLAU     | 1,166122499 |  |  |        |             |  |  |  |
|       |             | WNT3     | 1,1661008   |  |  |        |             |  |  |  |
|       |             | CILP     | 1,165217713 |  |  |        |             |  |  |  |
|       |             | MFAP2    | 1,156085096 |  |  |        |             |  |  |  |
|       |             | MUC20    | 1,155164452 |  |  |        |             |  |  |  |
|       |             | POSTN    | 1,151044532 |  |  |        |             |  |  |  |
|       |             | ADAM28   | 1,149478943 |  |  |        |             |  |  |  |
|       |             | THBS2    | 1,148757589 |  |  |        |             |  |  |  |
|       |             | SULF1    | 1,142460507 |  |  |        |             |  |  |  |
|       |             | C1QTNF6  | 1,139152338 |  |  |        |             |  |  |  |
|       |             | ADAMTSL5 | 1,135466866 |  |  |        |             |  |  |  |
|       |             | SDC1     | 1,128634632 |  |  |        |             |  |  |  |
|       |             | COL1A1   | 1,128165322 |  |  |        |             |  |  |  |
|       |             | COL3A1   | 1,12672845  |  |  |        |             |  |  |  |
|       |             | IGFBP3   | 1,115673357 |  |  |        |             |  |  |  |
|       |             | SEMA4B   | 1,114755066 |  |  |        |             |  |  |  |
|       |             | HTRA3    | 1,114275076 |  |  |        |             |  |  |  |
|       |             | COL5A2   | 1,114219404 |  |  |        |             |  |  |  |
|       |             | ST14     | 1,114143251 |  |  |        |             |  |  |  |
|       |             | COL5A1   | 1,113021104 |  |  |        |             |  |  |  |
|       |             | HAPLN3   | 1,111943061 |  |  |        |             |  |  |  |
|       |             | CXCL10   | 1,105090921 |  |  |        |             |  |  |  |
|       |             | MXRA5    | 1,095321392 |  |  |        |             |  |  |  |
|       |             | PLOD2    | 1,094946491 |  |  |        |             |  |  |  |
|       |             | WNT5B    | 1,092041069 |  |  |        |             |  |  |  |
|       |             | TNC      | 1,087190617 |  |  |        |             |  |  |  |
|       |             | LOXL1    | 1,082216238 |  |  |        |             |  |  |  |
|       |             | HPSE     | 1,077400305 |  |  |        |             |  |  |  |
|       |             | VCAN     | 1,07347391  |  |  |        |             |  |  |  |
|       |             | P4HA1    | 1,070209738 |  |  |        |             |  |  |  |
|       |             | COL1A2   | 1,070005472 |  |  |        |             |  |  |  |
|       |             | CTSK     | 1,063231259 |  |  |        |             |  |  |  |
|       |             | MMP14    | 1,063196306 |  |  |        |             |  |  |  |
|       |             | SERPINH1 | 1,061475747 |  |  |        |             |  |  |  |
|       |             | CRELD2   | 1,053657911 |  |  |        |             |  |  |  |
|       |             | PLAT     | 1,051149615 |  |  |        |             |  |  |  |

|  |  |        |             |  |  |  |  |  |  |  |  |
|--|--|--------|-------------|--|--|--|--|--|--|--|--|
|  |  | CSTB   | 1,049679595 |  |  |  |  |  |  |  |  |
|  |  | SEMA4C | 1,048932589 |  |  |  |  |  |  |  |  |
|  |  | LMAN1  | 1,02849176  |  |  |  |  |  |  |  |  |
|  |  | AGRN   | 1,026383196 |  |  |  |  |  |  |  |  |

Combined fold change is the average of total fold changes in each cohort. Each total fold change is the *per-gene* average of the fold change difference in the tumor of interest vs. respective healthy donors and rest of the Pan-Cancer cohort.















|                |   |   |   |   |   |   |   |   |   |   |   |   |   |   |   |   |   |   |   |   |   |   |   |   |   |   |   |   |
|----------------|---|---|---|---|---|---|---|---|---|---|---|---|---|---|---|---|---|---|---|---|---|---|---|---|---|---|---|---|
| RARA::IGFBP4   | 0 | 0 | 0 | 0 | 0 | 0 | 0 | 0 | 0 | 0 | 0 | 1 | 0 | 0 | 0 | 0 | 0 | 0 | 0 | 0 | 0 | 0 | 0 | 0 | 0 | 0 | 0 | 0 |
| RARA::LGALS8   | 0 | 0 | 1 | 0 | 0 | 0 | 0 | 0 | 0 | 0 | 0 | 0 | 0 | 0 | 0 | 0 | 0 | 0 | 0 | 0 | 0 | 0 | 0 | 0 | 0 | 0 | 0 | 0 |
| RARA::LOXL3    | 0 | 0 | 0 | 0 | 0 | 0 | 0 | 0 | 0 | 0 | 0 | 0 | 0 | 0 | 0 | 0 | 0 | 0 | 0 | 1 | 0 | 0 | 0 | 0 | 0 | 0 | 0 | 0 |
| RARA::SDC1     | 0 | 0 | 0 | 0 | 0 | 0 | 0 | 0 | 0 | 0 | 0 | 0 | 0 | 0 | 0 | 1 | 0 | 0 | 0 | 0 | 0 | 0 | 0 | 0 | 0 | 0 | 0 | 0 |
| RARA::SEMA3F   | 0 | 0 | 1 | 0 | 0 | 0 | 0 | 0 | 0 | 0 | 0 | 0 | 0 | 0 | 0 | 0 | 0 | 0 | 0 | 0 | 0 | 0 | 0 | 0 | 0 | 0 | 0 | 0 |
| RARA::SEMA4B   | 0 | 0 | 0 | 0 | 0 | 0 | 0 | 0 | 0 | 0 | 0 | 0 | 0 | 0 | 0 | 1 | 0 | 0 | 0 | 0 | 0 | 0 | 0 | 0 | 0 | 0 | 0 | 0 |
| RARA::SERPINE1 | 0 | 0 | 0 | 0 | 0 | 0 | 0 | 0 | 1 | 0 | 0 | 0 | 0 | 0 | 0 | 0 | 0 | 0 | 0 | 0 | 0 | 0 | 0 | 0 | 0 | 0 | 0 | 0 |
| RARA::TGM2     | 0 | 0 | 0 | 0 | 0 | 0 | 0 | 0 | 0 | 0 | 0 | 0 | 0 | 0 | 0 | 0 | 0 | 0 | 0 | 0 | 1 | 0 | 0 | 0 | 0 | 0 | 0 | 0 |
| RARA::TNC      | 0 | 0 | 0 | 0 | 0 | 0 | 0 | 0 | 1 | 0 | 0 | 0 | 0 | 0 | 0 | 0 | 0 | 0 | 0 | 0 | 0 | 0 | 0 | 0 | 0 | 0 | 0 | 0 |
| RARA::WNT9A    | 0 | 0 | 1 | 0 | 0 | 0 | 0 | 0 | 0 | 0 | 0 | 0 | 0 | 0 | 0 | 0 | 0 | 0 | 0 | 0 | 0 | 0 | 0 | 0 | 0 | 0 | 0 | 0 |
| RARA::VWA1     | 0 | 0 | 0 | 0 | 0 | 0 | 0 | 0 | 0 | 0 | 0 | 0 | 0 | 0 | 0 | 1 | 0 | 0 | 0 | 0 | 0 | 0 | 0 | 0 | 0 | 0 | 0 | 0 |
| RARA::ZFP91    | 0 | 0 | 0 | 0 | 0 | 0 | 0 | 0 | 0 | 0 | 0 | 0 | 1 | 0 | 0 | 0 | 0 | 0 | 0 | 0 | 0 | 0 | 0 | 0 | 0 | 0 | 0 | 0 |
| RARB::COL13A1  | 0 | 0 | 0 | 0 | 0 | 0 | 0 | 0 | 1 | 0 | 0 | 0 | 0 | 0 | 0 | 0 | 0 | 0 | 0 | 0 | 0 | 0 | 0 | 0 | 0 | 0 | 0 | 0 |
| RARB::COL8A1   | 0 | 0 | 0 | 0 | 0 | 0 | 1 | 0 | 0 | 0 | 0 | 0 | 0 | 0 | 0 | 0 | 0 | 0 | 0 | 0 | 0 | 0 | 0 | 0 | 0 | 0 | 0 | 0 |
| RARB::CST2     | 0 | 0 | 0 | 0 | 0 | 0 | 1 | 0 | 0 | 0 | 0 | 0 | 0 | 0 | 0 | 0 | 0 | 0 | 0 | 0 | 0 | 0 | 0 | 0 | 0 | 0 | 0 | 0 |
| RARB::ESM1     | 0 | 0 | 0 | 0 | 0 | 0 | 0 | 0 | 0 | 0 | 0 | 0 | 0 | 0 | 0 | 0 | 0 | 0 | 0 | 1 | 0 | 0 | 0 | 0 | 0 | 0 | 0 | 0 |
| RARB::FGF1     | 0 | 0 | 0 | 0 | 0 | 0 | 0 | 0 | 0 | 0 | 0 | 0 | 0 | 0 | 0 | 0 | 0 | 0 | 0 | 1 | 0 | 0 | 0 | 0 | 0 | 0 | 0 | 0 |
| RARB::LOXL1    | 0 | 0 | 0 | 0 | 0 | 0 | 0 | 0 | 1 | 0 | 0 | 0 | 0 | 0 | 0 | 0 | 0 | 0 | 0 | 0 | 0 | 0 | 0 | 0 | 0 | 0 | 0 | 0 |
| RARB::MMRN2    | 1 | 0 | 0 | 0 | 0 | 0 | 0 | 0 | 0 | 0 | 0 | 0 | 0 | 0 | 0 | 0 | 0 | 0 | 0 | 0 | 0 | 0 | 0 | 0 | 0 | 0 | 0 | 0 |
| RARB::PAMR1    | 0 | 0 | 0 | 0 | 0 | 0 | 0 | 0 | 0 | 0 | 1 | 0 | 0 | 0 | 0 | 0 | 0 | 0 | 0 | 0 | 0 | 0 | 0 | 0 | 0 | 0 | 0 | 0 |
| RARB::SRPX     | 1 | 0 | 0 | 0 | 0 | 0 | 0 | 0 | 0 | 0 | 0 | 0 | 0 | 0 | 0 | 0 | 0 | 0 | 0 | 0 | 0 | 0 | 0 | 0 | 0 | 0 | 0 | 0 |
| RARB::WNT5A    | 0 | 0 | 0 | 0 | 0 | 0 | 1 | 0 | 0 | 0 | 0 | 0 | 0 | 0 | 0 | 0 | 1 | 0 | 0 | 0 | 0 | 0 | 0 | 0 | 0 | 0 | 0 | 0 |
| RARG::ADAMTSL5 | 0 | 0 | 0 | 0 | 0 | 0 | 0 | 0 | 0 | 0 | 0 | 0 | 0 | 0 | 0 | 0 | 0 | 0 | 0 | 0 | 0 | 0 | 1 | 0 | 0 | 0 | 0 | 0 |
| RARG::CST6     | 0 | 0 | 0 | 0 | 0 | 0 | 0 | 0 | 0 | 0 | 0 | 0 | 0 | 0 | 0 | 0 | 0 | 0 | 0 | 0 | 0 | 0 | 0 | 0 | 0 | 1 | 0 | 0 |
| RARG::CSTA     | 0 | 0 | 0 | 1 | 0 | 0 | 0 | 0 | 0 | 0 | 0 | 0 | 0 | 0 | 0 | 0 | 1 | 0 | 0 | 0 | 0 | 0 | 0 | 0 | 0 | 0 | 0 | 0 |
| RARG::ELN      | 0 | 0 | 0 | 0 | 0 | 0 | 0 | 0 | 0 | 0 | 0 | 0 | 0 | 0 | 0 | 0 | 0 | 0 | 0 | 1 | 0 | 0 | 0 | 0 | 0 | 0 | 0 | 0 |
| RARG::LAMA5    | 0 | 0 | 0 | 0 | 0 | 0 | 0 | 0 | 0 | 0 | 0 | 0 | 0 | 0 | 0 | 0 | 0 | 0 | 0 | 0 | 0 | 0 | 0 | 0 | 0 | 0 | 1 | 0 |
| RARG::LGI4     | 0 | 0 | 0 | 0 | 0 | 0 | 0 | 0 | 0 | 0 | 1 | 0 | 0 | 0 | 0 | 0 | 0 | 0 | 0 | 0 | 0 | 0 | 0 | 0 | 0 | 0 | 0 | 0 |
| RARG::LOXL1    | 0 | 0 | 0 | 0 | 0 | 0 | 0 | 0 | 0 | 0 | 0 | 0 | 0 | 0 | 0 | 0 | 1 | 1 | 0 | 0 | 0 | 0 | 0 | 0 | 0 | 1 | 0 | 0 |
| RARG::LOXL3    | 0 | 0 | 0 | 0 | 0 | 0 | 0 | 1 | 0 | 0 | 0 | 0 | 0 | 0 | 0 | 0 | 0 | 0 | 0 | 1 | 0 | 0 | 0 | 0 | 0 | 0 | 0 | 0 |
| RARG::MMP14    | 0 | 0 | 0 | 0 | 0 | 0 | 0 | 0 | 0 | 0 | 0 | 0 | 0 | 0 | 0 | 0 | 0 | 0 | 0 | 0 | 0 | 0 | 0 | 0 | 1 | 0 | 0 | 0 |
| RARG::PLXNA3   | 0 | 0 | 0 | 0 | 0 | 0 | 0 | 0 | 0 | 0 | 0 | 0 | 0 | 0 | 0 | 0 | 0 | 0 | 0 | 0 | 0 | 0 | 0 | 0 | 0 | 0 | 1 | 0 |
| RARG::PLXNB2   | 0 | 1 | 0 | 0 | 0 | 0 | 0 | 0 | 1 | 0 | 0 | 0 | 0 | 0 | 0 | 0 | 0 | 0 | 0 | 0 | 0 | 0 | 0 | 0 | 0 | 0 | 0 | 0 |
| RARG::PLXND1   | 0 | 0 | 0 | 0 | 0 | 0 | 0 | 0 | 0 | 0 | 1 | 0 | 0 | 0 | 0 | 0 | 0 | 0 | 0 | 0 | 0 | 0 | 0 | 0 | 0 | 0 | 1 | 0 |
| RARG::PODNL1   | 0 | 0 | 0 | 0 | 0 | 1 | 0 | 0 | 0 | 0 | 0 | 0 | 0 | 0 | 0 | 0 | 0 | 0 | 0 | 0 | 0 | 0 | 0 | 0 | 0 | 0 | 0 | 0 |
| RARG::SDC1     | 0 | 1 | 0 | 0 | 0 | 0 | 0 | 0 | 0 | 0 | 0 | 0 | 0 | 0 | 0 | 0 | 0 | 0 | 0 | 0 | 0 | 0 | 0 | 0 | 0 | 0 | 0 | 0 |
| RARG::SEMA3F   | 0 | 0 | 0 | 1 | 0 | 0 | 0 | 0 | 0 | 0 | 0 | 0 | 0 | 0 | 0 | 0 | 0 | 0 | 0 | 0 | 0 | 0 | 0 | 0 | 0 | 0 | 0 | 0 |
| RARG::SEMA4A   | 0 | 1 | 0 | 0 | 0 | 0 | 0 | 0 | 0 | 0 | 0 | 0 | 0 | 0 | 0 | 0 | 0 | 0 | 0 | 0 | 0 | 0 | 0 | 0 | 0 | 0 | 0 | 0 |
| RARG::SERPINB8 | 0 | 0 | 0 | 1 | 0 | 0 | 0 | 0 | 0 | 0 | 0 | 0 | 0 | 0 | 0 | 0 | 0 | 0 | 0 | 0 | 0 | 0 | 0 | 0 | 0 | 0 | 0 | 0 |
| RARG::SPOCK1   | 1 | 0 | 0 | 0 | 0 | 0 | 0 | 0 | 0 | 0 | 0 | 0 | 0 | 0 | 0 | 0 | 0 | 0 | 0 | 0 | 0 | 0 | 0 | 0 | 0 | 0 | 0 | 0 |
| RARG::ST14     | 0 | 0 | 0 | 0 | 0 | 0 | 0 | 0 | 0 | 0 | 0 | 0 | 0 | 0 | 0 | 0 | 1 | 0 | 0 | 0 | 0 | 0 | 0 | 0 | 0 | 0 | 0 | 0 |
| RARG::THBS3    | 0 | 0 | 0 | 0 | 0 | 0 | 0 | 0 | 0 | 0 | 0 | 0 | 0 | 0 | 0 | 0 | 0 | 0 | 0 | 0 | 0 | 0 | 0 | 0 | 0 | 0 | 0 | 1 |
| RARG::WNT5A    | 0 | 0 | 0 | 0 | 0 | 0 | 0 | 0 | 0 | 0 | 0 | 0 | 0 | 0 | 0 | 0 | 0 | 0 | 0 | 0 | 0 | 0 | 0 | 0 | 0 | 0 | 1 | 0 |
| RBPJ::LGALS1   | 0 | 0 | 0 | 0 | 0 | 0 | 0 | 0 | 0 | 0 | 0 | 0 | 0 | 0 | 0 | 0 | 0 | 0 | 0 | 0 | 0 | 0 | 1 | 0 | 0 | 0 | 0 | 0 |
| RBPJ::LGI2     | 0 | 0 | 0 | 0 | 0 | 0 | 0 | 0 | 0 | 0 | 0 | 0 | 0 | 0 | 0 | 0 | 1 | 0 | 0 | 0 | 0 | 0 | 0 | 0 | 0 | 0 | 0 | 0 |
| RBPJ::NELL2    | 0 | 0 | 0 | 0 | 0 | 0 | 0 | 0 | 0 | 0 | 0 | 0 | 0 | 0 | 0 | 0 | 0 | 0 | 0 | 1 | 0 | 0 | 0 | 0 | 0 | 0 | 0 | 0 |











|                  |   |   |   |   |   |   |   |   |   |   |   |   |   |   |   |   |   |   |   |   |   |   |   |   |   |   |   |   |   |   |
|------------------|---|---|---|---|---|---|---|---|---|---|---|---|---|---|---|---|---|---|---|---|---|---|---|---|---|---|---|---|---|---|
| SREBF2::PLXNB2   | 0 | 0 | 0 | 0 | 0 | 0 | 0 | 0 | 0 | 0 | 0 | 0 | 0 | 0 | 0 | 0 | 0 | 0 | 0 | 0 | 0 | 0 | 0 | 0 | 0 | 0 | 1 | 0 | 0 |   |
| SRF::ANGPT2      | 0 | 0 | 0 | 0 | 0 | 0 | 1 | 0 | 0 | 0 | 0 | 0 | 0 | 0 | 0 | 0 | 0 | 0 | 0 | 0 | 0 | 0 | 0 | 0 | 0 | 0 | 0 | 0 | 0 | 0 |
| STAT5A::A2M      | 0 | 0 | 0 | 0 | 0 | 0 | 0 | 0 | 0 | 0 | 0 | 0 | 0 | 1 | 0 | 0 | 0 | 0 | 0 | 0 | 0 | 0 | 0 | 0 | 0 | 0 | 0 | 0 | 0 | 0 |
| STAT5A::BMP4     | 0 | 0 | 0 | 0 | 0 | 0 | 0 | 0 | 0 | 0 | 0 | 0 | 0 | 0 | 0 | 0 | 0 | 0 | 0 | 0 | 0 | 0 | 1 | 0 | 0 | 0 | 0 | 0 | 0 | 0 |
| STAT5A::C1QTNF1  | 0 | 0 | 0 | 0 | 0 | 1 | 0 | 0 | 0 | 0 | 0 | 0 | 0 | 0 | 0 | 0 | 0 | 0 | 0 | 0 | 0 | 0 | 0 | 0 | 0 | 0 | 0 | 0 | 0 | 0 |
| STAT5A::C1QTNF5  | 0 | 0 | 0 | 0 | 0 | 0 | 0 | 0 | 0 | 0 | 0 | 1 | 0 | 0 | 0 | 0 | 0 | 0 | 0 | 0 | 0 | 0 | 0 | 0 | 0 | 0 | 0 | 0 | 0 | 0 |
| STAT5A::CCL22    | 0 | 0 | 0 | 1 | 0 | 0 | 0 | 0 | 0 | 0 | 0 | 0 | 0 | 0 | 0 | 0 | 0 | 0 | 0 | 0 | 0 | 0 | 0 | 0 | 0 | 0 | 0 | 0 | 0 | 0 |
| STAT5A::CCL5     | 0 | 0 | 0 | 0 | 0 | 0 | 0 | 0 | 1 | 0 | 0 | 0 | 0 | 0 | 0 | 0 | 0 | 0 | 0 | 0 | 0 | 0 | 0 | 0 | 0 | 0 | 0 | 0 | 0 | 0 |
| STAT5A::CLEC4A   | 0 | 0 | 0 | 0 | 0 | 0 | 0 | 0 | 0 | 0 | 0 | 0 | 0 | 0 | 0 | 0 | 0 | 0 | 0 | 0 | 0 | 0 | 0 | 0 | 0 | 0 | 1 | 0 | 0 | 0 |
| STAT5A::COL8A2   | 0 | 0 | 0 | 0 | 0 | 0 | 0 | 0 | 1 | 0 | 0 | 0 | 0 | 0 | 0 | 0 | 0 | 0 | 0 | 0 | 0 | 0 | 0 | 0 | 0 | 0 | 0 | 0 | 0 | 0 |
| STAT5A::CXCL11   | 0 | 0 | 0 | 0 | 0 | 0 | 1 | 0 | 0 | 0 | 0 | 0 | 0 | 0 | 0 | 0 | 0 | 0 | 0 | 0 | 0 | 0 | 0 | 1 | 0 | 0 | 0 | 0 | 0 | 0 |
| STAT5A::CXCL6    | 0 | 0 | 0 | 0 | 0 | 0 | 0 | 0 | 0 | 0 | 0 | 1 | 0 | 0 | 0 | 0 | 0 | 0 | 0 | 0 | 0 | 0 | 0 | 0 | 0 | 0 | 0 | 0 | 0 | 0 |
| STAT5A::FGL2     | 0 | 0 | 0 | 0 | 0 | 0 | 0 | 0 | 0 | 0 | 0 | 0 | 0 | 0 | 0 | 0 | 0 | 0 | 0 | 0 | 0 | 0 | 0 | 0 | 0 | 0 | 1 | 0 | 0 | 0 |
| STAT5A::HAPLN3   | 0 | 0 | 0 | 0 | 0 | 0 | 0 | 0 | 1 | 0 | 0 | 0 | 0 | 0 | 0 | 1 | 1 | 0 | 0 | 0 | 0 | 0 | 0 | 0 | 0 | 0 | 0 | 0 | 0 | 1 |
| STAT5A::HPSE     | 0 | 0 | 0 | 0 | 0 | 0 | 0 | 0 | 0 | 0 | 0 | 0 | 0 | 0 | 0 | 1 | 0 | 0 | 0 | 0 | 0 | 0 | 0 | 0 | 0 | 0 | 0 | 0 | 0 | 0 |
| STAT5A::HTRA4    | 0 | 0 | 0 | 0 | 0 | 0 | 0 | 0 | 0 | 0 | 0 | 1 | 0 | 0 | 0 | 0 | 0 | 0 | 0 | 0 | 0 | 0 | 0 | 0 | 0 | 0 | 0 | 0 | 0 | 0 |
| STAT5A::LOXL3    | 0 | 0 | 0 | 0 | 0 | 0 | 0 | 0 | 0 | 0 | 0 | 0 | 0 | 1 | 0 | 0 | 0 | 0 | 0 | 0 | 0 | 0 | 0 | 0 | 0 | 0 | 0 | 0 | 0 | 0 |
| STAT5A::MMP14    | 0 | 0 | 0 | 0 | 0 | 0 | 0 | 0 | 0 | 0 | 0 | 0 | 0 | 0 | 0 | 1 | 0 | 0 | 0 | 0 | 0 | 0 | 0 | 0 | 0 | 0 | 0 | 0 | 0 | 0 |
| STAT5A::MMP28    | 0 | 0 | 0 | 0 | 0 | 0 | 0 | 0 | 1 | 0 | 0 | 0 | 0 | 0 | 0 | 0 | 0 | 0 | 0 | 0 | 0 | 0 | 0 | 0 | 0 | 0 | 0 | 0 | 0 | 0 |
| STAT5A::NTNG2    | 0 | 0 | 0 | 0 | 0 | 0 | 0 | 0 | 0 | 0 | 0 | 0 | 0 | 1 | 0 | 0 | 0 | 0 | 0 | 0 | 0 | 0 | 0 | 0 | 0 | 0 | 0 | 0 | 0 | 0 |
| STAT5A::OGFOD2   | 0 | 0 | 0 | 0 | 0 | 0 | 0 | 0 | 0 | 0 | 0 | 1 | 0 | 0 | 0 | 0 | 0 | 0 | 0 | 0 | 0 | 0 | 0 | 0 | 0 | 0 | 0 | 0 | 0 | 0 |
| STAT5A::SERPING1 | 0 | 0 | 0 | 0 | 0 | 0 | 0 | 0 | 0 | 0 | 1 | 0 | 0 | 0 | 0 | 0 | 0 | 0 | 0 | 0 | 0 | 0 | 0 | 0 | 0 | 0 | 0 | 0 | 0 | 0 |
| TAL1::ADAMTS7    | 0 | 0 | 0 | 0 | 0 | 0 | 0 | 0 | 0 | 0 | 1 | 0 | 0 | 0 | 0 | 0 | 0 | 0 | 0 | 0 | 0 | 0 | 0 | 0 | 0 | 1 | 0 | 0 | 0 | 0 |
| TAL1::ANGPT2     | 0 | 0 | 0 | 0 | 0 | 0 | 0 | 0 | 0 | 0 | 0 | 0 | 0 | 0 | 0 | 0 | 0 | 0 | 0 | 0 | 0 | 0 | 0 | 0 | 0 | 0 | 1 | 0 | 0 | 0 |
| TAL1::C1QTNF5    | 0 | 0 | 0 | 0 | 0 | 0 | 0 | 0 | 0 | 0 | 1 | 0 | 0 | 0 | 0 | 0 | 0 | 0 | 0 | 0 | 0 | 0 | 0 | 0 | 0 | 0 | 0 | 0 | 0 | 0 |
| TAL1::COL4A1     | 0 | 0 | 0 | 0 | 0 | 1 | 0 | 0 | 0 | 0 | 0 | 0 | 0 | 0 | 0 | 0 | 0 | 0 | 0 | 0 | 0 | 0 | 1 | 0 | 0 | 0 | 0 | 0 | 0 | 0 |
| TAL1::EGFL7      | 0 | 0 | 0 | 0 | 0 | 0 | 0 | 0 | 0 | 0 | 1 | 0 | 0 | 0 | 0 | 0 | 0 | 0 | 0 | 0 | 0 | 0 | 0 | 0 | 0 | 0 | 0 | 1 | 0 | 0 |
| TAL1::FN1        | 0 | 1 | 0 | 0 | 0 | 0 | 0 | 0 | 0 | 0 | 0 | 0 | 0 | 0 | 0 | 0 | 0 | 0 | 0 | 0 | 0 | 0 | 0 | 0 | 0 | 0 | 0 | 0 | 0 | 0 |
| TAL1::HPSE       | 0 | 0 | 0 | 0 | 0 | 0 | 0 | 1 | 0 | 0 | 0 | 0 | 0 | 0 | 0 | 0 | 0 | 0 | 0 | 0 | 0 | 0 | 0 | 0 | 0 | 0 | 0 | 0 | 0 | 0 |
| TAL1::PLXDC1     | 0 | 0 | 0 | 0 | 0 | 0 | 1 | 0 | 0 | 0 | 0 | 0 | 0 | 0 | 0 | 0 | 0 | 0 | 0 | 0 | 0 | 0 | 0 | 0 | 0 | 0 | 0 | 0 | 0 | 0 |
| TBX1::CLEC11A    | 0 | 0 | 0 | 0 | 0 | 0 | 0 | 0 | 0 | 0 | 0 | 0 | 1 | 0 | 0 | 0 | 0 | 0 | 0 | 0 | 0 | 0 | 0 | 0 | 0 | 0 | 0 | 0 | 0 | 0 |
| TBX1::CSPG4      | 0 | 0 | 0 | 0 | 0 | 0 | 0 | 0 | 1 | 0 | 0 | 0 | 0 | 0 | 0 | 0 | 0 | 0 | 0 | 0 | 0 | 0 | 0 | 0 | 0 | 0 | 0 | 0 | 0 | 0 |
| TBX1::MFAP2      | 0 | 0 | 0 | 0 | 0 | 0 | 1 | 0 | 0 | 0 | 0 | 0 | 0 | 0 | 0 | 0 | 0 | 0 | 0 | 0 | 0 | 0 | 0 | 0 | 0 | 0 | 0 | 0 | 0 | 0 |
| TBX1::NTNG2      | 1 | 0 | 0 | 0 | 0 | 0 | 0 | 0 | 0 | 0 | 0 | 0 | 0 | 0 | 0 | 0 | 0 | 0 | 0 | 0 | 0 | 0 | 0 | 0 | 0 | 0 | 0 | 0 | 0 | 0 |
| TBX1::SDC1       | 0 | 1 | 0 | 0 | 0 | 0 | 0 | 0 | 0 | 0 | 0 | 0 | 0 | 0 | 0 | 0 | 0 | 0 | 0 | 0 | 0 | 0 | 0 | 0 | 0 | 0 | 0 | 0 | 0 | 0 |
| TBX15::ADAMTS6   | 0 | 0 | 0 | 0 | 0 | 1 | 0 | 0 | 0 | 0 | 0 | 0 | 0 | 0 | 0 | 0 | 0 | 0 | 0 | 0 | 0 | 0 | 0 | 0 | 0 | 0 | 0 | 0 | 0 | 0 |
| TBX15::C1QTNF3   | 0 | 0 | 0 | 0 | 0 | 0 | 0 | 0 | 0 | 0 | 0 | 1 | 0 | 0 | 0 | 0 | 0 | 0 | 0 | 0 | 0 | 0 | 0 | 0 | 0 | 0 | 0 | 0 | 0 | 0 |
| TBX15::HAPLN1    | 0 | 0 | 0 | 0 | 0 | 0 | 0 | 0 | 0 | 0 | 0 | 1 | 0 | 0 | 0 | 0 | 0 | 0 | 0 | 0 | 0 | 0 | 0 | 0 | 0 | 0 | 1 | 0 | 0 | 0 |
| TBX19::ADAMTS10  | 0 | 0 | 0 | 0 | 0 | 0 | 0 | 0 | 0 | 0 | 0 | 1 | 0 | 0 | 0 | 0 | 0 | 0 | 0 | 0 | 0 | 0 | 0 | 0 | 0 | 0 | 0 | 0 | 0 | 0 |
| TBX19::CBLN3     | 0 | 0 | 0 | 0 | 0 | 0 | 0 | 0 | 0 | 0 | 0 | 1 | 0 | 0 | 0 | 1 | 0 | 0 | 0 | 0 | 0 | 0 | 0 | 0 | 0 | 0 | 0 | 0 | 0 | 0 |
| TBX19::PLXNA3    | 0 | 0 | 0 | 0 | 0 | 0 | 0 | 0 | 0 | 0 | 0 | 0 | 0 | 0 | 0 | 1 | 0 | 0 | 0 | 0 | 0 | 0 | 0 | 0 | 0 | 0 | 0 | 0 | 0 | 0 |
| TBX2::C1QTNF5    | 0 | 0 | 1 | 0 | 0 | 0 | 0 | 0 | 0 | 0 | 0 | 0 | 0 | 0 | 0 | 0 | 0 | 0 | 0 | 0 | 0 | 0 | 0 | 0 | 0 | 0 | 0 | 0 | 0 | 0 |
| TBX2::PLXDC1     | 0 | 0 | 0 | 0 | 0 | 0 | 0 | 0 | 0 | 0 | 0 | 0 | 0 | 0 | 0 | 0 | 0 | 0 | 0 | 0 | 0 | 0 | 0 | 0 | 0 | 0 | 1 | 0 | 0 | 0 |
| TBX2::SEMA4C     | 0 | 0 | 1 | 0 | 0 | 0 | 0 | 0 | 0 | 0 | 0 | 0 | 0 | 0 | 0 | 0 | 0 | 0 | 0 | 0 | 0 | 0 | 0 | 0 | 0 | 0 | 0 | 0 | 0 | 0 |
| TBX21::CXCL9     | 0 | 0 | 0 | 0 | 0 | 0 | 0 | 0 | 0 | 0 | 0 | 0 | 0 | 0 | 0 | 0 | 0 | 0 | 0 | 0 | 0 | 0 | 0 | 0 | 0 | 0 | 1 | 0 | 0 | 0 |
| TBX21::FASLG     | 0 | 0 | 0 | 0 | 0 | 0 | 0 | 0 | 0 | 0 | 0 | 0 | 0 | 0 | 0 | 0 | 0 | 0 | 0 | 0 | 0 | 0 | 0 | 0 | 0 | 0 | 1 | 0 | 0 | 0 |

















|                        |   |   |   |   |   |   |   |   |   |   |   |   |   |   |   |   |   |   |   |   |   |   |   |   |   |   |   |   |
|------------------------|---|---|---|---|---|---|---|---|---|---|---|---|---|---|---|---|---|---|---|---|---|---|---|---|---|---|---|---|
| <b>ZSCAN16::LAMC2</b>  | 0 | 1 | 0 | 0 | 0 | 0 | 0 | 0 | 0 | 0 | 0 | 0 | 0 | 0 | 0 | 0 | 0 | 0 | 0 | 0 | 0 | 0 | 0 | 0 | 0 | 0 | 0 | 0 |
| <b>ZSCAN16::SEMA3F</b> | 0 | 1 | 0 | 0 | 0 | 0 | 0 | 0 | 0 | 0 | 0 | 0 | 0 | 0 | 0 | 0 | 0 | 0 | 0 | 0 | 0 | 0 | 0 | 0 | 0 | 0 | 0 | 0 |
| <b>ZSCAN16::ST14</b>   | 0 | 1 | 0 | 0 | 0 | 0 | 0 | 0 | 0 | 0 | 0 | 0 | 0 | 0 | 0 | 0 | 0 | 0 | 0 | 0 | 0 | 0 | 0 | 0 | 0 | 0 | 0 | 0 |
| <b>ZSCAN16::VWCE</b>   | 0 | 0 | 0 | 0 | 0 | 0 | 0 | 0 | 0 | 0 | 0 | 0 | 0 | 1 | 0 | 0 | 0 | 0 | 0 | 0 | 0 | 0 | 0 | 0 | 0 | 0 | 0 | 0 |

Numbers in the table report whether a module is active (1) or not (0) in any given tumor type. Modules are named as TF::matrixome target.



**Supplemental Table 7. Prognostic matrisome modules**

| <b>Tumor</b> | <b>Transcription factor</b> | <b>Matrisome gene target</b> | <b>P value</b> | <b>Better prognosis</b> | <b>Worse prognosis</b> |
|--------------|-----------------------------|------------------------------|----------------|-------------------------|------------------------|
| ACC          | TCF3                        | SERPINH1                     | 5.28988E-06    | module-low              | module-high            |
| ACC          | TCF7L2                      | ADAMTS7                      | 3.07808E-05    | module-low              | module-high            |
| ACC          | SMAD3                       | NTNG2                        | 0.000135261    | module-low              | module-high            |
| ACC          | ZBTB49                      | ADAMTS7                      | 0.000294777    | module-low              | module-high            |
| ACC          | SMAD3                       | SEMA7A                       | 0.000501965    | module-low              | module-high            |
| ACC          | TBX1                        | NTNG2                        | 0.000531329    | module-low              | module-high            |
| ACC          | TCF3                        | COL15A1                      | 0.00123809     | module-low              | module-high            |
| ACC          | RARB                        | MMRN2                        | 0.00263679     | module-high             | module-low             |
| ACC          | SOX8                        | WNT11                        | 0.014516513    | module-low              | module-high            |
| ACC          | ZNF35                       | TNXB                         | 0.03487466     | module-low              | module-high            |
| ACC          | ZNF143                      | COL15A1                      | 0.045534996    | module-low              | module-high            |
| BLCA         | NR2F6                       | OGFOD2                       | 0.001649254    | module-high             | module-low             |
| BLCA         | NR2F6                       | PLXNB2                       | 0.004526848    | module-high             | module-low             |
| BLCA         | NR2F6                       | ST14                         | 0.002371232    | module-high             | module-low             |
| BLCA         | NR6A1                       | BGLAP                        | 0.048204052    | module-high             | module-low             |
| BLCA         | PPARG                       | ADAMTS7                      | 0.000545996    | module-high             | module-low             |
| BLCA         | PPARG                       | IGFBP3                       | 0.006882439    | module-high             | module-low             |
| BLCA         | PPARG                       | TINAGL1                      | 0.008805562    | module-high             | module-low             |
| BLCA         | PRRX1                       | FBN2                         | 0.035846959    | module-low              | module-high            |
| BLCA         | PRRX1                       | MMP14                        | 0.019172173    | module-low              | module-high            |
| BLCA         | RARG                        | PLXNB2                       | 0.021044962    | module-high             | module-low             |
| BLCA         | RFX7                        | PLXNB1                       | 0.0277367      | module-high             | module-low             |
| BLCA         | RUNX2                       | FBN2                         | 0.025574572    | module-low              | module-high            |
| BLCA         | SMAD3                       | IGFBP3                       | 0.041645963    | module-high             | module-low             |
| BLCA         | TBX1                        | SDC1                         | 0.018132999    | module-high             | module-low             |
| BLCA         | TCF3                        | PLXNB1                       | 0.010507094    | module-high             | module-low             |
| BLCA         | TEAD4                       | ADAM15                       | 0.037885549    | module-low              | module-high            |
| BLCA         | TEAD4                       | PLAU                         | 0.024111034    | module-low              | module-high            |
| BLCA         | TFAP4                       | GPC2                         | 0.023439704    | module-high             | module-low             |
| BLCA         | ZNF691                      | BGLAP                        | 0.016859878    | module-high             | module-low             |
| BLCA         | ZSCAN16                     | SEMA3F                       | 2.08E-05       | module-high             | module-low             |
| BLCA         | ZSCAN16                     | ST14                         | 0.000714791    | module-high             | module-low             |
| BRCA         | NR2F2                       | LRG1                         | 0.001160383    | module-high             | module-low             |
| BRCA         | PRDM1                       | CLEC2D                       | 0.01246197     | module-high             | module-low             |
| BRCA         | RARA                        | CHRD                         | 0.019458371    | module-high             | module-low             |
| BRCA         | RARA                        | SEMA3F                       | 0.001561244    | module-high             | module-low             |
| BRCA         | RFX1                        | CILP2                        | 0.001738291    | module-high             | module-low             |
| BRCA         | RFX1                        | MMP17                        | 0.046825623    | module-high             | module-low             |

|              |        |          |             |             |             |
|--------------|--------|----------|-------------|-------------|-------------|
| <b>BRCA</b>  | RREB1  | LRG1     | 0.007878654 | module-high | module-low  |
| <b>BRCA</b>  | RXRA   | SEMA3F   | 0.049877246 | module-high | module-low  |
| <b>BRCA</b>  | SP1    | NELL2    | 0.017276383 | module-high | module-low  |
| <b>BRCA</b>  | SREBF1 | MUC1     | 0.00278415  | module-high | module-low  |
| <b>BRCA</b>  | TEAD1  | LOXL2    | 0.015085869 | module-low  | module-high |
| <b>BRCA</b>  | TFAP2A | MUC1     | 0.005754719 | module-high | module-low  |
| <b>BRCA</b>  | USF1   | SEMA4A   | 0.014215827 | module-high | module-low  |
| <b>BRCA</b>  | XBP1   | ANXA9    | 0.003624732 | module-high | module-low  |
| <b>BRCA</b>  | XBP1   | CHRD     | 0.007690921 | module-high | module-low  |
| <b>BRCA</b>  | XBP1   | LRG1     | 0.001319192 | module-high | module-low  |
| <b>BRCA</b>  | XBP1   | MFAP2    | 0.017658529 | module-high | module-low  |
| <b>BRCA</b>  | XBP1   | SERPINH1 | 0.044552714 | module-high | module-low  |
| <b>BRCA</b>  | ZBTB7A | MMP17    | 0.027785497 | module-high | module-low  |
| <b>BRCA</b>  | ZBTB7B | LRG1     | 0.000183295 | module-high | module-low  |
| <b>BRCA</b>  | ZBTB7B | MUC1     | 0.014483349 | module-high | module-low  |
| <b>BRCA</b>  | ZEB1   | ST14     | 0.01551516  | module-low  | module-high |
| <b>BRCA</b>  | ZNF219 | LOXL1    | 0.006749677 | module-high | module-low  |
| <b>BRCA</b>  | ZNF281 | SEMA3F   | 0.007312899 | module-high | module-low  |
| <b>BRCA</b>  | ZNF628 | EGLN2    | 0.01232958  | module-high | module-low  |
| <b>BRCA</b>  | ZNF652 | NPNT     | 0.001214069 | module-high | module-low  |
| <b>BRCA</b>  | ZNF75A | NELL2    | 0.035412353 | module-high | module-low  |
| <b>CECSC</b> | BACH1  | CXCL8    | 0.003311276 | module-low  | module-high |
| <b>CECSC</b> | NFE2   | CXCL1    | 0.027222979 | module-low  | module-high |
| <b>CECSC</b> | RFX2   | PLXNB1   | 0.046491876 | module-high | module-low  |
| <b>CECSC</b> | SOX2   | HPSE     | 0.015019977 | module-high | module-low  |
| <b>CECSC</b> | STAT5A | CCL22    | 0.048813656 | module-high | module-low  |
| <b>CECSC</b> | TEAD1  | LAMC2    | 0.014089816 | module-low  | module-high |
| <b>CECSC</b> | ZNF219 | PODNL1   | 0.011662186 | module-low  | module-high |
| <b>COAD</b>  | RELA   | C1QTNF1  | 0.003342958 | module-low  | module-high |
| <b>COAD</b>  | RFX3   | ADAMTS6  | 0.027789537 | module-low  | module-high |
| <b>COAD</b>  | ZEB1   | COL6A3   | 0.042602017 | module-low  | module-high |
| <b>COAD</b>  | ZNF713 | ADAMTS6  | 0.028415083 | module-low  | module-high |
| <b>GBM</b>   | VDR    | CSF1     | 0.012676998 | module-low  | module-high |
| <b>GBM</b>   | VDR    | F13A1    | 0.040482665 | module-low  | module-high |
| <b>GBM</b>   | ZNF281 | EFEMP2   | 0.024230538 | module-low  | module-high |
| <b>HNSC</b>  | RARA   | SERPINE1 | 0.035066904 | module-low  | module-high |
| <b>HNSC</b>  | RUNX2  | SEMA3C   | 0.029994943 | module-low  | module-high |
| <b>HNSC</b>  | SOX18  | PAPLN    | 0.02213199  | module-high | module-low  |
| <b>HNSC</b>  | SP3    | COL8A2   | 0.025686302 | module-high | module-low  |
| <b>HNSC</b>  | STAT5A | CCL5     | 0.007139558 | module-high | module-low  |
| <b>HNSC</b>  | STAT5A | COL8A2   | 0.001784191 | module-high | module-low  |
| <b>HNSC</b>  | STAT5A | HAPLN3   | 0.018176652 | module-high | module-low  |
| <b>HNSC</b>  | STAT5A | MMP28    | 0.038219845 | module-high | module-low  |
| <b>HNSC</b>  | VDR    | TINAGL1  | 0.013020321 | module-low  | module-high |

|             |        |          |             |             |             |
|-------------|--------|----------|-------------|-------------|-------------|
| <b>HNSC</b> | ZEB1   | MMP19    | 0.028886024 | module-high | module-low  |
| <b>KICH</b> | TFEB   | EGLN2    | 0.00789214  | module-high | module-low  |
| <b>KICH</b> | ZBTB7A | LAMA5    | 0.012130945 | module-high | module-low  |
| <b>KICH</b> | ZNF219 | OGFOD2   | 0.028149292 | module-high | module-low  |
| <b>KICH</b> | ZNF219 | EGLN2    | 0.006278103 | module-high | module-low  |
| <b>KIRC</b> | ATF3   | CXCL2    | 0.005604564 | module-low  | module-high |
| <b>KIRC</b> | NFKB2  | EBI3     | 0.002623082 | module-low  | module-high |
| <b>KIRC</b> | NFKB2  | P4HA1    | 0.046885302 | module-low  | module-high |
| <b>KIRC</b> | PAX2   | CX3CL1   | 0.002931256 | module-high | module-low  |
| <b>KIRC</b> | POU2F1 | LGALS8   | 0.01888582  | module-low  | module-high |
| <b>KIRC</b> | POU3F1 | CSF1     | 0.03447886  | module-low  | module-high |
| <b>KIRC</b> | RARG   | LGI4     | 0.002039085 | module-low  | module-high |
| <b>KIRC</b> | RELA   | SERPINE1 | 0.000318604 | module-low  | module-high |
| <b>KIRC</b> | RFX1   | LAMA5    | 0.008127486 | module-low  | module-high |
| <b>KIRC</b> | RORA   | HMCN1    | 8.86E-06    | module-high | module-low  |
| <b>KIRC</b> | RORA   | P4HA2    | 0.045830965 | module-high | module-low  |
| <b>KIRC</b> | RUNX1  | ANXA5    | 1.17E-06    | module-low  | module-high |
| <b>KIRC</b> | RUNX1  | LAMA4    | 0.003931839 | module-low  | module-high |
| <b>KIRC</b> | RUNX1  | VCAN     | 0.000227449 | module-low  | module-high |
| <b>KIRC</b> | SP1    | CSF1     | 0.004572017 | module-low  | module-high |
| <b>KIRC</b> | SP1    | MUC3A    | 0.009720805 | module-low  | module-high |
| <b>KIRC</b> | STAT5A | SERPING1 | 0.002767937 | module-low  | module-high |
| <b>KIRC</b> | TBX19  | ADAMTS10 | 0.009062649 | module-low  | module-high |
| <b>KIRC</b> | TBX19  | CBLN3    | 0.000376126 | module-low  | module-high |
| <b>KIRC</b> | TCF4   | A2M      | 0.012738597 | module-high | module-low  |
| <b>KIRC</b> | TCF4   | CLEC14A  | 0.022825311 | module-high | module-low  |
| <b>KIRC</b> | TCF4   | HSPG2    | 0.003139282 | module-high | module-low  |
| <b>KIRC</b> | TEAD3  | CSF1     | 1.06E-08    | module-low  | module-high |
| <b>KIRC</b> | TEAD4  | SERPINE1 | 0.000111154 | module-low  | module-high |
| <b>KIRC</b> | TFAP4  | ADAMTSL4 | 2.06E-05    | module-low  | module-high |
| <b>KIRC</b> | TFAP4  | LOXL2    | 0.010515427 | module-low  | module-high |
| <b>KIRC</b> | TFAP4  | PLOD1    | 0.001027241 | module-low  | module-high |
| <b>KIRC</b> | ZFX    | PLXNA2   | 0.001397604 | module-high | module-low  |
| <b>KIRP</b> | PAX2   | CX3CL1   | 0.006707384 | module-high | module-low  |
| <b>KIRP</b> | POU3F3 | CX3CL1   | 0.030862625 | module-high | module-low  |
| <b>KIRP</b> | SP1    | PAPLN    | 0.028037801 | module-high | module-low  |
| <b>KIRP</b> | STAT5A | HTRA4    | 0.009502427 | module-high | module-low  |
| <b>LAML</b> | RREB1  | NTNG2    | 0.015116527 | module-high | module-low  |
| <b>LAML</b> | RUNX2  | SERPINB8 | 0.022606921 | module-high | module-low  |
| <b>LAML</b> | RXRA   | SEMA4A   | 0.045547267 | module-low  | module-high |
| <b>LAML</b> | SP3    | ZFP91    | 0.034682139 | module-high | module-low  |
| <b>LAML</b> | TBX1   | CLEC11A  | 0.00045927  | module-high | module-low  |
| <b>LAML</b> | TEAD4  | VWCE     | 0.023116405 | module-high | module-low  |
| <b>LAML</b> | ZEB1   | NTNG2    | 0.048046253 | module-high | module-low  |

|             |        |          |             |             |             |
|-------------|--------|----------|-------------|-------------|-------------|
| <b>LAML</b> | ZNF713 | CRLF3    | 0.020548102 | module-high | module-low  |
| <b>LGG</b>  | BACH1  | A2M      | 0.015715357 | module-low  | module-high |
| <b>LGG</b>  | NFKB1  | LTBP3    | 0.029222746 | module-low  | module-high |
| <b>LGG</b>  | NR3C1  | FGF2     | 0.026140605 | module-high | module-low  |
| <b>LGG</b>  | NR3C1  | VCAN     | 0.000349736 | module-high | module-low  |
| <b>LGG</b>  | PAX6   | MASP1    | 0.03847823  | module-high | module-low  |
| <b>LGG</b>  | REST   | LOXL3    | 9.91E-09    | module-low  | module-high |
| <b>LGG</b>  | REST   | TNC      | 1.01E-07    | module-low  | module-high |
| <b>LGG</b>  | REST   | WNT5A    | 1.94E-05    | module-low  | module-high |
| <b>LGG</b>  | RFX1   | LTBP3    | 0.012040946 | module-low  | module-high |
| <b>LGG</b>  | RFX5   | ADAMTS6  | 0.011068769 | module-high | module-low  |
| <b>LGG</b>  | RUNX1  | A2M      | 0.000141338 | module-low  | module-high |
| <b>LGG</b>  | RUNX1  | CSF1     | 8.31E-05    | module-low  | module-high |
| <b>LGG</b>  | RUNX1  | NTN1     | 0.002190275 | module-low  | module-high |
| <b>LGG</b>  | SOX2   | SMOC1    | 1.93E-05    | module-high | module-low  |
| <b>LGG</b>  | STAT5A | A2M      | 0.000381721 | module-low  | module-high |
| <b>LGG</b>  | STAT5A | LOXL3    | 7.51E-05    | module-low  | module-high |
| <b>LGG</b>  | TCF12  | ADAMTS6  | 0.001553505 | module-high | module-low  |
| <b>LGG</b>  | TCF12  | BMP2     | 3.90E-08    | module-high | module-low  |
| <b>LGG</b>  | TCF12  | VCAN     | 7.78E-06    | module-high | module-low  |
| <b>LGG</b>  | TFAP4  | ANGPTL2  | 3.04E-09    | module-high | module-low  |
| <b>LGG</b>  | TFAP4  | PODN     | 0.00295398  | module-high | module-low  |
| <b>LGG</b>  | VAX2   | C1QL1    | 2.01E-05    | module-high | module-low  |
| <b>LGG</b>  | VAX2   | GPC2     | 0.012321136 | module-high | module-low  |
| <b>LGG</b>  | ZNF652 | C1QTNF5  | 0.000131345 | module-high | module-low  |
| <b>LGG</b>  | ZNF713 | ADAMTS6  | 0.044244092 | module-high | module-low  |
| <b>LGG</b>  | ZNF784 | LTBP3    | 0.032087461 | module-low  | module-high |
| <b>LUAD</b> | NFAT5  | CLEC2D   | 0.019561203 | module-high | module-low  |
| <b>LUAD</b> | NR2F6  | KAZALD1  | 0.018775607 | module-low  | module-high |
| <b>LUAD</b> | PITX1  | ANXA10   | 0.015047999 | module-low  | module-high |
| <b>LUAD</b> | PLAG1  | CRLF1    | 0.020508454 | module-low  | module-high |
| <b>LUAD</b> | PPARA  | PAPLN    | 0.012858276 | module-low  | module-high |
| <b>LUAD</b> | PRRX2  | PODNL1   | 0.024020211 | module-high | module-low  |
| <b>LUAD</b> | RARA   | ANGPTL4  | 0.012594531 | module-low  | module-high |
| <b>LUAD</b> | RARA   | SDC1     | 0.032133692 | module-high | module-low  |
| <b>LUAD</b> | RARA   | VWA1     | 0.019394745 | module-high | module-low  |
| <b>LUAD</b> | RELA   | HPSE     | 0.004126654 | module-low  | module-high |
| <b>LUAD</b> | SP3    | HPSE     | 0.009479946 | module-low  | module-high |
| <b>LUAD</b> | STAT5A | HAPLN3   | 0.031420021 | module-low  | module-high |
| <b>LUAD</b> | TBX19  | CBLN3    | 0.028934965 | module-high | module-low  |
| <b>LUAD</b> | TBX19  | PLXNA3   | 0.014336801 | module-high | module-low  |
| <b>LUAD</b> | TFAP2A | ADAMTSL5 | 0.001157149 | module-low  | module-high |
| <b>LUAD</b> | TFAP2A | SEMA4B   | 4.56E-05    | module-low  | module-high |
| <b>LUAD</b> | VDR    | COL24A1  | 0.015345863 | module-high | module-low  |

|             |        |          |             |             |             |
|-------------|--------|----------|-------------|-------------|-------------|
| <b>LUAD</b> | ZIC2   | ADAMTSL5 | 0.002412552 | module-low  | module-high |
| <b>LUSC</b> | PGR    | VCAN     | 0.022504219 | module-low  | module-high |
| <b>LUSC</b> | POU6F2 | ADAMTS17 | 0.035313357 | module-high | module-low  |
| <b>LUSC</b> | POU6F2 | NELL2    | 0.028833279 | module-high | module-low  |
| <b>LUSC</b> | RORA   | CD109    | 0.037308447 | module-high | module-low  |
| <b>LUSC</b> | TCF3   | GPC2     | 0.047962331 | module-high | module-low  |
| <b>LUSC</b> | TEAD3  | ADAMTS17 | 0.000565815 | module-high | module-low  |
| <b>LUSC</b> | TFAP2A | GREM1    | 0.038672636 | module-low  | module-high |
| <b>LUSC</b> | TFAP2C | WNT5A    | 0.014194057 | module-high | module-low  |
| <b>LUSC</b> | VAX2   | ADAMTS17 | 0.027206135 | module-high | module-low  |
| <b>LUSC</b> | ZIC3   | LAMA1    | 0.018094127 | module-high | module-low  |
| <b>MESO</b> | NR2F6  | SERPINH1 | 1.86E-05    | module-low  | module-high |
| <b>MESO</b> | SNAI2  | COL15A1  | 7.26E-05    | module-low  | module-high |
| <b>MESO</b> | NR2F1  | CXCL6    | 0.00011213  | module-high | module-low  |
| <b>MESO</b> | ZNF219 | ANXA11   | 0.001054055 | module-high | module-low  |
| <b>MESO</b> | RARG   | LOXL1    | 0.001107784 | module-low  | module-high |
| <b>MESO</b> | VAX2   | MMP14    | 0.001766403 | module-low  | module-high |
| <b>MESO</b> | VAX2   | EFEMP2   | 0.007231699 | module-low  | module-high |
| <b>MESO</b> | WT1    | FMOD     | 0.010194241 | module-high | module-low  |
| <b>MESO</b> | WT1    | SULF1    | 0.012273306 | module-high | module-low  |
| <b>MESO</b> | XBP1   | CCL2     | 0.014433129 | module-high | module-low  |
| <b>MESO</b> | PDX1   | COL11A2  | 0.015279822 | module-low  | module-high |
| <b>MESO</b> | SP4    | NID2     | 0.015342693 | module-low  | module-high |
| <b>MESO</b> | PBX1   | LAMA4    | 0.018139411 | module-high | module-low  |
| <b>MESO</b> | NFIB   | EGFLAM   | 0.020564475 | module-low  | module-high |
| <b>MESO</b> | OSR1   | SEMA5A   | 0.035720984 | module-low  | module-high |
| <b>PAAD</b> | NFAT5  | LAMA3    | 0.001192108 | module-low  | module-high |
| <b>PAAD</b> | NKX2-8 | EREG     | 0.02226153  | module-low  | module-high |
| <b>PAAD</b> | SMAD3  | PRSS12   | 0.007529121 | module-low  | module-high |
| <b>PAAD</b> | TEAD3  | MMP3     | 0.002817375 | module-low  | module-high |
| <b>PRAD</b> | NR2F6  | BGLAP    | 0.037671358 | module-low  | module-high |
| <b>PRAD</b> | REST   | IMPG1    | 0.021579481 | module-low  | module-high |
| <b>SARC</b> | NFKB2  | HAPLN3   | 0.020259306 | module-high | module-low  |
| <b>SARC</b> | NKX6-1 | LOXL2    | 0.00217866  | module-low  | module-high |
| <b>SARC</b> | NR2F6  | SERPINH1 | 0.015464811 | module-low  | module-high |
| <b>SARC</b> | POU3F3 | PXDN     | 0.025713805 | module-low  | module-high |
| <b>SARC</b> | REST   | FBN2     | 0.002778349 | module-low  | module-high |
| <b>SARC</b> | RORA   | PXDN     | 0.00232826  | module-low  | module-high |
| <b>SARC</b> | SOX17  | LAMA4    | 0.036000281 | module-high | module-low  |
| <b>SARC</b> | TCF3   | MFAP2    | 0.007394702 | module-low  | module-high |
| <b>STAD</b> | POU2F2 | NTNG2    | 0.028992554 | module-low  | module-high |
| <b>STAD</b> | RARA   | HTRA3    | 0.036741491 | module-low  | module-high |
| <b>STAD</b> | RORA   | SRPX2    | 0.00152623  | module-low  | module-high |
| <b>STAD</b> | RREB1  | PLXNB2   | 0.037169493 | module-high | module-low  |

|             |        |          |             |             |             |
|-------------|--------|----------|-------------|-------------|-------------|
| <b>STAD</b> | SNAI2  | LOX      | 0.002392283 | module-low  | module-high |
| <b>STAD</b> | TAL1   | ADAMTS7  | 0.010536732 | module-low  | module-high |
| <b>STAD</b> | TAL1   | ANGPT2   | 0.001790626 | module-low  | module-high |
| <b>STAD</b> | TCF21  | AGT      | 0.03075979  | module-low  | module-high |
| <b>STAD</b> | TCF3   | SEMA4D   | 0.01999062  | module-high | module-low  |
| <b>STAD</b> | TCF4   | COL15A1  | 0.024149113 | module-low  | module-high |
| <b>STAD</b> | TEAD1  | HSPG2    | 0.030284765 | module-low  | module-high |
| <b>STAD</b> | TEAD4  | SERPINE1 | 0.01340268  | module-low  | module-high |
| <b>STAD</b> | ZBTB7B | SDC1     | 0.036447193 | module-high | module-low  |
| <b>STAD</b> | ZEB1   | IGFBP7   | 0.000154535 | module-low  | module-high |
| <b>STAD</b> | ZEB1   | THBS1    | 0.004867948 | module-low  | module-high |
| <b>STAD</b> | ZNF143 | OGFOD1   | 0.009753086 | module-low  | module-high |
| <b>STAD</b> | ZNF713 | ADAMTS6  | 0.003522014 | module-low  | module-high |
| <b>THCA</b> | POU2F3 | VWA5A    | 0.013279907 | module-high | module-low  |
| <b>THCA</b> | PRDM1  | ADAMTS9  | 0.006701597 | module-high | module-low  |
| <b>THCA</b> | PRDM1  | FGF1     | 0.034147628 | module-high | module-low  |
| <b>THCA</b> | RARG   | CST6     | 0.042919101 | module-high | module-low  |
| <b>THCA</b> | REST   | PLXNC1   | 0.034150661 | module-high | module-low  |
| <b>THCA</b> | TCF4   | COL15A1  | 0.013687991 | module-low  | module-high |
| <b>THCA</b> | TFAP2C | ANXA1    | 0.041003381 | module-high | module-low  |
| <b>THCA</b> | TFAP2C | COL8A2   | 0.036689361 | module-high | module-low  |
| <b>THCA</b> | ZNF143 | NELL2    | 0.013923797 | module-high | module-low  |
| <b>UCEC</b> | NR2F6  | CILP2    | 0.000884206 | module-low  | module-high |
| <b>UCEC</b> | ZBTB7A | PRSS1    | 0.002737465 | module-low  | module-high |
| <b>UCEC</b> | ZBTB7B | ESM1     | 0.003827208 | module-low  | module-high |
| <b>UCS</b>  | RARA   | CCL7     | 0.010641011 | module-high | module-low  |
| <b>UCS</b>  | TCF7L1 | ADAMTS17 | 0.022391296 | module-high | module-low  |

*P* values are calculated for univariate survival curves (Kaplan-Meier, Log-rank test). Patients in each cohort are divided at the average expression of the module (average of TF and target expression values) into module-high and -low group (above and below the average module activity, respectively) and compared. Association of a group with better (longer overall survival) or worse (shorter overall survival) prognosis is reported.

**Supplemental Table 8. Drivers of matrisome modules**

| Driver                 | ACC       | BLCA       | BRCA       | CESC       | CHOL      | COAD      | ESCA       | GBM        | HNSC       | KICH      | KIRC       | KIRP       | LAML      | LGG        | LIHC     | LUAD       | LUSC       | MESO      | PAAD     | PCPG      | PRAD      | READ      | SARC      | STAD       | TGCT      | THCA       | UCEC       | UCS       | In tumors | N tot int | N avg int |
|------------------------|-----------|------------|------------|------------|-----------|-----------|------------|------------|------------|-----------|------------|------------|-----------|------------|----------|------------|------------|-----------|----------|-----------|-----------|-----------|-----------|------------|-----------|------------|------------|-----------|-----------|-----------|-----------|
| EP300                  | 9         | 25         | 33         | 34         | 4         | 6         | 10         | 15         | 54         | 6         | 30         | 18         | 16        | 14         | 2        | 24         | 20         | 9         | 3        | 8         | 15        | 6         | 8         | 23         | 10        | 23         | 16         | 6         | 28        | 447       | 15.964    |
| TP53                   | 10        | 19         | 32         | 22         | 3         | 14        | 18         | 18         | 28         | 16        | 20         | 10         | 14        | 12         | 0        | 24         | 34         | 12        | 2        | 12        | 18        | 6         | 8         | 22         | 3         | 21         | 16         | 4         | 27        | 418       | 14.929    |
| CREBBP                 | 7         | 18         | 17         | 10         | 3         | 6         | 8          | 15         | 19         | 5         | 21         | 12         | 16        | 9          | 0        | 13         | 8          | 7         | 0        | 9         | 8         | 3         | 6         | 13         | 8         | 17         | 6          | 3         | 26        | 267       | 9.536     |
| NCOR1                  | 4         | 21         | 12         | 11         | 5         | 3         | 4          | 12         | 11         | 4         | 13         | 9          | 6         | 13         | 0        | 8          | 11         | 5         | 0        | 8         | 7         | 5         | 3         | 7          | 4         | 16         | 6          | 4         | 26        | 212       | 7.571     |
| RB1                    | 3         | 17         | 14         | 10         | 2         | 0         | 4          | 16         | 10         | 3         | 9          | 11         | 9         | 0          | 0        | 6          | 28         | 0         | 0        | 3         | 7         | 2         | 4         | 7          | 0         | 10         | 12         | 0         | 21        | 187       | 6.679     |
| SMARCA4                | 3         | 8          | 9          | 7          | 0         | 4         | 9          | 7          | 12         | 4         | 13         | 11         | 7         | 11         | 2        | 10         | 7          | 4         | 0        | 6         | 4         | 5         | 5         | 6          | 5         | 7          | 2          | 0         | 25        | 168       | 6.000     |
| ARID1A                 | 8         | 10         | 5          | 12         | 2         | 8         | 10         | 6          | 7          | 4         | 11         | 2          | 0         | 6          | 0        | 5          | 14         | 0         | 2        | 7         | 5         | 6         | 0         | 10         | 0         | 7          | 4          | 10        | 23        | 161       | 5.750     |
| CTNNB1                 | 6         | 12         | 10         | 9          | 0         | 0         | 6          | 3          | 8          | 3         | 8          | 7          | 3         | 5          | 0        | 6          | 8          | 4         | 0        | 2         | 0         | 3         | 0         | 9          | 3         | 10         | 8          | 3         | 22        | 136       | 4.857     |
| SMAD4                  | 3         | 11         | 7          | 5          | 2         | 4         | 6          | 0          | 10         | 3         | 6          | 8          | 0         | 5          | 0        | 6          | 0          | 4         | 2        | 0         | 0         | 4         | 0         | 12         | 0         | 14         | 3          | 0         | 19        | 115       | 4.107     |
| NSD1                   | 2         | 12         | 8          | 0          | 2         | 0         | 0          | 6          | 10         | 2         | 8          | 0          | 4         | 0          | 0        | 9          | 0          | 5         | 0        | 3         | 10        | 0         | 3         | 5          | 4         | 7          | 2          | 3         | 19        | 105       | 3.750     |
| NOTCH1                 | 3         | 6          | 6          | 6          | 2         | 0         | 6          | 3          | 10         | 3         | 6          | 0          | 0         | 20         | 0        | 6          | 4          | 4         | 0        | 0         | 0         | 2         | 0         | 5          | 0         | 10         | 0          | 0         | 17        | 102       | 3.643     |
| FBXW7                  | 0         | 4          | 0          | 0          | 2         | 0         | 6          | 3          | 20         | 0         | 4          | 3          | 5         | 4          | 0        | 0          | 14         | 0         | 0        | 2         | 0         | 0         | 2         | 0          | 0         | 3          | 6          | 0         | 14        | 78        | 2.786     |
| BRCA2                  | 2         | 5          | 0          | 6          | 0         | 3         | 4          | 0          | 8          | 0         | 5          | 12         | 0         | 3          | 0        | 4          | 0          | 0         | 0        | 0         | 3         | 4         | 0         | 5          | 0         | 7          | 0          | 0         | 14        | 71        | 2.536     |
| BCOR                   | 3         | 4          | 5          | 0          | 0         | 0         | 0          | 3          | 0          | 3         | 5          | 9          | 4         | 0          | 0        | 0          | 5          | 0         | 0        | 2         | 4         | 0         | 0         | 0          | 0         | 4          | 6          | 0         | 13        | 57        | 2.036     |
| GATA3                  | 2         | 0          | 4          | 3          | 0         | 0         | 5          | 0          | 5          | 0         | 7          | 7          | 0         | 0          | 0        | 0          | 0          | 0         | 0        | 2         | 0         | 2         | 0         | 0          | 0         | 3          | 0          | 0         | 10        | 40        | 1.429     |
| CHD4                   | 0         | 0          | 5          | 3          | 0         | 0         | 4          | 4          | 0          | 5         | 8          | 0          | 0         | 3          | 2        | 0          | 0          | 0         | 0        | 0         | 0         | 0         | 0         | 0          | 0         | 0          | 0          | 0         | 9         | 36        | 1.286     |
| EGFR                   | 0         | 4          | 0          | 0          | 0         | 0         | 0          | 4          | 4          | 2         | 0          | 4          | 0         | 8          | 0        | 6          | 0          | 0         | 0        | 2         | 0         | 2         | 0         | 0          | 0         | 0          | 0          | 0         | 9         | 36        | 1.286     |
| CDKN2A                 | 0         | 0          | 0          | 0          | 2         | 0         | 0          | 3          | 8          | 0         | 6          | 7          | 0         | 0          | 0        | 0          | 0          | 0         | 0        | 0         | 0         | 0         | 0         | 0          | 0         | 0          | 4          | 0         | 6         | 30        | 1.071     |
| PIK3CA                 | 2         | 3          | 0          | 4          | 0         | 0         | 4          | 0          | 0          | 0         | 0          | 0          | 0         | 0          | 0        | 0          | 0          | 0         | 0        | 0         | 0         | 2         | 0         | 6          | 0         | 3          | 0          | 0         | 7         | 24        | 0.857     |
| ATM                    | 0         | 0          | 5          | 0          | 2         | 0         | 0          | 0          | 0          | 0         | 4          | 0          | 0         | 0          | 0        | 6          | 0          | 0         | 0        | 3         | 3         | 0         | 0         | 0          | 0         | 0          | 0          | 0         | 6         | 23        | 0.821     |
| NFE2L2                 | 0         | 0          | 0          | 3          | 0         | 0         | 0          | 0          | 6          | 0         | 0          | 2          | 0         | 0          | 0        | 0          | 0          | 0         | 0        | 0         | 0         | 0         | 0         | 0          | 0         | 3          | 8          | 0         | 5         | 22        | 0.786     |
| RUNX1                  | 0         | 0          | 13         | 0          | 0         | 0         | 0          | 0          | 0          | 0         | 0          | 0          | 8         | 0          | 0        | 0          | 0          | 0         | 0        | 0         | 0         | 0         | 0         | 0          | 0         | 0          | 0          | 0         | 2         | 21        | 0.750     |
| VHL                    | 0         | 0          | 0          | 0          | 0         | 0         | 0          | 0          | 0          | 0         | 8          | 7          | 0         | 0          | 0        | 0          | 0          | 3         | 0        | 0         | 0         | 0         | 0         | 0          | 0         | 0          | 0          | 0         | 3         | 18        | 0.643     |
| RXRA                   | 0         | 17         | 0          | 0          | 0         | 0         | 0          | 0          | 0          | 0         | 0          | 0          | 0         | 0          | 0        | 0          | 0          | 0         | 0        | 0         | 0         | 0         | 0         | 0          | 0         | 0          | 0          | 0         | 1         | 17        | 0.607     |
| CHD8                   | 3         | 3          | 0          | 4          | 0         | 0         | 0          | 0          | 0          | 0         | 0          | 0          | 0         | 0          | 2        | 0          | 0          | 0         | 0        | 0         | 0         | 0         | 0         | 0          | 0         | 4          | 0          | 0         | 5         | 16        | 0.571     |
| SETD2                  | 2         | 3          | 0          | 3          | 0         | 0         | 0          | 0          | 0          | 0         | 0          | 0          | 0         | 0          | 0        | 0          | 0          | 0         | 0        | 0         | 0         | 0         | 0         | 0          | 0         | 3          | 0          | 0         | 4         | 11        | 0.393     |
| USP9X                  | 2         | 3          | 0          | 3          | 0         | 0         | 0          | 0          | 0          | 0         | 0          | 0          | 0         | 0          | 0        | 0          | 0          | 0         | 0        | 0         | 0         | 0         | 0         | 0          | 0         | 3          | 0          | 0         | 4         | 11        | 0.393     |
| APC                    | 0         | 0          | 5          | 0          | 0         | 0         | 0          | 0          | 0          | 0         | 0          | 0          | 0         | 0          | 0        | 6          | 0          | 0         | 0        | 0         | 0         | 0         | 0         | 0          | 0         | 0          | 0          | 0         | 2         | 11        | 0.393     |
| KLF5                   | 0         | 11         | 0          | 0          | 0         | 0         | 0          | 0          | 0          | 0         | 0          | 0          | 0         | 0          | 0        | 0          | 0          | 0         | 0        | 0         | 0         | 0         | 0         | 0          | 0         | 0          | 0          | 0         | 1         | 11        | 0.393     |
| KMT2A                  | 0         | 0          | 0          | 0          | 0         | 0         | 0          | 3          | 0          | 0         | 4          | 0          | 0         | 3          | 0        | 0          | 0          | 0         | 0        | 0         | 0         | 0         | 0         | 0          | 0         | 0          | 0          | 0         | 3         | 10        | 0.357     |
| ARID2                  | 2         | 4          | 0          | 0          | 0         | 0         | 0          | 0          | 0          | 2         | 0          | 0          | 0         | 0          | 0        | 0          | 0          | 0         | 0        | 0         | 0         | 0         | 0         | 0          | 0         | 0          | 0          | 0         | 3         | 8         | 0.286     |
| KMT2B                  | 2         | 3          | 0          | 0          | 0         | 0         | 0          | 0          | 0          | 0         | 0          | 0          | 0         | 0          | 0        | 0          | 0          | 0         | 0        | 0         | 0         | 0         | 0         | 0          | 0         | 3          | 0          | 0         | 3         | 8         | 0.286     |
| TLR4                   | 2         | 3          | 0          | 0          | 0         | 0         | 0          | 0          | 0          | 0         | 0          | 0          | 0         | 0          | 0        | 0          | 0          | 0         | 0        | 0         | 0         | 0         | 0         | 0          | 0         | 3          | 0          | 0         | 3         | 8         | 0.286     |
| KEAP1                  | 0         | 0          | 0          | 0          | 0         | 0         | 0          | 0          | 0          | 0         | 0          | 0          | 0         | 0          | 0        | 4          | 4          | 0         | 0        | 0         | 0         | 0         | 0         | 0          | 0         | 0          | 0          | 0         | 2         | 8         | 0.286     |
| CDKN1A                 | 0         | 7          | 0          | 0          | 0         | 0         | 0          | 0          | 0          | 0         | 0          | 0          | 0         | 0          | 0        | 0          | 0          | 0         | 0        | 0         | 0         | 0         | 0         | 0          | 0         | 0          | 0          | 0         | 1         | 7         | 0.250     |
| MEN1                   | 7         | 0          | 0          | 0          | 0         | 0         | 0          | 0          | 0          | 0         | 0          | 0          | 0         | 0          | 0        | 0          | 0          | 0         | 0        | 0         | 0         | 0         | 0         | 0          | 0         | 0          | 0          | 0         | 1         | 7         | 0.250     |
| AJUBA                  | 0         | 0          | 0          | 0          | 0         | 0         | 0          | 0          | 4          | 0         | 0          | 0          | 0         | 0          | 0        | 0          | 0          | 0         | 0        | 0         | 0         | 0         | 0         | 0          | 0         | 0          | 0          | 0         | 1         | 4         | 0.143     |
| SIN3A                  | 0         | 0          | 0          | 0          | 0         | 0         | 0          | 0          | 0          | 0         | 0          | 0          | 0         | 0          | 0        | 0          | 0          | 0         | 0        | 0         | 0         | 0         | 0         | 0          | 0         | 0          | 4          | 0         | 1         | 4         | 0.143     |
| CTCF                   | 0         | 0          | 0          | 0          | 0         | 0         | 0          | 0          | 0          | 0         | 0          | 0          | 0         | 0          | 0        | 0          | 0          | 0         | 0        | 0         | 0         | 0         | 0         | 0          | 0         | 0          | 3          | 0         | 1         | 3         | 0.107     |
| KANSL1                 | 0         | 3          | 0          | 0          | 0         | 0         | 0          | 0          | 0          | 0         | 0          | 0          | 0         | 0          | 0        | 0          | 0          | 0         | 0        | 0         | 0         | 0         | 0         | 0          | 0         | 0          | 0          | 0         | 1         | 3         | 0.107     |
| <b>N drivers/tumor</b> | <b>22</b> | <b>26</b>  | <b>17</b>  | <b>18</b>  | <b>12</b> | <b>8</b>  | <b>15</b>  | <b>16</b>  | <b>18</b>  | <b>15</b> | <b>20</b>  | <b>17</b>  | <b>11</b> | <b>14</b>  | <b>4</b> | <b>15</b>  | <b>13</b>  | <b>10</b> | <b>4</b> | <b>14</b> | <b>11</b> | <b>14</b> | <b>8</b>  | <b>13</b>  | <b>7</b>  | <b>23</b>  | <b>15</b>  | <b>8</b>  |           |           |           |
| <b>N tum int</b>       | <b>87</b> | <b>236</b> | <b>190</b> | <b>155</b> | <b>31</b> | <b>48</b> | <b>104</b> | <b>121</b> | <b>234</b> | <b>65</b> | <b>196</b> | <b>139</b> | <b>92</b> | <b>116</b> | <b>8</b> | <b>137</b> | <b>163</b> | <b>57</b> | <b>9</b> | <b>69</b> | <b>84</b> | <b>52</b> | <b>39</b> | <b>130</b> | <b>37</b> | <b>185</b> | <b>102</b> | <b>35</b> |           |           |           |

Drivers identified in the study and number of TF they interact with in any given cancer. The table also reports the following Pan-Cancer and tumor specific analyses (bold red): number of tumors in which the driver is active ("In tumors"); total number of TFs regulated by the driver Pan-Cancer ("N tot int"); average number of TFs regulated by the driver Pan-Cancer ("N avg int"); number of active drivers in any tumor ("N drivers/tumor"); number of TFs regulated by the driver in any given cancer ("N tum int").



**Supplemental Table 9. KEGG Pathways enrichment of matrisome regulators (drivers + TFs)**

| Pathway                                 | ACC   | BLCA  | BRCA  | CESC  | CHOL  | COAD  | ESCA  | GBM   | HNSC  | KICH  | KIRC  | KIRP  | LAML  | LGG   | LUAD  | LUSC  | MESO  | PAAD  | PCPG  | PRAD  | READ  | SARC  | STAD  | TGCT  | THCA  | UCEC  | UCS   | In tumors |           |
|-----------------------------------------|-------|-------|-------|-------|-------|-------|-------|-------|-------|-------|-------|-------|-------|-------|-------|-------|-------|-------|-------|-------|-------|-------|-------|-------|-------|-------|-------|-----------|-----------|
| Adherens junction                       | 12.28 | 10.90 | 10.33 | 11.51 | 9.85  | 11.80 | 14.40 | 14.29 | 17.19 | 12.86 | 17.06 | 12.56 | 11.10 | 15.41 | 14.94 | 13.65 | 12.19 | 11.70 | 11.58 | 11.07 | 12.75 | 6.02  | 13.34 | 11.27 | 7.92  | 15.61 | 12.83 | <b>27</b> |           |
| Cell cycle                              | 15.93 | 17.26 | 13.36 | 15.06 | 21.46 | 15.38 | 14.40 | 17.18 | 13.68 | 16.63 | 16.61 | 13.03 | 11.42 | 15.51 | 14.94 | 11.16 | 15.98 | 9.76  | 18.02 | 17.52 | 13.24 | 10.89 | 13.28 | 9.00  | 13.89 | 12.76 | 4.86  | <b>27</b> |           |
| FoxO signaling pathway                  | 9.88  | 14.24 | 7.95  | 11.94 | 14.31 | 12.28 | 11.52 | 11.28 | 10.97 | 13.42 | 10.80 | 7.31  | 11.42 | 9.56  | 14.94 | 8.50  | 6.92  | 9.76  | 14.99 | 11.32 | 10.37 | 4.57  | 7.83  | 4.00  | 8.46  | 4.34  | 4.86  | <b>27</b> |           |
| MicroRNAs in cancer                     | 15.08 | 22.06 | 14.92 | 22.96 | 23.67 | 20.82 | 19.10 | 18.92 | 21.33 | 18.89 | 21.15 | 12.49 | 19.06 | 17.74 | 23.42 | 12.81 | 15.17 | 12.51 | 30.31 | 18.96 | 15.46 | 12.90 | 17.38 | 8.49  | 15.65 | 9.12  | 6.92  | <b>27</b> |           |
| Wnt signaling pathway                   | 15.39 | 10.64 | 10.09 | 11.45 | 10.56 | 11.77 | 10.94 | 10.77 | 12.99 | 12.88 | 15.83 | 9.69  | 10.95 | 14.95 | 11.32 | 7.98  | 9.23  | 16.14 | 11.47 | 10.94 | 12.75 | 7.06  | 12.61 | 8.63  | 10.19 | 12.34 | 12.96 | <b>27</b> |           |
| Notch signaling pathway                 | 6.90  | 6.04  | 5.69  | 6.51  | 7.40  | 6.54  | 9.48  | 6.04  | 5.92  | 10.78 | 5.75  | 7.03  | 6.10  | 6.71  | 6.63  | 9.06  | 6.75  | 8.77  | 9.76  | 0.00  | 7.01  | 10.97 | 5.79  | 6.34  | 6.20  | 6.81  | 3.94  | <b>26</b> |           |
| TGF-beta signaling pathway              | 5.74  | 7.48  | 7.10  | 8.08  | 6.19  | 5.39  | 10.75 | 7.56  | 7.28  | 5.90  | 7.21  | 8.86  | 4.90  | 5.60  | 8.14  | 4.49  | 8.42  | 7.73  | 4.99  | 4.70  | 12.32 | 3.11  | 7.04  | 0.00  | 7.58  | 5.60  | 3.26  | <b>26</b> |           |
| Transcriptional misregulation in cancer | 14.22 | 23.45 | 22.15 | 10.42 | 12.75 | 10.73 | 12.41 | 27.33 | 20.15 | 11.88 | 26.23 | 11.77 | 27.84 | 13.69 | 18.83 | 17.55 | 20.32 | 0.00  | 13.12 | 18.02 | 11.83 | 12.30 | 16.57 | 16.15 | 20.51 | 8.60  | 6.74  | <b>26</b> |           |
| HIF-1 signaling pathway                 | 10.52 | 18.27 | 8.56  | 16.00 | 15.03 | 12.97 | 12.23 | 12.12 | 14.64 | 14.10 | 11.62 | 7.86  | 9.30  | 10.10 | 15.83 | 3.88  | 10.41 | 10.24 | 9.76  | 9.40  | 14.01 | 0.00  | 11.34 | 7.01  | 14.83 | 0.00  | 5.24  | <b>25</b> |           |
| Proteoglycans in cancer                 | 7.37  | 10.55 | 3.70  | 6.68  | 3.54  | 9.23  | 6.06  | 6.04  | 5.77  | 10.46 | 5.55  | 5.26  | 6.12  | 4.97  | 6.70  | 3.88  | 0.00  | 7.91  | 6.48  | 6.10  | 10.37 | 0.00  | 5.59  | 0.00  | 4.16  | 0.00  | 5.75  | <b>23</b> |           |
| p53 signaling pathway                   | 6.09  | 8.02  | 4.87  | 5.62  | 13.68 | 5.77  | 5.23  | 11.20 | 5.07  | 6.21  | 10.80 | 3.09  | 0.00  | 5.93  | 5.77  | 0.00  | 5.97  | 0.00  | 11.76 | 11.21 | 3.31  | 3.32  | 4.95  | 0.00  | 5.29  | 0.00  | 0.00  | <b>21</b> |           |
| Apoptosis                               | 8.34  | 7.18  | 4.29  | 7.84  | 5.97  | 7.93  | 4.67  | 4.53  | 6.97  | 8.77  | 4.28  | 0.00  | 4.70  | 8.09  | 10.70 | 0.00  | 8.23  | 4.14  | 0.00  | 0.00  | 0.00  | 3.00  | 6.78  | 9.72  | 9.72  | 0.00  | 0.00  | <b>20</b> |           |
| Hippo signaling pathway                 | 6.46  | 3.24  | 4.96  | 3.71  | 0.00  | 3.84  | 5.38  | 7.71  | 7.37  | 0.00  | 7.29  | 0.00  | 3.26  | 6.26  | 3.71  | 0.00  | 6.29  | 3.26  | 3.38  | 0.00  | 4.10  | 0.00  | 7.10  | 0.00  | 0.00  | 3.82  | 4.36  | <b>19</b> |           |
| PI3K-Akt signaling pathway              | 3.75  | 7.96  | 0.00  | 4.97  | 6.59  | 5.20  | 4.52  | 4.36  | 4.17  | 5.97  | 3.90  | 0.00  | 4.56  | 3.51  | 8.88  | 0.00  | 0.00  | 4.01  | 4.72  | 0.00  | 3.84  | 0.00  | 0.00  | 0.00  | 4.37  | 0.00  | 0.00  | <b>17</b> |           |
| Jak-STAT signaling pathway              | 3.93  | 3.13  | 0.00  | 5.68  | 0.00  | 5.85  | 5.23  | 0.00  | 4.99  | 4.13  | 0.00  | 3.85  | 5.28  | 3.72  | 5.79  | 0.00  | 0.00  | 5.84  | 0.00  | 0.00  | 6.43  | 0.00  | 0.00  | 3.39  | 3.20  | 0.00  | 4.29  | <b>16</b> |           |
| ErbB signaling pathway                  | 0.00  | 4.59  | 0.00  | 5.05  | 3.13  | 5.20  | 4.68  | 0.00  | 4.53  | 3.13  | 4.28  | 0.00  | 4.71  | 0.00  | 5.20  | 0.00  | 0.00  | 0.00  | 4.83  | 0.00  | 5.54  | 0.00  | 0.00  | 0.00  | 0.00  | 0.00  | 3.14  | <b>13</b> |           |
| Neurotrophin signaling pathway          | 4.71  | 3.85  | 0.00  | 4.37  | 0.00  | 4.46  | 0.00  | 0.00  | 3.78  | 4.92  | 0.00  | 0.00  | 0.00  | 4.50  | 6.73  | 0.00  | 4.61  | 3.68  | 0.00  | 0.00  | 0.00  | 0.00  | 3.53  | 0.00  | 6.22  | 0.00  | 0.00  | <b>12</b> |           |
| MAPK signaling pathway                  | 0.00  | 0.00  | 0.00  | 0.00  | 3.20  | 4.40  | 3.73  | 3.59  | 3.53  | 3.09  | 4.98  | 0.00  | 0.00  | 6.52  | 6.12  | 0.00  | 0.00  | 0.00  | 0.00  | 0.00  | 0.00  | 0.00  | 0.00  | 0.00  | 0.00  | 3.70  | 0.00  | 0.00      | <b>10</b> |
| Prolactin signaling pathway             | 3.21  | 0.00  | 0.00  | 5.51  | 0.00  | 5.67  | 0.00  | 0.00  | 4.99  | 3.42  | 0.00  | 0.00  | 0.00  | 5.85  | 8.55  | 0.00  | 3.24  | 0.00  | 0.00  | 0.00  | 3.25  | 0.00  | 0.00  | 0.00  | 5.25  | 0.00  | 0.00  | <b>10</b> |           |
| Toll-like receptor signaling pathway    | 5.02  | 4.15  | 0.00  | 4.64  | 0.00  | 4.74  | 0.00  | 0.00  | 4.09  | 5.23  | 0.00  | 0.00  | 0.00  | 0.00  | 7.16  | 0.00  | 0.00  | 3.84  | 0.00  | 0.00  | 0.00  | 0.00  | 3.83  | 0.00  | 6.64  | 0.00  | 0.00  | <b>10</b> |           |
| Focal adhesion                          | 0.00  | 0.00  | 0.00  | 3.01  | 0.00  | 3.10  | 0.00  | 0.00  | 0.00  | 3.50  | 0.00  | 0.00  | 0.00  | 0.00  | 3.00  | 4.64  | 3.36  | 0.00  | 4.64  | 0.00  | 3.36  | 0.00  | 0.00  | 0.00  | 0.00  | 0.00  | 0.00  | <b>8</b>  |           |
| Estrogen signaling pathway              | 0.00  | 4.33  | 0.00  | 4.81  | 0.00  | 0.00  | 4.47  | 0.00  | 4.26  | 0.00  | 0.00  | 0.00  | 0.00  | 0.00  | 0.00  | 0.00  | 0.00  | 0.00  | 0.00  | 0.00  | 5.26  | 0.00  | 0.00  | 0.00  | 0.00  | 0.00  | 0.00  | <b>5</b>  |           |
| NOD-like receptor signaling pathway     | 0.00  | 0.00  | 0.00  | 0.00  | 0.00  | 0.00  | 0.00  | 0.00  | 0.00  | 0.00  | 0.00  | 0.00  | 0.00  | 3.38  | 3.35  | 0.00  | 3.45  | 0.00  | 0.00  | 0.00  | 0.00  | 0.00  | 0.00  | 0.00  | 3.07  | 0.00  | 0.00  | <b>4</b>  |           |
| Rap1 signaling pathway                  | 0.00  | 0.00  | 0.00  | 3.00  | 0.00  | 3.10  | 0.00  | 0.00  | 0.00  | 3.50  | 0.00  | 0.00  | 0.00  | 0.00  | 0.00  | 0.00  | 0.00  | 0.00  | 0.00  | 0.00  | 3.36  | 0.00  | 0.00  | 0.00  | 0.00  | 0.00  | 0.00  | <b>4</b>  |           |
| TNF signaling pathway                   | 0.00  | 0.00  | 0.00  | 4.56  | 0.00  | 0.00  | 0.00  | 0.00  | 0.00  | 0.00  | 0.00  | 0.00  | 0.00  | 0.00  | 4.60  | 0.00  | 4.78  | 0.00  | 0.00  | 0.00  | 0.00  | 0.00  | 0.00  | 0.00  | 4.15  | 0.00  | 0.00  | <b>4</b>  |           |
| Ras signaling pathway                   | 0.00  | 0.00  | 0.00  | 0.00  | 0.00  | 0.00  | 0.00  | 0.00  | 0.00  | 3.40  | 0.00  | 0.00  | 0.00  | 3.02  | 4.68  | 0.00  | 0.00  | 0.00  | 0.00  | 0.00  | 0.00  | 0.00  | 0.00  | 0.00  | 0.00  | 0.00  | 0.00  | <b>3</b>  |           |
| mTOR signaling pathway                  | 0.00  | 0.00  | 0.00  | 0.00  | 3.65  | 0.00  | 0.00  | 0.00  | 0.00  | 0.00  | 0.00  | 0.00  | 0.00  | 0.00  | 3.28  | 0.00  | 0.00  | 0.00  | 0.00  | 0.00  | 0.00  | 0.00  | 0.00  | 0.00  | 0.00  | 0.00  | 0.00  | <b>2</b>  |           |
| T cell receptor signaling pathway       | 0.00  | 0.00  | 0.00  | 0.00  | 0.00  | 0.00  | 0.00  | 0.00  | 0.00  | 0.00  | 0.00  | 0.00  | 0.00  | 0.00  | 4.77  | 0.00  | 0.00  | 0.00  | 0.00  | 0.00  | 0.00  | 0.00  | 0.00  | 0.00  | 4.34  | 0.00  | 0.00  | <b>2</b>  |           |
| AMPK signaling pathway                  | 0.00  | 3.77  | 0.00  | 0.00  | 0.00  | 0.00  | 0.00  | 0.00  | 0.00  | 0.00  | 0.00  | 0.00  | 0.00  | 0.00  | 0.00  | 0.00  | 0.00  | 0.00  | 0.00  | 0.00  | 0.00  | 0.00  | 0.00  | 0.00  | 0.00  | 0.00  | 0.00  | <b>1</b>  |           |
| Oxytocin signaling pathway              | 0.00  | 3.15  | 0.00  | 0.00  | 0.00  | 0.00  | 0.00  | 0.00  | 0.00  | 0.00  | 0.00  | 0.00  | 0.00  | 0.00  | 0.00  | 0.00  | 0.00  | 0.00  | 0.00  | 0.00  | 0.00  | 0.00  | 0.00  | 0.00  | 0.00  | 0.00  | 0.00  | <b>1</b>  |           |
| Tight junction                          | 0.00  | 0.00  | 0.00  | 0.00  | 0.00  | 0.00  | 0.00  | 0.00  | 0.00  | 0.00  | 0.00  | 0.00  | 0.00  | 0.00  | 0.00  | 0.00  | 0.00  | 0.00  | 3.72  | 0.00  | 0.00  | 0.00  | 0.00  | 0.00  | 0.00  | 0.00  | 0.00  | <b>1</b>  |           |

KEGG pathways enrichment in drivers + TF for any given cancer type. Data are reported as  $(-\log_{10}(\text{FDR}))$ . The table also reports the following Pan-Cancer analysis (bold red): number of tumors in which the pathway is enriched (“In tumors”)

**Supplemental Table 10. Druggability of the cancer matrisome**

| <b>drug name</b>   | <b>tumor type</b> | <b>mechanism</b> | <b>use</b> | <b>molecular target</b> |
|--------------------|-------------------|------------------|------------|-------------------------|
| THIOTEPA           | ACC               | ctx              | off label  | specific master         |
| CAPECITABINE       | ACC               | ctx              | off label  | specific master         |
| CYCLOPHOSPHAMIDE   | ACC               | ctx              | off label  | specific master         |
| DOCETAXEL          | ACC               | ctx              | off label  | specific master         |
| EPIRUBICIN         | ACC               | ctx              | off label  | specific master         |
| EVEROLIMUS         | ACC               | tgt              | off label  | specific master         |
| GEMCITABINE        | ACC               | ctx              | off label  | specific master         |
| LETROZOLE          | ACC               | tgt              | off label  | specific master         |
| PACLITAXEL         | ACC               | ctx              | off label  | specific master         |
| BEVACIZUMAB        | ACC               | tgt              | off label  | specific master         |
| CETUXIMAB          | ACC               | tgt              | off label  | specific master         |
| IRINOTECAN         | ACC               | ctx              | off label  | specific master         |
| OXALIPLATIN        | ACC               | ctx              | off label  | specific master         |
| PANITUMUMAB        | ACC               | tgt              | off label  | specific master         |
| TEMOZOLOMIDE       | ACC               | ctx              | off label  | specific master         |
| TEMSIROLIMUS       | ACC               | tgt              | off label  | specific master         |
| CRIZOTINIB         | ACC               | tgt              | off label  | specific master         |
| ETOPOSIDE          | ACC               | ctx              | off label  | specific master         |
| CARBOPLATIN        | ACC               | ctx              | off label  | specific master         |
| OLAPARIB           | ACC               | tgt              | off label  | specific master         |
| MITOMYCIN          | ACC               | ctx              | off label  | specific master         |
| DABRAFENIB         | ACC               | tgt              | off label  | specific master         |
| PEMBROLIZUMAB      | ACC               | tgt              | off label  | specific master         |
| TRAMETINIB         | ACC               | tgt              | off label  | specific master         |
| VEMURAFENIB        | ACC               | tgt              | off label  | specific master         |
| IFOSFAMIDE         | ACC               | ctx              | off label  | specific master         |
| LEUPROLIDE ACETATE | ACC               | tgt              | off label  | transcription factor    |
| THIOTEPA           | BLCA              | ctx              | on label   | specific master         |
| CAPECITABINE       | BLCA              | ctx              | off label  | specific master         |
| CYCLOPHOSPHAMIDE   | BLCA              | ctx              | off label  | specific master         |
| DOCETAXEL          | BLCA              | ctx              | off label  | specific master         |
| EPIRUBICIN         | BLCA              | ctx              | off label  | specific master         |
| EVEROLIMUS         | BLCA              | tgt              | off label  | specific master         |
| FLUOROURACIL       | BLCA              | ctx              | off label  | specific master         |
| FULVESTRANT        | BLCA              | tgt              | off label  | specific master         |
| GEMCITABINE        | BLCA              | ctx              | off label  | specific master         |
| LETROZOLE          | BLCA              | tgt              | off label  | specific master         |

|                    |      |     |           |                      |
|--------------------|------|-----|-----------|----------------------|
| METHOTREXATE       | BLCA | ctx | off label | specific master      |
| PACLITAXEL         | BLCA | ctx | off label | specific master      |
| PERTUZUMAB         | BLCA | tgt | off label | specific master      |
| THIOTEPA           | BLCA | ctx | off label | specific master      |
| TRASTUZUMAB        | BLCA | tgt | off label | specific master      |
| BEVACIZUMAB        | BLCA | tgt | off label | specific master      |
| CETUXIMAB          | BLCA | tgt | off label | specific master      |
| IRINOTECAN         | BLCA | ctx | off label | specific master      |
| OXALIPLATIN        | BLCA | ctx | off label | specific master      |
| PANITUMUMAB        | BLCA | tgt | off label | specific master      |
| REGORAFENIB        | BLCA | tgt | off label | specific master      |
| TEMOZOLOMIDE       | BLCA | ctx | off label | specific master      |
| TEMSIROLIMUS       | BLCA | tgt | off label | specific master      |
| CRIZOTINIB         | BLCA | tgt | off label | specific master      |
| ETOPOSIDE          | BLCA | ctx | off label | specific master      |
| CARBOPLATIN        | BLCA | ctx | off label | specific master      |
| MELPHALAN          | BLCA | ctx | off label | specific master      |
| OLAPARIB           | BLCA | tgt | off label | specific master      |
| MITOMYCIN          | BLCA | ctx | off label | specific master      |
| FLUTAMIDE          | BLCA | tgt | off label | specific master      |
| DABRAFENIB         | BLCA | tgt | off label | specific master      |
| PEMBROLIZUMAB      | BLCA | tgt | off label | specific master      |
| TRAMETINIB         | BLCA | tgt | off label | specific master      |
| VEMURAFENIB        | BLCA | tgt | off label | specific master      |
| FLOXURIDINE        | BLCA | ctx | off label | specific master      |
| IFOSFAMIDE         | BLCA | ctx | off label | specific master      |
| CABOZANTINIB       | BLCA | tgt | off label | specific master      |
| VANDETANIB         | BLCA | tgt | off label | specific master      |
| BICALUTAMIDE       | BLCA | tgt | off label | transcription factor |
| LEUPROLIDE ACETATE | BLCA | tgt | off label | transcription factor |
| OXALIPLATIN        | BLCA | ctx | off label | matrisome            |
| THIOTEPA           | BRCA | ctx | off label | specific master      |
| CAPECITABINE       | BRCA | ctx | on label  | specific master      |
| CYCLOPHOSPHAMIDE   | BRCA | ctx | on label  | specific master      |
| DOCETAXEL          | BRCA | ctx | on label  | specific master      |
| EPIRUBICIN         | BRCA | ctx | on label  | specific master      |
| EVEROLIMUS         | BRCA | tgt | on label  | specific master      |
| FLUOROURACIL       | BRCA | ctx | on label  | specific master      |
| FULVESTRANT        | BRCA | tgt | on label  | specific master      |
| GEMCITABINE        | BRCA | ctx | on label  | specific master      |
| LETROZOLE          | BRCA | tgt | on label  | specific master      |

|                    |      |     |           |                      |
|--------------------|------|-----|-----------|----------------------|
| PACLITAXEL         | BRCA | ctx | on label  | specific master      |
| PERTUZUMAB         | BRCA | tgt | on label  | specific master      |
| THIOTEPA           | BRCA | ctx | on label  | specific master      |
| TRASTUZUMAB        | BRCA | tgt | on label  | specific master      |
| BEVACIZUMAB        | BRCA | tgt | off label | specific master      |
| CAPECITABINE       | BRCA | ctx | off label | specific master      |
| CETUXIMAB          | BRCA | tgt | off label | specific master      |
| FLUOROURACIL       | BRCA | ctx | off label | specific master      |
| IRINOTECAN         | BRCA | ctx | off label | specific master      |
| OXALIPLATIN        | BRCA | ctx | off label | specific master      |
| PANITUMUMAB        | BRCA | tgt | off label | specific master      |
| REGORAFENIB        | BRCA | tgt | off label | specific master      |
| CYCLOPHOSPHAMIDE   | BRCA | ctx | off label | specific master      |
| DOCETAXEL          | BRCA | ctx | off label | specific master      |
| EVEROLIMUS         | BRCA | tgt | off label | specific master      |
| TEMOZOLOMIDE       | BRCA | ctx | off label | specific master      |
| TEMSIROLIMUS       | BRCA | tgt | off label | specific master      |
| CRIZOTINIB         | BRCA | tgt | off label | specific master      |
| ETOPOSIDE          | BRCA | ctx | off label | specific master      |
| GEMCITABINE        | BRCA | ctx | off label | specific master      |
| PACLITAXEL         | BRCA | ctx | off label | specific master      |
| CARBOPLATIN        | BRCA | ctx | off label | specific master      |
| OLAPARIB           | BRCA | tgt | off label | specific master      |
| MITOMYCIN          | BRCA | ctx | off label | specific master      |
| DABRAFENIB         | BRCA | tgt | off label | specific master      |
| PEMBROLIZUMAB      | BRCA | tgt | off label | specific master      |
| TRAMETINIB         | BRCA | tgt | off label | specific master      |
| VEMURAFENIB        | BRCA | tgt | off label | specific master      |
| FLOXURIDINE        | BRCA | ctx | off label | specific master      |
| TRASTUZUMAB        | BRCA | tgt | off label | specific master      |
| IFOSFAMIDE         | BRCA | ctx | off label | specific master      |
| CABOZANTINIB       | BRCA | tgt | off label | specific master      |
| CETUXIMAB          | BRCA | tgt | off label | transcription factor |
| BICALUTAMIDE       | BRCA | tgt | off label | transcription factor |
| LEUPROLIDE ACETATE | BRCA | tgt | off label | transcription factor |
| THIOTEPA           | CESC | ctx | off label | specific master      |
| CAPECITABINE       | CESC | ctx | off label | specific master      |
| CYCLOPHOSPHAMIDE   | CESC | ctx | off label | specific master      |
| DOCETAXEL          | CESC | ctx | off label | specific master      |
| EPIRUBICIN         | CESC | ctx | off label | specific master      |
| EVEROLIMUS         | CESC | tgt | off label | specific master      |

|                    |      |     |           |                      |
|--------------------|------|-----|-----------|----------------------|
| FLUOROURACIL       | CESC | ctx | off label | specific master      |
| FULVESTRANT        | CESC | tgt | off label | specific master      |
| GEMCITABINE        | CESC | ctx | off label | specific master      |
| LETROZOLE          | CESC | tgt | off label | specific master      |
| METHOTREXATE       | CESC | ctx | off label | specific master      |
| PACLITAXEL         | CESC | ctx | off label | specific master      |
| PERTUZUMAB         | CESC | tgt | off label | specific master      |
| TRASTUZUMAB        | CESC | tgt | off label | specific master      |
| BEVACIZUMAB        | CESC | tgt | off label | specific master      |
| CETUXIMAB          | CESC | tgt | off label | specific master      |
| IRINOTECAN         | CESC | ctx | off label | specific master      |
| OXALIPLATIN        | CESC | ctx | off label | specific master      |
| PANITUMUMAB        | CESC | tgt | off label | specific master      |
| REGORAFENIB        | CESC | tgt | off label | specific master      |
| TEMOZOLOMIDE       | CESC | ctx | off label | specific master      |
| TEMSIROLIMUS       | CESC | tgt | off label | specific master      |
| CRIZOTINIB         | CESC | tgt | off label | specific master      |
| ETOPOSIDE          | CESC | ctx | off label | specific master      |
| CARBOPLATIN        | CESC | ctx | off label | specific master      |
| OLAPARIB           | CESC | tgt | off label | specific master      |
| MITOMYCIN          | CESC | ctx | off label | specific master      |
| DABRAFENIB         | CESC | tgt | off label | specific master      |
| PEMBROLIZUMAB      | CESC | tgt | off label | specific master      |
| TRAMETINIB         | CESC | tgt | off label | specific master      |
| VEMURAFENIB        | CESC | tgt | off label | specific master      |
| FLOXURIDINE        | CESC | ctx | off label | specific master      |
| IFOSFAMIDE         | CESC | ctx | off label | specific master      |
| CABOZANTINIB       | CESC | tgt | off label | specific master      |
| BICALUTAMIDE       | CESC | tgt | off label | transcription factor |
| LEUPROLIDE ACETATE | CESC | tgt | off label | transcription factor |
| PACLITAXEL         | CESC | ctx | off label | matrisome            |
| TRASTUZUMAB        | CESC | tgt | off label | matrisome            |
| CETUXIMAB          | CESC | tgt | off label | matrisome            |
| CARMUSTINE         | CESC | ctx | off label | matrisome            |
| GEFITINIB          | CESC | tgt | off label | matrisome            |
| DACARBAZINE        | CESC | ctx | off label | matrisome            |
| TRASTUZUMAB        | CHOL | tgt | off label | specific master      |
| THIOTEPA           | CHOL | ctx | off label | transcription factor |
| CAPECITABINE       | CHOL | ctx | off label | transcription factor |
| CYCLOPHOSPHAMIDE   | CHOL | ctx | off label | transcription factor |
| DOCETAXEL          | CHOL | ctx | off label | transcription factor |

|                  |          |     |           |                      |
|------------------|----------|-----|-----------|----------------------|
| EPIRUBICIN       | CHOL     | ctx | off label | transcription factor |
| GEMCITABINE      | CHOL     | ctx | off label | transcription factor |
| PACLITAXEL       | CHOL     | ctx | off label | transcription factor |
| BEVACIZUMAB      | CHOL     | tgt | off label | transcription factor |
| CETUXIMAB        | CHOL     | tgt | off label | transcription factor |
| IRINOTECAN       | CHOL     | ctx | off label | transcription factor |
| OXALIPLATIN      | CHOL     | ctx | off label | transcription factor |
| PANITUMUMAB      | CHOL     | tgt | off label | transcription factor |
| TEMOZOLOMIDE     | CHOL     | ctx | off label | transcription factor |
| CRIZOTINIB       | CHOL     | tgt | off label | transcription factor |
| ETOPOSIDE        | CHOL     | ctx | off label | transcription factor |
| CARBOPLATIN      | CHOL     | ctx | off label | transcription factor |
| OLAPARIB         | CHOL     | tgt | off label | transcription factor |
| MITOMYCIN        | CHOL     | ctx | off label | transcription factor |
| DABRAFENIB       | CHOL     | tgt | off label | transcription factor |
| PEMBROLIZUMAB    | CHOL     | tgt | off label | transcription factor |
| TRAMETINIB       | CHOL     | tgt | off label | transcription factor |
| VEMURAFENIB      | CHOL     | tgt | off label | transcription factor |
| IFOSFAMIDE       | CHOL     | ctx | off label | transcription factor |
| THIOTEPA         | COADREAD | ctx | off label | specific master      |
| CAPECITABINE     | COADREAD | ctx | off label | specific master      |
| CYCLOPHOSPHAMIDE | COADREAD | ctx | off label | specific master      |
| DOCETAXEL        | COADREAD | ctx | off label | specific master      |
| EPIRUBICIN       | COADREAD | ctx | off label | specific master      |
| EVEROLIMUS       | COADREAD | tgt | off label | specific master      |
| FLUOROURACIL     | COADREAD | ctx | off label | specific master      |
| FULVESTRANT      | COADREAD | tgt | off label | specific master      |
| GEMCITABINE      | COADREAD | ctx | off label | specific master      |
| LETROZOLE        | COADREAD | tgt | off label | specific master      |
| PACLITAXEL       | COADREAD | ctx | off label | specific master      |
| PERTUZUMAB       | COADREAD | tgt | off label | specific master      |
| TRASTUZUMAB      | COADREAD | tgt | off label | specific master      |
| BEVACIZUMAB      | COADREAD | tgt | on label  | specific master      |
| CAPECITABINE     | COADREAD | ctx | on label  | specific master      |
| CETUXIMAB        | COADREAD | tgt | on label  | specific master      |
| FLUOROURACIL     | COADREAD | ctx | on label  | specific master      |
| IRINOTECAN       | COADREAD | ctx | on label  | specific master      |
| OXALIPLATIN      | COADREAD | ctx | on label  | specific master      |
| PANITUMUMAB      | COADREAD | tgt | on label  | specific master      |
| REGORAFENIB      | COADREAD | tgt | on label  | specific master      |
| BEVACIZUMAB      | COADREAD | tgt | off label | specific master      |

|                    |          |     |           |                      |
|--------------------|----------|-----|-----------|----------------------|
| TEMOZOLOMIDE       | COADREAD | ctx | off label | specific master      |
| CETUXIMAB          | COADREAD | tgt | off label | specific master      |
| TEMSIROLIMUS       | COADREAD | tgt | off label | specific master      |
| CRIZOTINIB         | COADREAD | tgt | off label | specific master      |
| ETOPOSIDE          | COADREAD | ctx | off label | specific master      |
| CARBOPLATIN        | COADREAD | ctx | off label | specific master      |
| OLAPARIB           | COADREAD | tgt | off label | specific master      |
| MITOMYCIN          | COADREAD | ctx | off label | specific master      |
| DABRAFENIB         | COADREAD | tgt | off label | specific master      |
| PEMBROLIZUMAB      | COADREAD | tgt | off label | specific master      |
| TRAMETINIB         | COADREAD | tgt | off label | specific master      |
| VEMURAFENIB        | COADREAD | tgt | off label | specific master      |
| FLOXURIDINE        | COADREAD | ctx | off label | specific master      |
| REGORAFENIB        | COADREAD | tgt | off label | specific master      |
| IFOSFAMIDE         | COADREAD | ctx | off label | specific master      |
| CABOZANTINIB       | COADREAD | tgt | off label | specific master      |
| LEUPROLIDE ACETATE | COADREAD | tgt | off label | transcription factor |
| THIOTEPA           | ESCA     | ctx | off label | specific master      |
| CAPECITABINE       | ESCA     | ctx | off label | specific master      |
| CYCLOPHOSPHAMIDE   | ESCA     | ctx | off label | specific master      |
| DOCETAXEL          | ESCA     | ctx | off label | specific master      |
| EPIRUBICIN         | ESCA     | ctx | off label | specific master      |
| EVEROLIMUS         | ESCA     | tgt | off label | specific master      |
| FLUOROURACIL       | ESCA     | ctx | off label | specific master      |
| FULVESTRANT        | ESCA     | tgt | off label | specific master      |
| GEMCITABINE        | ESCA     | ctx | off label | specific master      |
| LETROZOLE          | ESCA     | tgt | off label | specific master      |
| METHOTREXATE       | ESCA     | ctx | off label | specific master      |
| PACLITAXEL         | ESCA     | ctx | off label | specific master      |
| PERTUZUMAB         | ESCA     | tgt | off label | specific master      |
| TRASTUZUMAB        | ESCA     | tgt | off label | specific master      |
| BEVACIZUMAB        | ESCA     | tgt | off label | specific master      |
| CETUXIMAB          | ESCA     | tgt | off label | specific master      |
| IRINOTECAN         | ESCA     | ctx | off label | specific master      |
| OXALIPLATIN        | ESCA     | ctx | off label | specific master      |
| PANITUMUMAB        | ESCA     | tgt | off label | specific master      |
| REGORAFENIB        | ESCA     | tgt | off label | specific master      |
| TEMOZOLOMIDE       | ESCA     | ctx | off label | specific master      |
| TEMSIROLIMUS       | ESCA     | tgt | off label | specific master      |
| CRIZOTINIB         | ESCA     | tgt | off label | specific master      |
| ETOPOSIDE          | ESCA     | ctx | off label | specific master      |

|                      |      |     |           |                      |
|----------------------|------|-----|-----------|----------------------|
| CARBOPLATIN          | ESCA | ctx | off label | specific master      |
| OLAPARIB             | ESCA | tgt | off label | specific master      |
| MITOMYCIN            | ESCA | ctx | off label | specific master      |
| DABRAFENIB           | ESCA | tgt | off label | specific master      |
| PEMBROLIZUMAB        | ESCA | tgt | off label | specific master      |
| TRAMETINIB           | ESCA | tgt | off label | specific master      |
| VEMURAFENIB          | ESCA | tgt | off label | specific master      |
| FLOXURIDINE          | ESCA | ctx | off label | specific master      |
| IFOSFAMIDE           | ESCA | ctx | off label | specific master      |
| CABOZANTINIB         | ESCA | tgt | off label | specific master      |
| BICALUTAMIDE         | ESCA | tgt | off label | transcription factor |
| LEUPROLIDE ACETATE   | ESCA | tgt | off label | transcription factor |
| EPIRUBICIN           | ESCA | ctx | off label | matrisome            |
| THIOTEPA             | GBM  | ctx | off label | specific master      |
| CAPECITABINE         | GBM  | ctx | off label | specific master      |
| CYCLOPHOSPHAMIDE     | GBM  | ctx | off label | specific master      |
| DOCETAXEL            | GBM  | ctx | off label | specific master      |
| EPIRUBICIN           | GBM  | ctx | off label | specific master      |
| EVEROLIMUS           | GBM  | tgt | off label | specific master      |
| FULVESTRANT          | GBM  | tgt | off label | specific master      |
| GEMCITABINE          | GBM  | ctx | off label | specific master      |
| LAPATINIB DITOSYLATE | GBM  | tgt | off label | specific master      |
| METHOTREXATE         | GBM  | ctx | off label | specific master      |
| PACLITAXEL           | GBM  | ctx | off label | specific master      |
| TRASTUZUMAB          | GBM  | tgt | off label | specific master      |
| BEVACIZUMAB          | GBM  | tgt | off label | specific master      |
| CETUXIMAB            | GBM  | tgt | off label | specific master      |
| IRINOTECAN           | GBM  | ctx | off label | specific master      |
| OXALIPLATIN          | GBM  | ctx | off label | specific master      |
| PANITUMUMAB          | GBM  | tgt | off label | specific master      |
| REGORAFENIB          | GBM  | tgt | off label | specific master      |
| BEVACIZUMAB          | GBM  | tgt | on label  | specific master      |
| CYCLOPHOSPHAMIDE     | GBM  | ctx | on label  | specific master      |
| DOCETAXEL            | GBM  | ctx | on label  | specific master      |
| EVEROLIMUS           | GBM  | tgt | on label  | specific master      |
| LOMUSTINE            | GBM  | ctx | on label  | specific master      |
| TEMOZOLOMIDE         | GBM  | ctx | on label  | specific master      |
| TEMSIROLIMUS         | GBM  | tgt | off label | specific master      |
| LOMUSTINE            | GBM  | ctx | off label | specific master      |
| TEMOZOLOMIDE         | GBM  | ctx | off label | specific master      |
| AFATINIB             | GBM  | tgt | off label | specific master      |



|                         |     |     |           |                      |
|-------------------------|-----|-----|-----------|----------------------|
| CRIZOTINIB              | GBM | tgt | off label | specific master      |
| ERLOTINIB HYDROCHLORIDE | GBM | tgt | off label | specific master      |
| ETOPOSIDE               | GBM | ctx | off label | specific master      |
| GEFITINIB               | GBM | tgt | off label | specific master      |
| CARBOPLATIN             | GBM | ctx | off label | specific master      |
| OLAPARIB                | GBM | tgt | off label | specific master      |
| MITOMYCIN               | GBM | ctx | off label | specific master      |
| ENZALUTAMIDE            | GBM | tgt | off label | specific master      |
| DABRAFENIB              | GBM | tgt | off label | specific master      |
| NIVOLUMAB               | GBM | tgt | off label | specific master      |
| PEMBROLIZUMAB           | GBM | tgt | off label | specific master      |
| TRAMETINIB              | GBM | tgt | off label | specific master      |
| VEMURAFENIB             | GBM | tgt | off label | specific master      |
| IFOSFAMIDE              | GBM | ctx | off label | specific master      |
| CABOZANTINIB            | GBM | tgt | off label | specific master      |
| VANDETANIB              | GBM | tgt | off label | specific master      |
| THIOTEPA                | GBM | ctx | off label | transcription factor |
| CAPECITABINE            | GBM | ctx | off label | transcription factor |
| CYCLOPHOSPHAMIDE        | GBM | ctx | off label | transcription factor |
| DOCETAXEL               | GBM | ctx | off label | transcription factor |
| EPIRUBICIN              | GBM | ctx | off label | transcription factor |
| GEMCITABINE             | GBM | ctx | off label | transcription factor |
| PACLITAXEL              | GBM | ctx | off label | transcription factor |
| BEVACIZUMAB             | GBM | tgt | off label | transcription factor |
| CETUXIMAB               | GBM | tgt | off label | transcription factor |
| IRINOTECAN              | GBM | ctx | off label | transcription factor |
| OXALIPLATIN             | GBM | ctx | off label | transcription factor |
| PANITUMUMAB             | GBM | tgt | off label | transcription factor |
| BEVACIZUMAB             | GBM | tgt | on label  | transcription factor |
| CYCLOPHOSPHAMIDE        | GBM | ctx | on label  | transcription factor |
| DOCETAXEL               | GBM | ctx | on label  | transcription factor |
| TEMOZOLOMIDE            | GBM | ctx | on label  | transcription factor |
| TEMOZOLOMIDE            | GBM | ctx | off label | transcription factor |
| CRIZOTINIB              | GBM | tgt | off label | transcription factor |
| ETOPOSIDE               | GBM | ctx | off label | transcription factor |
| CARBOPLATIN             | GBM | ctx | off label | transcription factor |
| OLAPARIB                | GBM | tgt | off label | transcription factor |
| MITOMYCIN               | GBM | ctx | off label | transcription factor |
| BICALUTAMIDE            | GBM | tgt | off label | transcription factor |
| DABRAFENIB              | GBM | tgt | off label | transcription factor |
| PEMBROLIZUMAB           | GBM | tgt | off label | transcription factor |

|                  |      |     |           |                      |
|------------------|------|-----|-----------|----------------------|
| TRAMETINIB       | GBM  | tgt | off label | transcription factor |
| VEMURAFENIB      | GBM  | tgt | off label | transcription factor |
| IFOSFAMIDE       | GBM  | ctx | off label | transcription factor |
| EPIRUBICIN       | GBM  | ctx | off label | matrisome            |
| AXITINIB         | GBM  | tgt | off label | matrisome            |
| DACTINOMYCIN     | GBM  | ctx | off label | matrisome            |
| THIOTEPA         | HNSC | ctx | off label | specific master      |
| CAPECITABINE     | HNSC | ctx | off label | specific master      |
| CYCLOPHOSPHAMIDE | HNSC | ctx | off label | specific master      |
| DOCETAXEL        | HNSC | ctx | off label | specific master      |
| EPIRUBICIN       | HNSC | ctx | off label | specific master      |
| EVEROLIMUS       | HNSC | tgt | off label | specific master      |
| FLUOROURACIL     | HNSC | ctx | off label | specific master      |
| FULVESTRANT      | HNSC | tgt | off label | specific master      |
| GEMCITABINE      | HNSC | ctx | off label | specific master      |
| LETROZOLE        | HNSC | tgt | off label | specific master      |
| METHOTREXATE     | HNSC | ctx | off label | specific master      |
| PACLITAXEL       | HNSC | ctx | off label | specific master      |
| PERTUZUMAB       | HNSC | tgt | off label | specific master      |
| TRASTUZUMAB      | HNSC | tgt | off label | specific master      |
| BEVACIZUMAB      | HNSC | tgt | off label | specific master      |
| CETUXIMAB        | HNSC | tgt | off label | specific master      |
| IRINOTECAN       | HNSC | ctx | off label | specific master      |
| OXALIPLATIN      | HNSC | ctx | off label | specific master      |
| PANITUMUMAB      | HNSC | tgt | off label | specific master      |
| REGORAFENIB      | HNSC | tgt | off label | specific master      |
| TEMOZOLOMIDE     | HNSC | ctx | off label | specific master      |
| CETUXIMAB        | HNSC | tgt | on label  | specific master      |
| DOCETAXEL        | HNSC | ctx | on label  | specific master      |
| METHOTREXATE     | HNSC | ctx | on label  | specific master      |
| TEMSIROLIMUS     | HNSC | tgt | off label | specific master      |
| CRIZOTINIB       | HNSC | tgt | off label | specific master      |
| ETOPOSIDE        | HNSC | ctx | off label | specific master      |
| CARBOPLATIN      | HNSC | ctx | off label | specific master      |
| OLAPARIB         | HNSC | tgt | off label | specific master      |
| MITOMYCIN        | HNSC | ctx | off label | specific master      |
| FLUTAMIDE        | HNSC | tgt | off label | specific master      |
| DABRAFENIB       | HNSC | tgt | off label | specific master      |
| PEMBROLIZUMAB    | HNSC | tgt | off label | specific master      |
| TRAMETINIB       | HNSC | tgt | off label | specific master      |
| VEMURAFENIB      | HNSC | tgt | off label | specific master      |

|                    |      |     |           |                      |
|--------------------|------|-----|-----------|----------------------|
| FLOXURIDINE        | HNSC | ctx | off label | specific master      |
| IFOSFAMIDE         | HNSC | ctx | off label | specific master      |
| CABOZANTINIB       | HNSC | tgt | off label | specific master      |
| PACLITAXEL         | HNSC | ctx | off label | transcription factor |
| CETUXIMAB          | HNSC | tgt | off label | transcription factor |
| CETUXIMAB          | HNSC | tgt | on label  | transcription factor |
| BICALUTAMIDE       | HNSC | tgt | off label | transcription factor |
| LEUPROLIDE ACETATE | HNSC | tgt | off label | transcription factor |
| EPIRUBICIN         | HNSC | ctx | off label | matrisome            |
| THIOTEPA           | KICH | ctx | off label | specific master      |
| CAPECITABINE       | KICH | ctx | off label | specific master      |
| CYCLOPHOSPHAMIDE   | KICH | ctx | off label | specific master      |
| DOCETAXEL          | KICH | ctx | off label | specific master      |
| EPIRUBICIN         | KICH | ctx | off label | specific master      |
| GEMCITABINE        | KICH | ctx | off label | specific master      |
| PACLITAXEL         | KICH | ctx | off label | specific master      |
| BEVACIZUMAB        | KICH | tgt | off label | specific master      |
| CETUXIMAB          | KICH | tgt | off label | specific master      |
| IRINOTECAN         | KICH | ctx | off label | specific master      |
| OXALIPLATIN        | KICH | ctx | off label | specific master      |
| PANITUMUMAB        | KICH | tgt | off label | specific master      |
| TEMOZOLOMIDE       | KICH | ctx | off label | specific master      |
| BEVACIZUMAB        | KICH | tgt | on label  | specific master      |
| CRIZOTINIB         | KICH | tgt | off label | specific master      |
| ETOPOSIDE          | KICH | ctx | off label | specific master      |
| CARBOPLATIN        | KICH | ctx | off label | specific master      |
| OLAPARIB           | KICH | tgt | off label | specific master      |
| MITOMYCIN          | KICH | ctx | off label | specific master      |
| DABRAFENIB         | KICH | tgt | off label | specific master      |
| PEMBROLIZUMAB      | KICH | tgt | off label | specific master      |
| TRAMETINIB         | KICH | tgt | off label | specific master      |
| VEMURAFENIB        | KICH | tgt | off label | specific master      |
| IFOSFAMIDE         | KICH | ctx | off label | specific master      |
| METHOTREXATE       | KICH | ctx | off label | transcription factor |
| LEUPROLIDE ACETATE | KICH | tgt | off label | transcription factor |
| DOCETAXEL          | KICH | ctx | off label | matrisome            |
| EVEROLIMUS         | KIRC | tgt | off label | specific master      |
| BEVACIZUMAB        | KIRC | tgt | off label | specific master      |
| REGORAFENIB        | KIRC | tgt | off label | specific master      |
| AXITINIB           | KIRC | tgt | off label | specific master      |
| TEMSIROLIMUS       | KIRC | tgt | off label | specific master      |

|                  |      |     |           |                      |
|------------------|------|-----|-----------|----------------------|
| AXITINIB         | KIRC | tgt | on label  | specific master      |
| BEVACIZUMAB      | KIRC | tgt | on label  | specific master      |
| EVEROLIMUS       | KIRC | tgt | on label  | specific master      |
| TEMSIROLIMUS     | KIRC | tgt | on label  | specific master      |
| OLAPARIB         | KIRC | tgt | off label | specific master      |
| TRAMETINIB       | KIRC | tgt | off label | specific master      |
| THIOTEPA         | KIRC | ctx | off label | transcription factor |
| CAPECITABINE     | KIRC | ctx | off label | transcription factor |
| CYCLOPHOSPHAMIDE | KIRC | ctx | off label | transcription factor |
| DOCETAXEL        | KIRC | ctx | off label | transcription factor |
| EPIRUBICIN       | KIRC | ctx | off label | transcription factor |
| GEMCITABINE      | KIRC | ctx | off label | transcription factor |
| PACLITAXEL       | KIRC | ctx | off label | transcription factor |
| BEVACIZUMAB      | KIRC | tgt | off label | transcription factor |
| CETUXIMAB        | KIRC | tgt | off label | transcription factor |
| IRINOTECAN       | KIRC | ctx | off label | transcription factor |
| OXALIPLATIN      | KIRC | ctx | off label | transcription factor |
| PANITUMUMAB      | KIRC | tgt | off label | transcription factor |
| TEMOZOLOMIDE     | KIRC | ctx | off label | transcription factor |
| BEVACIZUMAB      | KIRC | tgt | on label  | transcription factor |
| CRIZOTINIB       | KIRC | tgt | off label | transcription factor |
| ETOPOSIDE        | KIRC | ctx | off label | transcription factor |
| CARBOPLATIN      | KIRC | ctx | off label | transcription factor |
| OLAPARIB         | KIRC | tgt | off label | transcription factor |
| MITOMYCIN        | KIRC | ctx | off label | transcription factor |
| DABRAFENIB       | KIRC | tgt | off label | transcription factor |
| PEMBROLIZUMAB    | KIRC | tgt | off label | transcription factor |
| TRAMETINIB       | KIRC | tgt | off label | transcription factor |
| VEMURAFENIB      | KIRC | tgt | off label | transcription factor |
| IFOSFAMIDE       | KIRC | ctx | off label | transcription factor |
| AXITINIB         | KIRC | tgt | off label | matrisome            |
| DACTINOMYCIN     | KIRC | ctx | off label | matrisome            |
| AXITINIB         | KIRC | tgt | on label  | matrisome            |
| DACTINOMYCIN     | KIRC | ctx | on label  | matrisome            |
| THIOTEPA         | LAML | ctx | off label | specific master      |
| CAPECITABINE     | LAML | ctx | off label | specific master      |
| CYCLOPHOSPHAMIDE | LAML | ctx | off label | specific master      |
| DOCETAXEL        | LAML | ctx | off label | specific master      |
| EPIRUBICIN       | LAML | ctx | off label | specific master      |
| GEMCITABINE      | LAML | ctx | off label | specific master      |
| PACLITAXEL       | LAML | ctx | off label | specific master      |

|                      |      |     |           |                      |
|----------------------|------|-----|-----------|----------------------|
| BEVACIZUMAB          | LAML | tgt | off label | specific master      |
| CETUXIMAB            | LAML | tgt | off label | specific master      |
| IRINOTECAN           | LAML | ctx | off label | specific master      |
| OXALIPLATIN          | LAML | ctx | off label | specific master      |
| PANITUMUMAB          | LAML | tgt | off label | specific master      |
| TEMOZOLOMIDE         | LAML | ctx | off label | specific master      |
| CERITINIB            | LAML | tgt | off label | specific master      |
| CRIZOTINIB           | LAML | tgt | off label | specific master      |
| ETOPOSIDE            | LAML | ctx | off label | specific master      |
| CARBOPLATIN          | LAML | ctx | off label | specific master      |
| OLAPARIB             | LAML | tgt | off label | specific master      |
| MITOMYCIN            | LAML | ctx | off label | specific master      |
| DABRAFENIB           | LAML | tgt | off label | specific master      |
| PEMBROLIZUMAB        | LAML | tgt | off label | specific master      |
| TRAMETINIB           | LAML | tgt | off label | specific master      |
| VEMURAFENIB          | LAML | tgt | off label | specific master      |
| IFOSFAMIDE           | LAML | ctx | off label | specific master      |
| CETUXIMAB            | LAML | tgt | off label | transcription factor |
| BICALUTAMIDE         | LAML | tgt | off label | transcription factor |
| LEUPROLIDE ACETATE   | LAML | tgt | off label | transcription factor |
| THIOTEPA             | LGG  | ctx | off label | specific master      |
| CAPECITABINE         | LGG  | ctx | off label | specific master      |
| CYCLOPHOSPHAMIDE     | LGG  | ctx | off label | specific master      |
| DOCETAXEL            | LGG  | ctx | off label | specific master      |
| EPIRUBICIN           | LGG  | ctx | off label | specific master      |
| EVEROLIMUS           | LGG  | tgt | off label | specific master      |
| GEMCITABINE          | LGG  | ctx | off label | specific master      |
| LAPATINIB DITOSYLATE | LGG  | tgt | off label | specific master      |
| METHOTREXATE         | LGG  | ctx | off label | specific master      |
| PACLITAXEL           | LGG  | ctx | off label | specific master      |
| TRASTUZUMAB          | LGG  | tgt | off label | specific master      |
| BEVACIZUMAB          | LGG  | tgt | off label | specific master      |
| CETUXIMAB            | LGG  | tgt | off label | specific master      |
| IRINOTECAN           | LGG  | ctx | off label | specific master      |
| OXALIPLATIN          | LGG  | ctx | off label | specific master      |
| PANITUMUMAB          | LGG  | tgt | off label | specific master      |
| REGORAFENIB          | LGG  | tgt | off label | specific master      |
| TEMOZOLOMIDE         | LGG  | ctx | off label | specific master      |
| TEMSIROLIMUS         | LGG  | tgt | off label | specific master      |
| BEVACIZUMAB          | LGG  | tgt | on label  | specific master      |
| CYCLOPHOSPHAMIDE     | LGG  | ctx | on label  | specific master      |

|                         |      |     |           |                      |
|-------------------------|------|-----|-----------|----------------------|
| DOCETAXEL               | LGG  | ctx | on label  | specific master      |
| EVEROLIMUS              | LGG  | tgt | on label  | specific master      |
| TEMOZOLOMIDE            | LGG  | ctx | on label  | specific master      |
| AFATINIB                | LGG  | tgt | off label | specific master      |
| CRIZOTINIB              | LGG  | tgt | off label | specific master      |
| ERLOTINIB HYDROCHLORIDE | LGG  | tgt | off label | specific master      |
| ETOPOSIDE               | LGG  | ctx | off label | specific master      |
| GEFITINIB               | LGG  | tgt | off label | specific master      |
| CARBOPLATIN             | LGG  | ctx | off label | specific master      |
| OLAPARIB                | LGG  | tgt | off label | specific master      |
| MITOMYCIN               | LGG  | ctx | off label | specific master      |
| DABRAFENIB              | LGG  | tgt | off label | specific master      |
| NIVOLUMAB               | LGG  | tgt | off label | specific master      |
| PEMBROLIZUMAB           | LGG  | tgt | off label | specific master      |
| TRAMETINIB              | LGG  | tgt | off label | specific master      |
| VEMURAFENIB             | LGG  | tgt | off label | specific master      |
| IFOSFAMIDE              | LGG  | ctx | off label | specific master      |
| CABOZANTINIB            | LGG  | tgt | off label | specific master      |
| VANDETANIB              | LGG  | tgt | off label | specific master      |
| METHOTREXATE            | LGG  | ctx | off label | transcription factor |
| FULVESTRANT             | LGG  | tgt | off label | matrisome            |
| AXITINIB                | LGG  | tgt | off label | matrisome            |
| DACTINOMYCIN            | LGG  | ctx | off label | matrisome            |
| THIOTEPA                | LUAD | ctx | off label | specific master      |
| CAPECITABINE            | LUAD | ctx | off label | specific master      |
| CYCLOPHOSPHAMIDE        | LUAD | ctx | off label | specific master      |
| DOCETAXEL               | LUAD | ctx | off label | specific master      |
| EPIRUBICIN              | LUAD | ctx | off label | specific master      |
| EVEROLIMUS              | LUAD | tgt | off label | specific master      |
| GEMCITABINE             | LUAD | ctx | off label | specific master      |
| LAPATINIB DITOSYLATE    | LUAD | tgt | off label | specific master      |
| PACLITAXEL              | LUAD | ctx | off label | specific master      |
| TRASTUZUMAB             | LUAD | tgt | off label | specific master      |
| BEVACIZUMAB             | LUAD | tgt | off label | specific master      |
| CETUXIMAB               | LUAD | tgt | off label | specific master      |
| IRINOTECAN              | LUAD | ctx | off label | specific master      |
| OXALIPLATIN             | LUAD | ctx | off label | specific master      |
| PANITUMUMAB             | LUAD | tgt | off label | specific master      |
| REGORAFENIB             | LUAD | tgt | off label | specific master      |
| TEMOZOLOMIDE            | LUAD | ctx | off label | specific master      |
| TEMSIROLIMUS            | LUAD | tgt | off label | specific master      |

|                         |      |     |           |                      |
|-------------------------|------|-----|-----------|----------------------|
| AFATINIB                | LUAD | tgt | on label  | specific master      |
| BEVACIZUMAB             | LUAD | tgt | on label  | specific master      |
| CRIZOTINIB              | LUAD | tgt | on label  | specific master      |
| DOCETAXEL               | LUAD | ctx | on label  | specific master      |
| ERLOTINIB HYDROCHLORIDE | LUAD | tgt | on label  | specific master      |
| ETOPOSIDE               | LUAD | ctx | on label  | specific master      |
| GEFITINIB               | LUAD | tgt | on label  | specific master      |
| GEMCITABINE             | LUAD | ctx | on label  | specific master      |
| PACLITAXEL              | LUAD | ctx | on label  | specific master      |
| AFATINIB                | LUAD | tgt | off label | specific master      |
| CRIZOTINIB              | LUAD | tgt | off label | specific master      |
| ERLOTINIB HYDROCHLORIDE | LUAD | tgt | off label | specific master      |
| ETOPOSIDE               | LUAD | ctx | off label | specific master      |
| GEFITINIB               | LUAD | tgt | off label | specific master      |
| CARBOPLATIN             | LUAD | ctx | off label | specific master      |
| OLAPARIB                | LUAD | tgt | off label | specific master      |
| MITOMYCIN               | LUAD | ctx | off label | specific master      |
| DABRAFENIB              | LUAD | tgt | off label | specific master      |
| NIVOLUMAB               | LUAD | tgt | off label | specific master      |
| PEMBROLIZUMAB           | LUAD | tgt | off label | specific master      |
| TRAMETINIB              | LUAD | tgt | off label | specific master      |
| VEMURAFENIB             | LUAD | tgt | off label | specific master      |
| IFOSFAMIDE              | LUAD | ctx | off label | specific master      |
| CABOZANTINIB            | LUAD | tgt | off label | specific master      |
| VANDETANIB              | LUAD | tgt | off label | specific master      |
| BICALUTAMIDE            | LUAD | tgt | off label | transcription factor |
| LEUPROLIDE ACETATE      | LUAD | tgt | off label | transcription factor |
| THIOTEPA                | LUSC | ctx | off label | specific master      |
| CAPECITABINE            | LUSC | ctx | off label | specific master      |
| CYCLOPHOSPHAMIDE        | LUSC | ctx | off label | specific master      |
| DOCETAXEL               | LUSC | ctx | off label | specific master      |
| EPIRUBICIN              | LUSC | ctx | off label | specific master      |
| EVEROLIMUS              | LUSC | tgt | off label | specific master      |
| GEMCITABINE             | LUSC | ctx | off label | specific master      |
| METHOTREXATE            | LUSC | ctx | off label | specific master      |
| PACLITAXEL              | LUSC | ctx | off label | specific master      |
| TRASTUZUMAB             | LUSC | tgt | off label | specific master      |
| BEVACIZUMAB             | LUSC | tgt | off label | specific master      |
| CETUXIMAB               | LUSC | tgt | off label | specific master      |
| IRINOTECAN              | LUSC | ctx | off label | specific master      |
| OXALIPLATIN             | LUSC | ctx | off label | specific master      |

|                  |      |     |           |                      |
|------------------|------|-----|-----------|----------------------|
| PANITUMUMAB      | LUSC | tgt | off label | specific master      |
| REGORAFENIB      | LUSC | tgt | off label | specific master      |
| TEMOZOLOMIDE     | LUSC | ctx | off label | specific master      |
| TEMSIROLIMUS     | LUSC | tgt | off label | specific master      |
| CRIZOTINIB       | LUSC | tgt | off label | specific master      |
| ETOPOSIDE        | LUSC | ctx | off label | specific master      |
| BEVACIZUMAB      | LUSC | tgt | on label  | specific master      |
| CRIZOTINIB       | LUSC | tgt | on label  | specific master      |
| DOCETAXEL        | LUSC | ctx | on label  | specific master      |
| ETOPOSIDE        | LUSC | ctx | on label  | specific master      |
| GEMCITABINE      | LUSC | ctx | on label  | specific master      |
| METHOTREXATE     | LUSC | ctx | on label  | specific master      |
| PACLITAXEL       | LUSC | ctx | on label  | specific master      |
| CARBOPLATIN      | LUSC | ctx | off label | specific master      |
| OLAPARIB         | LUSC | tgt | off label | specific master      |
| MITOMYCIN        | LUSC | ctx | off label | specific master      |
| FLUTAMIDE        | LUSC | tgt | off label | specific master      |
| DABRAFENIB       | LUSC | tgt | off label | specific master      |
| PEMBROLIZUMAB    | LUSC | tgt | off label | specific master      |
| TRAMETINIB       | LUSC | tgt | off label | specific master      |
| VEMURAFENIB      | LUSC | tgt | off label | specific master      |
| IFOSFAMIDE       | LUSC | ctx | off label | specific master      |
| ANASTROZOLE      | LUSC | tgt | off label | transcription factor |
| LETROZOLE        | LUSC | tgt | off label | transcription factor |
| TOREMIFENE       | LUSC | tgt | off label | transcription factor |
| TRASTUZUMAB      | LUSC | tgt | off label | transcription factor |
| FLUTAMIDE        | LUSC | tgt | off label | transcription factor |
| OXALIPLATIN      | LUSC | ctx | off label | matrisome            |
| THIOTEPA         | MESO | ctx | off label | specific master      |
| CAPECITABINE     | MESO | ctx | off label | specific master      |
| CYCLOPHOSPHAMIDE | MESO | ctx | off label | specific master      |
| DOCETAXEL        | MESO | ctx | off label | specific master      |
| EPIRUBICIN       | MESO | ctx | off label | specific master      |
| EVEROLIMUS       | MESO | tgt | off label | specific master      |
| GEMCITABINE      | MESO | ctx | off label | specific master      |
| PACLITAXEL       | MESO | ctx | off label | specific master      |
| BEVACIZUMAB      | MESO | tgt | off label | specific master      |
| CETUXIMAB        | MESO | tgt | off label | specific master      |
| IRINOTECAN       | MESO | ctx | off label | specific master      |
| OXALIPLATIN      | MESO | ctx | off label | specific master      |
| PANITUMUMAB      | MESO | tgt | off label | specific master      |



|                  |      |     |           |                 |
|------------------|------|-----|-----------|-----------------|
| TEMOZOLOMIDE     | MESO | ctx | off label | specific master |
| TEMSIROLIMUS     | MESO | tgt | off label | specific master |
| CRIZOTINIB       | MESO | tgt | off label | specific master |
| ETOPOSIDE        | MESO | ctx | off label | specific master |
| CARBOPLATIN      | MESO | ctx | off label | specific master |
| OLAPARIB         | MESO | tgt | off label | specific master |
| MITOMYCIN        | MESO | ctx | off label | specific master |
| DABRAFENIB       | MESO | tgt | off label | specific master |
| PEMBROLIZUMAB    | MESO | tgt | off label | specific master |
| TRAMETINIB       | MESO | tgt | off label | specific master |
| VEMURAFENIB      | MESO | tgt | off label | specific master |
| IFOSFAMIDE       | MESO | ctx | off label | specific master |
| THIOTEPA         | PAAD | ctx | off label | specific master |
| CAPECITABINE     | PAAD | ctx | off label | specific master |
| CYCLOPHOSPHAMIDE | PAAD | ctx | off label | specific master |
| DOCETAXEL        | PAAD | ctx | off label | specific master |
| EPIRUBICIN       | PAAD | ctx | off label | specific master |
| FLUOROURACIL     | PAAD | ctx | off label | specific master |
| GEMCITABINE      | PAAD | ctx | off label | specific master |
| PACLITAXEL       | PAAD | ctx | off label | specific master |
| TRASTUZUMAB      | PAAD | tgt | off label | specific master |
| BEVACIZUMAB      | PAAD | tgt | off label | specific master |
| CETUXIMAB        | PAAD | tgt | off label | specific master |
| IRINOTECAN       | PAAD | ctx | off label | specific master |
| OXALIPLATIN      | PAAD | ctx | off label | specific master |
| PANITUMUMAB      | PAAD | tgt | off label | specific master |
| TEMOZOLOMIDE     | PAAD | ctx | off label | specific master |
| CRIZOTINIB       | PAAD | tgt | off label | specific master |
| ETOPOSIDE        | PAAD | ctx | off label | specific master |
| CARBOPLATIN      | PAAD | ctx | off label | specific master |
| OLAPARIB         | PAAD | tgt | off label | specific master |
| FLUOROURACIL     | PAAD | ctx | on label  | specific master |
| GEMCITABINE      | PAAD | ctx | on label  | specific master |
| MITOMYCIN        | PAAD | ctx | on label  | specific master |
| PACLITAXEL       | PAAD | ctx | on label  | specific master |
| DABRAFENIB       | PAAD | tgt | off label | specific master |
| PEMBROLIZUMAB    | PAAD | tgt | off label | specific master |
| TRAMETINIB       | PAAD | tgt | off label | specific master |
| VEMURAFENIB      | PAAD | tgt | off label | specific master |
| MITOMYCIN        | PAAD | ctx | off label | specific master |
| IFOSFAMIDE       | PAAD | ctx | off label | specific master |

|                    |      |     |           |                      |
|--------------------|------|-----|-----------|----------------------|
| LEUPROLIDE ACETATE | PAAD | tgt | off label | transcription factor |
| DOCETAXEL          | PCPG | ctx | off label | specific master      |
| EVEROLIMUS         | PCPG | tgt | off label | specific master      |
| GEMCITABINE        | PCPG | ctx | off label | specific master      |
| BEVACIZUMAB        | PCPG | tgt | off label | specific master      |
| CETUXIMAB          | PCPG | tgt | off label | specific master      |
| PANITUMUMAB        | PCPG | tgt | off label | specific master      |
| HYDROXYUREA        | PCPG | tgt | off label | specific master      |
| TRAMETINIB         | PCPG | tgt | off label | specific master      |
| CABOZANTINIB       | PCPG | tgt | off label | specific master      |
| THIOTEPA           | PCPG | ctx | off label | transcription factor |
| CAPECITABINE       | PCPG | ctx | off label | transcription factor |
| CYCLOPHOSPHAMIDE   | PCPG | ctx | off label | transcription factor |
| DOCETAXEL          | PCPG | ctx | off label | transcription factor |
| EPIRUBICIN         | PCPG | ctx | off label | transcription factor |
| GEMCITABINE        | PCPG | ctx | off label | transcription factor |
| PACLITAXEL         | PCPG | ctx | off label | transcription factor |
| BEVACIZUMAB        | PCPG | tgt | off label | transcription factor |
| CETUXIMAB          | PCPG | tgt | off label | transcription factor |
| IRINOTECAN         | PCPG | ctx | off label | transcription factor |
| OXALIPLATIN        | PCPG | ctx | off label | transcription factor |
| PANITUMUMAB        | PCPG | tgt | off label | transcription factor |
| TEMOZOLOMIDE       | PCPG | ctx | off label | transcription factor |
| CRIZOTINIB         | PCPG | tgt | off label | transcription factor |
| ETOPOSIDE          | PCPG | ctx | off label | transcription factor |
| CARBOPLATIN        | PCPG | ctx | off label | transcription factor |
| OLAPARIB           | PCPG | tgt | off label | transcription factor |
| MITOMYCIN          | PCPG | ctx | off label | transcription factor |
| DABRAFENIB         | PCPG | tgt | off label | transcription factor |
| PEMBROLIZUMAB      | PCPG | tgt | off label | transcription factor |
| TRAMETINIB         | PCPG | tgt | off label | transcription factor |
| VEMURAFENIB        | PCPG | tgt | off label | transcription factor |
| IFOSFAMIDE         | PCPG | ctx | off label | transcription factor |
| DOCETAXEL          | PCPG | ctx | off label | matrisome            |
| THIOTEPA           | PRAD | ctx | off label | specific master      |
| CAPECITABINE       | PRAD | ctx | off label | specific master      |
| CYCLOPHOSPHAMIDE   | PRAD | ctx | off label | specific master      |
| DOCETAXEL          | PRAD | ctx | off label | specific master      |
| EPIRUBICIN         | PRAD | ctx | off label | specific master      |
| GEMCITABINE        | PRAD | ctx | off label | specific master      |
| PACLITAXEL         | PRAD | ctx | off label | specific master      |

|                  |      |     |           |                      |
|------------------|------|-----|-----------|----------------------|
| BEVACIZUMAB      | PRAD | tgt | off label | specific master      |
| CETUXIMAB        | PRAD | tgt | off label | specific master      |
| IRINOTECAN       | PRAD | ctx | off label | specific master      |
| OXALIPLATIN      | PRAD | ctx | off label | specific master      |
| PANITUMUMAB      | PRAD | tgt | off label | specific master      |
| TEMOZOLOMIDE     | PRAD | ctx | off label | specific master      |
| CRIZOTINIB       | PRAD | tgt | off label | specific master      |
| ETOPOSIDE        | PRAD | ctx | off label | specific master      |
| CARBOPLATIN      | PRAD | ctx | off label | specific master      |
| OLAPARIB         | PRAD | tgt | off label | specific master      |
| MITOMYCIN        | PRAD | ctx | off label | specific master      |
| DOCETAXEL        | PRAD | ctx | on label  | specific master      |
| DABRAFENIB       | PRAD | tgt | off label | specific master      |
| PEMBROLIZUMAB    | PRAD | tgt | off label | specific master      |
| TRAMETINIB       | PRAD | tgt | off label | specific master      |
| VEMURAFENIB      | PRAD | tgt | off label | specific master      |
| IFOSFAMIDE       | PRAD | ctx | off label | specific master      |
| THIOTEPA         | PRAD | ctx | off label | transcription factor |
| CAPECITABINE     | PRAD | ctx | off label | transcription factor |
| CYCLOPHOSPHAMIDE | PRAD | ctx | off label | transcription factor |
| DOCETAXEL        | PRAD | ctx | off label | transcription factor |
| EPIRUBICIN       | PRAD | ctx | off label | transcription factor |
| GEMCITABINE      | PRAD | ctx | off label | transcription factor |
| PACLITAXEL       | PRAD | ctx | off label | transcription factor |
| BEVACIZUMAB      | PRAD | tgt | off label | transcription factor |
| CETUXIMAB        | PRAD | tgt | off label | transcription factor |
| IRINOTECAN       | PRAD | ctx | off label | transcription factor |
| OXALIPLATIN      | PRAD | ctx | off label | transcription factor |
| PANITUMUMAB      | PRAD | tgt | off label | transcription factor |
| TEMOZOLOMIDE     | PRAD | ctx | off label | transcription factor |
| CRIZOTINIB       | PRAD | tgt | off label | transcription factor |
| ETOPOSIDE        | PRAD | ctx | off label | transcription factor |
| CARBOPLATIN      | PRAD | ctx | off label | transcription factor |
| OLAPARIB         | PRAD | tgt | off label | transcription factor |
| MITOMYCIN        | PRAD | ctx | off label | transcription factor |
| DOCETAXEL        | PRAD | ctx | on label  | transcription factor |
| DABRAFENIB       | PRAD | tgt | off label | transcription factor |
| PEMBROLIZUMAB    | PRAD | tgt | off label | transcription factor |
| TRAMETINIB       | PRAD | tgt | off label | transcription factor |
| VEMURAFENIB      | PRAD | tgt | off label | transcription factor |
| IFOSFAMIDE       | PRAD | ctx | off label | transcription factor |

|                  |      |     |           |                      |
|------------------|------|-----|-----------|----------------------|
| FLUOROURACIL     | PRAD | ctx | off label | matrisome            |
| CETUXIMAB        | PRAD | tgt | off label | matrisome            |
| THIOTEPA         | SARC | ctx | off label | specific master      |
| CAPECITABINE     | SARC | ctx | off label | specific master      |
| CYCLOPHOSPHAMIDE | SARC | ctx | off label | specific master      |
| DOCETAXEL        | SARC | ctx | off label | specific master      |
| EPIRUBICIN       | SARC | ctx | off label | specific master      |
| EVEROLIMUS       | SARC | tgt | off label | specific master      |
| GEMCITABINE      | SARC | ctx | off label | specific master      |
| METHOTREXATE     | SARC | ctx | off label | specific master      |
| PACLITAXEL       | SARC | ctx | off label | specific master      |
| BEVACIZUMAB      | SARC | tgt | off label | specific master      |
| CETUXIMAB        | SARC | tgt | off label | specific master      |
| IRINOTECAN       | SARC | ctx | off label | specific master      |
| OXALIPLATIN      | SARC | ctx | off label | specific master      |
| PANITUMUMAB      | SARC | tgt | off label | specific master      |
| TEMOZOLOMIDE     | SARC | ctx | off label | specific master      |
| CRIZOTINIB       | SARC | tgt | off label | specific master      |
| ETOPOSIDE        | SARC | ctx | off label | specific master      |
| CARBOPLATIN      | SARC | ctx | off label | specific master      |
| OLAPARIB         | SARC | tgt | off label | specific master      |
| MITOMYCIN        | SARC | ctx | off label | specific master      |
| METHOTREXATE     | SARC | ctx | on label  | specific master      |
| PACLITAXEL       | SARC | ctx | on label  | specific master      |
| DABRAFENIB       | SARC | tgt | off label | specific master      |
| PEMBROLIZUMAB    | SARC | tgt | off label | specific master      |
| TRAMETINIB       | SARC | tgt | off label | specific master      |
| VEMURAFENIB      | SARC | tgt | off label | specific master      |
| IFOSFAMIDE       | SARC | ctx | off label | specific master      |
| BICALUTAMIDE     | SARC | tgt | off label | transcription factor |
| THIOTEPA         | STAD | ctx | off label | specific master      |
| CAPECITABINE     | STAD | ctx | off label | specific master      |
| CYCLOPHOSPHAMIDE | STAD | ctx | off label | specific master      |
| DOCETAXEL        | STAD | ctx | off label | specific master      |
| EPIRUBICIN       | STAD | ctx | off label | specific master      |
| EVEROLIMUS       | STAD | tgt | off label | specific master      |
| FLUOROURACIL     | STAD | ctx | off label | specific master      |
| FULVESTRANT      | STAD | tgt | off label | specific master      |
| GEMCITABINE      | STAD | ctx | off label | specific master      |
| LETROZOLE        | STAD | tgt | off label | specific master      |
| PACLITAXEL       | STAD | ctx | off label | specific master      |

|                    |      |     |           |                      |
|--------------------|------|-----|-----------|----------------------|
| PERTUZUMAB         | STAD | tgt | off label | specific master      |
| TRASTUZUMAB        | STAD | tgt | off label | specific master      |
| BEVACIZUMAB        | STAD | tgt | off label | specific master      |
| CETUXIMAB          | STAD | tgt | off label | specific master      |
| IRINOTECAN         | STAD | ctx | off label | specific master      |
| LEUCOVORIN         | STAD | ctx | off label | specific master      |
| OXALIPLATIN        | STAD | ctx | off label | specific master      |
| PANITUMUMAB        | STAD | tgt | off label | specific master      |
| REGORAFENIB        | STAD | tgt | off label | specific master      |
| TEMOZOLOMIDE       | STAD | ctx | off label | specific master      |
| TEMSIROLIMUS       | STAD | tgt | off label | specific master      |
| AFATINIB           | STAD | tgt | off label | specific master      |
| CRIZOTINIB         | STAD | tgt | off label | specific master      |
| ETOPOSIDE          | STAD | ctx | off label | specific master      |
| GEFITINIB          | STAD | tgt | off label | specific master      |
| CARBOPLATIN        | STAD | ctx | off label | specific master      |
| OLAPARIB           | STAD | tgt | off label | specific master      |
| MITOMYCIN          | STAD | ctx | off label | specific master      |
| DABRAFENIB         | STAD | tgt | off label | specific master      |
| PEMBROLIZUMAB      | STAD | tgt | off label | specific master      |
| TRAMETINIB         | STAD | tgt | off label | specific master      |
| VEMURAFENIB        | STAD | tgt | off label | specific master      |
| DOCETAXEL          | STAD | ctx | on label  | specific master      |
| FLOXURIDINE        | STAD | ctx | on label  | specific master      |
| FLUOROURACIL       | STAD | ctx | on label  | specific master      |
| MITOMYCIN          | STAD | ctx | on label  | specific master      |
| REGORAFENIB        | STAD | tgt | on label  | specific master      |
| TRASTUZUMAB        | STAD | tgt | on label  | specific master      |
| IFOSFAMIDE         | STAD | ctx | off label | specific master      |
| CABOZANTINIB       | STAD | tgt | off label | specific master      |
| VANDETANIB         | STAD | tgt | off label | specific master      |
| CETUXIMAB          | STAD | tgt | off label | transcription factor |
| BICALUTAMIDE       | STAD | tgt | off label | transcription factor |
| LEUPROLIDE ACETATE | STAD | tgt | off label | transcription factor |
| THIOTEPA           | UCEC | ctx | off label | specific master      |
| CAPECITABINE       | UCEC | ctx | off label | specific master      |
| CYCLOPHOSPHAMIDE   | UCEC | ctx | off label | specific master      |
| DOCETAXEL          | UCEC | ctx | off label | specific master      |
| EPIRUBICIN         | UCEC | ctx | off label | specific master      |
| EVEROLIMUS         | UCEC | tgt | off label | specific master      |
| GEMCITABINE        | UCEC | ctx | off label | specific master      |

|                  |      |     |           |                      |
|------------------|------|-----|-----------|----------------------|
| LETROZOLE        | UCEC | tgt | off label | specific master      |
| METHOTREXATE     | UCEC | ctx | off label | specific master      |
| PACLITAXEL       | UCEC | ctx | off label | specific master      |
| TRASTUZUMAB      | UCEC | tgt | off label | specific master      |
| BEVACIZUMAB      | UCEC | tgt | off label | specific master      |
| CETUXIMAB        | UCEC | tgt | off label | specific master      |
| IRINOTECAN       | UCEC | ctx | off label | specific master      |
| OXALIPLATIN      | UCEC | ctx | off label | specific master      |
| PANITUMUMAB      | UCEC | tgt | off label | specific master      |
| REGORAFENIB      | UCEC | tgt | off label | specific master      |
| TEMOZOLOMIDE     | UCEC | ctx | off label | specific master      |
| TEMSIROLIMUS     | UCEC | tgt | off label | specific master      |
| CRIZOTINIB       | UCEC | tgt | off label | specific master      |
| ETOPOSIDE        | UCEC | ctx | off label | specific master      |
| CARBOPLATIN      | UCEC | ctx | off label | specific master      |
| OLAPARIB         | UCEC | tgt | off label | specific master      |
| MITOMYCIN        | UCEC | ctx | off label | specific master      |
| FLUTAMIDE        | UCEC | tgt | off label | specific master      |
| DABRAFENIB       | UCEC | tgt | off label | specific master      |
| PEMBROLIZUMAB    | UCEC | tgt | off label | specific master      |
| TRAMETINIB       | UCEC | tgt | off label | specific master      |
| VEMURAFENIB      | UCEC | tgt | off label | specific master      |
| IFOSFAMIDE       | UCEC | ctx | off label | specific master      |
| PACLITAXEL       | UCEC | ctx | off label | transcription factor |
| THIOTEPA         | UCS  | ctx | off label | specific master      |
| CAPECITABINE     | UCS  | ctx | off label | specific master      |
| CYCLOPHOSPHAMIDE | UCS  | ctx | off label | specific master      |
| DOCETAXEL        | UCS  | ctx | off label | specific master      |
| EPIRUBICIN       | UCS  | ctx | off label | specific master      |
| GEMCITABINE      | UCS  | ctx | off label | specific master      |
| PACLITAXEL       | UCS  | ctx | off label | specific master      |
| TRASTUZUMAB      | UCS  | tgt | off label | specific master      |
| BEVACIZUMAB      | UCS  | tgt | off label | specific master      |
| CETUXIMAB        | UCS  | tgt | off label | specific master      |
| IRINOTECAN       | UCS  | ctx | off label | specific master      |
| OXALIPLATIN      | UCS  | ctx | off label | specific master      |
| PANITUMUMAB      | UCS  | tgt | off label | specific master      |
| TEMOZOLOMIDE     | UCS  | ctx | off label | specific master      |
| CRIZOTINIB       | UCS  | tgt | off label | specific master      |
| ETOPOSIDE        | UCS  | ctx | off label | specific master      |
| CARBOPLATIN      | UCS  | ctx | off label | specific master      |

|                  |        |     |           |                      |
|------------------|--------|-----|-----------|----------------------|
| OLAPARIB         | UCS    | tgt | off label | specific master      |
| MITOMYCIN        | UCS    | ctx | off label | specific master      |
| DABRAFENIB       | UCS    | tgt | off label | specific master      |
| PEMBROLIZUMAB    | UCS    | tgt | off label | specific master      |
| TRAMETINIB       | UCS    | tgt | off label | specific master      |
| VEMURAFENIB      | UCS    | tgt | off label | specific master      |
| IFOSFAMIDE       | UCS    | ctx | off label | specific master      |
| CETUXIMAB        | UCS    | tgt | off label | transcription factor |
| THIOTEPA         | PANCAN | ctx | off label | general master       |
| CAPECITABINE     | PANCAN | ctx | off label | general master       |
| CYCLOPHOSPHAMIDE | PANCAN | ctx | off label | general master       |
| DOCETAXEL        | PANCAN | ctx | off label | general master       |
| EPIRUBICIN       | PANCAN | ctx | off label | general master       |
| EVEROLIMUS       | PANCAN | tgt | off label | general master       |
| FLUOROURACIL     | PANCAN | ctx | off label | general master       |
| FULVESTRANT      | PANCAN | tgt | off label | general master       |
| GEMCITABINE      | PANCAN | ctx | off label | general master       |
| LETROZOLE        | PANCAN | tgt | off label | general master       |
| METHOTREXATE     | PANCAN | ctx | off label | general master       |
| PACLITAXEL       | PANCAN | ctx | off label | general master       |
| PERTUZUMAB       | PANCAN | tgt | off label | general master       |
| TRASTUZUMAB      | PANCAN | tgt | off label | general master       |
| BEVACIZUMAB      | PANCAN | tgt | off label | general master       |
| CETUXIMAB        | PANCAN | tgt | off label | general master       |
| IRINOTECAN       | PANCAN | ctx | off label | general master       |
| OXALIPLATIN      | PANCAN | ctx | off label | general master       |
| PANITUMUMAB      | PANCAN | tgt | off label | general master       |
| REGORAFENIB      | PANCAN | tgt | off label | general master       |
| TEMOZOLOMIDE     | PANCAN | ctx | off label | general master       |
| TEMSIROLIMUS     | PANCAN | tgt | off label | general master       |
| CRIZOTINIB       | PANCAN | tgt | off label | general master       |
| ETOPOSIDE        | PANCAN | ctx | off label | general master       |
| CARBOPLATIN      | PANCAN | ctx | off label | general master       |
| OLAPARIB         | PANCAN | tgt | off label | general master       |
| MITOMYCIN        | PANCAN | ctx | off label | general master       |
| DABRAFENIB       | PANCAN | tgt | off label | general master       |
| PEMBROLIZUMAB    | PANCAN | tgt | off label | general master       |
| TRAMETINIB       | PANCAN | tgt | off label | general master       |
| VEMURAFENIB      | PANCAN | tgt | off label | general master       |
| FLOXURIDINE      | PANCAN | ctx | off label | general master       |
| IFOSFAMIDE       | PANCAN | ctx | off label | general master       |

|                         |        |     |           |                |
|-------------------------|--------|-----|-----------|----------------|
| CABOZANTINIB            | PANCAN | tgt | off label | general master |
| VANDETANIB              | PANCAN | tgt | off label | general master |
| LAPATINIB DITOSYLATE    | PANCAN | tgt | off label | general master |
| LEUCOVORIN              | PANCAN | ctx | off label | general master |
| AXITINIB                | PANCAN | tgt | off label | general master |
| AFATINIB                | PANCAN | tgt | off label | general master |
| CERITINIB               | PANCAN | tgt | off label | general master |
| ERLOTINIB HYDROCHLORIDE | PANCAN | tgt | off label | general master |
| GEFITINIB               | PANCAN | tgt | off label | general master |
| FLUTAMIDE               | PANCAN | tgt | off label | general master |
| NIVOLUMAB               | PANCAN | tgt | off label | general master |
| LOMUSTINE               | PANCAN | ctx | off label | general master |
| ENZALUTAMIDE            | PANCAN | tgt | off label | general master |
| BICALUTAMIDE            | PANCAN | tgt | off label | general master |

Drugs targeting the cancer matrisome. Results are divided by tumor type, gross mechanism of action (ctx, cytotoxic drug; tgt, targeted drug), potential use (on or off label) and molecular target (Pan-Cancer – “general” or cancer-specific – “specific” – master regulators, transcription factors and matrisome molecules). Drugs with Pan-Cancer activity are reported in red.



**Supplemental Table 11. List of FANTOM5 samples**

| <b>Sample ID</b> | <b>Tumor(s)</b>  |
|------------------|------------------|
| CNhs11893        | ACC              |
| CNhs12848        | BLCA             |
| CNhs11256        | BLCA             |
| CNhs10733        | BLCA             |
| CNhs10735        | BLCA             |
| CNhs11261        | BLCA             |
| CNhs11844        | BRCA             |
| CNhs11943        | BRCA             |
| CNhs10736        | BRCA             |
| CNhs11100        | BRCA             |
| CNhs11259        | BRCA             |
| CNhs10748        | CESC             |
| CNhs12325        | CESC             |
| CNhs12326        | CESC             |
| CNhs12327        | CESC             |
| CNhs11825        | CESC             |
| CNhs11885        | CESC             |
| CNhs10750        | CHOL             |
| CNhs11265        | CHOL             |
| CNhs11283        | CHOL             |
| CNhs11280        | COAD; READ       |
| CNhs10737        | COAD; READ       |
| CNhs10734        | COAD; READ       |
| CNhs11255        | COAD; READ       |
| CNhs11252        | ESCA             |
| CNhs11889        | HNSC             |
| CNhs10732        | HNSC             |
| CNhs10752        | HNSC             |
| CNhs11287        | HNSC             |
| CNhs11717        | HNSC             |
| CNhs11810        | HNSC             |
| CNhs11849        | HNSC             |
| CNhs11892        | KICH; KIRP; KIRC |
| CNhs11728        | KICH; KIRP; KIRC |
| CNhs10729        | KICH; KIRP; KIRC |
| CNhs11257        | KICH; KIRP; KIRC |

|           |          |
|-----------|----------|
| CNhs13053 | LAML     |
| CNhs13054 | LAML     |
| CNhs13502 | LAML     |
| CNhs13052 | LAML     |
| CNhs11864 | LAML     |
| CNhs13055 | LAML     |
| CNhs13503 | LAML     |
| CNhs13504 | LAML     |
| CNhs13056 | LAML     |
| CNhs13057 | LAML     |
| CNhs13050 | LAML     |
| CNhs13051 | LAML     |
| CNhs10722 | LAML     |
| CNhs10723 | LAML     |
| CNhs10724 | LAML     |
| CNhs13058 | LAML     |
| CNhs13059 | LAML     |
| CNhs13060 | LAML     |
| CNhs13505 | LAML     |
| CNhs13049 | LAML     |
| CNhs11888 | LAML     |
| CNhs11843 | LAML     |
| CNhs10742 | LGG; GBM |
| CNhs11846 | LGG; GBM |
| CNhs11185 | LGG; GBM |
| CNhs11248 | LGG; GBM |
| CNhs11272 | LGG; GBM |
| CNhs10731 | LGG; GBM |
| CNhs12805 | LGG; GBM |
| CNhs11861 | LGG; GBM |
| CNhs11276 | LGG; GBM |
| CNhs11284 | LGG; GBM |
| CNhs11818 | LGG; GBM |
| CNhs11811 | LGG; GBM |
| CNhs11868 | LIHC     |
| CNhs11742 | LIHC     |
| CNhs12328 | LIHC     |
| CNhs12329 | LIHC     |
| CNhs12330 | LIHC     |
| CNhs11271 | LIHC     |
| CNhs11933 | LIHC     |

|           |            |
|-----------|------------|
| CNhs11838 | LUAD; LUSC |
| CNhs11862 | LUAD; LUSC |
| CNhs11840 | LUAD; LUSC |
| CNhs11841 | LUAD; LUSC |
| CNhs11834 | LUAD; LUSC |
| CNhs11274 | LUAD; LUSC |
| CNhs10751 | LUAD; LUSC |
| CNhs11277 | LUAD; LUSC |
| CNhs12806 | LUAD; LUSC |
| CNhs11275 | LUAD; LUSC |
| CNhs10726 | LUAD; LUSC |
| CNhs10625 | LUAD; LUSC |
| CNhs11680 | LUAD; LUSC |
| CNhs11786 | LUAD; LUSC |
| CNhs12808 | LUAD; LUSC |
| CNhs11285 | LUAD; LUSC |
| CNhs12809 | LUAD; LUSC |
| CNhs11812 | LUAD; LUSC |
| CNhs11273 | LUAD; LUSC |
| CNhs11263 | MESO       |
| CNhs11264 | MESO       |
| CNhs13066 | MESO       |
| CNhs13067 | MESO       |
| CNhs13068 | MESO       |
| CNhs13069 | MESO       |
| CNhs13070 | MESO       |
| CNhs13072 | MESO       |
| CNhs13073 | MESO       |
| CNhs13063 | MESO       |
| CNhs13062 | MESO       |
| CNhs13064 | MESO       |
| CNhs13061 | MESO       |
| CNhs13074 | MESO       |
| CNhs13075 | MESO       |
| CNhs11832 | PAAD       |
| CNhs11883 | PAAD       |
| CNhs11866 | PCPG       |
| CNhs11744 | PCPG       |
| CNhs11753 | PCPG       |
| CNhs11853 | PCPG       |
| CNhs11854 | PCPG       |

|           |      |
|-----------|------|
| CNhs11830 | PCPG |
| CNhs11183 | PCPG |
| CNhs11245 | PCPG |
| CNhs10628 | PRAD |
| CNhs11260 | PRAD |
| CNhs11243 | PRAD |
| CNhs11247 | SARC |
| CNhs10728 | SARC |
| CNhs11860 | SARC |
| CNhs11842 | SARC |
| CNhs11848 | SARC |
| CNhs11722 | SARC |
| CNhs11723 | SARC |
| CNhs11724 | SARC |
| CNhs11870 | SARC |
| CNhs11851 | SARC |
| CNhs11729 | SARC |
| CNhs11821 | SARC |
| CNhs11835 | SARC |
| CNhs11279 | SARC |
| CNhs11290 | SARC |
| CNhs11877 | SARC |
| CNhs11269 | SARC |
| CNhs11857 | SARC |
| CNhs11244 | SARC |
| CNhs11281 | SKCM |
| CNhs11254 | SKCM |
| CNhs11882 | STAD |
| CNhs11737 | STAD |
| CNhs11819 | STAD |
| CNhs11286 | STAD |
| CNhs11738 | STAD |
| CNhs10753 | STAD |
| CNhs11270 | STAD |
| CNhs11736 | STAD |
| CNhs11734 | STAD |
| CNhs11884 | TGCT |
| CNhs11876 | TGCT |
| CNhs12351 | TGCT |
| CNhs12362 | TGCT |
| CNhs11726 | TGCT |

|           |           |
|-----------|-----------|
| CNhs10745 | THCA      |
| CNhs11716 | THCA      |
| CNhs11739 | THCA      |
| CNhs11872 | THCA      |
| CNhs11725 | UCS; UCEC |
| CNhs11747 | UCS; UCEC |
| CNhs11288 | UCS; UCEC |
| CNhs11289 | UCS; UCEC |
| CNhs11930 | UCS; UCEC |
| CNhs11266 | UCS; UCEC |
| CNhs11249 | UCS; UCEC |
| CNhs11748 | UCS; UCEC |
| CNhs11824 | UCS; UCEC |
| CNhs11944 | UCS; UCEC |

**Supplemental Table 12. Matching GTEx-TCGA samples**

| <b>GTEx</b>     | <b>TCGA</b>      |
|-----------------|------------------|
| Adipose Tissue  | SARC             |
| Adrenal Gland   | ACC              |
| Bladder         | BLCA             |
| Blood           | LAML             |
| Bone Marrow     | LAML             |
| Brain           | GBM; LGG         |
| Breast          | BRCA             |
| Cervix Uteri    | UCEC; UCS        |
| Colon           | COAD; READ       |
| Esophagus       | ESCA             |
| Kidney          | KICH; KIRC; KIRP |
| Liver           | LIHC             |
| Lung            | LUAD; LUSC       |
| Muscle          | SARC             |
| Nerve           | PCPG             |
| Ovary           | OV               |
| Pancreas        | PAAD             |
| Prostate        | PRAD             |
| Salivary Gland  | HNSC             |
| Small Intestine | COAD; READ       |
| Stomach         | STAD             |
| Testis          | TGCT             |
| Thyroid         | THCA             |
| Uterus          | UCEC; UCS        |

**Supplemental Table 13. Cross-validation cohorts from Oncomine**

| <b>Cohort and test (relative publication follows)</b>     | <b>Cluster</b> |
|-----------------------------------------------------------|----------------|
| 1. Diffuse Gastric Adenocarcinoma vs. Normal              | Digestive      |
| <i>Cho Gastric, Clin Cancer Res, 2011</i>                 | Digestive      |
| 2. Gastric Adenocarcinoma vs. Normal                      | Digestive      |
| <i>Cho Gastric, Clin Cancer Res, 2011</i>                 | Digestive      |
| 3. Gastric Intestinal Type Adenocarcinoma vs. Normal      | Digestive      |
| <i>Cho Gastric, Clin Cancer Res, 2011</i>                 | Digestive      |
| 4. Gastric Mixed Adenocarcinoma vs. Normal                | Digestive      |
| <i>Cho Gastric, Clin Cancer Res, 2011</i>                 | Digestive      |
| 5. Gastric Cancer vs. Normal                              | Digestive      |
| <i>Cui Gastric, Nucleic Acids Res, 2011</i>               | Digestive      |
| 6. Diffuse Gastric Adenocarcinoma vs. Normal              | Digestive      |
| <i>Deng Gastric, Gut, 2012</i>                            | Digestive      |
| 7. Gastric Adenocarcinoma vs. Normal                      | Digestive      |
| <i>Deng Gastric, Gut, 2012</i>                            | Digestive      |
| 8. Gastric Cancer vs. Normal                              | Digestive      |
| <i>Deng Gastric, Gut, 2012</i>                            | Digestive      |
| 9. Gastric Intestinal Type Adenocarcinoma vs. Normal      | Digestive      |
| <i>Deng Gastric, Gut, 2012</i>                            | Digestive      |
| 10. Gastric Mixed Adenocarcinoma vs. Normal               | Digestive      |
| <i>Deng Gastric, Gut, 2012</i>                            | Digestive      |
| 11. Diffuse Gastric Adenocarcinoma vs. Normal             | Digestive      |
| <i>DErrico Gastric, Eur J Cancer, 2009</i>                | Digestive      |
| 12. Gastric Intestinal Type Adenocarcinoma vs. Normal     | Digestive      |
| <i>DErrico Gastric, Eur J Cancer, 2009</i>                | Digestive      |
| 13. Gastric Mixed Adenocarcinoma vs. Normal               | Digestive      |
| <i>DErrico Gastric, Eur J Cancer, 2009</i>                | Digestive      |
| 14. Rectal Adenocarcinoma vs. Normal                      | Digestive      |
| <i>Gaedcke Colorectal, Genes Chromosomes Cancer, 2010</i> | Digestive      |
| 15. Colorectal Carcinoma vs. Normal                       | Digestive      |
| <i>Hong Colorectal, Clin Exp Metastasis, 2010</i>         | Digestive      |
| 16. Esophageal Squamous Cell Carcinoma vs. Normal         | Digestive      |
| <i>Hu Esophagus, BMC Genomics, 2010</i>                   | Digestive      |
| 17. Esophageal Squamous Cell Carcinoma vs. Normal         | Digestive      |
| <i>Hu Esophagus 2, Cancer Res, 2009</i>                   | Digestive      |
| 18. Cecum Adenocarcinoma vs. Normal                       | Digestive      |
| <i>Kaiser Colon, Genome Biol, 2007</i>                    | Digestive      |
| 19. Colon Adenocarcinoma vs. Normal                       | Digestive      |

|                                                    |           |
|----------------------------------------------------|-----------|
| <i>Kaiser Colon, Genome Biol, 2007</i>             | Digestive |
| 20. Colon Mucinous Adenocarcinoma vs. Normal       | Digestive |
| <i>Kaiser Colon, Genome Biol, 2007</i>             | Digestive |
| 21. Rectal Adenocarcinoma vs. Normal               | Digestive |
| <i>Kaiser Colon, Genome Biol, 2007</i>             | Digestive |
| 22. Rectal Mucinous Adenocarcinoma vs. Normal      | Digestive |
| <i>Kaiser Colon, Genome Biol, 2007</i>             | Digestive |
| 23. Rectosigmoid Adenocarcinoma vs. Normal         | Digestive |
| <i>Kaiser Colon, Genome Biol, 2007</i>             | Digestive |
| 24. Barrett's Esophagus vs. Normal                 | Digestive |
| <i>Kim Esophagus, PLoS One, 2010</i>               | Digestive |
| 25. Esophageal Adenocarcinoma vs. Normal           | Digestive |
| <i>Kim Esophagus, PLoS One, 2010</i>               | Digestive |
| 26. Esophageal Adenocarcinoma vs. Normal           | Digestive |
| <i>Kimchi Esophagus, Cancer Res, 2005</i>          | Digestive |
| 27. Colon Adenocarcinoma vs. Normal                | Digestive |
| <i>Kurashina Colon, Cancer Sci, 2008</i>           | Digestive |
| 28. Colon Mucinous Adenocarcinoma vs. Normal       | Digestive |
| <i>Kurashina Colon, Cancer Sci, 2008</i>           | Digestive |
| 29. Rectal Adenocarcinoma vs. Normal               | Digestive |
| <i>Kurashina Colon, Cancer Sci, 2008</i>           | Digestive |
| 30. Colon Adenocarcinoma vs. Normal                | Digestive |
| <i>Notterman Colon, Cancer Res, 2001</i>           | Digestive |
| 31. Colon Adenoma vs. Normal                       | Digestive |
| <i>Sabates-Bellver Colon, Mol Cancer Res, 2007</i> | Digestive |
| 32. Rectal Adenoma vs. Normal                      | Digestive |
| <i>Sabates-Bellver Colon, Mol Cancer Res, 2007</i> | Digestive |
| 33. Colorectal Adenocarcinoma vs. Normal           | Digestive |
| <i>Skrzypczak Colorectal, PLoS One, 2010</i>       | Digestive |
| 34. Colorectal Carcinoma vs. Normal                | Digestive |
| <i>Skrzypczak Colorectal, PLoS One, 2010</i>       | Digestive |
| 35. Colon Adenoma Epithelia vs. Normal             | Digestive |
| <i>Skrzypczak Colorectal 2, PLoS One, 2010</i>     | Digestive |
| 36. Colon Adenoma vs. Normal                       | Digestive |
| <i>Skrzypczak Colorectal 2, PLoS One, 2010</i>     | Digestive |
| 37. Colon Carcinoma Epithelia vs. Normal           | Digestive |
| <i>Skrzypczak Colorectal 2, PLoS One, 2010</i>     | Digestive |
| 38. Colon Carcinoma vs. Normal                     | Digestive |
| <i>Skrzypczak Colorectal 2, PLoS One, 2010</i>     | Digestive |
| 39. Esophageal Squamous Cell Carcinoma vs. Normal  | Digestive |
| <i>Su Esophagus 2, Clin Cancer Res, 2011</i>       | Digestive |



|                                                       |           |
|-------------------------------------------------------|-----------|
| 40. Rectal Adenocarcinoma vs. Normal                  | Digestive |
| <i>TCGA Colorectal, No Associated Paper, 2011</i>     | Digestive |
| 41. Rectosigmoid Adenocarcinoma vs. Normal            | Digestive |
| <i>TCGA Colorectal, No Associated Paper, 2011</i>     | Digestive |
| 42. Cecum Adenocarcinoma vs. Normal                   | Digestive |
| <i>TCGA Colorectal 2, No Associated Paper, 2011</i>   | Digestive |
| 43. Colon Adenocarcinoma vs. Normal                   | Digestive |
| <i>TCGA Colorectal 2, No Associated Paper, 2011</i>   | Digestive |
| 44. Colon Mucinous Adenocarcinoma vs. Normal          | Digestive |
| <i>TCGA Colorectal 2, No Associated Paper, 2011</i>   | Digestive |
| 45. Rectal Adenocarcinoma vs. Normal                  | Digestive |
| <i>TCGA Colorectal 2, No Associated Paper, 2011</i>   | Digestive |
| 46. Rectal Mucinous Adenocarcinoma vs. Normal         | Digestive |
| <i>TCGA Colorectal 2, No Associated Paper, 2011</i>   | Digestive |
| 47. Rectosigmoid Adenocarcinoma vs. Normal            | Digestive |
| <i>TCGA Colorectal 2, No Associated Paper, 2011</i>   | Digestive |
| 48. Diffuse Gastric Adenocarcinoma vs. Normal         | Digestive |
| <i>TCGA Gastric, No Associated Paper, 2013</i>        | Digestive |
| 49. Gastric Adenocarcinoma vs. Normal                 | Digestive |
| <i>TCGA Gastric, No Associated Paper, 2013</i>        | Digestive |
| 50. Gastric Intestinal Type Adenocarcinoma vs. Normal | Digestive |
| <i>TCGA Gastric, No Associated Paper, 2013</i>        | Digestive |
| 51. Gastric Papillary Adenocarcinoma vs. Normal       | Digestive |
| <i>TCGA Gastric, No Associated Paper, 2013</i>        | Digestive |
| 52. Gastric Tubular Adenocarcinoma vs. Normal         | Digestive |
| <i>TCGA Gastric, No Associated Paper, 2013</i>        | Digestive |
| 53. Mucinous Gastric Adenocarcinoma vs. Normal        | Digestive |
| <i>TCGA Gastric, No Associated Paper, 2013</i>        | Digestive |
| 54. Gastric Cancer vs. Normal                         | Digestive |
| <i>Wang Gastric, Med Oncol, 2010</i>                  | Digestive |
| Lung Adenocarcinoma vs. Normal                        | Lung      |
| <i>Beer Lung, Nat Med, 2002</i>                       | Lung      |
| 2. Large Cell Lung Carcinoma vs. Normal               | Lung      |
| <i>Hou Lung, PLoS One, 2010</i>                       | Lung      |
| 3. Lung Adenocarcinoma vs. Normal                     | Lung      |
| <i>Hou Lung, PLoS One, 2010</i>                       | Lung      |
| 4. Squamous Cell Lung Carcinoma vs. Normal            | Lung      |
| <i>Hou Lung, PLoS One, 2010</i>                       | Lung      |
| 5. Lung Adenocarcinoma vs. Normal                     | Lung      |
| <i>Landi Lung, PLoS ONE, 2008</i>                     | Lung      |
| 6. Lung Adenocarcinoma vs. Normal                     | Lung      |

|                                                               |       |
|---------------------------------------------------------------|-------|
| <i>Okayama Lung, Cancer Res, 2012</i>                         | Lung  |
| 7. Lung Adenocarcinoma vs. Normal                             | Lung  |
| <i>Selamat Lung, Genome Res, 2012</i>                         | Lung  |
| 8. Lung Adenocarcinoma vs. Normal                             | Lung  |
| <i>Su Lung, BMC Genomics, 2007</i>                            | Lung  |
| 9. Acinar Lung Adenocarcinoma vs. Normal                      | Lung  |
| <i>TCGA Lung 2, No Associated Paper, 2012</i>                 | Lung  |
| 10. Lung Adenocarcinoma vs. Normal                            | Lung  |
| <i>TCGA Lung 2, No Associated Paper, 2012</i>                 | Lung  |
| 11. Lung Adenocarcinoma, Mixed Subtype vs. Normal             | Lung  |
| <i>TCGA Lung 2, No Associated Paper, 2012</i>                 | Lung  |
| 12. Lung Mucinous Adenocarcinoma vs. Normal                   | Lung  |
| <i>TCGA Lung 2, No Associated Paper, 2012</i>                 | Lung  |
| 13. Micropapillary Lung Adenocarcinoma vs. Normal             | Lung  |
| <i>TCGA Lung 2, No Associated Paper, 2012</i>                 | Lung  |
| 14. Mucinous Bronchioloalveolar Carcinoma vs. Normal          | Lung  |
| <i>TCGA Lung 2, No Associated Paper, 2012</i>                 | Lung  |
| 15. Non-Mucinous Bronchioloalveolar Carcinoma vs. Normal      | Lung  |
| <i>TCGA Lung 2, No Associated Paper, 2012</i>                 | Lung  |
| 16. Squamous Cell Lung Carcinoma vs. Normal                   | Lung  |
| <i>TCGA Lung 2, No Associated Paper, 2012</i>                 | Lung  |
| 17. Squamous Cell Lung Carcinoma, Basaloid Variant vs. Normal | Lung  |
| <i>TCGA Lung 2, No Associated Paper, 2012</i>                 | Lung  |
| 18. Squamous Cell Lung Carcinoma vs. Normal                   | Lung  |
| <i>Wachi Lung, Bioinformatics, 2005</i>                       | Lung  |
| 19. Lung Adenocarcinoma vs. Normal                            | Lung  |
| <i>Weiss Lung, Sci Transl Med, 2010</i>                       | Lung  |
| 20. Squamous Cell Lung Carcinoma vs. Normal                   | Lung  |
| <i>Weiss Lung, Sci Transl Med, 2010</i>                       | Lung  |
| 2. Anaplastic Astrocytoma vs. Normal                          | Brain |
| <i>Beroukhim Brain, Proc Natl Acad Sci U S A, 2007</i>        | Brain |
| 3. Anaplastic Oligodendroglioma vs. Normal                    | Brain |
| <i>Beroukhim Brain, Proc Natl Acad Sci U S A, 2007</i>        | Brain |
| 4. Primary Glioblastoma vs. Normal                            | Brain |
| <i>Beroukhim Brain, Proc Natl Acad Sci U S A, 2007</i>        | Brain |
| 5. Secondary Glioblastoma vs. Normal                          | Brain |
| <i>Beroukhim Brain, Proc Natl Acad Sci U S A, 2007</i>        | Brain |
| 6. Anaplastic Oligoastrocytoma vs. Normal                     | Brain |
| <i>Bredel Brain 2, Cancer Res, 2005</i>                       | Brain |
| 7. Anaplastic Oligodendroglioma vs. Normal                    | Brain |
| <i>Bredel Brain 2, Cancer Res, 2005</i>                       | Brain |

|                                                    |       |
|----------------------------------------------------|-------|
| 8. Glioblastoma vs. Normal                         | Brain |
| <i>Bredel Brain 2, Cancer Res, 2005</i>            | Brain |
| 9. Oligodendroglioma vs. Normal                    | Brain |
| <i>Bredel Brain 2, Cancer Res, 2005</i>            | Brain |
| 10. Anaplastic Oligoastrocytoma vs. Normal         | Brain |
| <i>French Brain, Cancer Res, 2006</i>              | Brain |
| 11. Anaplastic Oligodendroglioma vs. Normal        | Brain |
| <i>French Brain, Cancer Res, 2006</i>              | Brain |
| 12. Pilocytic Astrocytoma vs. Normal               | Brain |
| <i>Gutmann Brain, Cancer Res, 2002</i>             | Brain |
| 17. Glioblastoma vs. Normal                        | Brain |
| <i>Lee Brain, Cancer Cell, 2006</i>                | Brain |
| 18. Glioblastoma vs. Normal                        | Brain |
| <i>Liang Brain, Proc Natl Acad Sci U S A, 2005</i> | Brain |
| 19. Oligoastrocytoma vs. Normal                    | Brain |
| <i>Liang Brain, Proc Natl Acad Sci U S A, 2005</i> | Brain |
| 20. Glioblastoma vs. Normal                        | Brain |
| <i>Murat Brain, J Clin Oncol, 2008</i>             | Brain |
| 23. Astrocytoma vs. Normal                         | Brain |
| <i>Shai Brain, Oncogene, 2003</i>                  | Brain |
| 24. Glioblastoma vs. Normal                        | Brain |
| <i>Shai Brain, Oncogene, 2003</i>                  | Brain |
| 25. Oligodendroglioma vs. Normal                   | Brain |
| <i>Shai Brain, Oncogene, 2003</i>                  | Brain |
| 27. Anaplastic Astrocytoma vs. Normal              | Brain |
| <i>Sun Brain, Cancer Cell, 2006</i>                | Brain |
| 28. Diffuse Astrocytoma vs. Normal                 | Brain |
| <i>Sun Brain, Cancer Cell, 2006</i>                | Brain |
| 29. Glioblastoma vs. Normal                        | Brain |
| <i>Sun Brain, Cancer Cell, 2006</i>                | Brain |
| 30. Oligodendroglioma vs. Normal                   | Brain |
| <i>Sun Brain, Cancer Cell, 2006</i>                | Brain |
| 31. Brain Glioblastoma vs. Normal                  | Brain |
| <i>TCGA Brain, No Associated Paper, 2013</i>       | Brain |
| 32. Glioblastoma vs. Normal                        | Brain |
| <i>TCGA Brain, No Associated Paper, 2013</i>       | Brain |
| 33. Brain Astrocytoma vs. Normal                   | Brain |
| <i>TCGA Brain 2, No Associated Paper, 2013</i>     | Brain |
| 34. Brain Glioblastoma vs. Normal                  | Brain |
| <i>TCGA Brain 2, No Associated Paper, 2013</i>     | Brain |
| 35. Brain Oligodendroglioma vs. Normal             | Brain |

|                                                                  |               |
|------------------------------------------------------------------|---------------|
| <i>TCGA Brain 2, No Associated Paper, 2013</i>                   | Brain         |
| 36. Glioblastoma vs. Normal                                      | Brain         |
| <i>TCGA Brain 2, No Associated Paper, 2013</i>                   | Brain         |
| 37. Malignant Glioma, NOS vs. Normal                             | Brain         |
| <i>TCGA Brain 2, No Associated Paper, 2013</i>                   | Brain         |
| 38. Oligoastrocytoma vs. Normal                                  | Brain         |
| <i>TCGA Brain 2, No Associated Paper, 2013</i>                   | Brain         |
| 1. Cervical Squamous Cell Carcinoma vs. Normal                   | Ovary-Uterine |
| <i>Biewenga Cervix, Gynecol Oncol, 2008</i>                      | Ovary-Uterine |
| 2. Ovarian Clear Cell Adenocarcinoma vs. Normal                  | Ovary-Uterine |
| <i>Lu Ovarian, Clin Cancer Res, 2004</i>                         | Ovary-Uterine |
| 3. Ovarian Endometrioid Adenocarcinoma vs. Normal                | Ovary-Uterine |
| <i>Lu Ovarian, Clin Cancer Res, 2004</i>                         | Ovary-Uterine |
| 4. Ovarian Mucinous Adenocarcinoma vs. Normal                    | Ovary-Uterine |
| <i>Lu Ovarian, Clin Cancer Res, 2004</i>                         | Ovary-Uterine |
| 5. Ovarian Serous Adenocarcinoma vs. Normal                      | Ovary-Uterine |
| <i>Lu Ovarian, Clin Cancer Res, 2004</i>                         | Ovary-Uterine |
| 6. Cervical Cancer vs. Normal                                    | Ovary-Uterine |
| <i>Pyeon Multi-cancer, Cancer Res, 2007</i>                      | Ovary-Uterine |
| 7. Cervical Adenocarcinoma vs. Normal                            | Ovary-Uterine |
| <i>Scotto Cervix, Genes Chromosomes Cancer, 2008</i>             | Ovary-Uterine |
| 8. Cervical Squamous Cell Carcinoma vs. Normal                   | Ovary-Uterine |
| <i>Scotto Cervix, Genes Chromosomes Cancer, 2008</i>             | Ovary-Uterine |
| 9. Cervical Keratinizing Squamous Cell Carcinoma vs. Normal      | Ovary-Uterine |
| <i>TCGA Cervix, No Associated Paper, 2012</i>                    | Ovary-Uterine |
| 10. Cervical Non-Keratinizing Squamous Cell Carcinoma vs. Normal | Ovary-Uterine |
| <i>TCGA Cervix, No Associated Paper, 2012</i>                    | Ovary-Uterine |
| 11. Cervical Squamous Cell Carcinoma vs. Normal                  | Ovary-Uterine |
| <i>TCGA Cervix, No Associated Paper, 2012</i>                    | Ovary-Uterine |
| 12. Ovarian Serous Cystadenocarcinoma vs. Normal                 | Ovary-Uterine |
| <i>TCGA Ovarian 2, No Associated Paper, 2013</i>                 | Ovary-Uterine |
| 13. Ovarian Serous Adenocarcinoma vs. Normal                     | Ovary-Uterine |
| <i>Yoshihara Ovarian, Cancer Sci, 2009</i>                       | Ovary-Uterine |

**Supplemental Table 14. Nomenclature match – The Cancer Genome Atlas (TCGA) and The Human Protein Atlas (THPA)**

| <b>TCGA nomenclature</b> | <b>THPA nomenclature</b> |
|--------------------------|--------------------------|
| BLCA                     | urothelial cancer        |
| BRCA                     | breast cancer            |
| CESC                     | cervical cancer          |
| COAD                     | colorectal cancer        |
| HNSC                     | head and neck cancer     |
| KICH                     | renal cancer             |
| KIRC                     | renal cancer             |
| KIRP                     | renal cancer             |
| GBM                      | glioma                   |
| LGG                      | glioma                   |
| LIHC                     | liver cancer             |
| LUAD                     | lung cancer              |
| LUSC                     | lung cancer              |
| OV                       | ovarian cancer           |
| PAAD                     | pancreatic cancer        |
| PRAD                     | prostate cancer          |
| READ                     | colorectal cancer        |
| SKCM                     | melanoma                 |
| STAD                     | stomach cancer           |
| TGCT                     | testis cancer            |
| THCA                     | thyroid cancer           |
| UCEC                     | endometrial cancer       |
